# Supplementary material for: Expression of lncRNAs in Low-Grade Gliomas and Glioblastoma Multiforme: An In Silico Analysis
Source: PLoS Med. 2016 Dec 6;13(12):e1002192. doi: 10.1371/journal.pmed.1002192 (PMC5140055; doi:10.1371/journal.pmed.1002192)
Supplement: S1 Table — (XLSX) [file pmed.1002192.s004.xlsx]

## Sheet: GBM_vs_Normal
lncRNA	median_GBM_expression(FPKM)	median_LGG_expression(FPKM)	median_Normal_expression(FPKM)	GBM_vs_Normal_FDR
RP11-670E13.6	1.54177	0.754015	0	1.75607e-34
RP11-548H3.1	3.75013	3.4869	0.860306	1.05184e-26
CTD-2026K11.1	20.3856	16.0037	3.07696	8.04272e-29
RP11-159K7.2	0.702056	0.476891	0.110149	3.81707e-12
RP4-559A3.6	2.20687	0.367586	0.0461269	5.27399e-35
AC005754.7	2.25496	1.09062	0.439571	5.41755e-10
GBM_LOC003161	0.584635	0.119679	0.0913318	1.06699e-20
RP11-175K6.1	1.26368	0.583676	0.129982	2.53941e-29
H19	18.4859	0.565424	0.784478	1.41063e-21
RP11-315A16.1	0.616755	0.134154	0	9.17299e-21
GS1-166A23.1	0.434176	0.738126	0	1.6083e-06
RP5-857K21.4	53.9367	0	0	3.95814e-07
RP11-156K13.3	0.61139	0.469693	0.124269	4.44981e-14
GBM_LOC030682	0.176925	0.534666	0	1.11576e-15
PCOLCE-AS1	2.40123	0.211814	0.0975541	9.92359e-33
RP11-42O4.2	1.23747	0.42131	0.199563	4.83826e-29
AC083864.3	0.215166	1.1663	0.00201721	1.26188e-16
GYG2-AS1	0.701013	2.54488	0	2.60766e-38
XX-FW81066F1.2	0.595513	0.163601	0.126196	2.55601e-21
CTD-3116E22.8	0.63296	1.07901	0.153152	2.87968e-09
AC011558.5	16.7793	8.3228	1.74296	8.88583e-27
TP53TG1	27.9968	20.7659	6.32073	8.00208e-24
RP11-300J18.2	2.012	0.326007	0.108861	4.11581e-34
BAALCOS	7.04726	6.28907	1.26941	4.30527e-22
Cabili_2091	0.301256	0.551936	0	2.63543e-06
EGFR-AS1	0.599364	0.309738	0.0451398	2.20725e-21
AC002454.1	2.15427	0.149096	0.265995	7.9308e-14
AC002456.2	6.24186	2.3058	0.302254	2.14634e-35
RP11-702H23.6	5.27025	1.05308	0.621388	1.17897e-37
RP11-20B24.4	18.6925	9.4408	4.11189	2.71973e-21
RP11-295G20.2	5.09549	1.70767	1.12464	2.29854e-22
HM13-AS1	7.39309	4.83976	1.66976	3.81092e-36
RP3-337O18.9	6.53787	5.94599	1.3821	4.0648e-25
NOVA1-AS1	1.31539	1.52948	0.093924	1.32233e-23
RP11-360L9.7	3.2717	0.987698	0.346489	3.03239e-29
CH507-39O4.1	0.372406	0.654546	0	1.00153e-12
ABHD15-AS1	2.21664	1.30632	0.487671	1.57285e-11
WWTR1-AS1	4.90348	1.89685	0.532075	6.31093e-30
RP11-69H7.3	3.55989	3.22736	0.724217	8.60137e-23
HOXD-AS2	1.80381	0.280816	0	1.91157e-42
LINC01116	4.26553	0.622559	0.381673	1.36943e-17
RP11-104H15.7	0.855942	0.909497	0.11201	6.97557e-27
PSMB8-AS1	9.32517	3.52439	0.827524	3.07781e-39
AC004702.2	0.933841	1.62485	0.210483	4.92571e-11
CTD-2521M24.9	4.09687	1.13402	0.704147	3.99905e-24
AC068535.3	0.633405	0.106486	0.0888117	2.01024e-12
Cabili_1332	7.62957	4.7118	1.15905	1.81525e-23
RP11-309L24.2	3.79698	0.863493	0.281316	4.39239e-22
RP11-400K9.4	0.762273	0.207646	0.145667	7.10059e-09
Cabili_1930	0.707021	1.06062	0.119073	8.9245e-13
RP11-394J1.2	2.02807	0.713561	0.280091	1.2467e-22
GBM_LOC047405	1.91913	1.77766	0.467156	1.01157e-21
LUCAT1	0.649297	0.0637787	0.0209366	6.88759e-20
LLNLR-470E3.1	1.90204	1.21929	0.107851	4.24599e-21
WEE2-AS1	4.28533	3.07459	0.638852	8.85807e-36
HOTAIR	0.712364	0	0	2.86026e-36
BAALC-AS1	13.2722	6.32604	2.54616	6.88759e-20
RP11-290L1.3	52.8535	72.7882	9.46241	1.10686e-25
RP11-733O18.1	0.818406	0.5121	0.117761	5.90076e-23
RP11-467L24.1	0.752041	0.586941	0.181983	1.78487e-06
CTC-425F1.4	650.284	358.053	108.806	7.09577e-35
HCP5	6.80154	2.32301	0.898752	2.23205e-23
RP11-159D12.11	0.898004	1.34975	0	5.77357e-07
RP11-705C15.5	2.31611	1.39544	0.50035	5.57699e-25
LAMA5-AS1	1.49362	1.55966	0.0930286	4.0648e-25
AC114730.2	0.86564	0.0887597	0.138897	4.40139e-20
RP5-826L7.1	0.73679	0.847492	0.150982	1.41638e-13
VTRNA2-1	5.81107	0	0	7.41108e-15
RP11-666O2.2	0.905392	0.479908	0.22555	2.37646e-19
RP11-134L10.1	5.16704	3.54562	1.29069	3.13012e-26
Cabili_1922	0.574564	0.587639	0	3.54579e-08
RP11-329B9.5	0.865186	1.61853	0.206712	6.75366e-10
AC002398.12	65.9527	20.8823	9.8932	2.29396e-32
CTB-129P6.7	0.720988	1.03246	0.0728754	7.36347e-32
WNT5A-AS1	0.712027	0.538781	0.0622627	1.17931e-29
HLA-DQB1-AS1	13.9241	2.64382	0.184157	5.0515e-23
LINC01279	5.15975	6.96365	0.279253	3.166e-33
RP11-556E13.1	1.29954	0.993589	0.0843667	2.50256e-21
RP11-84C10.2	0.792628	0.166225	0	5.38361e-23
HAS2-AS1	3.727	2.44429	0.202592	5.5018e-41
LINC01091	0.570866	0.183916	0.0671583	2.18887e-19
LINC01094	14.7818	15.8358	1.24898	7.2672e-29
RP11-145M9.6	3.03714	3.45501	0	4.70947e-12
CTD-3187F8.14	1.00434	0.214054	0.044435	1.27455e-34
AC007362.3	0.570894	0.31825	0.0753875	9.18212e-15
RP11-485G4.2	0.655914	0.407432	4.43828e-06	3.0256e-23
Cabili_285	0.520651	0.30809	0.079866	2.00819e-15
RP11-71N10.1	8.17698	2.41009	1.1115	5.16112e-15
RP11-565P22.2	0.808557	0.0570406	0	8.60453e-21
RP11-196G18.3	1.58841	0.410322	0.20035	1.2769e-27
RP11-395B7.7	8.81133	7.04067	1.92859	2.28356e-15
PYCARDOS	3.11486	1.20373	0.346158	1.83301e-33
RP11-152H18.3	31.7019	29.0491	6.96303	1.80048e-30
AC074212.5	4.70878	2.61396	0.853075	7.76941e-28
CTD-2013N17.4	0.154081	1.4451	0.0320759	1.67977e-08
RP3-326L13.3	6.43252	10.0657	0.918558	6.79834e-18
LEF1-AS1	1.60247	0.601406	0.241957	1.61202e-26
RP11-126K1.6	8.09482	6.16833	1.40617	1.42706e-32
AC007319.1	1.44358	0.688701	0.124422	1.33418e-18
RP11-403A3.2	5.0667	1.07132	0.273618	3.80042e-32
RP11-403A3.3	30.4398	5.57448	0.804982	5.79343e-39
RP11-403A3.1	0.63099	0.279393	0.137688	4.72914e-13
LINC01023	5.58711	3.7269	0.93293	2.8723e-32
CTD-2616J11.9	23.4013	24.0075	4.25063	5.67924e-16
RP11-259N19.1	2.52976	3.09996	0.208805	8.17721e-32
LINC01088	8.31993	65.9516	0.901242	7.38347e-17
AC009005.2	2.05554	0.945182	0.240143	2.81199e-29
RP11-236B18.5	0.663193	1.03264	0	4.47744e-08
RP11-434I12.2	0.654486	0.139777	0.0450463	4.55007e-36
FOXD1-AS1	16.1969	6.77329	1.16026	7.30919e-36
Cabili_387	7.33601	7.99861	1.7049	1.87311e-16
GBM_LOC026870	0.21876	0.502612	0	7.4507e-33
CTD-3035K23.7	1.92919	0.59677	0.259066	1.51054e-26
CTD-3035K23.3	0.880262	0.456168	0.118611	4.69254e-24
RP11-227D13.1	0.634777	0.484387	0.148443	8.60941e-26
AC004854.4	0.429497	1.19813	0.0274337	1.33889e-07
CTC-241F20.3	2.27848	0.907772	0.345863	2.6678e-39
RP11-317P15.4	0.570396	0.413766	0.0448201	5.43581e-36
TFAP2A-AS1	1.15	1.51293	0.0188821	4.41839e-32
RP11-252K23.2	0.777991	0.413107	0.16163	9.83607e-15
CH507-513H4.1	3.74817	0.690616	0.0341937	2.22933e-11
TTTY14	4.25999	2.15075	0.77982	6.17699e-06
RP11-54A9.1	0.664014	0.101116	0.0332048	1.26693e-29
SNORD3A	3.37786	0.958827	0.732271	2.5758e-10
RP11-552F3.9	2.06395	1.40417	0.504462	9.21687e-28
CTD-2139B15.2	3.4184	2.43474	0.313634	3.45361e-27
AC015933.2	5.41635	2.36568	1.09189	5.44899e-18
RP11-783K16.5	6.86537	2.93377	1.3516	5.77431e-27
PRC1-AS1	9.92942	2.72197	2.34426	2.09752e-26
GBM_LOC012292	0.846186	1.03962	0.0614391	6.17083e-11
CTB-129P6.4	1.82933	0.743226	0.234273	5.33986e-37
LINC01410	5.19407	2.48308	0.808869	1.06595e-18
GBM_LOC039900	0.534874	1.05079	0.0307712	7.87449e-23
RP4-625H18.2	0.85299	1.0217	0.133226	5.44899e-18
UXT-AS1	3.45299	2.21144	0.836142	3.2438e-36
RP4-580N22.2	1.91304	1.90409	0.0545406	4.50892e-23
OSMR-AS1	0.691294	0.135566	0.0430768	4.04269e-22
AC096559.1	0.797896	0.0942734	0.100252	5.57298e-17
RP11-49K24.4	0.79149	0.406398	0.0988774	7.36244e-10
GBM_LOC014495	1.08888	3.22645	0	5.32135e-11
RP11-571M6.7	145.893	94.8188	35.889	3.04249e-30
RP11-472N13.3	5.51102	3.16575	1.37442	2.96716e-21
RP11-356I2.4	0.673134	0.227639	0.14429	8.88583e-27
AC006126.4	0.524153	0.0315448	0.00197316	5.27779e-30
RP11-742B18.1	0.834079	0.00555257	0.00132479	4.41839e-32
RP11-161H23.5	144.855	10.4434	2.92985	4.91394e-39
AC011899.9	0.692279	0.242195	0.0826443	2.20725e-21
CTC-498J12.1	1.0645	0.465698	0.0126316	2.37787e-30
VCAN-AS1	29.1218	32.5575	3.40424	2.02672e-28
RP11-217B7.2	0.336817	0.503657	0.0827811	6.00404e-14
RP11-10A14.3	0.55294	0.264454	0.109245	2.9017e-15
CTD-2012K14.4	2.15241	0.00085918	0.000655966	8.68619e-05
RP11-299L17.3	1.62108	0.345167	0.050707	5.27399e-35
RP11-185E8.1	1.15041	0.672088	0.0190316	2.35495e-21
RP11-155G14.6	3.92957	0.719049	0.486333	8.60941e-26
AC005789.11	0.727903	0.228148	0.138276	1.49693e-09
RP11-713M15.2	0.670794	0.364994	0.0276413	2.06943e-38
LGG_LOC043626	0.679494	0.139606	0	1.80122e-29
RP3-460G2.2	3.1785	0.516316	0	3.52143e-38
RP11-804A23.4	0.670524	0.129292	0.125377	3.10397e-13
MEOX2-AS1	4.89686	0.0384048	0.0509122	2.69503e-32
RP1-167F1.2	0.391989	0.818762	0.0640848	6.51944e-12
RP11-791G15.2	1.10559	0.584079	0.136875	3.76591e-26
LBX2-AS1	1.34217	0.504187	0.111311	1.58291e-40
RP11-228B15.4	13.3775	5.0474	2.59613	2.86026e-36
RP11-104H15.9	1.71749	0.935163	0.203293	3.07384e-36
Cabili_2865	0.949276	0.579103	0.215096	5.08772e-16
PDCD4-AS1	2.435	2.67791	0.456425	4.2129e-38
FOXP4-AS1	0.721785	0.488811	0.0028923	1.01623e-28
RP3-369A17.4	1.70708	0.854751	0.0694416	2.13326e-25
RP11-264B14.2	0.605217	0.411286	0.0867911	4.1922e-17
RP11-1398P2.1	0.553656	0.362956	0.0389068	1.08078e-24
GBM_LOC000937	2.43487	1.28185	0.128361	3.30664e-29
IGFBP7-AS1	19.4724	12.5486	0.344659	1.17897e-37
RP11-452F19.3	9.08726	8.94525	1.93818	7.75835e-34
RP11-455B3.1	0.835166	0.614927	0.128842	6.45024e-09
Cabili_2928	0.678011	0.666634	0.117182	7.35784e-07
RP5-1085F17.4	11.3846	10.8657	2.83557	1.26376e-31
RP11-58K22.5	0.75642	0.907007	0.110523	1.59799e-13
RP11-806H10.4	1.37234	0.15996	0.00682441	3.56816e-39
CTD-2545G14.4	4.31541	3.09945	0	1.14314e-12
CTB-31O20.2	0.69773	0.180805	0.164497	5.46498e-24
Cabili_2499	1.40486	0.896985	0.296113	1.94113e-10
CTD-2012M11.3	1.51319	1.36753	0	3.71548e-22
LHX5-AS1	0.0107744	1.11495	0	1.83591e-05
RP11-973D8.4	4.08373	1.34543	0.43789	7.36347e-32
AC009892.10	1.03546	0.585254	0.239991	9.64499e-17
MIR4435-1HG	61.5814	2.94298	4.37212	6.97572e-32
RP11-220C2.1	0.330995	1.98444	0.0374967	1.6782e-09
LINC01506	0.729212	0.225693	0	3.42249e-32
Cabili_1679	1.31546	0.883255	0.260985	3.69121e-26
RP11-96L14.7	16.3854	5.598	4.03996	3.83586e-31
KANSL1-AS1	6.02886	4.55893	1.46274	1.31842e-17
RP1-86C11.7	0.678567	0.242117	0.142991	3.33881e-15
GBM_LOC049109	0.836495	0.111096	0	1.7e-23
MIR503HG	1.83388	1.45029	0.383462	2.31039e-17
RP11-521C20.3	2.32228	1.77285	0.290812	1.51068e-34
HCG15	0.57481	0.368653	0.0631864	1.05184e-26
HCG16	0.859685	0.464268	0.0170076	3.45041e-26
RP11-375N15.2	1.27483	0.6153	0.177849	1.40638e-27
ARHGAP31-AS1	0.537567	0.790929	0.0596152	7.09683e-25
CTB-46B19.2	1.11071	1.6946	0.0937972	2.68503e-25
RP11-100G15.10	1.96436	0.417591	0.169678	3.35773e-30
GBM_LOC001634	0.516595	0.23403	0.0567327	5.21649e-29
RP11-19E11.1	0.771946	0.0910151	0	4.4243e-39
Cabili_2748	1.94667	0.593465	0.278907	9.92359e-33
RP11-150O12.6	0.537236	0.213647	0	1.4339e-20
RP11-732A19.5	24.3771	15.6999	6.00679	3.27429e-17
DPYD-AS1	0.644944	0.352699	0.0806167	5.98653e-13
RP11-524D16__A.3	2.70722	0.275264	0.059037	4.11581e-34
GBM_LOC032111	0.261199	1.06011	0	0.0477198
RP5-901A4.1	1.70199	1.03226	0.343659	1.15928e-27
RP1-317E23.3	38.8109	16.909	7.96582	5.89354e-37
GBM_LOC026755	0.544872	0.163868	0.0586031	1.13594e-20
RP11-698N11.2	7.2821	2.42054	0.0818148	5.04452e-38
RP11-961A15.3	0.534504	0.302785	0.12404	1.56281e-09
RP11-284F21.7	62.6807	164.063	10.7424	1.21346e-25
RP11-1148L6.9	0.799609	0.335118	0.163427	1.66323e-23
RP3-466P17.2	1.14379	2.28574	0.142967	5.40139e-11
CTD-3252C9.4	4.05004	1.80124	0.962399	1.76796e-18
GBM_LOC037098	0.137209	0.570456	0	0.000445262
CH507-39O4.2	0.817982	1.00127	0	2.15025e-12
GBM_LOC021475	0.587598	0.157227	0.0636152	1.04145e-16
GBM_LOC048426	3.31748	0.404966	0	7.61981e-28
RP4-616B8.4	1.43187	1.09358	0	5.5133e-20
Cabili_394	0.452804	0.664728	0.0554341	4.02913e-11
RP11-15I11.3	0.399883	0.608343	0.00286942	2.31039e-17
RP3-510D11.2	0.971506	0.197827	0.0665234	3.46979e-25
LGG_LOC047270	0.874125	0.436922	0	1.95099e-34
LINC01426	0.879378	0.098213	0.0106799	6.44498e-41
AC064875.2	3.27175	0.179857	0.618112	6.67667e-14
LINC01268	2.13605	2.00357	0.387256	8.60453e-21
CTD-2616J11.2	2.60654	1.57346	0.515564	1.6e-21
RP11-22P6.3	3.61883	2.15354	0.724307	1.5584e-20
MIR155HG	1.13416	0.135026	0.148295	3.62024e-23
Cabili_2530	0.837971	0.359014	0	1.17108e-17
LINC01358	2.82135	0.363401	0.0447675	1.01623e-28
RP5-912I13.1	0.88778	0.668251	0.203164	3.12438e-06
LINC01198	1.17476	0.14087	0.00165785	2.09765e-27
KLHL7-AS1	0.632992	0.664771	0.153746	1.28164e-13
RP11-589P10.7	1.03911	0.491361	0.238922	2.84299e-09
STEAP3-AS1	1.90075	0.339177	0.172104	3.18952e-32
RP11-148K1.12	12.075	9.40652	1.45371	1.28508e-32
SNORA76C	116.559	7.62665	2.1279	1.40344e-29
RP13-270P17.1	7.63001	1.68386	1.00703	3.46458e-34
XXbac-BPG55C20.7	0.574626	0.332383	0.0445168	1.74245e-15
NFIA-AS2	6.4511	5.43135	0.440267	5.33986e-37
RP1-65J11.1	1.65362	0.94312	0.172601	2.8723e-32
LINC00519	0.364364	0.852087	0.0515511	3.87118e-23
RP11-758P17.3	1.52346	0.677282	0.24323	2.26343e-11
RP11-480D4.6	0.501924	0.421246	0.0581071	1.55995e-15
AC017002.1	0.537767	0.0305537	0.00397144	3.2438e-36
RP1-198K11.5	1.72182	0.640638	0.238045	2.3256e-39
GBM_LOC028290	1.12654	1.61071	0	4.52218e-37
GBM_LOC028295	0.147972	0.562249	5.96688e-22	3.42851e-16
GBM_LOC028297	0.0571931	1.0347	0	5.69084e-25
MIR335	0.502437	0.222163	0.0640475	3.33299e-24
RP11-124N14.3	191.118	75.644	3.2075	8.26439e-44
AC007563.5	11.7498	2.08386	1.19787	7.94213e-20
RP11-156L14.1	1.84133	0.653335	0.421076	4.84606e-19
RP11-542C16.1	7.97368	8.77899	1.78709	7.36347e-32
RP11-247A12.1	1.21055	1.68771	0.170397	6.71159e-26
Cabili_1455	0.500049	0.903449	0	2.95281e-15
RP11-347E10.1	1.72355	0.517807	0.00252924	2.7073e-40
RP3-405J10.4	0.977907	0.900942	0.199323	2.79958e-17
RP11-219B17.3	0.591614	0.718389	0	2.23284e-26
AC078883.3	0.794122	0.282534	0.194703	2.24389e-15
RP11-420L9.5	4.39517	2.62659	0.529064	2.7073e-40
Cabili_2341	0.607194	0.801742	0	5.44899e-18
CH17-140K24.7	4.22243	1.64683	0.637992	2.28356e-15
CH17-140K24.4	0.89911	0.449784	0.18029	4.21898e-11
C21orf88	1.97998	1.04468	0.456543	1.05717e-14
RP11-452L6.6	0.582044	0.582146	0.0766609	1.88064e-28
AJ011932.1	0.722077	0.132468	0	3.08976e-29
CTD-2201G16.1	0.125646	1.5869	0	2.5971e-05
RP11-343H19.2	3.21518	3.95575	0.373925	4.30527e-22
GBM_LOC026351	1.31771	0.355271	0.19708	1.27014e-24
DARS-AS1	1.58032	1.06112	0.380589	1.43068e-28
RP11-414C23.1	0.925104	0.662743	0	0.000237824
CTD-2369P2.2	2.61705	2.22204	0.360056	2.19926e-33
HOTAIRM1	8.65803	0.689097	0.035415	8.49158e-39
CTD-2369P2.8	4.0097	1.07996	0.175169	4.45504e-35
HOXB-AS1	2.40157	0.182385	0.0343311	3.20969e-34
RP11-903H12.3	1.75583	0.385031	0.220015	7.75835e-34
CTD-2291D10.4	0.610033	0.809017	0.0818749	4.92571e-11
CTD-2196E14.5	0.651289	0.153317	0.12112	9.18212e-15
HOXC-AS1	0.834164	0	0	1.67605e-36
RP11-7I15.3	3.92665	1.00918	0.741823	7.38347e-17
CTD-2035E11.4	0.861221	0.179552	0.072678	1.29048e-21
RP11-849N15.3	1.3221	0.66246	0.288503	1.94211e-25
RP11-558F24.4	1.47314	0.148862	0.106612	1.67773e-34
GBM_LOC039120	0.483685	0.692975	0.0588224	6.26094e-21
GBM_LOC047199	0.0225445	0.74947	0	0.000453026
RP4-607I7.1	0.516199	0.294151	0.00507272	5.90634e-27
AC015936.3	31.5564	14.5719	3.29458	2.27543e-31
RP11-796E2.4	4.22096	2.8967	0.801589	2.18365e-38
CATIP-AS1	0.629715	0.20686	0.0961222	3.33881e-15
RP11-498E2.9	0.509269	0	0	7.44106e-21
GBM_LOC025944	0.657947	0.595929	0.13633	5.69276e-13
AC068499.10	0.887093	0.819702	0.140525	1.64691e-15
COL4A2-AS1	4.4549	0.435685	0.326517	8.43993e-38
RP11-38P22.2	8.75885	3.44016	1.77998	1.34705e-20
AC145343.2	0.65779	0.288314	0.116104	5.16112e-15
Cabili_457	0.515541	0.180411	0	1.95047e-26
RP11-686D22.4	0.653072	0.352425	0.154552	4.46612e-16
AC021188.4	1.3259	2.3862	0.160138	1.01623e-28
RP11-848P1.5	2.35538	1.85058	0.271676	6.3814e-28
RP11-848P1.3	3.05818	1.80302	0.591406	2.65711e-24
RP11-626G11.3	10.6985	6.49528	2.54931	3.83586e-31
Cabili_1953	0.824349	0.227259	0.103163	1.38661e-14
AC068535.2	2.5411	2.88384	0.226237	5.1834e-20
NDP-AS1	6.07138	4.18878	1.33997	5.03058e-21
LINC00152	54.6628	2.48481	2.99893	4.41839e-32
RP11-647K16.1	0.66104	0.382346	0.119862	8.21022e-14
Cabili_2195	1.3878	0.678108	0.309086	3.09064e-17
RP11-90P13.1	0.684021	0.640999	0.0748231	2.6781e-18
ADAMTSL4-AS1	1.2941	0.301232	0.258887	1.13095e-19
CTC-548K16.1	0.58089	0.0376634	0.0455091	8.60941e-26
CTC-548K16.5	5.35364	1.09515	0.612471	2.58811e-23
RP11-731F5.2	1.84946	0.399523	0.00594065	2.23346e-37
RP6-65G23.5	0.606159	0.200331	0.0583964	3.7556e-12
RP11-344B5.2	2.13553	1.7882	0.219898	3.95647e-23
CTD-2325M2.1	1.71431	0.640995	0.290442	5.60337e-29
RP11-290H9.4	0.564973	0.179101	0.107064	4.13753e-20
AC092675.3	1.95789	1.10353	0.0749627	4.21996e-33
PVT1	33.2769	9.00074	3.32758	9.74717e-14
Cabili_2293	1.43786	0.492884	0	1.9185e-23
AC147651.4	2.27031	0.594297	0.14673	4.41839e-32
RP11-1143G9.4	23.6454	3.41406	1.0583	4.57266e-34
MIR181A2HG	1.08408	1.04498	0.0574708	3.87415e-19
RP11-12G12.7	3.8516	2.3957	0.871668	6.63764e-29
SGOL1-AS1	0.754798	0.189743	0.082675	2.13326e-25
LIMD1-AS1	9.90431	5.62033	2.0449	6.28191e-32
RP11-498C9.13	26.5433	28.0079	3.33657	2.18365e-38
TBX2-AS1	6.14166	8.21591	0.294065	1.70224e-37
RP11-498C9.2	255.204	131.676	39.4523	3.14888e-35
RP11-818F20.5	0.60166	0.93498	0.0858194	1.53024e-32
RP11-545D22.1	0.542443	0	0	0.000138616
FOXD2-AS1	0.769085	0.262725	0.0951464	4.21996e-33
FOXD3-AS1	6.91097	1.02533	0	1.58291e-40
RP11-756G20.1	0.495496	0.512227	0.0481067	3.46979e-25
BX470102.3	0.61102	0.147827	0.099361	1.89879e-19
RP11-91P24.6	0.458293	0.546294	0.101362	3.87415e-19
CTD-2006C1.2	5.50339	3.83587	1.24066	8.60941e-26
CTD-3128G10.7	1.04733	0.22754	0.100029	5.87718e-17
CTD-3128G10.6	2.05556	1.19445	0.262935	4.91394e-39
LINC01146	0.55333	0.0826883	0.0725226	1.54277e-17
RP11-879F14.2	0.886243	0.342352	0.174765	2.64529e-23
SMAD1-AS1	14.3974	13.3066	3.15856	1.50078e-27
RP11-60A24.3	0.888565	0.483658	0.178386	1.83571e-14
UBE2E1-AS1	0.934217	0.670918	0.134558	2.14634e-35
RP1-313I6.12	0.835331	0.561484	0.149644	1.32088e-20
AC034228.3	1.09286	2.07343	0.263361	1.0896e-11
FAM181A-AS1	5.08953	0.680867	1.21669	1.91034e-18
RP11-31F19.1	5.54671	6.21129	1.03789	1.97183e-15
AC079742.4	48.5724	28.0317	9.63588	1.30075e-35
RP11-701H24.7	0.199948	0.581633	1.59498e-08	0.0013461
CTD-2201E18.3	1.84197	1.47423	0.446379	3.37195e-21
GNAS-AS1	3.0354	0.417484	0.13979	4.41839e-32
CTD-2267D19.3	1.31943	0.551152	0.281942	1.56764e-18
CTD-2026G6.3	0.451368	1.30481	0.0455083	0.000716536
RP11-1334A24.6	1.00248	0.344673	0.209187	8.10616e-15
U91328.21	2.18134	0.890753	0.294048	1.81525e-23
AC092687.5	0.443986	0.789946	0.0705337	8.9245e-13
LGG_LOC039280	0.633166	0	0	3.52888e-26
RP11-127L20.5	8.79008	6.00243	1.60404	4.10368e-27
CTB-147N14.6	3.30297	1.906	0.204239	4.55045e-31
MGC32805	0.340947	0.514155	0.0767926	1.33344e-16
GBM_LOC004789	0.940343	1.72997	0.228147	1.80468e-13
CTC-467M3.2	0.902363	1.08586e-41	0.194681	0.0052921
Cabili_1401	0.789324	1.09246	0.10198	5.79021e-18
CTD-2510F5.4	5.612	1.89996	0.633669	2.23346e-37
RP11-145M9.4	6.91792	4.42423	0.178878	6.41055e-24
Cabili_152	0.598448	0.231267	0	1.70224e-37
RP11-219E7.1	0.680288	0.495092	0.127474	8.07984e-13
RP1-69D17.3	0.658143	0.15323	0.144107	4.25566e-09
RP13-20L14.6	1.38653	1.05656	0.144323	1.29595e-23
LINC01158	62.3769	42.9859	14.0364	1.78451e-19
LINC01150	1.39646	0.687023	0.0332286	2.65711e-24
LINC01152	1.69867	1.22269	0.372767	3.08976e-29
AC053503.6	0.809436	0.0363771	0.0597519	5.44899e-18
Cabili_276	0.616648	0.200989	0	4.04269e-22
SNHG5	140.789	113.595	29.5978	1.17374e-22
AC034243.1	0.764095	0.224926	0.0685169	3.79322e-15
AC093620.5	0.623332	1.32028	0.0541244	2.91635e-19
RP11-326C3.12	0.796566	0.619297	0.0845918	1.1994e-22
HOXA-AS3	0.585198	0.000659478	0	1.03013e-39
HOXA-AS2	2.66216	0.0221412	0	1.58291e-40
RP11-255H23.4	1.11942	0.831586	0.219903	5.4679e-16
ST7-AS1	2.3512	2.85401	0.337784	1.26273e-33
LINC00998	58.71	39.8508	12.7141	1.5162e-36
OOEP-AS1	0.735719	1.11088	0.0501954	5.35571e-24
RP11-11N9.4	2.87531	2.09932	0.571156	2.06134e-13
RP11-322E11.5	0.818578	0.187144	0.0640531	2.28052e-24
MIR210HG	7.54205	1.86798	1.64166	7.61463e-22
CRNDE	15.824	1.76666	0.355203	2.36295e-34
SNHG18	4.82036	0.623254	0.59007	1.34705e-20
GBM_LOC002313	5.9063	1.65165	0.029902	2.18365e-38
CTD-2540B15.11	23.3559	15.8856	5.05499	1.2467e-22
ELMO1-AS1	0.378068	1.59751	0.0338511	3.9679e-17
CTD-2265O21.7	3.52077	1.83998	0.339608	1.68405e-30
CH17-340M24.1	1.08816	0.413864	0.141846	8.60941e-26
RP11-259K5.2	0.973266	0.687203	0.183638	3.13012e-26
RP11-61L19.2	0.558685	0.203106	0.13806	1.64691e-15
CTB-167B5.1	1.65554	1.16438	0.0705063	1.35241e-33
RP11-44N11.3	0.418784	1.08316	0	5.37872e-08
RP11-203M5.8	11.4237	6.4231	1.60271	1.99445e-37
RP11-442H21.2	86.4074	122.115	21.479	9.60792e-24
GBM_LOC047393	0.733774	0.728226	0.160123	1.41638e-13
LINC01235	1.94508	1.24106	0.120061	1.50078e-27
RP4-545L17.11	1.80536	1.67775	0.0658089	1.27941e-11
RP11-305L7.6	0.917453	0.147113	0.20458	2.30164e-07
Cabili_319	0.616603	0.383012	0.0898922	1.00726e-25
YTHDF3-AS1	2.11906	1.96454	0.330554	6.50492e-25
RP11-181C3.1	1.12768	1.31552	0.203443	1.33418e-18
ZMYND10-AS1	0.825205	0.425534	0.19447	2.80529e-13
CTC-255N20.1	0.483374	0.68294	0.0770004	5.69084e-25
RP11-512N21.3	0.526061	0.181834	0.0471521	7.75835e-34
LINC00475	0.624429	0.0611173	0.0138794	6.20206e-29
GBM_LOC003055	0.877345	1.62056	0.18655	1.79786e-10
CTB-178M22.2	1.87054	2.30537	0.413506	3.12042e-15
RNU11	3.08446	2.78982	0	0.000697837
RP11-838N2.4	0.739792	0.0811248	0.00515256	6.28191e-32
AC069363.1	0.869962	1.6152	0.156438	9.02381e-10
GBM_LOC018715	0.601368	0.0752943	0	2.31663e-27
RP11-185E8.2	3.20714	3.37447	0.727719	3.99905e-24
RP11-834C11.4	12.0245	4.30426	0.722141	3.2438e-36
RP11-834C11.5	1.86282	0.380271	0.2673	5.98056e-17
AC010761.10	35.1635	16.7474	4.91208	6.50492e-25
RP11-231C18.2	0.0892658	0.955957	0	0.000200597
C14orf64	2.42663	2.43547	0.554167	3.76591e-26
CTB-113P19.1	0.546007	1.00889	0.0429703	9.31127e-34
CTA-384D8.34	0.679184	0.167157	0	1.74162e-21
CTB-193M12.5	8.55158	2.04162	1.27749	2.94233e-25
CTD-3049M7.1	12.6163	0.294566	0.570298	4.4243e-39
RP11-332M2.1	4.74784	2.84078	1.07694	7.76941e-28
RP11-307C19.2	0.803959	1.15302	0.19074	3.33881e-15
LINC00511	42.6369	44.9354	6.59485	3.19347e-28
LGG_LOC001868	2.49166	1.46418	0.52388	2.59984e-35
ARSD-AS1	9.81168	2.3686	2.14051	5.85959e-24
LINC00669	0.89824	0.0235507	0.036521	1.08985e-27
RP11-286H14.8	9.63265	5.33508	0.716673	1.44923e-39
LINC01224	0.802253	0.140254	0.0988442	6.77016e-15
CTB-51J22.1	4.81081	1.26949	0.535597	3.04249e-30
AC093673.5	23.9591	7.53588	3.54736	1.35241e-33
RP11-446N19.1	0.787759	1.07875	0.105716	1.51473e-19
WARS2-IT1	0.639314	0.398046	0.0146359	7.90836e-26
RP11-536O18.1	0.581754	0.442848	0	9.43926e-26
RP11-390F4.6	2.67553	2.16403	0.519145	1.80797e-25
CTD-2342J14.6	0.774525	0.515327	0.146777	1.9738e-22
AC092580.4	0.656945	0.206732	0	1.32233e-23
RP11-122C5.3	0.430159	0.525746	0	4.55045e-31
PCED1B-AS1	29.1812	11.1763	1.92945	1.7778e-26
IQCA1-AS1	0.349284	0.594705	0.0229351	1.309e-19
CTD-2193P3.2	0.243454	0.824803	3.83024	1.76976e-20
RP11-123O10.4	0.00228386	1.08501	1.20092	3.75155e-21
RP11-219A15.4	0.931125	0.991722	3.80445	3.14035e-12
GBM_LOC036475	0.0637821	0.206736	0.515913	5.08772e-16
RP5-1104E15.6	0.0354899	0.103931	0.598499	1.88835e-24
MEG9	0.600823	0.351625	2.49505	1.92646e-13
MEG8	0.509959	0.359777	3.27015	4.99478e-24
RP11-454H19.2	0.400815	1.36073	1.92112	1.45695e-22
RNF219-AS1	0.54964	5.57674	2.87527	5.55377e-11
LGG_LOC007949	0	0.283884	1.09425	1.17602e-13
RP1-301L19.1	0.197886	0.396314	1.13278	1.74736e-07
RP11-566K19.6	2.49524	3.06327	14.9233	1.61202e-26
RP11-494H4.3	0.114745	0.160414	0.532083	5.81854e-12
GBM_LOC003131	0.0847827	0.127301	0.744517	4.53059e-28
RP11-561O23.8	0.244575	0.453517	1.53966	4.22536e-15
LINC00202-1	0.129163	0.222843	2.10413	3.72164e-35
INHBA-AS1	0.0720637	0.407917	0.932966	4.24599e-21
SNHG24	0.11943	0.086191	0.581452	3.59117e-18
Cabili_1166	0.0460091	0.155411	2.00617	5.71908e-11
RP11-4K16.2	0.0466231	0.113772	1.89501	4.05345e-18
AC131056.3	0.426497	1.31353	2.42576	7.59453e-11
FZD10-AS1	0.242334	0.544045	1.0155	1.81305e-11
RP11-297M9.2	0.148446	0.684466	3.71294	5.95038e-19
DLX6-AS1	0.411701	0.376948	2.32683	4.5526e-06
RP11-446H18.6	0.275741	0.589776	1.32966	6.72321e-17
RP1-78O14.1	0.156718	0.297955	4.86576	1.69164e-31
FLJ33534	0.120012	0.133451	1.72319	5.35812e-18
RP4-621B10.8	0.455825	1.18192	3.4815	1.51068e-34
CTD-3116E22.7	0.131731	0.32151	0.678821	9.82923e-25
DCTN1-AS1	0.165851	0.42955	5.28221	1.43068e-28
RP11-173C1.1	0.277095	0.239062	1.41186	2.24246e-20
RP11-304L19.3	0.593116	0.706721	2.44382	6.67084e-16
RP11-467K18.2	0.0453056	0.0770474	0.821855	2.38258e-29
RP11-547D24.1	0.0697303	0.434261	0.714092	7.93575e-22
RP11-193F5.1	0.0565134	3.50822	0.39601	1.68505e-06
RP11-797D24.4	1.19849	5.63545	12.1014	1.07313e-22
RP11-271F18.4	0.00309934	0.10341	1.55795	2.19926e-33
RP11-382B18.4	0.368022	0.706049	1.47436	9.10915e-16
RP4-593C16.4	0.206677	0.367632	2.23244	5.9763e-34
MIR219A2	0.819109	7.19559	3.94859	7.44452e-07
RP11-946L20.2	0.0603894	0.169029	0.661874	1.65507e-09
CTD-3234P18.2	0.260591	0.487072	1.31774	1.15757e-24
MIR137HG	0.184912	0.205576	2.02523	7.2672e-29
MEG3	27.6214	31.4108	281.195	4.77148e-25
LL22NC03-2H8.5	0.125522	0.517941	0.745995	8.93164e-17
RAPGEF4-AS1	0.069217	0.0863026	0.520227	3.03022e-14
CTD-2020K17.3	0.899696	1.31212	3.92246	4.40139e-20
SLC25A21-AS1	0.134909	3.35352	1.00395	4.39239e-22
RP11-574K11.5	9.78393	24.3289	40.6673	3.81814e-25
RP5-1028L10.1	0.154381	0.544102	11.7498	7.36347e-32
RP11-1055B8.3	0.784698	3.99054	5.98958	1.05987e-13
RP11-17J14.2	2.47947	7.76031	11.1484	3.01434e-20
RP5-1160K1.8	0.0548542	0.239204	2.04409	1.53024e-32
AC083843.4	0.132679	0.219002	0.543662	8.4477e-16
PWAR6	3.00115	13.6509	48.9325	2.175e-36
RP11-499A10.3	0	0.0486632	1.19039	5.27399e-35
RP13-895J2.4	0.0387627	0.0683509	0.59458	3.67333e-21
RP11-958J22.1	0.00241335	0.104027	1.79489	2.42706e-32
RP11-216L13.18	0.0832809	0.166538	0.655926	3.67773e-17
RP11-752G15.3	0.114292	0.248335	0.985256	2.23346e-37
RP11-783K16.10	0.38703	2.06454	2.17125	8.25922e-18
GBM_LOC047602	0.0642397	0.153896	1.01108	9.25143e-22
CTD-2058B24.3	0.121442	0.380008	1.08741	7.87449e-23
RP11-690D19.3	5.06526e-08	0.875211	2.48324	2.86026e-36
LGG_LOC034728	0.149697	0.37329	0.669396	1.03846e-14
RP11-50D16.4	0.0850499	0.154858	0.725024	1.89846e-13
MALAT1	40.4083	53.2469	233.072	8.34447e-25
RP11-203F10.5	0	0.0611551	0.512468	5.23828e-25
GBM_LOC007438	0.0373395	0.0703314	0.641248	3.42249e-32
RP11-266L9.5	0.120176	0.326592	0.676369	4.78481e-26
CYP4F35P	0.148049	0.272126	2.70592	1.53676e-18
SNCA-AS1	0.0675352	0.102955	0.657312	1.32088e-20
GBM_LOC005589	0.0504691	0.615131	0.971248	8.59559e-35
RP11-433J8.1	0.0635012	0.131601	1.77511	5.57699e-25
AC008079.10	0.143025	0.19446	0.710249	1.62368e-14
Cabili_2104	0	0.101037	0.533876	2.48356e-22
GBM_LOC030696	0.0443247	0.194235	0.877428	1.70967e-21
Cabili_1756	0.25476	0.837261	1.84998	1.97183e-15
LINC00643	0.887513	4.25969	10.3793	4.97824e-15
LINC00641	4.12598	15.3597	27.989	3.72164e-35
AC016910.1	0.160529	0.519308	1.39188	2.15149e-29
RP5-1119A7.17	0.0987629	2.59744	4.2591	4.30527e-22
RP11-17L5.4	0.00236346	0.0991093	3.30569	3.04249e-30
RP11-299G20.5	0.340103	1.86074	1.50188	4.97824e-15
GBM_LOC015463	0.0679195	0.172494	0.567514	1.20377e-28
RP11-805F19.3	0.0121539	0.0869125	0.617185	9.30542e-19
XLOC_038422	0.0525871	0.0447073	0.662674	1.9185e-23
RP11-344P13.6	0.126942	0.216003	0.841946	8.60528e-16
GBM_LOC013924	0.09795	0.251964	0.542017	1.84741e-22
RP11-21A7A.2	0.955634	6.22024	4.08894	4.77932e-20
RP11-507K2.6	0.146303	0.426577	0.971287	1.07143e-31
RP11-844P9.1	0.023755	0.0383953	2.10636	7.75929e-21
C1orf220	0.148062	0.333386	0.730995	5.26776e-23
RP11-44N21.1	0.202004	0.484698	2.38735	2.14467e-30
AC131097.4	0.285637	0.461603	1.54597	1.37384e-12
LINC00936	0.907368	1.04021	4.3475	2.23205e-23
LINC00622	0.371825	0.538797	3.40319	9.86391e-28
RP11-684N3.1	0.0645089	0.430891	3.50149	2.14467e-30
RP11-81K13.1	0.00257148	0.0342769	0.564617	4.55007e-36
RP11-466A19.1	0.0507428	0.0815721	0.530755	1.15928e-27
AC003102.3	0.188844	0.569978	0.883917	1.09991e-23
DEAR	0.228974	0.192066	1.15326	8.9245e-13
RP11-180N14.1	0.50583	0.413953	2.26856	1.02177e-11
RP11-111M22.5	0.18441	0.503949	1.54655	2.42706e-32
CTD-2228A4.1	0.0197067	0.372058	3.31025	3.54216e-23
AC123886.2	0.196386	0.497368	3.02843	8.991e-20
GBM_LOC004447	0.00615098	0.0264363	0.906839	4.46202e-26
RP11-863P13.5	0.0995903	0.141637	1.79313	1.51312e-17
LA16c-329F2.1	0.0840438	0.333773	2.26019	2.92583e-26
RP5-875O13.1	0.0681129	0.0806151	0.697792	5.85159e-22
RP11-18J9.3	0.0426916	0.576989	0.695956	7.09683e-25
LINCR-0002	0.292233	0.104067	1.56915	6.24429e-06
RP11-96C23.5	0.129046	0.20045	0.605163	3.23581e-27
RP11-845M18.6	0.0323737	0.077272	0.742911	6.77998e-30
CTD-3064H18.4	0.11048	0.641175	0.466469	6.26845e-18
GFOD1-AS1	0.417924	1.07202	2.68836	8.64763e-14
LINC01476	0.00810258	0.0399841	2.9128	1.26693e-29
Cabili_1742	0	0.198866	0.771737	7.45082e-19
RP11-98D18.1	0.51581	2.56248	6.12933	7.09683e-25
RP11-147L13.8	0.100134	0.22311	0.739297	4.0648e-25
RP11-586D19.1	0.0749435	0.19351	1.12441	1.24372e-17
RP11-656E20.5	0.231942	0.293268	1.02259	1.7692e-27
Cabili_2690	0.0119266	0.0257634	0.800558	2.15149e-29
Cabili_2693	0.12892	0.760283	0.537011	1.84959e-12
RP11-301G7.1	0.0493981	0.088105	0.816963	5.36721e-16
CTD-2303H24.2	5.20845	9.21283	21.3899	1.06699e-20
RP11-145P16.2	0.00173939	0.0861452	1.84648	2.175e-36
RP11-384O8.1	0.565099	0.513904	3.14891	1.41638e-13
RP11-147L13.14	0.212179	0.585719	0.916828	1.31842e-17
Cabili_1927	0.165964	1.07895	1.69619	1.15928e-27
CTA-228A9.3	0.549693	0.570184	4.02117	3.45361e-27
RP11-677O4.6	1.2552	0.438759	6.09856	3.28341e-15
RP11-128N14.5	0	0.389513	0.770159	2.45273e-12
RP11-430B1.2	0.308665	0.346351	1.27196	2.94718e-16
CTB-12A17.2	0.115512	0.449327	1.01259	2.43192e-23
RP11-46H11.3	0.101591	0.562891	0.708642	1.00097e-20
SLC6A1-AS1	0.288009	1.06527	1.61713	3.96252e-22
LINC00320	1.52643	6.43782	8.91403	2.53458e-14
RP11-192H23.8	1.01879	1.30692	4.61443	3.35987e-19
Cabili_1293	0.185631	0.294565	0.891698	3.03022e-14
RP11-245J24.1	0.0806789	0.740517	1.69917	1.36344e-22
CTD-2298J14.2	0.0299171	0.237786	0.946678	1.00565e-22
KB-1517D11.4	0.0531032	0.153564	1.55854	1.63082e-17
RP1-63G5.5	0.0979062	0.755271	1.05618	2.43741e-16
RP11-531A24.5	0.14035	0.248708	0.605965	9.26086e-14
RP11-531A24.3	0.0166289	0.0973452	0.790063	1.63082e-17
LINC01007	0	0.0161352	3.00856	7.7897e-20
Cabili_1765	0.141748	0.272971	0.629436	2.85405e-17
RP11-573G6.6	0.188307	0.296141	0.962148	2.93059e-27
RP11-463C8.7	0.101587	0.574615	0.920337	8.60941e-26
RP6-65G23.3	0.683349	0.840716	4.97349	4.59026e-24
LGG_LOC031272	0.0778096	0.328257	0.548612	1.26335e-21
RP11-466M21.1	0.165016	0.286336	4.40244	2.48356e-22
RP11-95O2.5	0.850017	2.40852	14.9649	2.23284e-26
LGG_LOC021000	0.365322	1.57598	2.06781	2.51102e-25
CTD-2176I21.2	0.232652	1.31913	6.51771	4.59128e-22
RP11-710C12.1	0.198894	0.324617	2.19062	5.83726e-20
RP11-290F24.6	0.424845	1.05157	2.64816	1.18296e-31
CTB-152G17.6	0.387472	1.13052	1.61503	4.47558e-19
RP4-791M13.5	0.171046	0.429275	0.898296	7.2672e-29
RP4-791M13.4	0.192465	0.337732	0.825175	9.82923e-25
LINC00672	1.76968	10.2025	8.897	2.62745e-16
LINC01260	0.163487	0.484157	1.59393	2.48356e-22
RP11-482H16.1	0.402792	1.64628	2.8694	4.40139e-20
GBM_LOC029519	0	0.0123594	0.961535	1.6e-21
CH507-528H12.1	0	3.44714	0.0266364	1.33544e-09
ISX-AS1	0.00407913	0.66181	0.0500903	2.1328e-09
CTD-2168K21.2	0.152318	0.320253	2.41947	9.52246e-13
RP11-508N22.12	0.079155	0.348824	0.648566	4.45504e-35
CTC-344H19.4	0.150454	0.19077	1.30801	2.58811e-23
Cabili_2534	0.26943	0.546585	2.94035	8.991e-20
GBM_LOC005382	0.125196	0.341832	0.560433	6.5483e-16
RP11-285F16.1	0.538901	2.94505	2.79218	3.23814e-25
RP11-214K3.19	0.101332	0.185471	0.612814	6.5483e-16
RP11-434B12.1	0.723669	1.61101	9.35878	2.53941e-29
RP4-809F18.2	0	0	0.617437	2.42288e-24
RP11-71H17.7	1.36726	2.08857	7.35534	1.15059e-17
RP11-74E22.8	0.974252	6.25555	4.66162	5.36721e-16
RP11-64K12.10	0.162807	0.569595	2.88323	8.88583e-27
RP11-317G6.1	0.151104	0.691819	1.25587	2.58811e-23
CELF2-AS1	0.0480582	0.212087	0.709468	9.86391e-28
RP11-75I2.3	0.467977	2.36114	7.10306	1.84741e-22
RP1-293L6.1	0.072211	1.57212	0.838762	1.17824e-15
RP1-138B7.5	1.44573	2.5887	6.0384	4.99478e-24
AC084809.3	0	0.0526116	0.620331	4.50892e-23
AC084809.2	0.0907811	0.26061	0.542065	2.16678e-21
C21orf128	0.0378341	0.116194	0.766015	1.8677e-17
RP11-370I10.11	0.174534	0.412873	0.729761	2.74158e-19
AC011995.1	0.0103458	0.051949	1.22101	9.25143e-22
RP4-541C22.5	0.520249	1.25478	4.86928	1.52378e-31
RP1-212P9.3	0.279152	0.293912	1.72643	2.15391e-18
RP11-227B21.2	0.210803	5.19258	7.91852	2.93059e-27
TUNAR	0.193438	0.623253	8.4764	3.23403e-31
RP11-13K12.5	0.164987	0.294934	3.02122	8.57227e-19
FAM201A	0.107276	1.05442	1.60997	7.26211e-17
RP1-253P7.4	0.452327	1.17149	1.86585	3.87415e-19
RP11-262I2.2	0.00428212	0.211924	0.723073	6.33807e-27
RP11-894P9.1	0.992042	1.26306	4.85398	2.8723e-32
RP3-414A15.2	0.0876181	0.114807	0.565617	2.23284e-26
RP11-519G16.2	0.294629	0.772201	1.34997	3.28341e-15
LINC01106	0.0610869	0.129681	2.66644	5.57699e-25
RP11-439M11.1	0.0487476	0.084507	0.844877	1.4339e-20
GBM_LOC002416	0.309584	0.65273	2.66732	5.37736e-28
GBM_LOC031448	0.0767094	0.174294	0.536203	3.50399e-20
RP11-355I22.2	0.311175	0.946806	6.56105	1.51068e-34
RP11-700H6.4	0.0581722	0.257837	0.554789	7.93575e-22
DLEU2L	0.126449	0.163332	0.61009	8.34105e-28
ACAP2-IT1	0.157914	0.341806	1.08141	6.25672e-22
RP11-1299A16.3	0.180923	0.352064	0.926551	2.50256e-21
LY86-AS1	0.1485	0.312274	4.07655	9.6421e-16
IDI2-AS1	1.28841	2.10972	5.34511	2.34514e-22
RP11-575F12.3	0.238273	0.440036	1.07642	8.25922e-18
AC079305.11	0.00983401	1.17423	0.102786	0.000851349
GBM_LOC014772	0.0438354	0.0546275	0.578689	1.26376e-31
RP1-46F2.3	0.0939682	0.090693	1.08059	5.47151e-11
RP11-923I11.3	1.53861	3.00685	18.1685	4.07857e-32
MIR7-3HG	0.817375	1.48316	9.21279	8.21022e-14
RP11-168K9.2	0.000533133	0.007928	0.601005	7.4507e-33
DLGAP1-AS3	0.0509988	0.395191	0.988413	8.00208e-24
DLGAP1-AS4	0.206865	0.410742	9.23236	5.37736e-28
RP11-1084A12.2	0.0850925	0.555502	0.367353	1.18169e-10
CTD-2269F5.1	0.485071	1.38067	2.15245	2.32301e-10
RP11-298D21.1	0.4286	1.03626	2.5661	4.71743e-08
RP1-239B22.5	0.495654	1.21839	2.72664	2.92583e-26
RP11-573G6.4	0.15298	0.25337	0.668389	2.94233e-25
Cabili_2875	0.827411	1.19336	3.39539	6.14678e-18
RP13-895J2.8	0	0.297585	2.27826	8.63936e-29
PWAR5	0.104719	1.08921	1.42828	2.93059e-27
RP13-895J2.2	0.0208049	0.060916	0.696826	4.99478e-24
RP13-895J2.7	0.0582097	0.301284	5.33314	8.13984e-30
Cabili_392	0.470858	1.28736	6.90819	3.83586e-31
RP11-303E16.5	0.285865	0.363194	1.20242	1.64505e-19
AP002954.3	0.159839	0.3127	1.18702	3.98126e-30
RP11-44N21.4	0.0896587	0.24194	1.53849	4.07857e-32
LGG_LOC000040	0.109513	0.481157	1.09431	3.35987e-19
RASGRF2-AS1	0.116976	0.208491	1.66907	3.73561e-18
RP11-446F17.3	0.241836	0.985448	2.22319	4.59026e-24
RP11-261N11.8	0.0245184	0.171206	0.622403	1.02802e-23
RP13-514E23.1	1.10249	4.80631	8.88008	2.05898e-20
RP5-827C21.2	0.00699675	0.0235142	0.80053	3.23403e-31
RP11-245P10.4	0.0567368	0.185535	0.84103	5.00827e-28
AC000403.4	0.180168	0.197771	0.916374	2.50256e-21
TMEM191A	0.561978	0.318305	4.08653	5.26776e-23
RP11-123M6.2	1.27181	0.899765	26.962	1.80048e-30
AC159540.1	4.52731	6.07265	19.6604	4.47558e-19
AC159540.2	0.682708	1.17456	3.00284	2.15391e-18
RP11-696P8.2	0	0.0939177	2.83523	3.10214e-19
STXBP5-AS1	0.381657	0.826169	4.61527	7.66393e-17
RP11-886D15.1	0.154449	0.3196	1.19549	3.10397e-13
RP11-346C4.3	0.0574293	0.454809	1.18518	9.31127e-34
MIR4500HG	0.233742	0.637215	3.98626	3.45361e-27
RP11-369E15.3	0.0795438	0.150585	1.36302	1.07156e-12
RP11-662M24.2	0.817522	4.33171	47.845	9.00176e-33
CTD-2560E9.3	0.326531	0.971612	1.6928	1.70583e-28
GBM_LOC030529	0	0.016085	0.711223	5.07784e-20
AC009487.4	0.0292923	0.0748924	1.69908	6.81513e-22
AC009487.5	0.156771	0.455407	7.56898	5.57699e-25
Cabili_1462	1.12227	2.15065	5.61614	1.24815e-26
RP11-539I5.1	0.321713	0.104058	1.98598	1.70541e-12
GRM5-AS1	0.416698	2.20469	14.7941	1.75607e-34
RP11-665J16.1	0.0894773	0.0510292	0.507404	1.43773e-10
LINC00594	0.0903128	0.532963	3.41676	4.74383e-32
RP11-799B12.4	0.84626	1.11449	3.8583	1.15928e-27
LINC01197	0.531877	0.377108	2.49517	1.64505e-19
RP11-673C5.2	0.119543	0.178761	3.57823	2.06607e-32
RP11-839G9.1	0.415029	1.0517	2.59299	8.0038e-16
Cabili_720	0	0	0.517638	7.75929e-21
RP4-765H13.1	0.000901197	0.0024933	0.649838	4.53005e-27
RP11-520H14.7	0.148614	0.256267	1.04309	1.18296e-31
LINC00599	0.90369	4.1891	29.1757	1.4718e-21
RP11-4N23.4	0.305124	1.67901	24.3991	2.43122e-31
Cabili_2084	5.59605	31.8156	62.2558	6.68421e-21
RP11-597M12.1	1.2057	5.65682	28.1305	1.7692e-27
AC011288.2	0.00232752	0.0519633	0.571065	2.02893e-13
LL22NC03-13G6.2	0.0180343	0.0183514	0.721199	4.69283e-20
RP11-680F20.11	0.127467	0.892645	1.71341	4.14212e-31
LA16c-380A1.1	0.442545	1.36278	2.69842	2.42288e-24
CNTN4-AS1	0.0436624	0.100425	0.556737	4.50892e-23
RP11-254A24.2	0.00905705	0.0858194	0.538448	2.23205e-23
RP6-91H8.1	0.00368659	0.00943273	0.683295	4.53059e-28
RP6-91H8.5	0.0144513	0.0298729	1.02243	1.06892e-29
GBM_LOC000714	0.019193	0.0569634	0.987398	6.0843e-25
RP13-238F13.5	0.097952	0.490847	0.549465	1.23677e-10
RP1-232L24.3	0.453678	1.14623	2.48394	9.84414e-11
RP11-495O11.1	0.294984	0.867323	1.55343	4.00138e-21
RP11-33M22.2	0.039468	0.089464	0.75701	2.14467e-30
RP11-353N14.4	0.203715	0.283676	1.03307	1.81305e-11
RP11-490N5.3	0.165714	0.256385	0.773216	4.54853e-15
RP13-977J11.3	0.0582158	0.181515	0.690596	4.13881e-16
RP11-407G23.7	0.405619	0.609885	2.23982	6.39191e-22
DGCR9	0.603723	2.45857	4.51944	1.87279e-18
DGCR5	2.36093	5.49776	11.0382	1.50649e-18
CTD-2062F14.3	0.824111	0.60938	4.29366	3.30701e-23
RP5-1063M23.1	0.0396321	0.0396068	0.509926	2.89292e-18
RP11-676J15.1	0.407187	2.5714	3.28458	8.62041e-09
Cabili_1079	2.92996e-06	0.691674	2.18234	1.91249e-12
MIAT	1.48925	4.38102	44.1767	3.69121e-26
RP11-140A10.3	0.390663	1.29139	5.22248	1.00518e-38
Cabili_1257	0.0315483	0.0348056	1.53276	2.84177e-18
RP4-561L24.3	0.487465	0.838671	2.83807	7.75835e-34
RP11-4N23.1	0.0674538	0.26049	3.68829	5.43581e-36
CTD-2527I21.9	0.156151	0.780635	0.661133	9.46348e-17
Cabili_1474	0.094798	0.141146	0.504028	1.17602e-13
RP4-719C8.1	0.173339	1.06923	0.999448	2.5758e-10
CTD-2527I21.5	0.0136791	0.0289661	0.535334	1.15928e-27
LINC00507	0.031391	0.0290552	6.92023	8.00208e-24
RP11-845C23.3	2.91652	2.97834	14.5891	2.6781e-18
KB-1742H10.3	0.189238	0.243158	0.814909	1.01982e-15
RP11-260A9.6	0.00287925	0.0974648	0.687665	3.2529e-14
AC002550.5	0.118443	0.152952	0.604198	3.3155e-18
RP11-429A20.4	0.0713441	0.0948977	0.943993	1.39439e-25
ZRANB2-AS1	0.362395	0.424697	1.90881	1.61202e-26
PP14571	0.210691	0.209178	2.08982	5.36405e-22
LGG_LOC005866	0.0244536	0.451813	0.563512	1.50078e-27
RP11-392E22.10	0.136767	0.550276	1.91673	7.86298e-16
RP11-392E22.12	0.189342	0.706035	2.24239	9.18212e-15
RP11-762H8.4	7.49609	7.37037	45.9575	7.75835e-34
GBM_LOC000655	0.0789059	0.402714	0.822512	1.36344e-22
GBM_LOC000128	0.0252477	0.176235	0.83384	6.38963e-35
Cabili_1858	0.20711	3.70226	1.5353	1.84554e-08
RP11-762H8.1	0.283888	0.460901	1.42774	3.98126e-30
RP11-261P13.5	0.137461	0.392927	0.695994	1.00726e-25
RP11-61L14.6	2.56668	8.59649	21.0885	2.68503e-25
RP11-345N11.1	0	0.296027	1.29527	3.87415e-19
CTD-2396E7.10	65.523	215.999	361.147	2.23871e-14
GBM_LOC017115	0	0	1.27683	4.74383e-32
GBM_LOC012332	0.0321323	0.162544	0.536949	1.01623e-28
RP11-809C18.3	0.339454	0.804358	3.35912	8.93164e-17
RP11-269C23.4	0.291372	0.763956	1.27584	4.20854e-19
CTA-929C8.8	0.00166374	0.046463	0.551848	1.90701e-26
RP3-395M20.2	0.0203932	0.180047	1.35258	3.81092e-36
RP3-395M20.3	0.0263866	0.178015	1.38118	2.23346e-37
DGCR10	0.0860346	0.417456	1.28838	1.41128e-16
SATB1-AS1	0.598024	2.33752	3.87761	1.83571e-14
SPATA41	0.155815	0.360491	0.648619	4.92592e-21
RP11-863P13.6	0.0442046	0.119878	6.22914	7.7897e-20
LA16c-361A3.3	0.149576	0.269012	0.681594	9.17923e-23
RFPL1S	0.768106	2.07153	13.6563	2.23284e-26
HTR5AOS	0.0649303	0.187351	2.05433	1.98515e-16
Cabili_833	0.284605	2.03367	1.57715	2.53879e-10
SNORD64	0.071207	1.12144	1.58949	2.59557e-20
RP11-794G24.1	0.0445936	0.0464763	1.38156	4.55764e-33
AC007743.1	0.15373	0.403388	0.769639	3.15701e-21
RP11-234K24.3	0.103216	0.226608	2.41447	1.9185e-23
RP11-12M5.3	0.0220781	0.0733417	0.979924	3.17859e-22
RP11-66D17.5	0.433345	0.561447	2.45743	2.94233e-25
RP11-863P13.4	0.0670191	0.113749	1.46748	6.84799e-24
RP11-100M12.3	0.0632155	0.224813	2.67458	4.55045e-31
GBM_LOC007636	0	0.0731058	1.50787	1.5982e-24
LINC01511	0.035236	0.0404176	0.528862	2.12445e-11
CTD-3193O13.1	0.577541	0.465601	2.54161	1.62225e-12
RP11-680F20.9	0.205909	0.363915	0.943519	1.59799e-13
RP11-95O2.1	0.0445864	0.1576	0.969941	6.63764e-29
CTD-2349P21.5	0.129217	0.170982	0.577495	3.81445e-20
GBM_LOC025187	0.0100308	2.28564	0.396957	1.52332e-16
RP11-406H23.2	0.0853457	0.298209	0.58375	8.98093e-30
RP11-13K12.2	0.092354	0.0927109	0.713189	9.897e-12
RP11-13K12.1	0.0911189	0.118902	0.91221	2.43741e-16
CTA-373H7.7	1.11295	3.5522	28.9008	8.00208e-24
Cabili_1509	0.137687	0.159146	0.600156	4.86691e-12
RP11-497E19.1	0.0362987	0.0614389	1.22847	7.75835e-34
CTC-525D6.2	0.0207831	0.189117	0.581434	5.57298e-17
CTC-525D6.1	0.0516194	0.346954	1.01195	4.78481e-26
AC061961.2	0	0.12602	1.00182	2.28625e-25
GBM_LOC001601	0.0254279	0.11813	0.519412	2.65983e-33
RP11-359J14.2	0.199926	0.586049	1.95315	6.5004e-31
RP11-335O13.7	0.124911	0.0928963	0.684516	1.17108e-17
HCG11	0.430928	0.562937	1.90902	1.97183e-15
GBM_LOC014510	0.0376992	0.237903	0.566824	9.86391e-28
LA16c-360A4.1	0.113568	0.358942	0.51625	8.10616e-15
PAQR9-AS1	0.51302	0.630468	2.13279	3.13286e-11
RP11-822E23.8	0.224779	0.61804	1.87173	5.26668e-17
RP11-45M22.2	1.01734	1.923	4.87336	1.00726e-25
RP11-348N5.7	0.137505	0.490223	0.774844	4.73012e-29
AL132709.1	0.124881	0.0497888	0.719638	3.36763e-16
AC091878.1	0.0337399	0.225846	0.901908	1.9185e-23
RP11-169D4.2	0.321021	0.715883	1.65736	2.74764e-15
RP11-90M2.5	0.131118	0.30375	0.585443	2.13356e-16
CTD-2547L24.3	0.108518	0.10929	0.509646	8.74957e-18
RP11-789C17.5	0.501559	0.81931	2.45498	1.35132e-12
RNF144A-AS1	0.217481	0.265217	4.78758	9.82923e-25
Cabili_910	0.10405	0.419049	0.655475	3.49247e-13
GBM_LOC038375	0.0220158	0.0488125	0.504494	2.15391e-18
RP11-598F7.6	0.769643	1.09198	4.90707	2.42288e-24
RP11-267C16.1	0.194744	0.464415	1.21633	1.74301e-14
CTB-158D10.3	1.51978	5.21162	17.3302	4.10368e-27
RP11-215H22.1	0.0150937	0.11325	2.09444	1.5162e-36
DPP10-AS1	0.275763	1.65855	6.43424	1.89879e-19
RP11-272L13.3	0.04403	0.0579294	1.65118	4.93695e-34
GBM_LOC046481	0.0463573	0.122797	0.749549	1.003e-17
MYCBP2-AS1	1.95307	5.33831	12.7561	2.53941e-29
RP11-573D15.2	0.0911268	0.167257	0.570392	4.1922e-17
CTD-2562J17.4	0.0587296	0.100229	1.86956	1.58276e-28
CTD-2562J17.6	1.16399	6.36863	15.8126	6.0843e-25
CTD-2562J17.9	2.6082	7.13178	23.7763	3.72164e-35
RP4-564M11.2	0.0262086	0.0281027	0.59157	3.30664e-29
Cabili_1982	0.209577	0.231152	1.59224	1.93203e-11
RP1-34H18.1	0.0691821	0.394406	1.86047	3.62345e-30
LINC01166	0.00949944	0.0910361	0.590433	3.166e-33
GBM_LOC030373	0.548111	0.82571	2.33696	3.28341e-15
RP11-981P6.1	0.162698	0.223815	0.965394	6.58776e-36
AC010649.1	2.3652	9.67322	33.2144	2.01595e-19
RP11-416N2.4	0.319305	0.463564	3.74978	3.23403e-31
RP11-127I20.5	0.0908147	0.200911	0.550953	7.28683e-21
AC012074.2	0.169191	0.337931	0.713784	5.85159e-22
RP11-122K13.14	0.0412307	0.1811	2.45269	8.34447e-25
LINC01018	0.207267	0.284317	2.15531	3.21191e-17
IBA57-AS1	0.298438	0.649848	1.68532	1.80122e-29
RP11-867G23.1	0.134931	0.420037	0.556892	2.23871e-14
LINC00943	0.283537	0.462566	1.77138	1.57285e-11
RP11-38L15.3	0.838535	3.97234	8.35943	7.36347e-32
SCARNA9	1.07978	1.834	7.14143	5.35812e-18
RP11-119F19.5	0.470844	1.70015	2.33783	3.81658e-28
RP11-406A9.2	0.00873439	0.0183855	0.89348	1.04145e-16
RP3-406A7.7	1.11906	2.68329	6.73879	1.87279e-18
RP11-88L24.4	0.0320749	0.225875	0.97014	1.20377e-28
RP11-384L8.1	0.117419	0.286319	0.539814	1.33726e-14
ADAM20P1	0.157871	0.300908	0.705028	4.24599e-21
RP11-689P11.2	0.229595	0.515507	1.04207	4.92592e-21
AC137723.5	0.0753845	0.158645	0.967094	1.08233e-25
GBM_LOC006520	0.0662067	0.634513	0.734912	3.52104e-18
PCDH9-AS1	0.380113	0.624641	1.58261	1.26335e-21
RP11-286B14.1	0.138596	0.353176	12.4378	3.83586e-31
RP11-85O21.2	0.108373	0.158931	0.697237	2.94049e-12
CTD-2240J17.1	0.00885388	0.132839	0.54274	1.52468e-11
RP11-286E11.1	0.206434	0.490877	1.09542	4.47744e-08
RP11-567L7.5	2.61232	3.41047	11.3252	4.50892e-23
RP11-81H3.2	0.030692	0.154655	0.843883	7.63809e-18
SLC26A4-AS1	0.443652	0.974763	9.18315	2.90829e-22
RP11-731J8.2	1.01569	4.57218	6.54335	2.57861e-16
CTB-1I21.1	0.0026592	0.77785	0.0739032	0.0028828
AC016757.3	0.661432	0.758929	2.78007	2.64226e-17
GS1-72M22.1	0.116165	1.19554	2.56431	8.4477e-16
RP11-321E2.3	0.0367419	0.349392	7.31585	2.50256e-21
RP5-896L10.1	0.1117	0.193327	0.536132	6.10308e-16
RP11-361L15.5	0.262601	0.392814	8.09747	1.10791e-37
RP11-294N21.3	0.102136	0.500272	1.916	1.20377e-28
GBM_LOC000028	0.699259	2.15761	4.79859	3.66113e-29
RP11-165E7.1	0.0903193	0.122199	0.876479	1.75607e-34
RP11-762L8.6	0.565015	1.36523	3.96487	3.166e-33
RP11-1406H17.1	0.0671303	0.329983	1.32577	3.63188e-16
LINC00621	0.116107	0.318902	1.07228	2.20725e-21
Cabili_2351	0.20808	0.601308	1.58864	6.7553e-20
RP11-66B24.9	0	0.0794469	1.28991	1.3749e-27
RP11-66B24.1	0.0674243	0.118308	0.868811	5.19743e-12
CTD-2036P10.3	3.1086	6.3299	15.1009	6.31525e-37
PP12613	0.0249381	0.0414925	0.628641	8.74957e-18
LINC01164	0.00965696	0.0161007	0.853344	1.41461e-23
AC005009.2	1.12571	2.90519	12.7054	1.09991e-23
RP11-338K13.1	0.0694672	0.258949	0.790586	3.03022e-14
RP1-63G5.8	0.512478	9.33471	8.2119	3.9679e-17
Cabili_2774	0.128938	0.253993	0.717704	7.54005e-15
RP11-770J1.4	0.0714758	0.195987	0.500924	2.23284e-26
RP11-29G8.3	0.0159361	0.0813937	1.05859	6.33807e-27
GBM_LOC045051	0.135043	0.128011	0.922813	2.98953e-11
C1orf132	0.198818	0.270607	1.09679	4.0648e-25
LINCR-0003	0.0943499	0.234414	3.83416	9.84067e-19
RP1-212P9.2	0.210892	0.287764	2.55608	2.59557e-20
RP3-462E2.3	0.169493	0.668475	1.04435	1.50078e-27
GPR123-AS1	0.207385	1.488	1.87373	1.2467e-22
RP11-168O16.1	0.116229	0.366777	0.538521	3.26645e-10
TRHDE-AS1	0.0233521	0.41029	3.53296	3.74916e-37
RP11-454P21.1	0.0315109	0.155757	0.770995	6.0796e-11
LINC00499	0.0701131	0.303259	0.800072	1.04328e-09
RP11-151N17.1	0.12983	0.169815	0.565763	2.58811e-23
RP1-120G22.11	0.173835	0.258078	0.857603	1.59799e-13
RP11-826N14.2	0.0304048	0.0517374	0.948939	1.63082e-17
RP11-438B23.2	0.0149196	0.040754	0.909385	2.16678e-21
RP11-386G11.5	0.340475	0.265569	3.99693	4.21944e-28
RP11-386G11.3	1.66586	6.00779	121.093	5.42559e-31
RP11-755F10.3	0.768302	1.20185	3.40212	5.36611e-27
RP11-317P15.5	0.734893	0.675348	3.13607	1.94418e-12
CTD-2555A7.2	0.0773772	0.324278	1.32004	8.63936e-29
Cabili_2592	0.279743	0.575195	1.76021	1.9185e-23
RP11-1263C18.1	0.47372	2.3905	5.6626	2.52548e-19
RP11-441O15.3	0.282515	0.613402	1.47223	3.35773e-30
RP11-210K20.5	0.079163	0.172473	1.0803	6.3814e-28
RP11-497E19.2	0.119772	0.170121	2.19203	1.43068e-28
CTC-270D5.2	0.136547	0.313575	0.591094	2.37255e-11
RP11-527D7.1	0.585114	1.69534	4.37417	6.35898e-20
Cabili_448	0.451956	0.756588	1.8925	4.66528e-18
RP11-315E17.1	0.0518875	0.699863	0.265849	2.53572e-12
LINC01140	0.63017	0.474046	2.99201	4.24599e-21
PWRN1	0.00917348	0.105635	1.34601	2.84499e-30
LINC00632	0.808883	3.71784	9.18525	6.45478e-19
RP4-784A16.5	0.0657175	0.131696	1.09604	1.51054e-26
MAPT-IT1	0.0782641	0.235074	0.952983	1.5982e-24
GBM_LOC021874	0.102976	1.10624	1.05611	2.15787e-22
RORB-AS1	0.120653	0.128877	0.541337	4.42367e-13
KRTAP5-AS1	0.0950924	0.203194	2.88504	1.06389e-32
RP11-118K6.3	0.564419	1.99334	2.80674	1.80797e-25
RP11-361F15.2	0.17511	1.05999	3.58425	9.74717e-14
RP11-701H24.3	0.511808	3.5141	12.6207	5.23683e-32
MIMT1	0.218611	0.379	1.13887	6.81771e-09
KB-1460A1.5	1.30343	4.09816	6.26373	1.20506e-19
KCNH1-IT1	0.108322	0.462823	1.15022	2.15391e-18
HPN-AS1	0.157728	0.182036	0.706404	8.58392e-08
RP11-338K17.6	0.153547	0.196952	0.933079	1.15757e-24
RP11-986G18.2	0.062531	0.126087	0.587515	4.24599e-21
RP1-269M15.3	0.107373	0.361231	3.83077	1.6e-21
GBM_LOC012151	0.0222083	0.0972638	2.31781	1.06389e-32
RP11-108M9.3	0.0870415	0.0687475	0.516136	5.78128e-16
CTC-425O23.2	0.14846	0.387991	0.809473	1.90701e-26
RP11-562L8.1	0.00161046	0.0446657	0.860812	2.43122e-31
RP4-555D20.2	0.662315	1.64194	5.21596	3.10397e-13
RP4-555D20.1	0.246607	0.745196	2.19782	1.92646e-13
CH17-270A2.1	0.504757	0.666469	2.4824	6.7553e-20
RP1-41C23.2	0.904326	6.47641	29.0901	1.75607e-34
RP11-385G16.1	0.19224	2.09455	2.55361	1.2769e-27
CTA-221G9.12	0.0955901	0.220496	0.547423	4.14926e-14
RP11-57H14.4	1.27308	3.60663	5.19275	1.5162e-36
MRPL23-AS1	0.126201	0.595455	0.781937	3.12527e-24
AP003039.3	0.59534	1.32622	4.0958	5.26668e-17
RP3-388E23.2	0.300573	0.451724	1.60594	9.84067e-19
CTC-304I17.5	0	0.0363867	0.555917	5.65387e-26
RP11-284F21.11	0.233586	0.399188	1.1005	5.57298e-17
RP11-624G17.3	3.35503	8.27326	16.5977	1.87279e-18
RP11-806L2.2	0.0988356	0.111777	0.725887	1.39439e-25
AC011516.2	0.0196516	0.170973	1.30665	8.57227e-19
CTD-2527I21.4	0.219334	0.711113	4.19106	1.9185e-23
RP11-862L9.3	109.262	356.038	741.209	6.53989e-08
RP11-389G6.3	0.0411029	0.313338	2.54887	1.9185e-23
RP11-358N2.2	0.240824	0.362998	1.13925	1.64282e-16
RP11-869B15.1	1.94475	2.93681	8.80856	6.0843e-25
BX255923.3	0.154391	0.0302837	1.10834	2.22685e-09
AC007192.6	9.45788	16.0286	45.9724	2.48356e-22
CTD-2184D3.6	0.304191	0.631015	2.99004	7.78695e-31
MIR124-2HG	0.24803	1.86905	8.47508	2.29854e-22
RP11-29P20.1	0.0239103	0.12633	1.01952	4.73012e-29
HAR1B	0.0832223	0.524029	0.762697	1.03846e-14
HAR1A	0.144022	1.078	2.20658	3.01434e-20
LINC00951	0.296081	0.322835	1.66399	3.67773e-17
RP11-10E18.7	0.182146	0.446713	1.31559	9.68846e-30
GBM_LOC031963	0.0230263	0.15319	0.634696	3.67333e-21
Cabili_1126	0	0	0.546172	3.39509e-22
AC140542.2	0.0161029	0.0459849	1.48906	2.07527e-24
Cabili_786	0.0517714	0.103147	0.704922	1.73318e-18
TMEM246-AS1	0.373318	1.47018	2.87702	7.63809e-18
LINC00460	0.262387	0.0976963	2.04935	2.40754e-11
RP11-728G15.1	0.0853085	0.396707	5.23659	6.5004e-31
RP11-687F6.5	0.107218	0.233288	1.0418	1.15307e-29
RP11-672L10.2	0.0283329	0.0211423	0.82367	7.26211e-17
Cabili_862	0.470247	2.165	6.1532	2.58811e-23
RP11-338N10.1	0.122626	0.541357	0.800068	1.34308e-17
RP11-375B1.3	0.130002	0.0923885	0.745214	1.09411e-10
RP11-286N22.16	0.02223	0.0252925	1.02217	1.26376e-31
RP11-286H15.1	0.10949	0.204555	0.5638	3.49582e-11
GBM_LOC035841	0.0282223	0.0411413	0.576342	2.29854e-22
CTD-2265O21.3	0.0889477	0.180475	0.556169	4.42367e-13
RP13-20L14.10	0.223947	0.360863	1.13584	2.94718e-16
RP11-215G15.5	0.52688	0.86077	2.51988	4.1922e-17
AC141928.1	0.0559196	0.327197	0.752333	3.81445e-20
RP11-677M14.2	0.673397	0.794294	13.4772	3.13012e-26
RP11-13A1.1	0.0743138	0.0681951	0.844275	1.45695e-22
AC067969.2	0.050835	0.173557	0.824334	3.18384e-16
RP11-482M8.3	0.0921614	0.616156	1.62132	2.24246e-20
RP11-143K11.5	0.130684	0.913217	1.48154	1.2467e-22
GBM_LOC038848	0.111104	0.186728	1.08278	6.14678e-18
RP11-713C5.1	0.133459	1.30832	6.47274	4.77148e-25
AP000438.2	0.22924	0.752267	4.33788	1.39439e-25
MIR3911	1.36807	3.36792	6.84195	1.93711e-14
RP11-416I2.1	0.0454958	0.157798	3.591	6.16288e-23
RP5-827C21.6	0.0747689	0.149001	3.42881	3.81092e-36
EMX2OS	1.23657	2.92234	9.30618	6.97557e-27
Cabili_1016	0	1.26707	1.01845	1.47824e-09
LINC01123	0.0137693	0.0489483	1.73702	1.60638e-27
XLOC_054393	0.0106683	0.0406937	0.871861	1.84741e-22
GBM_LOC005204	0.0149304	0.0284218	0.990939	3.30701e-23
CTB-78F1.1	0.034896	0.0534669	0.744112	1.82044e-12
DKFZp434J0226	0.0685811	0.681769	1.22145	1.61202e-26
RP11-320H14.1	0.786285	1.46231	12.3663	2.26095e-16
RP4-568F9.3	0.222797	0.397337	0.937772	2.91635e-19
AC009014.3	0.0676276	0.303231	0.793618	8.4894e-13
LINC01234	0.308138	0.435186	1.86288	6.01241e-10
Cabili_858	0	0	0.598794	6.3814e-28
RP11-379F4.8	0.141221	0.3046	0.734383	5.95038e-19
RP11-357K6.1	0.160779	2.28972	1.55232	6.99044e-17
RP11-139H14.5	0.197799	0.849721	2.09654	3.2438e-36
RP11-379F4.4	0.741602	0.631169	3.71498	1.62368e-14
RP11-202H2.1	0.00109731	0.164622	0.907533	1.0242e-18
RP11-982M15.6	0.0526233	0.117769	0.739037	1.13594e-20
RP11-982M15.7	0.0581723	0.0684156	0.767301	5.15307e-19
RP11-1026M7.2	0.0131836	0.0257047	0.501343	5.36721e-16
GBM_LOC026482	0.0142981	0.0472318	0.866263	4.27753e-30
GBM_LOC014657	0.180774	0.313018	0.974286	5.36471e-21
RP11-1C8.7	0	1.19825	1.47368	6.78061e-14
RP11-1C8.4	0.0410066	0.457443	0.709271	3.26385e-13
RN7SL3	1.00481	0.633213	9.4902	7.63809e-18
LINC00087	1.09385	2.27433	8.60211	4.22536e-15
RP11-314B1.2	0.0609621	0.404182	1.41731	4.92592e-21
RP11-17E3.1	0	0.137661	0.876283	2.68503e-25
RP11-283I3.2	0.123157	0.121067	0.503568	5.98056e-17
LINC00982	2.18618	3.35508	10.853	9.60792e-24
CTD-2001J20.1	0.0780119	0.184023	0.711818	3.17859e-22
AC006946.16	0.0933326	0.114941	0.547744	1.52664e-10
RP11-16K12.1	0.0677647	0.304657	1.24023	1.20377e-28
RP3-355L5.5	0.216473	0.42823	0.92989	1.93711e-14
XLOC_046102	0	0.292813	1.00627	6.64961e-15
RP11-388P9.2	0.324334	0.994006	2.63945	1.5138e-29
AL450992.2	0.783632	0.528699	4.50007	1.63082e-17
RP11-66B24.4	0.491272	0.462267	3.70649	7.79845e-17
CTC-277H1.7	0.182074	0.206909	0.802565	1.15059e-17
RP11-400F19.18	0.307408	0.692634	1.43438	2.43192e-23
CTD-2380F24.1	0.354609	2.15359	1.53092	3.5976e-15
Cabili_1800	0	0	1.96134	5.87718e-17
PART1	0.645313	0.732543	4.73245	1.73708e-16
Cabili_2474	0.372612	0.50259	2.65366	5.36405e-22
RP11-164O23.8	0	0.163681	0.517853	7.50528e-27
MIR600HG	0.930875	2.15134	6.36294	2.79958e-17
RP1-240B8.3	0.0218031	0.259709	1.81004	1.9738e-22
GBM_LOC020835	0.0265064	0.0371481	1.20993	2.01595e-19
GBM_LOC020834	0	0.0452557	1.18864	9.25143e-22
U62631.5	0.0553821	0.209451	1.71708	1.69973e-22
RP11-365H22.2	0.15992	0.270661	0.92713	4.72914e-13
RP4-742C19.13	1.27492	3.87991	7.07747	9.25143e-22
RP11-247C2.2	0.0496803	0.076526	1.06896	1.37313e-26
AC062021.1	0.0397428	5.01288	0.375188	6.9477e-10
GBM_LOC009824	0	0	0.532051	5.42559e-31
CTD-2292M16.8	0.260266	0.456104	1.26424	1.60638e-27
RP11-65L3.1	0.590615	1.1464	3.22987	8.991e-20
VSTM2A-OT1	0.0222674	0.176534	0.699137	2.15391e-18
GBM_LOC030532	0.0144978	0.15267	0.572577	1.51473e-19
RP11-317N8.3	0.0766858	0.126765	1.04947	1.51869e-30
RP11-605F22.2	0.0679036	0.0820289	0.54547	3.33299e-24
LA16c-390H2.1	0.0948169	0.231916	0.68378	3.15701e-21
CTD-2058B24.2	0.048359	0.153578	0.619492	2.43192e-23
RP11-95I16.4	0.275929	0.765089	1.35652	1.84741e-22
LGG_LOC000307	0.0991025	0.212994	0.629673	1.88064e-28
RP11-461L13.3	0.109854	0.185746	1.53127	4.59026e-24
RP11-451M19.3	0.363867	0.981939	1.54327	2.18221e-17
GBM_LOC033792	0	0.0972866	0.71642	2.90518e-21
RP11-33E12.2	0.131369	0.445905	0.600392	1.83467e-13
LINC00086	1.88548	3.4913	8.64846	9.68152e-15
RP5-907C10.3	0.536822	0.916232	2.26045	6.10985e-12
FLG-AS1	0.155603	0.517121	1.36634	2.38287e-18
LINC00404	0.597692	1.96236	5.02609	4.13753e-20
RP11-20I23.8	0.45451	1.4979	2.18666	2.42288e-24
LINC00403	1.39661	4.19833	8.36467	2.37646e-19
ATP1B3-AS1	0.185479	0.205342	0.9546	1.00266e-16
RP11-293M10.6	0.403718	0.71682	1.76484	5.17562e-17
RP11-298E9.6	0.024718	0.0406258	0.896833	1.18656e-25
XXbac-BPGBPG55C20.1	0.374137	0.590157	1.553	4.42367e-13

## Sheet: LGG_vs_Normal
lncRNA	median_GBM_expression(FPKM)	median_LGG_expression(FPKM)	median_Normal_expression(FPKM)	LGG_vs_Normal_FDR
RP11-670E13.6	1.54177	0.754015	0	1.67366e-30
RP11-548H3.1	3.75013	3.4869	0.860306	2.27937e-32
CTD-2026K11.1	20.3856	16.0037	3.07696	1.60991e-25
RP11-159K7.2	0.702056	0.476891	0.110149	2.01649e-14
RP4-559A3.6	2.20687	0.367586	0.0461269	2.48632e-15
RP11-175K6.1	1.26368	0.583676	0.129982	3.93592e-21
RP11-315A16.1	0.616755	0.134154	0	4.98796e-09
GS1-166A23.1	0.434176	0.738126	0	7.5112e-11
RP11-3P17.5	18.5536	62.2502	4.72816	3.17736e-41
GBM_LOC030682	0.176925	0.534666	0	1.40723e-40
RP11-661A12.4	0.216076	1.86967	0.256358	1.62097e-21
Cabili_242	0	0.559131	0	4.33897e-09
CTD-2544H17.2	0.398675	0.747218	0.135534	3.91489e-22
AC083864.3	0.215166	1.1663	0.00201721	1.75168e-38
GYG2-AS1	0.701013	2.54488	0	9.78254e-50
CTD-3116E22.8	0.63296	1.07901	0.153152	1.01037e-15
AC011558.5	16.7793	8.3228	1.74296	6.39704e-18
RP11-193F5.1	0.0565134	3.50822	0.39601	1.0017e-06
LINC00693	2.47236	8.96193	2.01957	5.84003e-30
BAALCOS	7.04726	6.28907	1.26941	2.51928e-29
Cabili_2091	0.301256	0.551936	0	0.000172326
EGFR-AS1	0.599364	0.309738	0.0451398	2.67754e-24
RP11-567I13.1	0.958491	3.05547	0.51135	4.67719e-25
AC002456.2	6.24186	2.3058	0.302254	1.29964e-27
AC011524.1	0.0911969	0.884603	0.148278	8.09588e-17
RP3-337O18.9	6.53787	5.94599	1.3821	8.6799e-27
NOVA1-AS1	1.31539	1.52948	0.093924	1.17645e-34
AC097724.3	1.61046	3.11515	0.525433	2.5435e-31
AC004257.1	0.0710178	1.42326	0.0241718	2.6141e-33
RP1-266L20.2	1.23243	1.99274	0.366397	4.85415e-25
CH507-39O4.1	0.372406	0.654546	0	5.7837e-16
RP11-69H7.3	3.55989	3.22736	0.724217	4.0467e-24
HOXD-AS2	1.80381	0.280816	0	1.80019e-39
RP11-104H15.7	0.855942	0.909497	0.11201	2.1344e-32
PSMB8-AS1	9.32517	3.52439	0.827524	3.98749e-32
AC004702.2	0.933841	1.62485	0.210483	3.27453e-23
RP11-315I20.1	1.1436	2.98144	0.442099	5.72892e-36
Cabili_1332	7.62957	4.7118	1.15905	4.71553e-20
LL22NC03-N64E9.1	0.31571	1.35145	0.163053	7.32087e-19
Cabili_1930	0.707021	1.06062	0.119073	3.89131e-24
LLNLR-470E3.1	1.90204	1.21929	0.107851	3.8872e-22
WEE2-AS1	4.28533	3.07459	0.638852	3.07047e-34
RP11-414H17.5	0.403477	0.550447	0.111869	3.985e-15
RP13-582O9.5	19.9868	21.6944	5.05178	3.47132e-25
RP11-290L1.3	52.8535	72.7882	9.46241	4.52009e-32
RP11-733O18.1	0.818406	0.5121	0.117761	7.2707e-19
RNF157-AS1	2.87521	5.5461	1.08011	6.1134e-39
RP11-159D12.11	0.898004	1.34975	0	1.75942e-08
DNMBP-AS1	0.284776	1.12668	0.212427	1.29799e-26
LAMA5-AS1	1.49362	1.55966	0.0930286	2.88721e-33
RP5-826L7.1	0.73679	0.847492	0.150982	2.13404e-20
RP11-551L14.4	1.49171	2.84711	0.41979	1.08351e-33
RP11-266L9.8	4.70805	5.83575	1.35021	2.27937e-32
Cabili_1922	0.574564	0.587639	0	9.32945e-11
RP11-329B9.5	0.865186	1.61853	0.206712	5.93988e-32
RP11-328J6.1	0.386919	1.77661	0.378421	7.58887e-23
CTB-129P6.7	0.720988	1.03246	0.0728754	1.26828e-45
WNT5A-AS1	0.712027	0.538781	0.0622627	8.49186e-24
HLA-DQB1-AS1	13.9241	2.64382	0.184157	1.49254e-09
LINC01279	5.15975	6.96365	0.279253	4.85456e-42
RP11-556E13.1	1.29954	0.993589	0.0843667	5.17305e-21
RP11-84C10.2	0.792628	0.166225	0	4.35701e-14
Cabili_1816	1.25558	2.08343	0.462233	3.19082e-17
HAS2-AS1	3.727	2.44429	0.202592	2.32415e-39
LINC01094	14.7818	15.8358	1.24898	1.83223e-31
RP11-145M9.6	3.03714	3.45501	0	2.77702e-10
CTD-3187F8.14	1.00434	0.214054	0.044435	1.14315e-19
AC007362.3	0.570894	0.31825	0.0753875	6.82641e-11
RP11-1102P16.1	0.25847	1.04093	0.0752055	1.18522e-33
RP11-485G4.2	0.655914	0.407432	4.43828e-06	3.97645e-16
RP11-565P22.2	0.808557	0.0570406	0	4.58237e-08
RP11-81A22.5	1.65241	2.05734	0.432461	5.42582e-29
RP11-152H18.3	31.7019	29.0491	6.96303	1.34928e-34
CTD-2013N17.4	0.154081	1.4451	0.0320759	7.1682e-39
RP11-378E13.4	0.0419499	0.889182	0	6.329e-38
RP11-4B14.3	0.448833	1.19317	0.164835	7.62892e-23
RP11-103H7.5	2.10122	6.79955	0.878655	1.47761e-24
RP3-326L13.3	6.43252	10.0657	0.918558	5.22857e-29
RP1-309F20.3	0.715499	1.00256	0.23867	1.17315e-23
PARD3-AS1	0.392437	1.13495	0.267992	2.25477e-18
RP11-126K1.6	8.09482	6.16833	1.40617	4.63041e-30
AC007319.1	1.44358	0.688701	0.124422	7.34519e-09
RP11-403A3.3	30.4398	5.57448	0.804982	5.76457e-19
RP11-54O7.16	0.173933	1.05021	0.0992916	9.5349e-20
CTD-2616J11.9	23.4013	24.0075	4.25063	2.75133e-19
CH507-528H12.1	0	3.44714	0.0266364	7.10889e-11
ISX-AS1	0.00407913	0.66181	0.0500903	0.0234002
Cabili_1481	0.545473	1.37947	0.220504	1.67285e-29
RP11-259N19.1	2.52976	3.09996	0.208805	2.66766e-39
AC009227.2	0.418934	5.8635	0.865901	2.21014e-26
LINC01088	8.31993	65.9516	0.901242	4.96418e-39
LINC01354	1.97976	2.43005	0.595984	1.52251e-22
RP11-343J3.2	0.446622	1.26898	0.173885	2.91001e-24
LINC00689	0.293235	3.17159	0.084598	3.00664e-36
RP11-133F8.2	0.450692	2.06906	0.340572	9.09344e-17
RP11-236B18.5	0.663193	1.03264	0	2.85928e-14
FOXD1-AS1	16.1969	6.77329	1.16026	1.84553e-24
Cabili_387	7.33601	7.99861	1.7049	1.38828e-22
GBM_LOC026870	0.21876	0.502612	0	7.22204e-43
AC004854.4	0.429497	1.19813	0.0274337	4.98664e-19
RP11-317P15.4	0.570396	0.413766	0.0448201	2.74846e-36
TFAP2A-AS1	1.15	1.51293	0.0188821	2.26166e-42
AC053503.11	0.669063	3.68395	0.535556	9.22459e-26
CH507-513H4.1	3.74817	0.690616	0.0341937	9.10526e-12
CTD-2139B15.2	3.4184	2.43474	0.313634	1.72558e-29
GBM_LOC012292	0.846186	1.03962	0.0614391	1.33999e-12
RP11-480C22.1	1.94595	4.62642	0.751107	7.84513e-19
GBM_LOC039900	0.534874	1.05079	0.0307712	5.23702e-31
RP4-625H18.2	0.85299	1.0217	0.133226	1.44229e-22
AC079305.11	0.00983401	1.17423	0.102786	3.45498e-26
AC015849.13	0.0270727	2.51665	0.0983209	1.03081e-28
RP4-580N22.2	1.91304	1.90409	0.0545406	6.40577e-23
RP11-120J1.1	4.01586	7.11524	1.48939	2.25972e-30
Cabili_1493	2.17965	9.23343	1.11878	3.90559e-30
Cabili_378	0.318639	1.18528	0.173353	6.40577e-23
RP11-44N11.2	0.391304	1.11424	0.098988	8.38581e-39
FLJ16779	2.27859	24.2021	0.94109	6.03864e-47
LINC00237	3.13418	8.32648	1.06926	8.57405e-33
RP11-49K24.4	0.79149	0.406398	0.0988774	0.000345652
GBM_LOC014495	1.08888	3.22645	0	6.53225e-34
CDKN2B-AS1	0.278716	0.582951	0.136963	1.3877e-17
RP11-264A11.1	0	0.562449	0	2.5466e-20
RP11-1094M14.14	0	0.573855	0	4.0321e-27
RP11-1167A19.2	8.88346	13.6572	3.25682	3.62511e-35
LINC00906	0.040672	0.617181	0.0805954	8.51266e-19
AC006126.4	0.524153	0.0315448	0.00197316	6.59927e-18
CTC-564N23.2	22.826	37.5968	7.59438	3.1314e-39
RP5-1177M21.1	0.259364	3.09926	0.173644	2.55939e-29
RP11-47I22.1	0.599024	2.93057	0.230055	6.39315e-26
RP11-742B18.1	0.834079	0.00555257	0.00132479	1.3755e-19
SLC9A9-AS2	0	0.764139	0	2.6467e-37
CTC-498J12.1	1.0645	0.465698	0.0126316	1.32707e-19
GBM_LOC039128	0.397249	0.513039	0.124381	5.13307e-18
VCAN-AS1	29.1218	32.5575	3.40424	2.64152e-32
RP11-217B7.2	0.336817	0.503657	0.0827811	8.12235e-22
RP11-815J21.2	0.443806	0.984339	0.197281	4.6116e-11
RP11-429B14.4	2.07818	5.76766	1.12339	6.09155e-14
RP11-299L17.3	1.62108	0.345167	0.050707	2.00424e-23
RP11-185E8.1	1.15041	0.672088	0.0190316	1.33409e-25
RP11-713M15.2	0.670794	0.364994	0.0276413	4.25043e-33
LGG_LOC043626	0.679494	0.139606	0	3.03716e-23
LINC01532	0.281895	3.70559	0.811022	3.40607e-14
RP11-624M8.1	0.814678	4.66967	0.334587	2.34063e-27
RP11-196H14.3	9.22067	13.8542	2.9662	1.55945e-35
RP3-460G2.2	3.1785	0.516316	0	2.4142e-27
RP1-167F1.2	0.391989	0.818762	0.0640848	3.89131e-24
RP11-791G15.2	1.10559	0.584079	0.136875	3.51815e-19
LBX2-AS1	1.34217	0.504187	0.111311	6.86059e-29
MIR497HG	17.8172	22.9838	5.57474	2.70237e-34
RP11-104H15.9	1.71749	0.935163	0.203293	5.12883e-35
RP11-229P13.23	6.62014	17.6238	3.12826	4.66001e-22
PDCD4-AS1	2.435	2.67791	0.456425	3.94685e-44
FOXP4-AS1	0.721785	0.488811	0.0028923	1.0056e-31
RP3-369A17.4	1.70708	0.854751	0.0694416	1.0042e-20
RP11-861E21.1	0.683361	0.850631	0.202447	0.000178091
RP11-264B14.2	0.605217	0.411286	0.0867911	1.51209e-15
RP11-1398P2.1	0.553656	0.362956	0.0389068	7.74515e-20
GBM_LOC000937	2.43487	1.28185	0.128361	1.5615e-21
IGFBP7-AS1	19.4724	12.5486	0.344659	5.50253e-41
LGG_LOC046950	0	0.59278	0	7.52547e-29
RP11-452F19.3	9.08726	8.94525	1.93818	7.09071e-41
RP11-455B3.1	0.835166	0.614927	0.128842	8.10583e-10
Cabili_2928	0.678011	0.666634	0.117182	1.00019e-11
GBM_LOC042831	0.30375	1.1983	0.241883	7.21571e-24
RP11-58K22.5	0.75642	0.907007	0.110523	3.89849e-19
RP11-179A16.1	0.138428	0.583194	0.0705161	6.53878e-21
RP11-806H10.4	1.37234	0.15996	0.00682441	4.47567e-18
CTD-2545G14.4	4.31541	3.09945	0	4.12101e-07
RP11-177H2.2	0.248678	0.593638	0.0749603	1.66561e-26
RP5-1056H1.2	0.379994	7.82708	0.360905	1.89131e-37
CTD-2012M11.3	1.51319	1.36753	0	1.83223e-31
AD001527.7	1.00547	1.75569	0.375445	1.22122e-31
LHX5-AS1	0.0107744	1.11495	0	7.46542e-25
LGG_LOC036929	0	1.05827	0	8.73005e-16
GBM_LOC014973	1.16396	1.84943	0.447999	1.53345e-24
RP5-1198O20.4	3.70689	7.28115	1.73605	1.47827e-18
RP11-220C2.1	0.330995	1.98444	0.0374967	3.32527e-29
LINC01506	0.729212	0.225693	0	1.24662e-26
GBM_LOC049109	0.836495	0.111096	0	4.01096e-06
RP11-212P7.2	3.55687	4.75218	1.14075	7.41395e-25
RP11-521C20.3	2.32228	1.77285	0.290812	1.70964e-34
HCG15	0.57481	0.368653	0.0631864	4.83028e-24
HCG16	0.859685	0.464268	0.0170076	8.17212e-19
ARHGAP31-AS1	0.537567	0.790929	0.0596152	1.44659e-32
CTB-46B19.2	1.11071	1.6946	0.0937972	3.02883e-39
GBM_LOC001634	0.516595	0.23403	0.0567327	2.30089e-15
RP11-19E11.1	0.771946	0.0910151	0	1.49701e-27
RP11-20E24.1	0.45256	0.699355	0.155698	1.44402e-17
RP11-150O12.6	0.537236	0.213647	0	1.63191e-15
LGG_LOC030946	0.133898	0.929705	0.0624121	2.67754e-24
DPYD-AS1	0.644944	0.352699	0.0806167	1.40125e-12
RP11-524D16__A.3	2.70722	0.275264	0.059037	6.82641e-11
GBM_LOC032111	0.261199	1.06011	0	4.33983e-15
CTD-2231E14.5	0	1.08696	0	2.50275e-38
RP11-263K19.4	34.4883	47.4672	10.4679	5.25572e-36
GBM_LOC032075	0.182285	0.578444	0.0691048	7.10014e-24
RP11-698N11.2	7.2821	2.42054	0.0818148	1.64517e-34
RP11-54O7.3	0.276147	1.83598	0.365189	5.98554e-23
RP11-284F21.7	62.6807	164.063	10.7424	2.21011e-49
RP3-466P17.1	0.448163	1.29264	0.279069	3.80424e-21
RP3-466P17.2	1.14379	2.28574	0.142967	2.36794e-17
CTC-458G6.2	0.0773217	0.702547	0.0329144	4.62704e-22
GBM_LOC037098	0.137209	0.570456	0	4.96458e-18
RGMB-AS1	1.46034	2.1636	0.414814	5.42582e-29
CH507-39O4.2	0.817982	1.00127	0	9.97328e-16
GBM_LOC048426	3.31748	0.404966	0	2.99711e-18
RP11-290D2.6	187.65	227.793	51.1223	1.53127e-31
RP4-616B8.4	1.43187	1.09358	0	8.64155e-18
Cabili_394	0.452804	0.664728	0.0554341	4.72035e-15
RP11-15I11.3	0.399883	0.608343	0.00286942	7.10014e-24
AC000068.10	0.264865	1.14195	0.105215	4.02859e-30
LGG_LOC047270	0.874125	0.436922	0	7.89128e-31
LINC01426	0.879378	0.098213	0.0106799	2.56586e-23
LINC01268	2.13605	2.00357	0.387256	1.10062e-26
CTD-3032J10.2	0.33571	0.892757	0.0959529	9.28993e-15
LINC01287	0.23177	2.29971	0.222692	1.03289e-29
Cabili_2530	0.837971	0.359014	0	1.50701e-08
LINC01358	2.82135	0.363401	0.0447675	4.51705e-14
LINC01198	1.17476	0.14087	0.00165785	2.7847e-24
GBM_LOC025187	0.0100308	2.28564	0.396957	3.53261e-13
KLHL7-AS1	0.632992	0.664771	0.153746	3.59108e-16
RP11-148K1.12	12.075	9.40652	1.45371	1.6631e-32
AF131216.5	0.819841	3.96347	0.823995	3.63996e-21
XXbac-BPG55C20.7	0.574626	0.332383	0.0445168	1.37028e-12
RP11-116N8.1	0.85651	3.3174	0.693053	6.50089e-17
NFIA-AS2	6.4511	5.43135	0.440267	1.09325e-37
RP1-65J11.1	1.65362	0.94312	0.172601	2.67864e-31
LINC00519	0.364364	0.852087	0.0515511	3.48898e-36
RP11-480D4.6	0.501924	0.421246	0.0581071	8.88458e-18
RP11-238F2.1	0.37064	1.15439	0.187846	5.06011e-25
AC017002.1	0.537767	0.0305537	0.00397144	5.52108e-06
Cabili_2207	0.242997	0.691102	0.0938375	3.75865e-11
AC073283.4	1.81638	3.83961	0.61229	1.0864e-22
GBM_LOC028290	1.12654	1.61071	0	4.85456e-42
GBM_LOC028295	0.147972	0.562249	5.96688e-22	1.76925e-31
GBM_LOC028297	0.0571931	1.0347	0	6.03864e-47
RP11-124N14.3	191.118	75.644	3.2075	5.12883e-35
RP11-2E11.5	0.324545	1.09028	0.200445	1.56564e-33
RP11-542C16.1	7.97368	8.77899	1.78709	6.87108e-43
RP11-21L23.3	1.06648	1.17543	0.293347	4.9985e-18
RP11-247A12.1	1.21055	1.68771	0.170397	1.48672e-35
Cabili_1455	0.500049	0.903449	0	1.40917e-27
RP11-347E10.1	1.72355	0.517807	0.00252924	5.37838e-32
RP3-405J10.4	0.977907	0.900942	0.199323	1.71261e-16
RP11-219B17.3	0.591614	0.718389	0	1.49585e-38
GBM_LOC042318	0.442667	0.743729	0.111427	5.66146e-30
RP11-420L9.5	4.39517	2.62659	0.529064	2.5024e-41
Cabili_2341	0.607194	0.801742	0	1.48387e-26
RP11-325L12.6	1.26385	2.07099	0.443863	2.90089e-16
CH17-140K24.6	0.615418	1.72426	0.36071	9.78849e-12
RP11-452L6.6	0.582044	0.582146	0.0766609	2.02455e-35
AJ011932.1	0.722077	0.132468	0	5.41333e-09
CTD-2201G16.1	0.125646	1.5869	0	6.22848e-29
RP11-343H19.2	3.21518	3.95575	0.373925	8.02403e-32
RP11-61A14.3	1.7446	2.76446	0.585419	1.2887e-24
RP11-38L15.8	1.05706	2.9435	0.726857	2.72651e-35
RP11-51J9.5	5.07254	8.08738	1.50903	7.07153e-36
C8orf12	0.185991	0.584059	0.0904316	3.13372e-24
RP11-414C23.1	0.925104	0.662743	0	0.000237508
RP11-326C3.7	1.39091	2.30235	0.377447	1.38152e-30
AP001062.8	0.573332	2.84806	0.466907	1.32454e-15
CTD-2369P2.2	2.61705	2.22204	0.360056	4.96418e-39
HOTAIRM1	8.65803	0.689097	0.035415	3.26537e-26
CTD-2369P2.8	4.0097	1.07996	0.175169	7.10014e-24
HOXB-AS1	2.40157	0.182385	0.0343311	9.20327e-14
CTD-2291D10.4	0.610033	0.809017	0.0818749	4.29924e-18
RP11-66N11.8	5.32157	5.84048	1.37746	1.52729e-28
RP11-401P9.5	0.476363	1.07856	0.165815	9.21494e-27
GBM_LOC039120	0.483685	0.692975	0.0588224	3.36732e-31
GBM_LOC047199	0.0225445	0.74947	0	4.7217e-31
RP4-607I7.1	0.516199	0.294151	0.00507272	8.01986e-24
AC037445.1	0.0165851	0.830229	0.023915	2.80254e-23
Cabili_134	0.61822	1.9378	0.188478	2.95388e-25
AC015936.3	31.5564	14.5719	3.29458	2.4349e-20
AC016700.5	2.56101	3.74263	0.926794	1.18658e-29
GBM_LOC025944	0.657947	0.595929	0.13633	8.88458e-18
AC002429.5	0.31976	1.44436	0.202901	1.95398e-19
CTB-1I21.1	0.0026592	0.77785	0.0739032	4.12565e-13
AC068499.10	0.887093	0.819702	0.140525	5.91928e-15
Cabili_450	0.150146	0.578289	0.114266	7.14786e-16
Cabili_457	0.515541	0.180411	0	7.37107e-15
AC021188.4	1.3259	2.3862	0.160138	2.50367e-42
RP11-848P1.5	2.35538	1.85058	0.271676	5.62963e-31
RP11-517I3.1	0.694332	2.20041	0.30332	1.22922e-22
AC068535.2	2.5411	2.88384	0.226237	1.10079e-35
AC002451.3	0.571554	1.2408	0.277552	1.49341e-12
RP11-90P13.1	0.684021	0.640999	0.0748231	1.13271e-22
RP11-731F5.2	1.84946	0.399523	0.00594065	2.28412e-22
RP11-344B5.2	2.13553	1.7882	0.219898	8.40575e-25
RP6-201G10.2	0.706373	4.05027	0.919063	9.32781e-32
RP11-97N19.2	0.16433	2.07449	0.140286	1.02768e-30
AC092675.3	1.95789	1.10353	0.0749627	1.47913e-31
Cabili_2293	1.43786	0.492884	0	5.28736e-17
AC147651.4	2.27031	0.594297	0.14673	1.31452e-18
MIR181A2HG	1.08408	1.04498	0.0574708	6.25877e-24
RP11-498C9.13	26.5433	28.0079	3.33657	8.90217e-44
TBX2-AS1	6.14166	8.21591	0.294065	3.95172e-43
AC133785.1	0.455083	1.05184	0.161146	5.6256e-26
RP11-615I2.2	0.460361	1.6219	0.386709	2.90582e-13
RP11-818F20.5	0.60166	0.93498	0.0858194	5.05341e-44
CTD-2647L4.1	0.34266	1.13056	0.244023	1.94278e-14
FOXD3-AS1	6.91097	1.02533	0	1.41493e-25
RP11-182J23.1	0.356347	1.35865	0.21063	1.27171e-23
RP11-21A7A.4	0.298781	1.04912	0.212489	2.10845e-27
RP11-756G20.1	0.495496	0.512227	0.0481067	1.75179e-28
RP11-91P24.6	0.458293	0.546294	0.101362	6.24178e-25
CXorf28	0.953121	1.13365	0.259327	9.62446e-11
RP13-726E6.2	0.176117	1.05967	0.237126	2.91722e-20
RP11-334A14.5	2.84363	5.16587	0.842831	9.02574e-31
CTD-3128G10.6	2.05556	1.19445	0.262935	2.27937e-32
AC083884.8	3.55315	9.23474	0.982728	8.58576e-30
SMAD1-AS1	14.3974	13.3066	3.15856	7.93037e-31
UBE2E1-AS1	0.934217	0.670918	0.134558	7.06012e-39
AC034228.3	1.09286	2.07343	0.263361	4.27289e-26
RP11-844P9.2	0.974813	1.31894	0.285425	8.73981e-18
RP11-401P9.4	2.51242	13.1427	2.1797	7.3029e-36
RP11-31F19.1	5.54671	6.21129	1.03789	2.89497e-18
RP11-701H24.7	0.199948	0.581633	1.59498e-08	1.5107e-10
RP11-159F24.3	0.349058	1.02431	0.230165	5.63121e-30
CTD-2026G6.3	0.451368	1.30481	0.0455083	1.54338e-12
bP-2189O9.3	0.0838546	1.40885	0.0313972	3.11051e-36
AC092687.5	0.443986	0.789946	0.0705337	1.74395e-21
RP11-74H8.1	37.7208	65.9548	10.211	1.50661e-21
RP11-284F21.10	1.20774	1.56001	0.385054	3.48514e-29
LGG_LOC027853	0.0928253	1.2617	0.0490193	9.81463e-39
CTB-147N14.6	3.30297	1.906	0.204239	1.8419e-27
MGC32805	0.340947	0.514155	0.0767926	1.80955e-25
GBM_LOC004789	0.940343	1.72997	0.228147	8.27615e-26
Cabili_1401	0.789324	1.09246	0.10198	2.76179e-26
RP11-145M9.4	6.91792	4.42423	0.178878	1.40434e-16
Cabili_152	0.598448	0.231267	0	1.48985e-34
RP13-20L14.6	1.38653	1.05656	0.144323	1.07213e-25
LINC01150	1.39646	0.687023	0.0332286	4.40665e-16
LINC01485	0.595774	1.66422	0.411459	1.05899e-15
LINC01480	1.6207	1.9906	0.461624	3.59638e-18
Cabili_276	0.616648	0.200989	0	1.00499e-08
AC093620.5	0.623332	1.32028	0.0541244	7.83021e-33
RP11-326C3.12	0.796566	0.619297	0.0845918	1.66561e-26
HOXA-AS3	0.585198	0.000659478	0	1.08734e-10
HOXA-AS2	2.66216	0.0221412	0	1.93573e-23
RP11-295M18.6	0.370787	0.866852	0.157475	1.95656e-27
RP11-48G14.3	0.508737	0.814099	0.142113	4.43657e-21
ST7-AS1	2.3512	2.85401	0.337784	4.85946e-45
OOEP-AS1	0.735719	1.11088	0.0501954	1.18855e-30
RP5-940J5.6	1.91506	4.83158	1.11744	1.02768e-30
CRNDE	15.824	1.76666	0.355203	2.82336e-15
RP11-553L6.5	23.8756	60.7009	7.40996	2.38231e-45
GBM_LOC002313	5.9063	1.65165	0.029902	1.0345e-32
ELMO1-AS1	0.378068	1.59751	0.0338511	1.33472e-33
CTD-2265O21.7	3.52077	1.83998	0.339608	6.59927e-18
GBM_LOC028474	0.633517	0.956021	0.200488	4.55449e-29
AC067969.1	0.0414346	0.572597	0.0368204	3.51815e-19
CTB-167B5.1	1.65554	1.16438	0.0705063	8.26722e-37
RP11-44N11.3	0.418784	1.08316	0	3.89849e-19
RP11-203M5.8	11.4237	6.4231	1.60271	5.15899e-40
RP11-442H21.2	86.4074	122.115	21.479	7.57174e-36
RP11-159H10.3	0.202153	1.06363	0.154236	7.78414e-24
GBM_LOC047393	0.733774	0.728226	0.160123	8.27347e-21
LINC01235	1.94508	1.24106	0.120061	3.91118e-18
RP4-545L17.11	1.80536	1.67775	0.0658089	4.7947e-14
CTD-2035E11.5	0.35832	0.55398	0.0930731	4.5542e-22
RP11-178L8.7	1.21521	1.59663	0.396282	2.54287e-21
Cabili_319	0.616603	0.383012	0.0898922	4.38528e-22
YTHDF3-AS1	2.11906	1.96454	0.330554	2.248e-30
RP11-181C3.1	1.12768	1.31552	0.203443	7.76663e-25
CTC-255N20.1	0.483374	0.68294	0.0770004	2.23397e-35
LINC00475	0.624429	0.0611173	0.0138794	8.27607e-05
CTD-2194A8.2	0.898398	1.31901	0.226545	1.8655e-15
CTD-2653D5.1	0.339604	0.57397	0.10408	1.5751e-20
GBM_LOC003055	0.877345	1.62056	0.18655	3.50032e-27
CTB-178M22.2	1.87054	2.30537	0.413506	1.16732e-23
RNU11	3.08446	2.78982	0	0.0019873
RP11-838N2.4	0.739792	0.0811248	0.00515256	1.01175e-11
RP11-632P5.1	0.0660698	0.864368	0.0185083	8.63262e-30
AC069363.1	0.869962	1.6152	0.156438	3.55776e-17
GBM_LOC018715	0.601368	0.0752943	0	1.6293e-10
RP11-185E8.2	3.20714	3.37447	0.727719	3.95639e-31
RP11-834C11.4	12.0245	4.30426	0.722141	6.14201e-26
RP11-231C18.1	1.52879	16.0398	0.582959	4.37118e-32
RP11-231C18.2	0.0892658	0.955957	0	5.6256e-26
C14orf64	2.42663	2.43547	0.554167	3.96697e-29
CTB-113P19.1	0.546007	1.00889	0.0429703	4.96418e-39
CTA-384D8.34	0.679184	0.167157	0	2.7316e-11
ZBTB20-AS4	0.152381	0.776609	0.11891	1.99866e-21
GBM_LOC034667	0.723199	2.42285	0.329957	2.99532e-19
MIR4674HG	0.556299	0.77347	0.186794	2.80424e-24
RP11-307C19.2	0.803959	1.15302	0.19074	2.34552e-28
LINC00511	42.6369	44.9354	6.59485	3.16419e-35
AC004540.5	5.41303	8.40746	1.81418	3.63161e-19
Cabili_1914	0.249727	1.00789	0.241468	7.40759e-18
RP11-286H14.8	9.63265	5.33508	0.716673	9.50209e-42
AC062021.1	0.0397428	5.01288	0.375188	7.51697e-18
RP11-83N9.6	0.286135	0.635547	0.133222	1.31521e-29
RP11-446N19.1	0.787759	1.07875	0.105716	1.18658e-29
WARS2-IT1	0.639314	0.398046	0.0146359	8.65137e-24
RP11-536O18.1	0.581754	0.442848	0	8.57405e-33
RP11-551L14.6	0.456905	1.03182	0.16811	9.63861e-15
RP11-390F4.6	2.67553	2.16403	0.519145	5.37838e-32
AC092580.4	0.656945	0.206732	0	2.26997e-10
RP11-122C5.3	0.430159	0.525746	0	3.48898e-36
PCED1B-AS1	29.1812	11.1763	1.92945	1.71148e-18
IQCA1-AS1	0.349284	0.594705	0.0229351	1.23655e-29
LINC00310	0.474686	1.08733	0.166468	1.18946e-26
CTD-2193P3.2	0.243454	0.824803	3.83024	5.46892e-14
RP11-761I4.3	0.223954	0.210269	0.887361	2.81384e-14
RP5-1104E15.6	0.0354899	0.103931	0.598499	2.97465e-19
MEG9	0.600823	0.351625	2.49505	1.24772e-27
MEG8	0.509959	0.359777	3.27015	1.89131e-37
RP11-566K19.6	2.49524	3.06327	14.9233	1.24757e-24
GBM_LOC003131	0.0847827	0.127301	0.744517	2.93383e-25
LINC00202-1	0.129163	0.222843	2.10413	3.06916e-34
SNHG24	0.11943	0.086191	0.581452	3.61105e-32
Cabili_1166	0.0460091	0.155411	2.00617	6.42254e-07
RP11-4K16.2	0.0466231	0.113772	1.89501	5.50944e-15
RP11-297M9.2	0.148446	0.684466	3.71294	2.55129e-11
DLX6-AS1	0.411701	0.376948	2.32683	7.38343e-16
RP1-78O14.1	0.156718	0.297955	4.86576	1.14238e-26
FLJ33534	0.120012	0.133451	1.72319	2.61278e-14
DCTN1-AS1	0.165851	0.42955	5.28221	2.66484e-24
RP11-173C1.1	0.277095	0.239062	1.41186	5.6011e-21
RP11-467K18.2	0.0453056	0.0770474	0.821855	3.43365e-22
RP11-271F18.4	0.00309934	0.10341	1.55795	9.14122e-24
RP4-593C16.4	0.206677	0.367632	2.23244	3.52267e-30
MIR137HG	0.184912	0.205576	2.02523	9.55058e-29
AL132709.8	0.228028	0.0928682	0.705705	2.66267e-28
MEG3	27.6214	31.4108	281.195	1.0787e-34
LINC00893	1.41159	0.593864	3.09318	9.93479e-22
RAPGEF4-AS1	0.069217	0.0863026	0.520227	4.10136e-14
RP5-1028L10.1	0.154381	0.544102	11.7498	1.63127e-23
RP11-411B10.7	0.253507	0.183742	0.93247	1.40917e-27
RP5-1160K1.8	0.0548542	0.239204	2.04409	1.04564e-22
RP11-499A10.3	0	0.0486632	1.19039	1.76514e-32
RP13-895J2.4	0.0387627	0.0683509	0.59458	2.21512e-17
RP11-958J22.1	0.00241335	0.104027	1.79489	1.11344e-19
GBM_LOC047602	0.0642397	0.153896	1.01108	4.12539e-17
RP11-50D16.4	0.0850499	0.154858	0.725024	5.17519e-12
MALAT1	40.4083	53.2469	233.072	5.06011e-25
RP11-203F10.5	0	0.0611551	0.512468	4.95329e-25
GBM_LOC007438	0.0373395	0.0703314	0.641248	1.98435e-34
FAM157C	0.442573	0.165574	0.714657	1.17235e-25
CYP4F35P	0.148049	0.272126	2.70592	1.67984e-19
SNCA-AS1	0.0675352	0.102955	0.657312	3.0773e-16
RP11-433J8.1	0.0635012	0.131601	1.77511	6.53877e-25
Cabili_2104	0	0.101037	0.533876	2.83687e-14
GBM_LOC030696	0.0443247	0.194235	0.877428	5.63e-14
RP11-17L5.4	0.00236346	0.0991093	3.30569	1.99011e-23
RP11-805F19.3	0.0121539	0.0869125	0.617185	6.6221e-09
XLOC_038422	0.0525871	0.0447073	0.662674	5.63616e-31
RP11-844P9.1	0.023755	0.0383953	2.10636	7.67566e-24
RP11-396F22.1	0.441589	0.158338	0.993803	1.43726e-20
RP11-44N21.1	0.202004	0.484698	2.38735	1.48387e-26
LINC00936	0.907368	1.04021	4.3475	1.95398e-19
LINC00622	0.371825	0.538797	3.40319	9.68319e-28
RP11-684N3.1	0.0645089	0.430891	3.50149	9.43677e-21
RP11-81K13.1	0.00257148	0.0342769	0.564617	1.19467e-30
RP11-466A19.1	0.0507428	0.0815721	0.530755	7.58887e-23
DEAR	0.228974	0.192066	1.15326	6.60845e-14
RP11-180N14.1	0.50583	0.413953	2.26856	4.33568e-13
CTD-2228A4.1	0.0197067	0.372058	3.31025	1.70133e-16
AC123886.2	0.196386	0.497368	3.02843	1.26973e-11
GBM_LOC004447	0.00615098	0.0264363	0.906839	1.4292e-20
RP11-863P13.5	0.0995903	0.141637	1.79313	2.28409e-14
LA16c-329F2.1	0.0840438	0.333773	2.26019	7.58311e-19
RP5-875O13.1	0.0681129	0.0806151	0.697792	2.88837e-27
LINCR-0002	0.292233	0.104067	1.56915	2.16828e-13
RP11-845M18.6	0.0323737	0.077272	0.742911	9.18219e-25
LINC01476	0.00810258	0.0399841	2.9128	2.06812e-21
RP11-586D19.1	0.0749435	0.19351	1.12441	6.86995e-13
Cabili_2690	0.0119266	0.0257634	0.800558	1.04099e-23
Cabili_2454	0.29632	0.038507	0.649042	1.49705e-37
RP11-301G7.1	0.0493981	0.088105	0.816963	5.55593e-11
RP11-145P16.2	0.00173939	0.0861452	1.84648	4.5306e-31
RP11-384O8.1	0.565099	0.513904	3.14891	7.14881e-15
CTA-228A9.3	0.549693	0.570184	4.02117	3.48413e-33
RP11-677O4.6	1.2552	0.438759	6.09856	1.3207e-32
RP11-389O22.1	0.359208	0.157917	0.632609	2.07351e-14
KB-1517D11.4	0.0531032	0.153564	1.55854	4.51329e-09
RP11-531A24.3	0.0166289	0.0973452	0.790063	3.8346e-12
LINC01007	0	0.0161352	3.00856	7.1751e-15
RP6-65G23.3	0.683349	0.840716	4.97349	4.29115e-25
RP11-20G13.2	0.167904	0.0349773	0.661587	5.17419e-10
RP11-466M21.1	0.165016	0.286336	4.40244	1.46818e-18
RP11-95O2.5	0.850017	2.40852	14.9649	2.46645e-19
CTD-2176I21.2	0.232652	1.31913	6.51771	2.17557e-10
RP11-710C12.1	0.198894	0.324617	2.19062	2.96561e-17
RP11-268J15.5	1.85505	0.971196	5.15679	7.3029e-36
GBM_LOC029519	0	0.0123594	0.961535	1.31317e-17
CTD-2168K21.2	0.152318	0.320253	2.41947	1.46395e-08
CTC-344H19.4	0.150454	0.19077	1.30801	6.06023e-26
Cabili_2534	0.26943	0.546585	2.94035	6.31272e-22
RP11-434B12.1	0.723669	1.61101	9.35878	1.23173e-25
RP4-809F18.2	0	0	0.617437	5.12286e-21
RP11-64K12.10	0.162807	0.569595	2.88323	1.37836e-17
AC084809.3	0	0.0526116	0.620331	2.91725e-19
C21orf128	0.0378341	0.116194	0.766015	9.02836e-09
AC011995.1	0.0103458	0.051949	1.22101	4.10199e-17
RP1-212P9.3	0.279152	0.293912	1.72643	3.44045e-20
TUNAR	0.193438	0.623253	8.4764	9.70371e-23
RP11-13K12.5	0.164987	0.294934	3.02122	2.8075e-13
RP3-414A15.2	0.0876181	0.114807	0.565617	2.41765e-29
LINC01106	0.0610869	0.129681	2.66644	3.09929e-18
RP11-439M11.1	0.0487476	0.084507	0.844877	2.03114e-18
GBM_LOC002416	0.309584	0.65273	2.66732	3.08418e-21
RP11-355I22.2	0.311175	0.946806	6.56105	4.21526e-23
LY86-AS1	0.1485	0.312274	4.07655	1.06177e-11
GBM_LOC014772	0.0438354	0.0546275	0.578689	1.54475e-37
RP1-46F2.3	0.0939682	0.090693	1.08059	3.4408e-11
RP11-923I11.3	1.53861	3.00685	18.1685	2.91971e-22
MIR7-3HG	0.817375	1.48316	9.21279	3.75135e-12
RP11-168K9.2	0.000533133	0.007928	0.601005	1.6073e-28
DLGAP1-AS4	0.206865	0.410742	9.23236	3.974e-25
RP13-895J2.8	0	0.297585	2.27826	3.72296e-18
RP13-895J2.2	0.0208049	0.060916	0.696826	5.94892e-20
RP13-895J2.7	0.0582097	0.301284	5.33314	9.93699e-25
Cabili_392	0.470858	1.28736	6.90819	2.93351e-23
RP11-44N21.4	0.0896587	0.24194	1.53849	2.51484e-16
RASGRF2-AS1	0.116976	0.208491	1.66907	5.97159e-19
RP5-827C21.2	0.00699675	0.0235142	0.80053	3.00664e-36
RP11-245P10.4	0.0567368	0.185535	0.84103	1.28189e-25
AC000403.4	0.180168	0.197771	0.916374	1.00982e-18
CCDC147-AS1	0.697234	0.564005	2.44633	5.20966e-21
TMEM191A	0.561978	0.318305	4.08653	1.59394e-26
RP11-123M6.2	1.27181	0.899765	26.962	6.5604e-42
RP11-696P8.2	0	0.0939177	2.83523	2.03482e-13
RP3-414A15.10	0.216141	0.125806	0.527654	1.86257e-13
STXBP5-AS1	0.381657	0.826169	4.61527	1.634e-12
MIR4500HG	0.233742	0.637215	3.98626	1.13271e-22
RP11-369E15.3	0.0795438	0.150585	1.36302	1.28475e-09
RP11-662M24.2	0.817522	4.33171	47.845	3.95958e-15
GBM_LOC030529	0	0.016085	0.711223	1.13937e-14
AC009487.4	0.0292923	0.0748924	1.69908	4.22663e-18
AC009487.5	0.156771	0.455407	7.56898	3.63161e-19
RP11-539I5.1	0.321713	0.104058	1.98598	1.11344e-19
GRM5-AS1	0.416698	2.20469	14.7941	8.81126e-20
RP11-665J16.1	0.0894773	0.0510292	0.507404	8.05378e-14
RP11-742D12.2	0.532261	0.230763	1.77306	1.52724e-18
LINC00594	0.0903128	0.532963	3.41676	1.13961e-24
LINC01197	0.531877	0.377108	2.49517	3.82922e-25
RP11-673C5.2	0.119543	0.178761	3.57823	1.37098e-27
Cabili_720	0	0	0.517638	2.70287e-20
RP4-765H13.1	0.000901197	0.0024933	0.649838	3.03716e-23
RP11-520H14.7	0.148614	0.256267	1.04309	2.12819e-32
LINC00599	0.90369	4.1891	29.1757	7.74515e-20
RP11-4N23.4	0.305124	1.67901	24.3991	1.76277e-23
RP11-597M12.1	1.2057	5.65682	28.1305	5.00023e-21
AC011288.2	0.00232752	0.0519633	0.571065	3.13514e-11
LL22NC03-13G6.2	0.0180343	0.0183514	0.721199	1.45349e-15
CNTN4-AS1	0.0436624	0.100425	0.556737	1.48916e-16
RP11-254A24.2	0.00905705	0.0858194	0.538448	4.69108e-16
RP6-91H8.1	0.00368659	0.00943273	0.683295	6.06023e-26
RP6-91H8.5	0.0144513	0.0298729	1.02243	5.76287e-27
GBM_LOC000714	0.019193	0.0569634	0.987398	1.06067e-19
RP11-33M22.2	0.039468	0.089464	0.75701	1.60115e-27
CTD-2062F14.3	0.824111	0.60938	4.29366	2.34169e-25
RP5-1063M23.1	0.0396321	0.0396068	0.509926	6.50089e-17
MIAT	1.48925	4.38102	44.1767	2.14785e-25
RP11-140A10.3	0.390663	1.29139	5.22248	1.05712e-27
Cabili_1257	0.0315483	0.0348056	1.53276	1.3882e-21
RP11-4N23.1	0.0674538	0.26049	3.68829	1.65961e-25
CTD-2527I21.5	0.0136791	0.0289661	0.535334	1.60837e-27
LINC00507	0.031391	0.0290552	6.92023	1.21466e-23
RP11-845C23.3	2.91652	2.97834	14.5891	1.27082e-18
RP11-260A9.6	0.00287925	0.0974648	0.687665	9.08237e-15
RP11-429A20.4	0.0713441	0.0948977	0.943993	2.5435e-31
ZRANB2-AS1	0.362395	0.424697	1.90881	6.14457e-28
PP14571	0.210691	0.209178	2.08982	3.39931e-26
RP11-762H8.4	7.49609	7.37037	45.9575	5.77663e-33
GBM_LOC000128	0.0252477	0.176235	0.83384	3.03716e-23
RP11-345N11.1	0	0.296027	1.29527	5.03733e-13
GBM_LOC017115	0	0	1.27683	7.59759e-23
RP11-809C18.3	0.339454	0.804358	3.35912	2.13228e-08
CTA-929C8.8	0.00166374	0.046463	0.551848	6.07334e-21
RP3-395M20.2	0.0203932	0.180047	1.35258	3.9194e-28
RP3-395M20.3	0.0263866	0.178015	1.38118	2.80945e-34
RP11-863P13.6	0.0442046	0.119878	6.22914	1.07002e-13
RFPL1S	0.768106	2.07153	13.6563	1.029e-17
HTR5AOS	0.0649303	0.187351	2.05433	1.55032e-10
RP11-794G24.1	0.0445936	0.0464763	1.38156	1.17645e-34
RP11-234K24.3	0.103216	0.226608	2.41447	8.65137e-24
RP11-12M5.3	0.0220781	0.0733417	0.979924	1.43429e-17
RP11-66D17.5	0.433345	0.561447	2.45743	3.94396e-29
RP11-863P13.4	0.0670191	0.113749	1.46748	5.54021e-15
RP11-100M12.3	0.0632155	0.224813	2.67458	2.82241e-23
GBM_LOC007636	0	0.0731058	1.50787	2.19368e-18
LINC01511	0.035236	0.0404176	0.528862	1.46395e-08
CTD-3193O13.1	0.577541	0.465601	2.54161	1.11207e-13
RP11-95O2.1	0.0445864	0.1576	0.969941	3.17908e-23
RP11-13K12.2	0.092354	0.0927109	0.713189	3.1879e-14
RP11-13K12.1	0.0911189	0.118902	0.91221	2.42198e-11
CTA-373H7.7	1.11295	3.5522	28.9008	1.42865e-21
RP11-497E19.1	0.0362987	0.0614389	1.22847	6.80043e-28
AC061961.2	0	0.12602	1.00182	6.24894e-15
GBM_LOC001601	0.0254279	0.11813	0.519412	5.94326e-23
RP11-335O13.7	0.124911	0.0928963	0.684516	1.13882e-24
LINC00957	1.91573	0.942136	6.404	5.17305e-21
AL132709.1	0.124881	0.0497888	0.719638	2.18709e-22
CTD-2547L24.3	0.108518	0.10929	0.509646	2.05292e-24
C16orf3	0.179412	0.162953	0.655595	5.11998e-22
RNF144A-AS1	0.217481	0.265217	4.78758	1.31674e-23
GBM_LOC038375	0.0220158	0.0488125	0.504494	2.07351e-14
RP11-598F7.6	0.769643	1.09198	4.90707	2.62722e-14
RP11-215H22.1	0.0150937	0.11325	2.09444	9.07615e-26
SNHG23	1.56607	0.725879	4.16588	5.91167e-26
RP11-272L13.3	0.04403	0.0579294	1.65118	5.91399e-34
GBM_LOC046481	0.0463573	0.122797	0.749549	2.17177e-16
CTD-2562J17.4	0.0587296	0.100229	1.86956	6.10096e-26
RP4-564M11.2	0.0262086	0.0281027	0.59157	4.67496e-32
Cabili_1982	0.209577	0.231152	1.59224	4.16258e-18
RP1-34H18.1	0.0691821	0.394406	1.86047	5.50944e-15
LINC01166	0.00949944	0.0910361	0.590433	8.73573e-19
RP11-981P6.1	0.162698	0.223815	0.965394	3.47226e-38
RP11-1060J15.4	0.263618	0.194581	0.861912	5.67772e-22
RP11-416N2.4	0.319305	0.463564	3.74978	1.76925e-31
RP11-1060J15.9	0.478789	0.219376	0.90346	1.12515e-23
RP11-122K13.14	0.0412307	0.1811	2.45269	1.04673e-16
LINC01018	0.207267	0.284317	2.15531	4.9759e-15
LINC00941	0.519416	0.0740168	0.352598	2.29653e-11
RP11-406A9.2	0.00873439	0.0183855	0.89348	2.55053e-16
RP11-88L24.4	0.0320749	0.225875	0.97014	5.35649e-11
AC137723.5	0.0753845	0.158645	0.967094	1.61979e-23
RP11-286B14.1	0.138596	0.353176	12.4378	4.47484e-28
RP11-85O21.2	0.108373	0.158931	0.697237	6.6355e-12
CTD-2240J17.1	0.00885388	0.132839	0.54274	7.77341e-13
RP11-81H3.2	0.030692	0.154655	0.843883	4.30566e-09
RP11-265D17.2	3.05635	0.816846	6.10771	3.67116e-30
SLC26A4-AS1	0.443652	0.974763	9.18315	3.22784e-16
RP11-321E2.3	0.0367419	0.349392	7.31585	5.25733e-17
RP11-361L15.5	0.262601	0.392814	8.09747	5.49279e-43
RP11-165E7.1	0.0903193	0.122199	0.876479	1.52222e-32
GBM_LOC002991	1.01248	0.257396	1.33498	2.50195e-17
RP11-1406H17.1	0.0671303	0.329983	1.32577	1.09676e-11
RP11-66B24.9	0	0.0794469	1.28991	6.42345e-22
RP11-66B24.1	0.0674243	0.118308	0.868811	6.08168e-13
PP12613	0.0249381	0.0414925	0.628641	1.18197e-13
LINC01164	0.00965696	0.0161007	0.853344	1.2887e-24
AC005009.2	1.12571	2.90519	12.7054	2.11727e-16
RP11-29G8.3	0.0159361	0.0813937	1.05859	5.3544e-34
GBM_LOC045051	0.135043	0.128011	0.922813	1.06694e-09
C1orf132	0.198818	0.270607	1.09679	1.2887e-24
LINCR-0003	0.0943499	0.234414	3.83416	2.88187e-16
RP1-212P9.2	0.210892	0.287764	2.55608	1.43564e-19
TRHDE-AS1	0.0233521	0.41029	3.53296	1.1754e-18
RP11-454P21.1	0.0315109	0.155757	0.770995	2.4393e-07
RP11-100E13.1	0.868841	0.139839	1.20703	1.21466e-23
RP11-826N14.2	0.0304048	0.0517374	0.948939	5.25733e-17
RP11-438B23.2	0.0149196	0.040754	0.909385	1.53779e-16
RP11-386G11.5	0.340475	0.265569	3.99693	5.9581e-31
RP11-386G11.3	1.66586	6.00779	121.093	8.16362e-23
RP11-317P15.5	0.734893	0.675348	3.13607	3.14092e-15
CTD-2555A7.2	0.0773772	0.324278	1.32004	2.3897e-18
RP11-210K20.5	0.079163	0.172473	1.0803	1.31674e-23
RP11-497E19.2	0.119772	0.170121	2.19203	8.83745e-28
LINC01140	0.63017	0.474046	2.99201	2.91971e-22
PWRN1	0.00917348	0.105635	1.34601	1.54024e-26
RP4-784A16.5	0.0657175	0.131696	1.09604	6.13259e-22
XLOC_009110	1.74555	0.878196	4.83791	4.7989e-23
MAPT-IT1	0.0782641	0.235074	0.952983	3.63996e-21
RORB-AS1	0.120653	0.128877	0.541337	2.96492e-14
KRTAP5-AS1	0.0950924	0.203194	2.88504	3.10047e-31
RP11-338K17.6	0.153547	0.196952	0.933079	5.58587e-28
RP11-986G18.2	0.062531	0.126087	0.587515	6.24894e-15
RP1-269M15.3	0.107373	0.361231	3.83077	7.89868e-15
GBM_LOC012151	0.0222083	0.0972638	2.31781	1.90097e-25
RP11-108M9.3	0.0870415	0.0687475	0.516136	4.0752e-24
RP11-562L8.1	0.00161046	0.0446657	0.860812	3.64552e-27
RP1-41C23.2	0.904326	6.47641	29.0901	4.1243e-25
CTC-304I17.5	0	0.0363867	0.555917	6.87653e-18
RP11-806L2.2	0.0988356	0.111777	0.725887	3.974e-25
AC011516.2	0.0196516	0.170973	1.30665	4.4776e-12
CTD-2527I21.4	0.219334	0.711113	4.19106	1.23856e-17
RP11-389G6.3	0.0411029	0.313338	2.54887	2.13863e-14
CTC-467M3.2	0.902363	1.08586e-41	0.194681	0.00741863
BX255923.3	0.154391	0.0302837	1.10834	6.93984e-20
CTD-2184D3.6	0.304191	0.631015	2.99004	6.91532e-22
MIR124-2HG	0.24803	1.86905	8.47508	1.06478e-17
RP11-29P20.1	0.0239103	0.12633	1.01952	1.76277e-23
LINC00951	0.296081	0.322835	1.66399	4.89797e-17
GBM_LOC031963	0.0230263	0.15319	0.634696	9.78849e-12
RP11-344E13.3	0.442269	0.146511	0.591619	7.86438e-20
Cabili_1126	0	0	0.546172	2.62402e-14
AC140542.2	0.0161029	0.0459849	1.48906	3.05081e-20
Cabili_786	0.0517714	0.103147	0.704922	7.1015e-18
CTD-2020K17.1	0.765669	0.676291	2.78662	6.06023e-26
LINC00460	0.262387	0.0976963	2.04935	1.54576e-17
RP11-728G15.1	0.0853085	0.396707	5.23659	8.9686e-21
RP11-687F6.5	0.107218	0.233288	1.0418	2.87969e-29
RP11-672L10.2	0.0283329	0.0211423	0.82367	3.8899e-23
RP11-829H16.3	0.358563	0.216909	0.976592	5.11206e-20
RP11-375B1.3	0.130002	0.0923885	0.745214	4.74154e-12
RP11-286N22.16	0.02223	0.0252925	1.02217	3.51819e-33
GBM_LOC035841	0.0282223	0.0411413	0.576342	4.23876e-21
RP11-677M14.2	0.673397	0.794294	13.4772	2.91971e-22
RP11-13A1.1	0.0743138	0.0681951	0.844275	4.22966e-22
AC067969.2	0.050835	0.173557	0.824334	2.8739e-11
GBM_LOC038848	0.111104	0.186728	1.08278	1.73901e-12
RP11-467C18.1	0.139317	0.103922	0.511601	3.10266e-13
RP11-713C5.1	0.133459	1.30832	6.47274	7.64161e-18
AP000438.2	0.22924	0.752267	4.33788	3.93432e-15
RP11-416I2.1	0.0454958	0.157798	3.591	7.41223e-15
RP5-827C21.6	0.0747689	0.149001	3.42881	9.1491e-41
LINC01123	0.0137693	0.0489483	1.73702	1.04564e-22
XLOC_054393	0.0106683	0.0406937	0.871861	8.07477e-20
GBM_LOC005204	0.0149304	0.0284218	0.990939	1.55507e-17
CTB-78F1.1	0.034896	0.0534669	0.744112	1.68283e-10
RP11-320H14.1	0.786285	1.46231	12.3663	3.36558e-13
LINC01234	0.308138	0.435186	1.86288	1.3974e-11
Cabili_858	0	0	0.598794	6.77836e-21
RP11-379F4.4	0.741602	0.631169	3.71498	1.37671e-15
RP11-202H2.1	0.00109731	0.164622	0.907533	1.95776e-12
RP11-982M15.6	0.0526233	0.117769	0.739037	3.85395e-18
RP11-982M15.7	0.0581723	0.0684156	0.767301	2.69339e-16
RP11-1026M7.2	0.0131836	0.0257047	0.501343	9.70291e-14
GBM_LOC026482	0.0142981	0.0472318	0.866263	3.36732e-31
RP11-96C23.10	0.174835	0.132371	0.535166	8.26722e-37
RN7SL1	312.699	91.8855	471.058	6.90016e-15
RN7SL3	1.00481	0.633213	9.4902	1.12701e-33
RP11-17E3.1	0	0.137661	0.876283	3.73586e-20
RP11-283I3.2	0.123157	0.121067	0.503568	5.13325e-17
AC006946.16	0.0933326	0.114941	0.547744	4.69108e-16
RP11-16K12.1	0.0677647	0.304657	1.24023	2.91465e-15
AL450992.2	0.783632	0.528699	4.50007	1.09772e-20
RP11-66B24.4	0.491272	0.462267	3.70649	1.14079e-22
MIR29B1	0.402294	0.260209	1.42673	6.59927e-18
Cabili_1800	0	0	1.96134	7.03118e-17
PART1	0.645313	0.732543	4.73245	2.35777e-11
Cabili_2474	0.372612	0.50259	2.65366	1.38062e-21
LINC01529	0.149141	0.129428	0.55947	6.74984e-20
RP1-240B8.3	0.0218031	0.259709	1.81004	2.45455e-18
GBM_LOC020835	0.0265064	0.0371481	1.20993	5.07649e-20
GBM_LOC020834	0	0.0452557	1.18864	1.32337e-17
U62631.5	0.0553821	0.209451	1.71708	1.62417e-15
CTD-3162L10.1	0.287928	0.146092	0.761295	3.94396e-29
RP11-479J7.2	0.458892	0.0741742	0.622125	8.09588e-17
AC010731.4	0.207068	0.14429	0.662494	2.07357e-05
RP11-247C2.2	0.0496803	0.076526	1.06896	1.60452e-26
GBM_LOC009824	0	0	0.532051	8.82599e-25
RP11-317N8.3	0.0766858	0.126765	1.04947	5.60126e-30
RP11-605F22.2	0.0679036	0.0820289	0.54547	5.00023e-21
CTD-2058B24.2	0.048359	0.153578	0.619492	6.04913e-13
RP11-461L13.3	0.109854	0.185746	1.53127	3.19598e-21
GBM_LOC033792	0	0.0972866	0.71642	1.63191e-15
ATP1B3-AS1	0.185479	0.205342	0.9546	8.67779e-20
RP11-298E9.6	0.024718	0.0406258	0.896833	3.08418e-21
