# Supplementary material for: Expression of lncRNAs in Low-Grade Gliomas and Glioblastoma Multiforme: An In Silico Analysis
Source: PLoS Med. 2016 Dec 6;13(12):e1002192. doi: 10.1371/journal.pmed.1002192 (PMC5140055; doi:10.1371/journal.pmed.1002192)
Supplement: S3 Table — (XLSX) [file pmed.1002192.s006.xlsx]

## Sheet: ATRX
lncRNA	Mutation median FPKM	WT median FPKM	FDR
RP11-258F1.2	1.31194	3.35821	3.16089e-57
AC068057.1	0.432273	4.45645	1.14494e-50
TPTEP1	43.5585	1.97867	4.63857e-42
GRPEL2-AS1	1.01899	1.82653	3.13917e-35
RP11-38P22.2	1.8379	6.79299	1.15825e-33
RP4-789D17.3	6.45167	4.15159	1.44939e-31
Cabili_360	0.181795	1.54097	7.29387e-29
RP11-134G8.10	1.35852	3.75789	1.15262e-27
RP11-421L21.3	8.50507	4.72083	1.35312e-27
RP11-181G12.2	2.83387	1.54499	8.62316e-27
RP11-804H8.6	1.51702	0.814856	1.0919e-25
C14orf23	0.640825	2.3271	2.38771e-24
CTB-32O4.3	0.994625	0.423826	1.16662e-23
RP1-184J9.2	0.66689	0.435092	1.92788e-23
RP5-1042I8.7	2.72161	1.42943	1.92788e-23
GBM_LOC028290	3.74227	1.05561	2.17071e-23
Cabili_2815	11.9214	6.13128	1.58362e-22
NFIA-AS2	8.98339	3.05811	3.32918e-22
AC011330.13	1.69904	3.09033	1.91158e-21
LINC00519	1.52993	0.595268	3.26799e-21
RP11-54O7.17	3.0324	0.900385	7.8058e-21
RP11-82L18.2	1.30781	3.25844	8.36183e-21
CHL1-AS2	0.862224	2.44635	1.02643e-20
RP4-773N10.4	3.38599	2.26209	1.41485e-20
RP11-467L24.1	1.47352	0.281182	7.2894e-20
RP11-527D7.1	0.687603	2.77431	1.00972e-19
CTD-2002J20.1	1.06386	0.508764	2.05947e-19
RP1-159A19.4	1.42629	0.619792	1.65442e-18
ARSD-AS1	1.60668	3.23731	1.66442e-18
WDR11-AS1	3.67909	1.41391	3.20179e-18
RP1-20B21.4	50.9778	33.3393	3.89087e-18
GBM_LOC039777	1.146	0.496036	4.9028e-18
CBR3-AS1	3.61998	5.36652	5.77325e-18
RP4-797C5.2	10.2073	4.70401	5.83322e-18
RP1-239B22.5	0.832197	1.73173	8.66843e-18
AP000439.1	1.04359	0.438516	1.13654e-17
Cabili_1019	6.46418	4.33733	1.65411e-17
LINC01355	1.22639	0.625408	1.65411e-17
RP4-789D17.5	2.0108	1.18898	2.45166e-17
RP11-196G18.24	7.49122	4.04642	3.31344e-17
SZT2-AS1	3.73381	2.61101	5.40075e-17
RP11-56P23.1	2.50624	1.75792	6.65685e-17
RP11-345P4.9	20.4927	14.4701	6.90043e-17
CTD-2085J24.4	3.36059	2.30277	6.90445e-17
SNAP25-AS1	0.863944	2.21348	6.90445e-17
KIAA1614-AS1	0.774801	1.29941	7.57281e-17
FBXL19-AS1	0.348997	0.683962	7.57281e-17
LINC01356	0.885068	0.45483	7.75923e-17
CTC-490E21.11	1.62076	0.86152	1.61832e-16
CTD-2194A8.2	2.21606	0.902861	1.61832e-16
Cabili_2240	5.2093	8.71016	2.07281e-16
SNHG18	0.376453	0.906299	3.23145e-16
RP4-671G15.2	1.22958	0.728193	3.42638e-16
Cabili_1332	7.42652	3.74007	3.42638e-16
RP11-244H3.1	1.37075	0.900844	3.62669e-16
RP11-109P14.9	33.1848	23.1524	3.77524e-16
RP1-43E13.2	1.99535	1.17573	4.42427e-16
RNF219-AS1	9.93467	4.13162	6.87639e-16
FAM182A	10.8462	6.34503	8.10604e-16
LINC01411	0.501359	1.85634	1.04906e-15
RP11-31F15.2	0.863926	0.573225	1.67246e-15
RP11-337C18.8	1.71136	2.57114	1.95584e-15
FOXD1-AS1	11.3518	3.51887	2.61269e-15
CACNA1C-AS2	1.00697	0.60105	2.61269e-15
RP11-347E10.1	1.04174	0.260987	3.67124e-15
RP11-552M11.8	0.948751	0.668757	3.67124e-15
RP11-823E8.3	1.6995	3.47593	5.41065e-15
LINC00853	0.4982	1.07831	5.60181e-15
LINC00662	11.5128	7.77752	7.47531e-15
RP11-350N15.6	1.29259	2.01058	8.02181e-15
RP11-195F19.30	0.338701	0.82393	1.2283e-14
RP11-807H17.1	1.61301	0.426145	1.65563e-14
KDM4A-AS1	10.7468	7.45484	1.67056e-14
Cabili_2847	0.365465	1.45031	1.67056e-14
AC002398.13	2.95277	2.08556	1.92347e-14
RP11-480C22.1	6.39805	3.40657	1.92347e-14
RP11-196G18.22	2.90695	1.69122	2.40805e-14
CTC-490E21.10	1.00093	0.665245	2.60107e-14
RP4-728D4.2	0.749958	0.432343	2.64483e-14
RP4-614O4.11	1.13389	2.23536	2.99676e-14
CTB-119C2.1	0.654012	1.3896	3.31004e-14
RP11-61L14.6	5.04957	12.5837	3.33486e-14
RP5-1031D4.3	1.76845	0.909539	4.22618e-14
RP11-158M2.3	19.0299	13.3351	4.29976e-14
RP11-109D20.2	4.61252	3.03589	4.48701e-14
PCED1B-AS1	16.6375	8.42481	4.7873e-14
SNHG11	7.04446	11.623	5.20531e-14
RP11-152N13.16	0.477859	0.778317	5.51912e-14
RP11-337C18.10	1.231	1.91446	6.212e-14
RP11-54O7.16	1.74198	0.715059	7.41969e-14
RP11-776H12.1	0.727981	0.364583	1.465e-13
LINC01105	6.83146	12.7469	2.08203e-13
CTD-2267D19.3	0.374334	0.756291	2.18548e-13
LINC00310	1.83421	0.834937	2.26612e-13
RP1-111D6.3	2.81065	0.841109	2.29862e-13
CTD-2152M20.2	1.27114	2.24073	2.29862e-13
RP5-858L17.1	2.98414	4.40413	2.42751e-13
CDIPT-AS1	0.324819	0.650657	3.46147e-13
LINC01088	124.002	41.0086	3.5469e-13
RP11-264M12.2	3.35538	5.02753	4.62399e-13
CTB-51J22.1	0.878421	1.64996	4.8257e-13
RP11-817I4.1	0.570406	0.90677	5.80941e-13
RP11-229P13.23	12.7217	24.4928	5.91798e-13
RP11-143A12.3	0.444036	0.778478	8.10825e-13
LINC01006	8.83961	4.93983	8.58994e-13
TIPARP-AS1	1.05021	1.51037	9.6928e-13
RP4-717I23.3	13.148	8.37884	1.0368e-12
AC009005.2	1.46944	0.697055	1.06278e-12
SCOC-AS1	1.06336	1.70456	1.40042e-12
RP11-363E7.4	0.786295	1.19569	1.47011e-12
RP1-111D6.2	2.00014	0.704749	1.48909e-12
RP11-185E8.2	4.36216	3.01412	1.50391e-12
AC004837.4	0.754143	0.459379	2.01273e-12
AC003102.3	0.458993	0.75622	2.21536e-12
RP11-344B5.2	2.72516	1.35686	2.7114e-12
AC016738.4	0.525856	0.90358	3.192e-12
AGAP2-AS1	5.01037	9.36992	5.3402e-12
RP11-98D18.1	1.69897	3.55434	5.64382e-12
RP4-798A10.7	5.05058	3.28431	5.85318e-12
LINC00906	1.22237	0.439943	6.75007e-12
RP11-124N14.3	114.397	49.8625	7.14398e-12
C21orf88	1.40109	0.816129	7.45209e-12
RP11-388P9.2	0.609087	1.32139	7.77354e-12
AC083864.3	1.80545	0.74789	7.92352e-12
RP11-396C23.2	0.363007	0.657912	1.51852e-11
RP1-167F1.2	1.25914	0.626698	1.53568e-11
LINC01159	0.774774	1.21372	1.53568e-11
LINC00960	2.28229	0.964223	1.59229e-11
RP4-798A10.2	1.08678	0.720067	1.75638e-11
LLNLR-268E12.1	1.65614	1.13282	1.83156e-11
HCG22	1.5745	0.475478	1.85636e-11
RP11-733O18.1	0.769417	0.419995	1.86558e-11
C10orf85	3.77043	1.9761	1.91262e-11
RP11-455B3.1	0.315453	0.859956	2.12323e-11
AC009404.2	0.623541	0.94884	2.35519e-11
LINC01114	1.33016	2.04051	2.35519e-11
CTB-147N14.6	2.71457	1.49648	2.44212e-11
SNHG3	7.25054	5.06677	2.62709e-11
RP11-506K6.4	0.796343	0.481314	2.72402e-11
RP11-365O16.3	1.44865	0.654161	2.79161e-11
RP11-307C18.1	0.929654	0.583899	2.79161e-11
MIR223	1.3825	0.727673	3.00283e-11
RP11-21L19.1	15.6987	9.39138	3.07882e-11
GBM_LOC026870	0.771695	0.318766	3.17462e-11
RP11-579D7.4	1.01754	1.51954	3.2368e-11
CTD-2510F5.4	2.40157	1.44885	5.00781e-11
RP4-575N6.4	1.87433	1.19178	5.41336e-11
FZD10-AS1	0.363283	0.743839	6.52118e-11
RP11-839D17.3	0.374404	0.679859	7.72138e-11
RP11-713P17.3	3.8353	5.84882	8.25003e-11
MIR124-2HG	1.26118	2.66803	8.81332e-11
RP4-791M13.3	2.10322	1.25591	9.23576e-11
RP11-594N15.3	0.603659	0.969855	9.4152e-11
RP11-318C24.2	0.669491	0.408134	1.12587e-10
RP11-15I11.3	0.896254	0.389571	1.15409e-10
RP11-245J24.1	0.432118	1.19505	1.32369e-10
LGG_LOC007388	0.736078	0.462843	1.33107e-10
LGG_LOC030946	1.31864	0.624857	1.52615e-10
RP3-467L1.4	1.06888	0.65149	1.52634e-10
LINC01135	0.718526	0.468215	1.68859e-10
CISTR	0.474295	0.89132	1.71203e-10
ST7-AS1	3.63074	2.48193	1.72171e-10
DDX11-AS1	0.734344	1.1715	1.77442e-10
RP11-834C11.4	5.85213	3.34972	1.80897e-10
RP11-264A11.1	1.02188	0.327126	1.81932e-10
AC009948.5	4.51943	6.44493	2.10713e-10
Cabili_1318	0.547379	0.974249	2.21382e-10
GRIK1-AS1	0.494087	0.803599	2.46092e-10
RP11-598F7.6	0.529913	1.53451	2.47516e-10
RP11-341G23.4	1.03144	0.507823	2.62867e-10
VLDLR-AS1	0.493463	0.783239	2.79172e-10
RP4-785G19.5	0.750318	0.432959	3.01312e-10
AC006129.2	1.16	0.606177	3.10513e-10
AC009892.10	0.771483	0.477245	4.04202e-10
RP11-1049A21.2	1.12654	0.520517	4.06591e-10
UG0898H09	21.8099	12.2251	4.16722e-10
RP11-556E13.1	1.32895	0.731693	4.4245e-10
RP11-436K8.1	1.32607	0.756261	4.91197e-10
CTA-250D10.23	1.67994	1.02567	4.9151e-10
Cabili_2693	1.36304	0.530608	6.11445e-10
RP11-54O7.3	2.86137	1.45414	6.55433e-10
AC114803.3	0.83809	2.37019	6.71667e-10
LINC01415	0.668103	1.24183	7.08595e-10
RP11-441F2.5	3.5317	1.98641	7.09093e-10
HAS2-AS1	3.35026	2.08223	7.747e-10
RP11-83N9.6	0.827661	0.534594	7.75284e-10
RP6-65G23.3	0.565689	1.05262	8.07142e-10
LINC01431	1.43061	2.20762	8.27802e-10
RP11-231C18.2	1.49518	0.622037	8.48324e-10
RP11-489O18.1	1.48117	0.868484	8.49038e-10
GBM_LOC040061	0.282373	0.86233	1.03358e-09
AP000438.2	0.435801	0.975666	1.07029e-09
RP1-293L6.1	0.934867	2.6024	1.19766e-09
RP11-64K12.4	3.63096	6.19661	1.2774e-09
RP11-605F22.1	1.01648	1.60582	1.3624e-09
DKFZP434K028	1.61676	2.29766	1.41207e-09
CTD-2012M11.3	2.30057	0.763242	1.53992e-09
RP11-554A11.9	0.766398	0.458411	1.54153e-09
AC091177.1	1.1453	0.687978	1.68446e-09
RP11-190A12.8	0.429752	1.00456	1.81288e-09
CTC-510F12.6	3.02114	5.0886	1.94083e-09
MIR7-3HG	0.661501	2.60419	1.9886e-09
AC074212.5	3.36716	2.12549	1.99085e-09
Cabili_1476	2.27799	3.50024	2.09256e-09
RP11-362K14.7	1.75008	2.70713	2.09256e-09
GBM_LOC039120	0.893685	0.573035	2.09256e-09
LGG_LOC020514	0.659813	0.462853	2.33063e-09
RP11-16N11.2	1.2162	1.76573	2.36357e-09
RP11-61K9.3	1.83184	2.63931	2.39086e-09
LINC01102	2.52367	3.89605	2.97906e-09
SEMA3B-AS1	1.37849	2.43989	3.29864e-09
GBM_LOC006520	0.417853	0.924675	3.34933e-09
RP11-1105G2.3	1.00568	0.595923	3.6011e-09
GBM_LOC009981	0.420122	0.678443	3.81288e-09
RP11-6O2.4	17.5803	10.0924	3.81782e-09
RP5-1074L1.4	1.435	0.902299	4.12485e-09
CTB-31N19.3	0.671358	0.437835	4.31242e-09
BAALCOS	4.71005	8.03548	4.31242e-09
RP4-635E18.7	0.936865	0.590155	4.34013e-09
RP11-1C8.7	0.778682	1.69334	4.57136e-09
RP11-90P13.1	0.932711	0.532959	4.75428e-09
EXTL3-AS1	0.465847	0.732702	4.85238e-09
CTD-2616J11.2	2.09788	1.1685	4.85238e-09
RP11-799B12.4	0.78571	1.34294	4.88374e-09
LGG_LOC046950	0.993054	0.478957	5.05352e-09
GBM_LOC042318	0.510084	0.992266	5.09909e-09
RP11-31F19.1	4.0407	7.89171	5.13219e-09
Cabili_2207	0.964801	0.548102	5.66924e-09
Cabili_2248	0.981212	0.600237	5.83644e-09
AL450992.2	0.363667	0.750377	6.82006e-09
RP11-215G15.5	0.55847	1.18938	7.05564e-09
RP4-622L5.7	1.84754	1.24341	7.26286e-09
AC007319.1	1.27453	0.430262	7.4872e-09
RP11-549B18.1	1.51879	2.37971	8.15344e-09
RP11-750H9.5	3.45017	1.86742	9.56401e-09
RP11-357K6.1	1.74091	3.00761	1.08204e-08
Cabili_1493	13.2508	6.69249	1.63379e-08
Cabili_2748	0.818064	0.510594	1.76086e-08
VCAN-AS1	41.4289	27.5526	1.77221e-08
LHX5-AS1	0.374493	2.50443	1.79676e-08
RP11-312B8.1	1.23682	0.812633	1.84853e-08
RP11-74H8.1	55.1104	81.736	1.89251e-08
AC009303.2	0.904212	1.36308	1.96916e-08
RP11-552D4.1	12.2966	6.67685	2.00285e-08
AP001350.4	1.42925	0.891432	2.02571e-08
AC007620.3	31.5045	22.0315	2.24344e-08
FARP1-AS1	1.22143	0.769726	2.24368e-08
LINC00092	0.544833	1.13261	2.24368e-08
SBF2-AS1	0.464479	0.74162	2.24368e-08
AC002398.11	4.53697	3.1655	2.67136e-08
RP11-848P1.3	2.46294	1.53062	2.77453e-08
GBM_LOC026352	0.454838	0.646266	3.03843e-08
FLJ16779	29.2013	20.1147	3.29024e-08
AP005530.2	0.773094	0.423216	3.32766e-08
BAALC-AS1	5.11592	7.53662	3.42255e-08
STXBP5-AS1	0.605201	1.02271	3.74129e-08
RFPL1S	1.39996	2.66276	3.84773e-08
RP11-359E10.1	1.82377	3.31648	4.17788e-08
RP11-138I1.4	273.091	403.306	4.35838e-08
RP11-328J6.1	2.41621	1.40847	5.32118e-08
HAR1B	0.318956	0.641582	5.32118e-08
AC004540.4	45.1418	27.6692	5.90193e-08
WNT5A-AS1	0.702847	0.409994	6.10394e-08
LINC01268	1.46846	2.48984	6.34655e-08
LLNLR-470E3.1	1.59105	0.942001	6.70844e-08
RP11-307B6.3	3.27184	5.19077	6.8969e-08
CTD-2666L21.1	1.14115	1.81819	7.28175e-08
GRM5-AS1	1.185	3.00452	7.52129e-08
RP11-839G9.1	1.41904	0.844998	7.65993e-08
RP11-597D13.8	1.86939	1.0942	8.13323e-08
GBM_LOC025565	0.51047	0.755113	8.13323e-08
RP11-454H19.2	1.07695	1.58894	8.61914e-08
RP11-277P12.20	0.859604	0.54491	9.13328e-08
RP4-704D21.2	0.769065	0.478308	9.27926e-08
RP11-259K15.2	5.52289	3.0872	9.4056e-08
RP11-415J8.3	1.95445	1.25001	1.02053e-07
CTD-2540B15.7	7.25749	4.30165	1.02053e-07
RP11-65J21.3	0.49636	0.849188	1.02722e-07
GBM_LOC038759	0.405012	0.594976	1.04121e-07
CTD-2540B15.11	20.4145	13.1754	1.13371e-07
AC069363.1	2.82317	1.2602	1.15179e-07
RP11-140A10.3	0.964761	1.57711	1.20315e-07
CTB-129P6.7	1.35257	0.908127	1.30508e-07
RP1-257A7.5	15.3867	23.5836	1.30508e-07
HP08942	3.71782	5.58239	1.39389e-07
RP4-657D16.3	2.74989	1.89195	1.63406e-07
RP11-156L14.1	0.491035	0.800757	1.67475e-07
RP11-42O15.3	0.794096	0.557917	1.89769e-07
CH17-437K3.1	1.09563	0.750822	1.92713e-07
AC000032.2	4.07176	2.86527	1.97106e-07
SNORD64	1.42968	0.871619	2.05308e-07
RP11-317P15.5	0.400447	0.844942	2.06659e-07
AC002451.3	1.64509	0.93572	2.27601e-07
RP11-923I11.3	2.36802	3.76675	2.27601e-07
AC011524.1	1.38888	0.653051	2.44132e-07
RP11-159H10.3	1.30421	0.905188	2.60582e-07
GBM_LOC039900	1.45986	0.780599	2.63483e-07
GBM_LOC028297	1.95693	0.556	2.69447e-07
U82695.10	0.824136	1.2331	2.78044e-07
RP11-521C20.3	2.48932	1.50069	2.84908e-07
FUT8-AS1	0.680758	0.977595	2.95315e-07
RP11-273G15.2	0.636752	1.10293	3.22284e-07
AP000230.1	1.33915	2.01179	3.34015e-07
AC097724.3	3.9272	2.61318	3.46092e-07
RP11-517I3.2	25.2529	17.7317	3.55333e-07
CTD-2033A16.1	1.25472	1.83639	3.78068e-07
JMJD1C-AS1	1.65396	1.10444	3.93469e-07
RP11-5C23.1	1.25527	1.88867	4.14138e-07
RP4-545L17.11	1.23781	2.10573	4.16857e-07
RP11-429B14.4	7.57004	4.56905	4.24299e-07
RP11-395B7.4	0.616118	1.44683	4.27982e-07
MIR4674HG	0.570573	0.909142	4.5041e-07
RP11-930P14.1	1.08806	0.663006	4.5539e-07
TUNAR	0.332923	0.881958	4.6557e-07
LINC01094	21.3817	13.4134	4.68629e-07
CECR7	0.700491	1.34167	5.17654e-07
AF127936.5	1.39746	0.853317	5.18748e-07
AC133785.1	1.39817	0.880177	5.31434e-07
LINC00599	3.10275	5.71723	5.68934e-07
AC005754.7	0.672118	1.43217	6.05092e-07
IQCA1-AS1	0.718241	0.504133	6.35041e-07
CH507-39O4.2	0.789733	1.18921	6.36401e-07
GBM_LOC012292	1.93119	0.685908	6.5626e-07
LINC00689	6.94782	1.73264	6.93257e-07
CTD-2636A23.2	25.9213	40.3574	7.30635e-07
RP11-375N15.2	0.483654	0.734202	8.09566e-07
RP11-1191J2.2	0.479519	1.02608	8.16624e-07
CRNDE	2.22065	1.32271	8.7177e-07
LINC01141	1.16531	0.78471	9.00685e-07
VAC14-AS1	0.502892	0.837586	9.00686e-07
RP11-307C19.2	0.897954	1.46064	9.00686e-07
RP11-71E19.2	0.881636	0.573899	9.4892e-07
AC011558.5	10.9437	6.91619	9.78202e-07
MLLT4-AS1	0.4971	0.815056	9.99658e-07
RP11-1263C18.1	1.45866	3.09448	1.06218e-06
RP4-813D12.3	1.02847	1.456	1.27074e-06
AC005220.3	1.10031	1.85057	1.32091e-06
RP11-285F16.1	2.38455	3.52874	1.37006e-06
RP11-130L8.1	1.77998	1.16828	1.43628e-06
AC005330.2	2.10171	3.22671	1.45493e-06
FLJ35934	0.405054	0.634188	1.5415e-06
RP11-337C18.9	0.487786	0.691175	1.55823e-06
SLC6A1-AS1	0.878652	1.2703	1.66509e-06
CTC-471F3.6	0.82757	0.495565	1.66876e-06
CCDC147-AS1	0.396478	0.684158	1.74904e-06
CTD-2325P2.4	1.21771	3.0736	2.04255e-06
CTD-2291D10.4	0.636197	1.05559	2.201e-06
CTB-25B13.9	0.398201	0.619332	2.20589e-06
CTA-373H7.7	2.54935	4.72322	2.32553e-06
XLOC_060036	0.696773	0.469881	2.46176e-06
RP11-220C2.1	1.68929	2.45844	2.50378e-06
RP11-161H23.5	8.45954	12.3982	2.55782e-06
CTD-3116E22.8	1.43301	0.844199	2.5743e-06
GBM_LOC047199	1.01846	0.588848	2.692e-06
RP11-505P4.6	0.545604	0.811906	2.97223e-06
Cabili_2928	1.01038	0.587958	3.08742e-06
CTC-435M10.12	1.5742	1.07971	3.13984e-06
RP5-1119A7.17	1.88674	3.71487	3.39222e-06
U91328.21	1.15284	0.760683	3.39984e-06
LINC01341	1.66317	1.10354	3.50072e-06
LINC01351	6.72537	9.64059	3.55993e-06
FOXD3-AS1	1.29185	0.704907	3.81314e-06
ISX-AS1	0.0169971	1.01792	3.85347e-06
MIAT	3.38665	5.79261	4.12681e-06
RP3-523E19.2	0.991016	0.666194	4.3654e-06
RP11-44M6.7	2.73309	1.75045	4.53097e-06
RP11-18J9.3	0.754252	0.501477	4.54115e-06
RP3-486I3.5	1.9397	2.77929	4.63634e-06
RP5-1056H1.2	9.53584	6.48303	4.95199e-06
TBX2-AS1	10.4345	6.6663	4.98349e-06
AC068499.10	0.663027	0.954662	5.11998e-06
LINC01480	2.68065	1.64207	5.11998e-06
RP4-740C4.7	1.21435	0.831083	5.23864e-06
KCNK15-AS1	0.860687	1.37631	5.40398e-06
RP13-977J11.2	0.946669	0.567491	5.41617e-06
RP11-89G4.1	0.792983	0.542655	5.4284e-06
RP11-355I22.2	0.679348	1.17211	5.76427e-06
Cabili_523	1.10458	1.6121	5.76688e-06
PYCARDOS	1.63258	0.971456	5.76688e-06
RP11-8P11.3	0.980928	1.54133	6.48143e-06
CTD-2176I21.2	0.854112	1.81507	6.54903e-06
RP11-265D17.2	0.653288	0.962545	6.71187e-06
LINC00928	1.80019	1.05927	6.81097e-06
CTD-2527I21.4	0.41398	0.980339	6.97119e-06
LINC00936	0.831421	1.19911	7.95502e-06
LINC01150	0.918245	0.57689	7.9893e-06
RP11-73C9.1	2.93626	1.99726	8.1867e-06
RP11-632P5.1	1.22091	0.545015	8.19132e-06
Cabili_2865	0.469159	0.6893	8.62035e-06
AC093642.3	0.449136	0.766319	8.83279e-06
HAR1A	0.755745	1.3363	8.83798e-06
LINC01485	1.29836	2.14539	9.0041e-06
RP4-665J23.1	1.32238	2.62931	9.94532e-06
NOVA1-AS1	1.92755	1.25647	1.01146e-05
RP11-48B3.4	1.28537	0.894204	1.01785e-05
AC067969.1	0.798413	0.486524	1.0202e-05
RP4-683L5.1	0.503422	0.792948	1.02936e-05
RP11-624M8.1	5.91087	3.90678	1.14365e-05
GBM_LOC042831	1.60647	1.0014	1.19592e-05
RP11-1191J2.5	0.446606	0.656491	1.19592e-05
GBM_LOC014495	2.56707	4.00047	1.30635e-05
SATB2-AS1	0.684048	1.13244	1.31245e-05
AC004019.13	0.774832	1.13137	1.34434e-05
RP11-588K22.2	0.438404	0.730461	1.43886e-05
RP11-147L13.14	0.739712	0.518049	1.45128e-05
AP000688.29	0.384545	0.624261	1.59423e-05
GFOD1-AS1	0.813138	1.23664	1.59544e-05
RP11-66D17.5	0.705694	0.466463	1.6288e-05
Cabili_1378	1.94301	1.32451	1.69897e-05
RP11-867G23.10	0.369008	0.719784	1.74127e-05
ST3GAL6-AS1	1.67416	1.05555	1.76389e-05
Cabili_392	1.0105	1.52106	1.76389e-05
RP3-369A17.4	1.18973	0.679386	1.7923e-05
GBM_LOC031096	3.14361	4.8736	1.83968e-05
RP11-10L7.1	1.47826	0.82426	1.93812e-05
RP11-155G14.6	0.858877	0.601898	2.06635e-05
Cabili_2293	0.672874	0.382595	2.13213e-05
RP11-702H23.6	1.3072	0.867579	2.21649e-05
CTD-2201G16.1	1.09062	2.13661	2.34992e-05
HHIP-AS1	0.606802	0.865501	2.42293e-05
CXorf28	0.684571	1.45419	2.43444e-05
Cabili_1401	0.803464	1.32866	2.43444e-05
RP4-719C8.1	0.882167	1.29478	2.47322e-05
RP11-299G20.5	2.31415	1.45604	2.52822e-05
AC140912.1	0.847468	1.31717	2.58678e-05
RP11-946P6.4	0.446574	0.654532	2.69652e-05
RP11-299G20.2	0.859231	0.579742	3.00308e-05
RP11-446H18.6	0.744788	0.474763	3.07665e-05
LINC00639	1.10823	1.84057	3.14904e-05
RP11-809C18.3	0.496959	1.05262	3.27852e-05
CTD-2616J11.3	0.770581	0.529085	3.28627e-05
EMX2OS	2.15423	3.4831	3.37132e-05
RP11-352G9.1	0.607002	0.424448	3.41302e-05
GBM_LOC008405	1.45397	2.19916	3.41463e-05
BCYRN1	6.43705	10.1558	3.59336e-05
FOXP4-AS1	0.399081	0.600852	3.60187e-05
LINC00320	4.80903	7.36005	3.64301e-05
RP11-182J23.1	1.92091	1.12244	3.67416e-05
LINC00957	0.696403	1.13006	4.18153e-05
LINC01532	4.89281	2.83188	4.29898e-05
AC015936.3	18.4457	11.953	4.75869e-05
RP11-706J10.2	1.17817	2.23537	5.14438e-05
RP11-946L16.2	0.824152	0.446017	5.29495e-05
LINC01279	8.80944	5.9883	5.50042e-05
RP11-662M24.2	3.08581	5.86334	5.73883e-05
RP11-116N8.1	4.17136	2.90039	5.84105e-05
LA16c-325D7.2	0.562996	0.796976	6.26453e-05
RP11-48G14.3	1.05161	0.680168	6.44645e-05
RP11-401P9.4	16.7663	11.1511	6.5608e-05
CELSR3-AS1	0.606444	1.08539	7.98885e-05
RP11-238F2.1	1.59644	0.988959	9.04999e-05
RP11-97N19.2	1.6722	2.42771	0.000107769
PART1	0.499131	0.875086	0.000108273
LINC00609	0.640112	0.442166	0.000112991
RP11-439C15.4	2.60785	3.82818	0.00012074
FAM201A	0.856452	1.29239	0.000144653
RP11-379F4.4	0.444225	0.740665	0.000155641
PAQR9-AS1	0.464182	0.748033	0.000162516
RP11-482M8.3	0.481712	0.753575	0.000165672
RP11-676J15.1	3.38142	2.23068	0.000180795
XXbac-BPGBPG55C20.1	0.747046	0.516507	0.00019702
KBTBD11-OT1	0.541448	0.788428	0.000216227
RP13-298C8.3	0.580496	0.870634	0.000225895
RP11-67L3.5	1.63283	2.51106	0.000226935
RP11-154D6.1	39.2511	27.6169	0.000234898
RP11-47I22.1	2.26412	3.75946	0.000248341
AC016757.3	0.583693	0.962186	0.000261463
RP11-143K11.5	0.717195	1.11573	0.000273678
RP11-334A14.5	6.46674	4.39165	0.000283848
RP11-338N10.1	0.6725	0.465035	0.00029908
RP5-1007F24.1	3.14915	2.02496	0.000313876
LINC00087	1.83382	2.64958	0.000313876
MIR4500HG	0.765204	0.537181	0.000325842
RP11-17J14.2	9.87932	6.75571	0.000326226
AC012507.3	0.371244	0.647089	0.000326226
RP1-232L24.3	0.890041	1.32808	0.000333141
AC002429.5	1.69836	1.19663	0.000337505
RP11-597M12.1	4.24011	6.19405	0.00039096
RP11-236B18.5	1.28293	0.852894	0.000420974
RP11-320H14.1	0.862409	1.90513	0.000458125
CTD-2380F24.1	1.59877	2.50362	0.000475796
RP11-762H8.4	5.29709	9.01939	0.000478456
Cabili_134	2.38126	1.64797	0.000494634
KCNMA1-AS1	0.813693	1.1512	0.000585614
RP11-227B21.2	3.91858	6.03053	0.000591261
RP11-158M2.4	1.4043	0.905183	0.000703195
LINC00652	0.910315	1.31937	0.000737009
CH17-140K24.7	1.25107	1.91091	0.000753745
SATB1-AS1	2.86198	1.99747	0.00077209
RP11-61I13.3	3.16732	2.16851	0.00078685
RP11-160O5.1	2.357	1.64946	0.000978548
AC007009.1	0.583794	0.831974	0.00107179
GBM_LOC037098	0.800254	0.498818	0.00120728
CTC-458G6.2	0.818033	0.552762	0.00125895
Cabili_450	0.705794	0.484402	0.00126961
RP11-74E22.8	4.77517	7.09188	0.00133006
RP11-815J21.2	1.17924	0.825726	0.00138531
RP11-95O2.5	1.9177	2.89882	0.00154068
RNU6ATAC35P	0.597043	0.88161	0.00160613
SERTAD4-AS1	1.06184	1.51516	0.00163763
RP5-1028L10.1	0.296034	0.666107	0.00166972
Cabili_448	0.574837	0.90517	0.0016847
Cabili_2819	0.757434	0.504936	0.00207475
DKFZp434J0226	1.03375	0.503337	0.00212487
RP5-1177M21.1	3.80303	2.42966	0.00243123
RP11-29H23.4	0.723663	0.499654	0.00275115
GBM_LOC002313	2.28044	1.42229	0.00294686
RP11-386G11.3	4.07062	7.32371	0.00423158
RP11-403A3.3	3.94336	6.31148	0.00471625
RP3-395M20.12	0.51679	0.919932	0.00479526
RP11-185E8.1	0.845527	0.555318	0.00579947
RP3-460G2.2	0.684312	0.411672	0.00582316
RP11-211G3.2	1.67451	1.15864	0.00582316
RP11-123O10.4	0.811741	1.44809	0.00585944
RP11-403A3.2	0.840255	1.23591	0.00743977
RP11-383H13.1	1.21257	1.95265	0.00761773
RP11-123M6.2	0.714441	1.01486	0.00764834
RP11-677M14.2	0.569646	0.914646	0.00769397
RP11-384O8.1	0.368273	0.582854	0.00825512
CH17-360D5.2	0.957563	0.573486	0.0098056

## Sheet: CIC
lncRNA	Mutation median FPKM	WT median FPKM	FDR
RP11-135L13.4	80.4314	33.5248	2.51848e-30
NFIA-AS2	1.50858	7.10107	5.78408e-30
RP11-82L18.2	6.16481	1.76721	5.78408e-30
Cabili_2847	3.87823	0.490841	5.78408e-30
AC002398.13	1.39002	2.91357	8.61753e-29
AC068057.1	6.49486	0.871962	5.12052e-27
RP1-293L6.1	4.70326	0.964746	8.50481e-27
RP5-930J4.4	31.992	49.669	4.69604e-26
RP5-1042I8.7	1.16797	2.38995	4.69604e-26
CTB-119C2.1	2.1214	0.767699	2.67663e-25
CISTR	1.73624	0.513335	3.73179e-25
Cabili_1318	2.55107	0.555402	3.73179e-25
RP11-552M11.8	0.465545	0.896723	8.25958e-25
RP11-402D21.2	10.944	3.31615	1.25713e-24
RP11-357K6.1	6.02129	1.84259	5.57367e-24
RP11-74H8.1	147.955	54.3111	6.07598e-24
CH17-437K3.1	0.433672	1.07383	6.64826e-24
GBM_LOC042318	2.18342	0.537276	1.24159e-23
RP11-421L21.3	4.08194	7.4041	1.24159e-23
LINC01105	21.6419	7.62877	2.14255e-23
RP11-1C8.7	3.37281	0.802283	2.2569e-23
RP11-124N14.3	28.9297	108.578	5.98669e-23
AC009404.2	1.65995	0.693761	1.59938e-22
RP1-50O24.6	5.88188	9.14715	1.89436e-22
LHX5-AS1	9.20284	0.367598	1.94231e-22
RP4-614O4.11	3.32298	1.25273	1.99459e-22
LINC01102	6.49492	2.76647	3.84092e-22
GBM_LOC006520	1.72251	0.438431	3.95379e-22
RP11-229P13.23	46.6378	13.1893	4.41101e-22
C21orf88	0.431404	1.23343	8.47862e-22
RP11-347E10.1	0.102967	0.807082	1.0292e-21
AC004158.3	11.3076	5.32142	1.24428e-21
RP5-864K19.4	0.98466	1.90105	1.34767e-21
RP11-61L14.6	16.4366	6.05098	1.63878e-21
CTB-32O4.3	0.295699	0.766814	1.83554e-21
RP11-148K1.12	5.97741	10.3208	2.2963e-21
RP5-1180E21.5	12.7496	19.1767	2.41503e-21
RP1-239B22.5	2.54079	0.99836	2.50698e-21
RP11-258F1.2	3.84379	1.7415	2.64008e-21
RP11-56P23.1	1.44868	2.32157	2.85382e-21
RP11-279F6.1	3.65365	1.51086	2.85382e-21
RP11-767N6.7	2.05404	3.07971	5.0566e-21
AC074212.5	1.51346	3.13472	7.42423e-21
RP11-31F19.1	14.0342	4.92624	1.08399e-20
RP11-152N13.16	1.08566	0.517648	1.16495e-20
AC003102.3	1.23237	0.477556	1.21367e-20
BAALCOS	13.0879	5.24561	1.22581e-20
PCED1B-AS1	5.45817	14.2103	1.33689e-20
PTOV1-AS1	2.82777	4.58279	2.35393e-20
CTD-2085J24.4	1.98172	3.11653	3.03499e-20
RP1-43E13.2	0.907402	1.78122	3.03499e-20
RP3-518E13.2	38.7597	15.7091	3.21045e-20
RP11-8P11.3	2.7581	1.00886	4.75898e-20
RP11-454E5.4	5.57987	3.1676	4.96949e-20
RP11-264M12.2	7.10477	3.61942	5.35406e-20
RP11-804H8.6	0.606747	1.29383	6.79283e-20
RP11-220C2.1	4.16819	1.5154	7.42038e-20
RP1-184J9.2	0.382144	0.592217	9.88033e-20
RP4-789D17.3	3.48031	5.56487	1.11311e-19
RP11-713P17.3	8.8464	3.86895	1.62321e-19
RP11-15A1.7	1.81005	2.61835	2.69676e-19
Cabili_2815	4.77666	9.84882	2.69676e-19
LINC01351	14.1233	6.95837	2.82094e-19
RP11-342M1.3	1.23697	2.10048	3.27495e-19
RGMB-AS1	3.57546	1.85544	3.96981e-19
RP4-714D9.2	0.604436	0.918907	4.33772e-19
CTB-187M2.2	6.23874	3.3493	4.54012e-19
AC002398.11	2.58288	4.15714	5.59814e-19
KDM4A-AS1	6.05817	9.30495	5.7608e-19
SZT2-AS1	2.23843	3.45115	7.10168e-19
RP11-16N11.2	2.3467	1.29932	1.26381e-18
LINC00263	9.50429	4.65278	4.44028e-18
RP11-74E22.8	10.2585	4.6272	4.58759e-18
RP11-107F6.3	0.525105	0.862544	5.53687e-18
RP11-467L24.1	0.105959	0.954413	5.79426e-18
RP5-1024G6.2	6.70294	10.0625	7.19916e-18
RP11-307B6.3	8.57468	3.4632	9.20553e-18
LINC01356	0.339948	0.715873	1.09614e-17
AC140912.1	2.42918	0.856909	1.80997e-17
AC062021.1	14.9082	3.28058	2.00682e-17
Cabili_360	2.51451	0.397519	2.42765e-17
Cabili_1741	3.89367	2.12056	2.42765e-17
FOXD1-AS1	1.98981	9.36791	2.42765e-17
HAR1B	0.930427	0.34777	2.61563e-17
RP11-350N15.6	2.41637	1.47069	3.89662e-17
PAXBP1-AS1	2.82593	1.84506	4.01273e-17
FAM222A-AS1	2.75627	1.42312	4.08236e-17
RP5-1119A7.17	6.16629	1.86345	4.39829e-17
RP13-890H12.2	6.53051	3.98609	6.61806e-17
RP11-579D7.4	2.14313	1.14502	6.92851e-17
RP1-266L20.2	3.15542	1.78558	7.99599e-17
LINC01128	4.45868	7.25016	1.17108e-16
LINC00662	5.88043	10.1828	1.24086e-16
MIR124-2HG	4.05886	1.46976	1.4309e-16
RP11-143K11.5	2.31913	0.690874	1.49804e-16
MAFG-AS1	4.86843	2.82057	1.60671e-16
RP11-549B18.1	3.21267	1.6887	1.88233e-16
ZNF529-AS1	2.02158	3.2317	2.32236e-16
C14orf23	3.3654	1.04868	3.20187e-16
MLLT4-AS1	1.22056	0.530786	4.28815e-16
GBM_LOC025187	8.04627	1.45678	4.54221e-16
RP11-98D18.1	4.92561	1.80426	4.97737e-16
RP1-20B21.4	28.6435	45.8655	4.97737e-16
LRP4-AS1	1.44473	0.848199	5.27296e-16
FAM66C	5.78379	3.43549	5.52045e-16
EPB41L4A-AS1	97.5056	53.9498	7.26522e-16
AC144449.1	1.11075	0.690642	8.26058e-16
RP11-109P14.10	6.09347	9.28064	9.24457e-16
GBM_LOC016701	1.00414	0.442888	1.13641e-15
LGG_LOC021000	2.79351	1.38853	1.51541e-15
LINC01415	1.8661	0.752593	1.5861e-15
DDX11-AS1	1.58209	0.802998	1.82265e-15
CTD-3193O13.11	37.9179	19.7434	2.17687e-15
SNAP25-AS1	3.04283	1.17904	2.27832e-15
RP11-288I21.1	2.93427	4.47858	2.57654e-15
AP001092.4	2.77823	1.40816	2.67381e-15
FZD10-AS1	1.17789	0.45336	2.67381e-15
GRPEL2-AS1	1.95464	1.24797	2.84234e-15
LINC00339	6.14392	9.55619	3.36407e-15
RP11-527D7.1	4.10484	1.08245	3.36407e-15
CTD-3220F14.3	1.43351	2.37121	3.86207e-15
RP11-454H19.2	2.05992	1.16361	4.73158e-15
RP4-671G15.2	0.569827	1.05618	5.08681e-15
CTB-179K24.3	2.1993	3.22265	6.15675e-15
DNAJC3-AS1	4.12538	2.52277	6.17829e-15
HCG22	0.201053	1.09448	7.76466e-15
RP11-68I18.10	1.02994	0.593426	8.34492e-15
CTB-147N14.6	1.03184	2.32698	8.5036e-15
CTC-255N20.1	1.42046	0.552493	8.76509e-15
Cabili_2240	10.3441	6.26234	9.42033e-15
LINC00237	13.8213	7.12741	1.01631e-14
FLJ35934	0.943371	0.423403	1.08417e-14
AC005220.3	2.45922	1.28636	1.08417e-14
RP4-773N10.4	1.98616	2.94164	1.13477e-14
AC104655.3	3.28607	1.52211	1.24758e-14
Cabili_1401	1.96124	0.886026	1.34077e-14
RP11-505P4.6	1.34243	0.568944	1.38231e-14
RP11-390F4.6	3.29711	1.92843	1.8271e-14
RP11-307C19.2	2.48158	0.922347	1.84162e-14
RP11-64K12.4	7.51152	4.25949	1.94918e-14
RP11-463C8.7	1.13474	0.445047	2.14183e-14
RP11-93H12.4	1.58331	0.992785	2.33574e-14
RP4-789D17.5	0.990081	1.64488	2.34583e-14
GRM5-AS1	5.92927	1.7046	2.39158e-14
RP11-834C11.4	1.56132	5.51774	2.46584e-14
AC006129.2	0.425889	0.953089	3.1123e-14
TOB1-AS1	3.12702	2.07606	3.17323e-14
RP5-890E16.4	78.7969	112.871	3.46251e-14
RP4-622L5.2	3.71713	5.91592	4.34642e-14
RP3-369A17.4	0.308032	1.07116	4.53129e-14
LGG_LOC019760	0.932224	0.524003	4.6203e-14
RP11-6O2.4	6.73583	16.0241	5.22524e-14
RP11-1263C18.1	4.43636	1.71691	5.6732e-14
AC007193.8	16.6331	24.0497	5.78481e-14
RP11-799D4.4	0.970883	0.660699	6.28032e-14
LINC00599	9.44509	3.36865	6.40411e-14
RP11-483F11.7	1.92549	1.02147	6.77541e-14
CRNDE	0.656416	2.47518	6.86688e-14
RP1-317E23.3	12.237	18.2384	7.8003e-14
GBM_LOC025565	0.963408	0.56505	7.8003e-14
AC000068.10	1.76455	0.985827	8.91273e-14
CTD-2366F13.1	3.95445	2.59062	9.32544e-14
CH507-39O4.1	1.18423	0.577275	1.01717e-13
LINC01006	3.63509	7.28298	1.01717e-13
RP11-290L1.3	122.024	58.7794	1.14156e-13
RP11-341G23.4	0.289908	0.851364	1.14156e-13
CYP17A1-AS1	6.10322	3.1071	1.14156e-13
RP11-2E11.5	1.92123	0.936323	1.14156e-13
AD001527.7	1.28659	1.94117	1.15168e-13
SPACA6P	3.69346	6.08096	1.4351e-13
Cabili_1019	3.7492	5.57454	1.54007e-13
AC009892.10	0.328607	0.689823	1.54813e-13
LINC00652	1.94508	0.971976	1.57023e-13
AC009303.2	1.65377	1.06679	1.57023e-13
ST3GAL5-AS1	1.14136	0.606927	1.60167e-13
RP11-344B5.2	0.992905	2.22759	1.63377e-13
RP4-718D20.3	2.46763	1.12864	1.64256e-13
RP11-418J17.1	3.44332	4.88036	2.18184e-13
RP11-551L14.4	4.54652	2.46519	2.51567e-13
CTD-2291D10.4	1.64433	0.679624	2.56594e-13
AC015936.3	8.6724	17.9471	2.75244e-13
CTD-2545M3.8	5.39311	2.16095	3.01663e-13
HAR1A	1.96588	0.819658	3.74081e-13
RP4-728D4.2	0.362282	0.599113	4.28578e-13
CTC-471F3.6	0.306468	0.784508	5.13171e-13
RP11-143A12.3	1.00805	0.525953	5.15992e-13
RP11-706O15.1	7.40921	3.66516	5.73152e-13
LINC00461	71.5169	40.2698	6.3654e-13
RP3-333H23.9	4.88886	2.52833	6.49208e-13
RP4-758J24.5	3.55027	5.10414	7.6169e-13
RP11-552D4.1	3.59459	10.7477	8.04787e-13
AC009005.2	0.497747	1.15838	8.32479e-13
RP11-480C22.1	2.0656	5.44589	8.75189e-13
Cabili_2294	0.661617	1.07382	8.75189e-13
AC053503.11	6.67296	2.82875	8.83249e-13
RP11-626G11.3	4.54535	7.13033	8.88265e-13
CHL1-AS2	3.29027	1.35722	9.06011e-13
RP11-556E13.1	0.395668	1.17535	9.47191e-13
RP11-1049A21.2	0.364159	0.907416	1.01491e-12
RP11-1081L13.4	3.22268	2.23332	1.04618e-12
RP11-797D24.4	7.5203	4.94076	1.12736e-12
GBM_LOC012292	0.250055	1.37023	1.12736e-12
RP11-318M2.3	371.903	245.38	1.25088e-12
AC002456.2	1.46611	2.71928	1.2699e-12
RP11-90P13.1	0.380925	0.752228	1.2699e-12
RP11-87C12.5	4.65141	3.07693	1.37473e-12
AP001469.9	2.62544	1.57851	1.40225e-12
RP11-750H9.5	1.37152	2.81611	1.50203e-12
ISX-AS1	1.88249	0.333135	1.62574e-12
GBM_LOC014495	6.07401	2.74724	1.71708e-12
LINC00938	4.44228	2.98309	1.93068e-12
SLC25A21-AS1	4.84292	3.00055	1.98989e-12
RP11-598F7.6	2.45995	0.831814	2.40572e-12
TPTEP1	1.69241	11.142	3.22366e-12
CTD-2636A23.2	51.2286	27.7414	3.67927e-12
RP11-881M11.4	3.68599	5.39729	3.71364e-12
CTD-2540B15.11	8.87026	18.4088	3.73554e-12
CTD-2152M20.2	3.3506	1.56455	3.90237e-12
MIR223	0.500127	1.05492	4.05877e-12
AP000439.1	0.339733	0.777741	4.28379e-12
RP11-47I22.1	10.624	1.80422	4.30934e-12
RP11-529K1.2	1.77913	1.22144	4.4823e-12
RP11-48B3.4	0.720498	1.21101	4.4823e-12
RP11-707G14.7	0.944282	0.642142	4.84527e-12
AP000438.2	1.44812	0.575324	5.25505e-12
PINK1-AS	22.8227	32.9137	5.60251e-12
RP11-97N19.2	3.47446	1.80588	5.71367e-12
LINC01355	0.584351	0.95195	6.1118e-12
PDCD4-AS1	3.71512	2.44729	6.14873e-12
Cabili_1192	1.76093	1.12016	6.6442e-12
GBM_LOC009981	0.874461	0.455452	7.7092e-12
RP11-793H13.11	3.27678	2.25232	8.13279e-12
AC011330.13	3.61056	2.0675	1.02821e-11
NDUFA6-AS1	7.65366	5.34712	1.03445e-11
RP11-946P6.4	1.01579	0.460839	1.05062e-11
RP11-756G20.1	0.824843	0.433291	1.05062e-11
RP1-92O14.6	0.629936	0.907529	1.14992e-11
GBM_LOC039777	0.382322	0.818763	1.20056e-11
RP11-155G14.6	0.406679	0.822102	1.26611e-11
RP11-867G2.8	0.546595	0.98373	1.2731e-11
RP11-597M12.1	7.70614	4.54723	1.2731e-11
RP11-227B21.2	7.98381	3.75819	1.30625e-11
CTD-2201G16.1	4.03062	1.19752	1.30625e-11
RP3-466P17.1	1.93823	1.10614	1.36374e-11
AC021188.4	3.6729	2.11686	1.37217e-11
LA16c-380A1.1	2.23349	1.22035	1.56204e-11
LINC00665	8.48007	12.0215	1.56204e-11
CTD-2521M24.9	0.671719	1.27066	1.62437e-11
AC002398.12	10.0963	25.7285	1.62437e-11
CTD-2540B15.7	2.89699	6.30459	1.67317e-11
LINC00324	0.458256	0.685434	1.72919e-11
RP4-794H19.1	0.579093	1.08492	1.76336e-11
RP11-215G15.5	1.7905	0.695484	1.80948e-11
RP11-266K4.14	8.39131	4.77801	1.88885e-11
TMCC1-AS1	4.44212	2.86058	2.01063e-11
RP11-124D2.3	72.1829	49.9549	2.01063e-11
MIAT	8.62232	3.80382	2.07097e-11
CTD-2341M24.1	0.46659	1.22739	2.17528e-11
RP11-388P9.2	1.56775	0.786223	2.19632e-11
RP11-776H12.1	0.297235	0.585875	2.23978e-11
CH507-39O4.2	1.74114	0.886614	2.55674e-11
RP11-848P1.3	1.21854	2.11943	2.79487e-11
RP11-160O5.1	1.02076	2.12338	3.33935e-11
ZNF213-AS1	14.6683	9.62972	3.43881e-11
FOXD3-AS1	0.179648	1.30032	3.49388e-11
RP11-867G23.10	0.992335	0.44695	4.03674e-11
RP1-63G5.8	16.9988	7.54978	4.29533e-11
GTSE1-AS1	1.89259	1.13349	4.58402e-11
FOXG1-AS1	1.97394	1.06093	4.72001e-11
CTD-2574D22.2	0.950559	0.552254	5.03803e-11
AC079305.11	2.0917	0.996243	5.06996e-11
FAM201A	2.33509	0.868336	5.10214e-11
SNAI3-AS1	4.48322	2.9563	5.15139e-11
RP11-446N19.1	1.72524	0.965558	5.1842e-11
RP11-597D13.8	0.798507	1.60207	5.53304e-11
Cabili_1332	3.42908	5.5378	5.58652e-11
NS3BP	4.31888	2.02134	5.80854e-11
RP11-140A10.3	1.92494	1.09504	5.86474e-11
CTD-2510F5.4	1.10278	2.10686	5.90228e-11
RP11-442N24__B.1	0.639417	0.96414	5.93943e-11
GBM_LOC002313	0.687792	2.22902	5.93943e-11
RP11-134G8.10	3.57551	2.27027	6.46259e-11
TMEM246-AS1	1.98129	1.28167	6.80694e-11
CTD-2176I21.2	2.28007	0.99344	7.42976e-11
AC091177.1	0.53878	0.976758	7.72389e-11
CTC-435M10.12	0.806442	1.39175	7.79881e-11
RP11-290L1.2	0.89646	0.450808	8.10737e-11
RP11-708J19.1	1.73903	1.14333	8.53767e-11
CTD-2002J20.1	0.392998	0.803334	8.9901e-11
RP11-823E8.3	4.64177	2.09529	9.16578e-11
RP11-98I9.4	2.4963	1.43579	1.0294e-10
RP11-285F16.1	5.34426	2.54378	1.15952e-10
SLC6A1-AS1	1.70349	0.940992	1.19737e-10
TMEM51-AS1	13.8366	9.19632	1.22066e-10
MIR7-3HG	3.94869	1.00639	1.2444e-10
SCARNA9	3.12608	1.62929	1.44666e-10
RP11-98D18.9	3.46534	2.33759	1.62825e-10
RP5-1054A22.4	1.88637	1.10021	1.67572e-10
RP5-965G21.6	0.968054	0.60932	1.70814e-10
U91328.21	0.538501	1.05926	1.758e-10
GS1-72M22.1	1.97789	0.966987	1.758e-10
RP11-21A7A.3	14.0867	9.34025	2.08103e-10
RP1-111D6.3	0.620288	1.64237	2.26728e-10
RP11-624G17.3	13.9363	7.25193	2.40808e-10
XX-FW83563B9.5	1.46528	0.890409	2.42356e-10
LINC01287	3.10153	1.98727	2.43937e-10
RP11-355B11.2	10.6372	7.31492	2.43937e-10
Cabili_2248	0.474798	0.866894	2.53427e-10
RP5-997D16.2	0.66133	0.970291	2.53427e-10
SNHG8	128.713	84.4558	2.666e-10
RP11-181C3.1	1.94172	1.17696	2.77802e-10
RP11-446F17.3	1.51956	0.864492	3.02522e-10
CTD-2194A8.2	0.763422	1.56149	3.32515e-10
AC113189.5	21.8091	14.6611	3.64322e-10
RP4-719C8.1	1.75911	0.914979	3.64322e-10
CTD-2267D19.3	0.956846	0.496253	3.72583e-10
LINC01135	0.394746	0.644544	3.86999e-10
RP4-657D16.3	1.43083	2.42161	4.0197e-10
AC017116.11	5.50295	8.45964	4.09671e-10
RP11-702H23.6	0.67627	1.20596	4.12328e-10
WNT5A-AS1	0.243491	0.632123	4.19011e-10
RP11-256I23.2	12.38	7.48295	4.19011e-10
MCM3AP-AS1	2.44691	1.47166	4.29822e-10
RP11-309L24.2	0.441616	1.02172	4.4646e-10
RP11-680F20.12	3.89634	2.1872	4.4646e-10
TNK2-AS1	1.0033	0.584784	4.55018e-10
RP11-18H7.1	1.18282	0.719303	4.66768e-10
CPB2-AS1	3.00434	1.81696	4.66768e-10
RNU6ATAC35P	1.17642	0.626332	4.75716e-10
RP11-245J24.1	1.91248	0.57128	4.95522e-10
RP11-96H19.1	4.87632	3.02251	5.19512e-10
LA16c-380A1.2	0.822973	0.483666	5.19512e-10
LGG_LOC033929	1.13611	0.710106	6.34081e-10
CTC-241F20.3	0.670662	1.00574	6.38419e-10
RP11-315E17.1	1.17817	0.570399	6.40817e-10
RP11-441O15.3	0.882657	0.542045	6.57332e-10
LL09NC01-139C3.1	1.38806	0.745347	7.84413e-10
LLNLR-470E3.1	0.698739	1.38636	7.99336e-10
GBM_LOC038759	0.785937	0.447839	8.80325e-10
WDR86-AS1	1.05984	0.557899	8.88814e-10
RP11-373N22.3	0.89185	0.582813	9.14086e-10
RP4-575N6.4	1.03157	1.64209	9.72339e-10
CDIPT-AS1	0.710613	0.430221	1.00957e-09
RP11-278A23.4	1.25117	0.829928	1.00957e-09
LA16c-360H6.1	0.939741	0.599741	1.0705e-09
CTD-3035K23.7	0.32544	0.712098	1.21391e-09
Cabili_986	0.467323	0.715373	1.26354e-09
RP11-1277A3.1	0.944506	1.35104	1.27179e-09
GS1-114I9.1	2.25936	3.37916	1.34871e-09
RP11-118K6.3	2.7909	1.78485	1.34871e-09
RP11-316M21.7	0.983144	0.636394	1.41291e-09
BRWD1-AS2	0.872157	0.60729	1.46669e-09
CTC-471J1.8	0.412788	0.755767	1.46669e-09
RNF157-AS1	7.74247	4.99973	1.50411e-09
XXbac-BPG283O16.9	6.91297	4.64879	1.52852e-09
RP11-489O18.1	0.684624	1.23533	1.52852e-09
AC114730.7	4.95413	2.42746	1.57157e-09
RP11-46H11.3	0.732752	0.505861	1.57232e-09
CTB-31N19.3	0.381013	0.589406	1.59711e-09
LINC01141	0.508839	1.11262	1.66209e-09
CTD-2616J11.2	0.885192	1.8334	1.75777e-09
RP11-864G5.3	3.72241	6.88459	1.75777e-09
RP11-365O16.3	0.548425	0.92747	1.90338e-09
VLDLR-AS1	0.989748	0.550208	1.99856e-09
AC114803.3	3.33296	1.26592	2.03102e-09
GBM_LOC021874	1.74359	0.920821	2.03102e-09
XXbac-BPG299F13.17	1.75079	1.10616	2.29214e-09
LINC01150	0.354983	0.801436	2.73804e-09
PYCARDOS	0.684478	1.38809	2.80907e-09
RP5-858L17.1	5.14217	3.34313	2.80907e-09
RP13-726E6.2	1.68488	0.975608	2.82753e-09
Cabili_1927	1.58647	0.974865	2.90631e-09
FBXL19-AS1	0.77447	0.464853	3.25729e-09
NKX2-2-AS1	16.8473	10.7149	3.27865e-09
RP4-791M13.3	1.03381	1.75013	3.84531e-09
RP11-551L14.6	1.94857	0.870176	3.9051e-09
XXbac-B444P24.13	3.2159	2.05049	4.2608e-09
RP11-267M23.1	0.444597	0.759078	4.29125e-09
RP11-181G12.2	1.47522	2.09809	4.46229e-09
RP3-399L15.3	3.28233	2.18739	4.85618e-09
RP11-17E13.2	0.465837	0.849472	4.88796e-09
RP11-305K5.1	5.32193	8.02341	5.02264e-09
MIR219A2	11.8632	5.94845	5.16422e-09
MIR4453	3.49813	2.24878	5.89321e-09
RP13-20L14.1	1.29345	0.614437	5.89321e-09
CTA-373H7.7	7.46697	2.85605	5.98818e-09
FLJ42627	4.33641	3.03827	6.0274e-09
RP11-337C18.8	3.01443	1.9121	6.07095e-09
Cabili_2084	51.1884	27.5931	6.07095e-09
RP1-111D6.2	0.51153	1.45463	6.11078e-09
AC144652.1	3.68955	2.59029	6.29696e-09
RP1-159A19.4	0.512512	0.988307	6.60375e-09
RP11-56B16.4	3.71062	5.4547	6.7103e-09
LINC00853	1.2942	0.708859	6.77416e-09
RP11-24M17.4	1.87682	1.2571	7.02107e-09
RP4-622L5.7	1.0893	1.66696	7.58575e-09
LINC01480	1.26777	2.37599	7.58575e-09
RP11-548P2.2	1.46437	0.943581	7.98821e-09
GBM_LOC037116	1.19437	0.730038	8.04636e-09
CTC-308K20.1	1.37955	0.939987	9.00666e-09
Cabili_2025	0.967569	0.625313	9.00666e-09
AC016700.5	5.16446	3.42024	9.0921e-09
RP11-809O17.1	0.378389	0.660537	9.72695e-09
MIR4674HG	1.16803	0.669165	9.96977e-09
PVRL3-AS1	1.33605	0.793717	1.06492e-08
SNHG1	85.9459	56.2981	1.06732e-08
CTD-2380F24.1	3.91108	1.75189	1.09629e-08
RP11-21L23.3	1.78925	1.04646	1.10349e-08
RP11-1055B8.3	6.56976	3.50478	1.20262e-08
AC092675.3	0.680557	1.24028	1.23259e-08
LINC00839	7.44982	3.60387	1.25243e-08
Cabili_378	1.73152	1.05805	1.28632e-08
CTD-3157E16.2	1.71024	2.88925	1.35186e-08
PTPRD-AS1	6.11082	3.25944	1.36073e-08
RP11-733O18.1	0.371029	0.567658	1.43934e-08
LINC01341	0.864	1.5087	1.43934e-08
RP11-572O6.1	0.995798	0.541842	1.44878e-08
DGCR9	3.87496	2.15904	1.46248e-08
RP11-283G6.3	0.419687	0.789388	1.48906e-08
RP4-635E18.7	0.533096	0.784702	1.51612e-08
IPO9-AS1	3.60008	2.11681	1.53925e-08
ITGB2-AS1	0.283814	0.61564	1.58072e-08
RFPL1S	3.73814	1.70574	1.64668e-08
RP11-355I22.2	1.93594	0.785369	1.70206e-08
RP13-977J11.2	0.441873	0.745105	1.73291e-08
RP11-946L16.2	0.316468	0.633254	1.73434e-08
C1orf213	4.39434	6.3917	1.77588e-08
RP11-400F19.18	1.06222	0.608457	1.79264e-08
RP1-63G5.5	1.32141	0.641357	1.82511e-08
RP11-876N24.3	0.459197	0.669732	1.84233e-08
RP11-296L22.8	32.6312	19.2587	2.10358e-08
NDP-AS1	3.0975	4.66076	2.13726e-08
LINC00320	9.97058	5.3381	2.17583e-08
LINC01301	2.78933	1.77002	2.33967e-08
Cabili_1038	2.70407	1.87936	2.51767e-08
RP11-452L6.1	3.76693	2.5766	2.56293e-08
GS1-358P8.4	1.76945	2.92836	2.60164e-08
RP11-386I14.4	0.902227	2.04019	2.65588e-08
RP5-1068E13.7	2.19443	1.50318	2.74437e-08
RP11-872J21.3	0.703845	0.486806	2.88161e-08
RP11-439A17.10	0.650368	0.925941	2.93328e-08
RP11-482M8.3	1.15084	0.51869	2.98007e-08
RP11-552M11.4	0.812564	1.23229	3.05918e-08
Cabili_1476	3.97888	2.57388	3.20273e-08
RP4-704D21.2	0.363376	0.624893	3.22361e-08
RP3-395M20.12	1.51549	0.561126	3.25376e-08
LINC01268	2.94272	1.69	3.30562e-08
GBM_LOC016392	3.75277	2.61497	3.30562e-08
Cabili_1378	1.03194	1.67599	3.43146e-08
RP11-715J22.6	1.7826	1.20266	3.68695e-08
RP11-108M9.4	2.00014	4.04021	3.77716e-08
GBM_LOC024482	1.35272	0.924014	4.06905e-08
CTD-2616J11.3	0.370543	0.679782	4.2586e-08
SCOC-AS1	1.96697	1.2356	4.29015e-08
CTB-193M12.5	1.51606	2.23449	4.29015e-08
RP11-21A7A.2	9.69969	5.71181	4.60776e-08
LINC00863	2.32827	1.59268	4.68955e-08
CTD-2235C13.3	0.993837	0.613012	4.72432e-08
AC007563.5	1.20768	2.55246	4.89344e-08
RP1-257A7.5	26.4371	17.2633	5.12031e-08
RP11-38P22.2	6.50979	2.77557	5.30326e-08
RP11-445N20.2	2.60923	1.72625	5.63633e-08
RP11-104O19.4	1.4086	0.969545	5.63633e-08
STXBP5-AS1	1.11511	0.687144	5.8373e-08
CTC-490E21.11	0.8307	1.20359	5.98981e-08
GBM_LOC030475	1.04541	1.61238	6.14621e-08
CTD-2653D5.1	0.92263	0.517336	6.28968e-08
RP11-923I11.3	4.69764	2.68166	6.28968e-08
Cabili_2293	0.250369	0.598631	6.28968e-08
RP11-231C18.1	26.7468	13.6832	6.28968e-08
RP4-555D20.2	2.87682	1.39948	6.33046e-08
CTB-129O4.1	2.77743	1.64231	6.49557e-08
RP5-1074L1.4	0.764457	1.13566	6.62828e-08
AP005530.2	0.318313	0.637536	7.11354e-08
RP1-310O13.7	0.745141	0.474648	7.29851e-08
DKFZP434K028	2.62946	1.8376	7.55728e-08
RP11-728F11.4	2.45499	1.23175	7.97649e-08
AC104653.1	0.508412	0.892524	8.59616e-08
RP3-466P17.2	3.42809	1.95057	8.75658e-08
LGG_LOC027853	2.13831	1.00094	8.75658e-08
TFAP2A-AS1	2.30813	1.31188	9.62803e-08
ZBTB20-AS4	1.03389	0.686126	9.7962e-08
AC004019.13	1.61634	0.856763	1.0242e-07
CTD-2366F13.2	0.313858	0.593015	1.05059e-07
RP11-517A5.5	1.3714	0.864675	1.0689e-07
RP11-42O15.3	0.446419	0.705774	1.09749e-07
RP4-813D12.3	1.68931	1.17979	1.09749e-07
RP11-96K19.5	1.13009	1.62664	1.11468e-07
CTD-2620I22.7	1.98142	2.88837	1.16523e-07
RP11-797H7.5	0.519154	0.799063	1.23125e-07
AP000688.29	1.01577	0.449621	1.28126e-07
GBM_LOC008405	3.02242	1.59153	1.29077e-07
NEAT1	34.2152	51.8453	1.32741e-07
RP5-984P4.6	2.99181	1.59615	1.52022e-07
RP1-232L24.3	1.59519	1.00092	1.53405e-07
LINC00643	9.00922	3.55937	1.5705e-07
RP5-1031D4.3	0.771436	1.34004	1.58211e-07
DUXAP8	8.06354	4.83033	1.58211e-07
GBM_LOC025161	2.2019	1.2084	1.58956e-07
RP11-179B2.2	0.698374	0.48704	1.58956e-07
MRPL23-AS1	0.971914	0.528707	1.64487e-07
RP11-498P14.5	0.658329	0.454718	1.8579e-07
CTB-58E17.9	0.851007	0.49034	1.88982e-07
AC000068.5	0.940665	0.620409	1.92228e-07
RP11-420N3.3	4.37042	2.71338	2.03918e-07
RP1-257A7.4	2.24275	1.51977	2.07074e-07
RP11-594N15.3	1.13943	0.701353	2.13881e-07
U82695.10	1.78264	0.966109	2.15243e-07
LINC01411	2.0838	0.941161	2.21268e-07
RP4-549L20.3	1.16332	1.66435	2.31108e-07
CTC-444N24.8	1.07449	1.66473	2.36935e-07
RP4-740C4.7	0.720471	1.10325	2.47705e-07
Cabili_247	0.991318	0.693045	2.5555e-07
RP1-315G1.3	2.8839	1.86616	2.61975e-07
HAS2-AS1	1.72457	2.83248	2.7385e-07
RP11-131L23.2	0.348981	0.569493	2.7385e-07
WEE2-AS1	2.28975	3.32039	2.7851e-07
U73166.2	1.61221	0.965928	2.89583e-07
RP11-307C18.1	0.47671	0.781779	2.9528e-07
SPG20OS	0.908553	0.619974	2.99029e-07
RP4-555D20.1	1.36939	0.638604	3.21701e-07
AC079630.4	0.895809	0.582874	3.68863e-07
AC009227.2	7.40815	5.02513	3.81811e-07
CTD-2035E11.5	0.85922	0.513213	4.08409e-07
RP13-941N14.1	1.48152	1.033	4.17887e-07
RP11-679B19.1	0.403784	0.673628	4.17887e-07
RP11-334E6.12	166.132	112.148	4.21608e-07
MYCNOS	2.12135	1.35698	4.36578e-07
CTD-2369P2.8	0.646657	1.2045	4.39316e-07
DGCR5	7.76752	4.87688	4.71011e-07
Cabili_2859	4.20426	2.84585	4.86416e-07
RP11-318C24.2	0.344867	0.558372	5.3562e-07
RP11-244H3.1	0.825342	1.19285	5.3562e-07
Cabili_2748	0.439388	0.672229	5.58812e-07
Cabili_340	4.9883	3.03898	6.31487e-07
CTD-2527I21.4	1.53395	0.564986	6.47631e-07
CTC-338M12.5	1.32065	0.928924	6.70325e-07
RP11-340F14.6	3.8229	2.52053	6.73469e-07
CTD-2012M11.3	0.501897	1.76732	6.73469e-07
AC114730.3	11.7862	4.58022	6.7837e-07
CTD-2228K2.7	22.4405	14.1052	6.94947e-07
RP5-1033H22.2	0.515526	0.813512	7.60235e-07
EXTL3-AS1	0.857638	0.550808	8.05883e-07
AC007319.1	0.328902	0.84019	8.17969e-07
AC007405.8	0.870515	0.48076	8.2303e-07
RP11-169D4.2	1.16776	0.629239	8.36607e-07
RP11-513M16.8	6.86989	4.73761	8.42686e-07
RP11-155O18.6	0.679553	0.986329	8.61878e-07
CTA-223H9.9	0.988504	0.569466	8.61878e-07
CXorf28	2.54961	0.848819	8.8279e-07
RP3-325F22.5	0.373325	0.612564	9.14414e-07
RP4-717I23.3	7.08424	11.4747	9.65144e-07
RP11-71E19.2	0.506344	0.743518	9.8526e-07
RP11-192H23.5	793.376	521.053	9.91343e-07
A1BG-AS1	0.856236	1.60845	1.03344e-06
AC009948.5	7.30055	4.95939	1.04887e-06
RP11-123O10.4	2.19623	0.887317	1.07689e-06
AP001055.6	0.695841	1.13677	1.15241e-06
CTD-3116E22.8	0.655346	1.23263	1.17124e-06
BCYRN1	13.5629	7.18589	1.21723e-06
LINC00987	1.56036	1.03944	1.24469e-06
ZNF32-AS2	1.8336	1.29032	1.25233e-06
CELSR3-AS1	1.55227	0.81645	1.26002e-06
Cabili_2207	0.416459	0.780628	1.26141e-06
RP11-649A18.12	0.850937	0.58243	1.27695e-06
RP11-386G11.10	323.821	463.486	1.29776e-06
RP1-74M1.3	0.33435	0.558296	1.32846e-06
CTD-2020K17.4	0.987851	1.50924	1.32846e-06
CTD-2619J13.16	0.393095	0.562843	1.38047e-06
LINC01057	1.0038	1.936	1.38201e-06
RP11-23E10.3	0.829347	0.491748	1.40956e-06
VPS9D1-AS1	1.53087	1.02837	1.42851e-06
AC005356.1	1.51977	0.941342	1.42851e-06
ATP1A1-AS1	3.8524	5.58495	1.42851e-06
KCNK15-AS1	1.51152	1.01347	1.43011e-06
CTD-3157E16.1	1.12892	1.77761	1.45335e-06
LA16c-325D7.2	0.967625	0.633264	1.48397e-06
RP11-382B18.4	1.00204	0.62128	1.50393e-06
RP3-465N24.6	0.441769	0.648613	1.50393e-06
GBM_LOC031096	6.4992	3.6663	1.54715e-06
HOTAIRM1	0.305926	0.798092	1.54715e-06
RP11-415J8.3	1.13393	1.65415	1.60388e-06
CTA-250D10.23	0.949348	1.40671	1.60934e-06
CTD-2026G6.3	2.11814	1.16007	1.76761e-06
LL22NC03-2H8.5	0.812911	0.466614	1.79375e-06
RP4-610C12.3	0.387885	0.734437	1.82027e-06
AC009120.5	1.12978	0.729018	1.93834e-06
RAMP2-AS1	3.45055	2.35369	1.98649e-06
RP11-9G1.3	2.31333	1.56761	2.0702e-06
DYX1C1-CCPG1	0.977011	1.54334	2.13203e-06
CTD-2619J13.9	1.04529	1.66534	2.16628e-06
RP1-167F1.2	0.574928	0.946572	2.25555e-06
LINC01431	2.4205	1.69255	2.25555e-06
GBM_LOC028295	1.00665	0.447315	2.38014e-06
AF131216.5	5.68416	3.52815	2.45693e-06
MIR3911	4.34812	3.00061	2.69192e-06
CTA-293F17.1	2.66909	1.88643	2.92717e-06
CTD-2020K17.3	0.846305	1.3954	2.9449e-06
RP1-8B1.4	1.41843	0.937056	2.99522e-06
RP11-731J8.2	7.05628	4.13277	3.03543e-06
LLPH-AS1	1.38387	0.824052	3.15951e-06
RP5-1056H1.2	10.1851	6.80327	3.23687e-06
Cabili_1481	2.0872	1.26631	3.35622e-06
AC005330.2	3.78724	2.3813	3.35622e-06
CTD-2026K11.1	26.581	14.3628	3.37648e-06
RP11-134K13.4	1.10899	0.70343	3.42993e-06
RP4-798A10.7	2.92477	4.25551	3.43395e-06
CTB-25B13.9	0.839267	0.459323	3.47552e-06
RP11-473M20.7	6.47053	4.35424	3.61241e-06
RP11-205M5.3	0.367272	0.590106	3.61666e-06
CTC-458G6.2	1.56604	0.552685	3.65567e-06
RP11-54O7.17	0.98045	1.72177	3.70885e-06
RP11-342M3.5	37.06	24.2239	3.75832e-06
SEMA3B-AS1	2.78693	1.75985	3.87785e-06
RP11-1017G21.6	1.66224	1.13617	3.9012e-06
LA16c-380H5.5	2.4879	1.73613	3.93416e-06
RP11-161M6.2	196.247	115.746	3.99616e-06
LINC01088	40.4212	74.2071	4.09335e-06
KCNMA1-AS1	1.41163	0.884335	4.18276e-06
LINC01122	2.09771	1.38163	4.84083e-06
LGG_LOC001868	1.10056	1.58495	5.04135e-06
CTD-2547G23.4	1.26626	0.855811	5.13844e-06
TUNAR	1.15825	0.489887	5.27491e-06
Cabili_782	0.897154	0.614074	5.71247e-06
CTB-51J22.1	1.71259	1.14308	5.9831e-06
AC005754.8	1.41786	0.710041	6.01161e-06
AC012309.5	2.86791	5.1112	6.37843e-06
RP11-973D8.4	1.02949	1.4796	6.38604e-06
RP11-59C5.3	1.01927	0.704742	6.58546e-06
RP11-677M14.7	1.30973	0.897624	7.09391e-06
RP11-615I2.2	2.96368	1.36185	7.70333e-06
LINC01094	10.1992	17.6044	8.0644e-06
RP11-23N2.4	1.22532	0.715193	8.38231e-06
LINC01023	2.5871	4.05187	8.45143e-06
HP08942	6.60723	4.34677	8.56105e-06
AP000255.6	1.08494	0.739658	8.67249e-06
RP11-256I23.1	1.70024	1.14386	9.10986e-06
AC004471.9	2.82477	1.99249	9.36953e-06
RP11-500G22.4	1.74097	1.06419	9.36953e-06
GBM_LOC032111	1.54264	0.960025	9.51278e-06
WDR11-AS1	1.42763	2.23688	9.88611e-06
MIR503HG	1.973	1.31598	1.08363e-05
LINC01532	2.40784	4.40566	1.11682e-05
LL22NC03-N64E9.1	1.82649	1.20264	1.15227e-05
SLC2A1-AS1	0.4038	0.650227	1.16705e-05
AC010761.9	1.98647	1.2708	1.20404e-05
GBM_LOC039943	1.04625	0.732777	1.20981e-05
RP11-185E8.1	0.309527	0.772659	1.20981e-05
RP11-347I19.8	2.8035	1.80034	1.21551e-05
RP3-460G2.2	0.314998	0.632978	1.22542e-05
AC000068.9	4.09902	2.83337	1.2411e-05
AC000032.2	2.39002	3.67454	1.39904e-05
AGAP2-AS1	9.79838	6.58669	1.42025e-05
MAPT-AS1	6.99858	4.73459	1.4803e-05
RP11-554A11.5	1.20817	1.98314	1.49228e-05
RP11-273G15.2	1.2493	0.800894	1.51306e-05
LINC00403	5.97199	3.78405	1.51306e-05
RP1-93H18.7	0.398133	0.600329	1.53227e-05
AC093642.3	0.919057	0.553546	1.58772e-05
GPR123-AS1	2.05339	1.32265	1.62998e-05
RP11-455F5.5	0.86004	1.31549	1.66572e-05
AC010761.10	22.76	15.6959	1.79758e-05
RP1-206D15.6	0.995792	0.6765	1.96827e-05
RP11-455B3.1	0.955779	0.506073	2.22683e-05
LA16c-OS12.2	1.75058	1.23472	2.34521e-05
MGC32805	0.695162	0.47843	2.4149e-05
RP11-133F8.2	3.13695	1.87283	2.44531e-05
CTD-2270P14.5	2.41335	1.66664	2.48133e-05
RP1-253P7.4	1.69357	1.06825	2.66883e-05
LINC00463	1.12731	0.734186	2.72654e-05
RP11-375N15.2	0.836027	0.539871	2.72654e-05
RP11-341N2.1	1.63477	1.01014	2.75785e-05
RP11-141C7.4	1.27747	0.896239	2.78914e-05
RP3-368A4.6	1.19401	0.810644	2.97894e-05
AC147651.4	0.411947	0.633011	3.09072e-05
GBM_LOC039128	0.658478	0.460133	3.19285e-05
ABHD15-AS1	0.771172	1.51833	3.32754e-05
RP11-149I23.3	1.97661	1.35766	3.39491e-05
AP001350.4	0.763843	1.15986	3.45654e-05
RP11-144G6.4	1.27002	0.814199	3.45654e-05
CEBPA-AS1	0.619336	0.925765	3.46064e-05
AL161668.5	3.35081	2.08469	3.73922e-05
DNMBP-AS1	1.7165	1.00317	3.83729e-05
GBM_LOC006541	1.22093	0.680195	3.83729e-05
RP11-1105G2.3	0.537561	0.775632	3.83729e-05
Cabili_1079	1.75368	0.481803	4.40439e-05
RP5-890E16.2	0.846458	0.589539	4.43417e-05
RP11-680G10.1	0.285695	0.60462	4.51845e-05
PPIEL	3.13704	6.05135	4.5391e-05
SATB2-AS1	1.28293	0.823574	4.62628e-05
RP4-785G19.5	0.397842	0.56287	4.75997e-05
RP4-647C14.3	4.16374	2.8029	5.0604e-05
RP11-698N11.2	1.57854	2.87188	5.13384e-05
RP11-521C20.3	1.28713	1.94654	5.13384e-05
RP11-326G21.1	9.23379	14.0343	5.15725e-05
RP11-29H23.4	0.384382	0.643993	5.47226e-05
PAQR9-AS1	0.87734	0.53622	5.50909e-05
RP11-95O2.5	3.69711	2.20791	5.81826e-05
LINC00519	0.585169	0.9165	5.81826e-05
AC004837.4	0.419612	0.643907	5.96617e-05
Cabili_1386	2.13496	1.49213	6.18962e-05
LINC01314	2.69682	3.82805	6.626e-05
RP11-1182P23.5	0.969023	0.675959	6.80803e-05
DLGAP1-AS2	0.994964	1.5313	6.99484e-05
SNHG18	0.810375	0.558804	7.30145e-05
RP11-445N20.3	1.80628	1.05463	7.38145e-05
RP11-383H13.1	2.71405	1.30263	7.38145e-05
RP11-588K22.2	0.996049	0.541921	7.85485e-05
RP11-547I7.1	0.777658	0.525239	7.85485e-05
GBM_LOC045448	1.04643	0.53573	7.89964e-05
LINC00906	0.404873	0.739888	7.89964e-05
RP11-338N10.3	2.28104	1.53367	8.03899e-05
RP11-24J19.1	3.46169	5.19031	8.03899e-05
RP4-536B24.2	0.789515	0.50632	8.49843e-05
GBM_LOC026870	0.288022	0.576476	0.000111911
Cabili_2499	0.62755	1.04451	0.000113247
SOCS2-AS1	0.566991	0.827564	0.000113247
MIR4435-1HG	2.29595	3.36729	0.000114703
GBM_LOC028290	1.05193	1.97803	0.000118407
LINC01170	1.41444	0.847306	0.000119041
TINCR	0.565986	0.881059	0.000128237
KB-1125A3.11	0.670472	0.473121	0.000129188
RP11-154D6.1	24.245	34.6043	0.00012976
RP11-394J1.2	0.454773	0.779831	0.000140522
LINC00925	37.8865	26.1533	0.000154467
CTC-270D5.1	4.33612	3.01346	0.000154966
FAM181A-AS1	0.384406	0.876092	0.000172631
RP11-436K8.1	0.696653	1.1016	0.000180828
LINC00310	0.834937	1.21829	0.000188634
RP4-683L5.1	0.931179	0.597718	0.000189625
RP3-326L13.3	7.01961	10.6102	0.000213551
RP11-132F7.2	1.28328	0.904525	0.000222295
RP11-1102P16.1	1.39877	0.917211	0.000227612
CH17-360D5.2	0.443756	0.884537	0.000238251
RP11-815J21.2	0.643472	1.104	0.000244621
CTB-1I21.1	1.63333	0.684922	0.000272166
RP11-75I2.3	3.46321	2.20093	0.0002869
RP3-486I3.5	3.17707	2.19315	0.000321012
AC004623.3	3.82682	2.6328	0.000351206
RP11-472N13.3	2.36533	3.39748	0.000353127
LINC00472	0.992635	0.692915	0.000377549
CTD-2544H17.2	1.00033	0.679079	0.000386481
ARSD-AS1	3.02154	2.11807	0.000409724
AC007271.3	0.408385	0.596208	0.000422489
RP11-297M9.2	0.381381	0.751997	0.000437143
RP5-1177M21.1	4.05755	2.76721	0.000448973
WWTR1-AS1	1.43323	2.12176	0.000451235
RP11-133K1.12	0.368157	0.556775	0.000453155
RP11-69H7.3	4.27146	2.88829	0.000481827
AF127936.5	0.787468	1.14819	0.000490437
RP11-839G9.1	0.80536	1.14487	0.000502658
RP3-467L1.4	0.556641	0.827571	0.00050868
Cabili_315	0.863232	0.607837	0.000524739
GBM_LOC011896	2.55146	1.75521	0.000527361
Cabili_2819	0.395253	0.670851	0.000564737
HLA-DQB1-AS1	1.82428	3.0232	0.000615988
CTD-3092A11.2	1.26578	1.98921	0.000630894
LL22NC03-N14H11.1	2.13704	1.43761	0.000674637
COLCA1	0.449898	0.709253	0.000717672
CTD-3064H18.4	0.97167	0.567114	0.000729663
Cabili_833	2.80591	1.86311	0.000754773
RP11-77K12.4	0.467289	0.757377	0.000790716
SERPINB9P1	0.494	0.773535	0.000932211
RP11-44M6.7	1.53388	2.28872	0.00100117
RNF219-AS1	4.04413	6.39025	0.00103116
LINC00342	5.63588	3.95061	0.00107735
CTC-251I16.1	1.50437	2.37619	0.00108849
RP11-680F20.11	1.2082	0.834359	0.00112228
RP11-64K12.10	0.805946	0.524623	0.00116497
ATE1-AS1	2.29204	1.59817	0.00118005
AC114730.8	1.6234	1.08293	0.00118568
AC011524.1	0.656579	1.00655	0.00134161
CTB-113P19.1	1.44822	0.912143	0.00141755
RP11-190A12.8	1.09051	0.65014	0.00168421
RP11-275H4.1	2.23175	1.0799	0.00179665
AC067969.1	0.429747	0.647084	0.00180819
AC005197.2	0.952425	0.671135	0.00186697
LINC00894	1.37534	0.872824	0.00203487
EPHA5-AS1	0.42597	0.938929	0.00208494
LINC00152	1.87805	2.69432	0.00216992
UG0898H09	11.6003	17.2474	0.00240859
C21orf37	2.25865	1.55164	0.00247249
CTA-14H9.5	0.862146	1.27985	0.00248212
PARD3-AS1	1.4837	1.04741	0.00261799
GFOD1-AS1	1.50393	1.00893	0.00268878
LINC00982	2.41617	3.63447	0.00277858
KBTBD11-OT1	0.889541	0.605181	0.00280672
GBM_LOC031703	0.412794	0.594307	0.00359231
AC007009.1	0.916716	0.647216	0.00365022
Cabili_1805	1.10497	0.723423	0.00365022
FOXP4-AS1	0.711666	0.457651	0.00372771
ALDH1L1-AS2	1.16568	1.79444	0.00372771
GBM_LOC005796	0.94376	0.660013	0.0039143
Cabili_1455	1.24877	0.810864	0.00394811
PVT1	4.53259	10.2706	0.00396304
LINC00689	2.08888	4.04354	0.00434444
LINC01485	2.5906	1.53394	0.00435812
RP13-298C8.3	0.5101	0.780558	0.00439555
RP11-439C15.4	4.52407	2.97728	0.00443598
ELMO1-AS1	1.21516	1.72019	0.004499
RP4-545L17.11	2.1708	1.5125	0.00452607
RP11-361F15.2	1.37623	0.931118	0.0047432
RP11-66D17.5	0.425618	0.602989	0.00512827
CTD-2292P10.2	2.51083	1.52527	0.00617568
Cabili_1242	2.65412	1.8296	0.00646066
RP11-392E22.10	0.81571	0.50257	0.00700401
RP11-403A3.2	0.782027	1.20055	0.00766116
RP11-392E22.12	1.03712	0.630917	0.00780996
RP11-15I11.3	0.447916	0.648657	0.00806468
SNORD64	0.787367	1.20227	0.00820312
RP4-665J23.1	1.39116	2.1312	0.0085313
RP11-179A16.1	0.760369	0.530347	0.00886364
GBM_LOC039900	0.653424	1.14207	0.00901859

## Sheet: EGFR
lncRNA	Mutation median FPKM	WT median FPKM	FDR
TP73-AS1	13.9676	3.20025	5.00446e-13
LINC00925	5.78071	30.8948	2.27837e-12
AC079305.11	0.0535126	1.25759	2.27837e-12
RP11-161M6.2	34.9697	135.601	3.07207e-12
SLC25A21-AS1	0.472624	3.48364	3.88283e-12
RP11-161H23.5	48.1862	9.81537	8.00184e-12
RP11-7I15.3	2.97487	0.965678	1.11805e-11
RP5-1056H1.2	0.576648	8.3176	2.67576e-11
SNHG18	5.25097	0.568299	4.54981e-11
AC002398.12	80.8169	19.193	4.54981e-11
RP11-5C23.2	1.53015	0.499976	1.49901e-10
RP11-54O7.3	0.333869	1.98611	2.17692e-10
RP11-231C18.1	1.06852	17.1684	2.17692e-10
ARSD-AS1	9.63881	2.18978	2.17692e-10
GBM_LOC025187	0.0551565	2.6132	3.4186e-10
LGG_LOC030946	0.123416	1.013	3.4186e-10
RP11-464F9.22	0.590234	1.46757	3.4186e-10
AC073283.4	1.44475	4.11874	4.20262e-10
AC062021.1	0.149629	5.75896	6.0098e-10
CYP17A1-AS1	1.18658	3.80473	7.32151e-10
RP11-159H10.3	0.167345	1.11651	7.32151e-10
AC009227.2	1.0694	6.13184	1.35679e-09
RP11-305E6.4	0.649978	1.40606	1.84956e-09
RP11-195F19.30	1.83715	0.537307	1.84956e-09
AC010226.4	3.59138	1.09475	1.84956e-09
CTD-3064H18.4	0.168161	0.689119	1.97992e-09
RP6-201G10.2	1.29589	4.24978	1.97992e-09
RP11-429B14.4	1.92991	6.04716	2.12809e-09
CTC-510F12.6	8.42204	3.92238	2.46085e-09
Cabili_1927	0.458213	1.12285	2.55634e-09
SOCS2-AS1	2.73144	0.715686	3.2958e-09
LINC00152	11.571	2.30687	4.60664e-09
RP11-108L7.4	1.16556	2.45043	4.60664e-09
CTB-193M12.5	5.01388	1.94328	4.97657e-09
LEF1-AS1	1.40305	0.563159	5.37936e-09
HOTAIRM1	6.43181	0.632024	5.81789e-09
RP11-5C23.1	5.71566	1.46284	6.07787e-09
LINC00092	4.07229	0.778852	7.83965e-09
RP11-73C9.1	0.783485	2.55146	9.19348e-09
RP11-521C22.2	0.254736	0.542715	9.19348e-09
ZNF32-AS1	23.8504	37.044	1.19784e-08
AC097724.3	1.38678	3.37242	1.19784e-08
RP13-270P17.3	1.37119	0.541637	1.34398e-08
PAXIP1OS	3.41379	1.20291	1.3602e-08
DTX2P1-UPK3BP1-PMS2P11	3.99739	2.73122	1.37725e-08
RP11-21A7A.3	5.02458	10.4547	1.49442e-08
CTB-1I21.1	0.0873691	0.880382	1.62192e-08
RP11-231C18.2	0.104224	1.04445	1.82189e-08
RP11-77K12.4	2.59624	0.653621	1.91163e-08
RP11-134G8.10	5.70834	2.52876	2.14774e-08
LL22NC03-N64E9.1	0.282336	1.45631	2.21207e-08
CTD-2325P2.4	7.58637	2.01853	2.21207e-08
RP11-309L24.2	5.18739	0.772609	2.84661e-08
RP13-270P17.1	4.26302	1.6354	2.89078e-08
LRRC75A-AS1	251.524	497.733	3.03716e-08
GBM_LOC047199	0.119184	0.837389	3.08605e-08
MIR4435-1HG	13.264	2.79271	3.18888e-08
RP11-1191J2.5	1.75679	0.533108	3.18888e-08
RP11-839D17.3	1.50156	0.486996	3.70828e-08
LINC00632	1.40959	3.92134	3.77162e-08
AC017116.11	25.5369	7.37831	5.00919e-08
AC053503.11	0.926679	4.02607	5.62913e-08
RP11-54O7.16	0.179692	1.10282	5.92034e-08
RP5-1024C24.1	1.80193	0.473469	6.33894e-08
SNHG1	32.0281	65.3154	6.33894e-08
Cabili_1904	0.3477	0.791751	6.66989e-08
RP11-132F7.2	0.185117	1.04808	7.74594e-08
RP11-574K11.32	11.0683	16.8027	8.42237e-08
FAM181A-AS1	3.76788	0.63642	9.15768e-08
CTC-548K16.5	3.50352	1.03028	1.06268e-07
RP11-315E17.1	0.268102	0.76125	1.08256e-07
RP11-279F6.1	0.656892	1.88034	1.08809e-07
RP11-398C13.6	0.678767	1.49992	1.08809e-07
RP3-466P17.1	0.557148	1.3684	1.14557e-07
AC083864.3	0.216668	1.25951	1.24586e-07
RP11-124D2.3	31.9306	56.8122	1.31181e-07
GBM_LOC005589	0.230303	0.638907	1.47329e-07
AC009501.4	7.75497	4.64982	1.55132e-07
GBM_LOC025161	0.365396	1.38591	1.63357e-07
AC093673.5	16.992	7.29319	1.77627e-07
RP11-513M16.7	1.97343	4.38831	1.87055e-07
DYNLL1-AS1	5.49181	3.18926	2.03378e-07
RP11-303E16.2	4.53024	2.07578	2.18506e-07
CTB-51J22.1	3.78143	1.21969	2.18506e-07
SBF2-AS1	1.34833	0.559987	2.22944e-07
RP11-278A23.4	0.410602	0.947494	2.34835e-07
RP4-665J23.1	7.88459	1.76805	2.36957e-07
GBM_LOC028297	0.0934435	1.19644	2.36957e-07
LINC00672	3.57071	10.4771	2.41871e-07
GBM_LOC004742	0.307171	0.564063	2.46911e-07
CTD-2341M24.1	2.76157	1.00391	2.5208e-07
RP11-464F9.20	0.455786	0.906635	2.74164e-07
RP11-342M1.3	3.19976	1.78828	2.7994e-07
RP11-403A3.2	6.04641	0.970702	2.79969e-07
RP11-124N14.3	229.54	67.4239	2.79969e-07
RP11-38P22.2	12.3103	3.12305	2.79969e-07
RP11-609D21.3	7.88959	2.60385	2.85978e-07
RP11-403A3.3	23.2099	4.93224	3.01471e-07
RP11-498P14.5	0.303224	0.51771	3.83463e-07
RP11-839G9.1	0.322772	1.10081	4.25871e-07
LGG_LOC027853	0.186115	1.37705	4.25871e-07
Cabili_1038	1.1305	2.12186	4.54139e-07
RP3-518E13.2	6.25724	20.5929	4.54139e-07
GBM_LOC021874	0.195756	1.18254	4.54139e-07
RP11-632P5.1	0.146147	0.978271	4.93709e-07
RP11-156L14.1	1.60379	0.623154	5.04473e-07
RP11-317J10.2	3.14185	1.35809	5.48357e-07
LINC01159	2.02853	0.977251	5.60352e-07
RP11-295G20.2	2.95469	1.61844	6.03527e-07
FLJ16779	8.50987	25.0941	6.03527e-07
LHX5-AS1	0.00799704	1.38238	6.11359e-07
RPARP-AS1	4.54824	7.35248	6.11359e-07
AC002456.2	5.60453	2.12734	6.24905e-07
DNMBP-AS1	0.385497	1.16365	6.47423e-07
RP11-1134I14.8	1.84439	3.49337	6.47423e-07
RP11-68I18.10	0.284461	0.69506	6.47423e-07
Cabili_1456	3.09451	5.48318	7.25552e-07
RP11-706O15.1	0.86618	4.57606	7.41771e-07
RP11-15I11.3	0.249246	0.63151	7.75409e-07
RP11-38L15.2	1.5484	2.81883	7.75409e-07
RP11-46C24.7	2.84265	4.26674	8.04173e-07
LINC01503	6.15309	2.90067	8.04173e-07
RP11-265D17.2	1.37898	0.770451	8.04173e-07
RP11-21A7A.4	0.540729	1.10597	8.15852e-07
RP11-1191J2.2	2.99798	0.748035	8.15852e-07
KIAA1614-AS1	1.8733	0.994676	8.27888e-07
EPB41L4A-AS1	34.1669	61.0001	8.27888e-07
RP11-59C5.3	0.389329	0.792124	8.72887e-07
CTD-2017C7.1	0.880818	1.4451	9.20293e-07
RP11-286H14.8	10.8078	5.20457	1.02283e-06
RP11-395B7.7	15.0719	6.92357	1.14514e-06
RP11-360L9.7	2.14895	0.961538	1.20699e-06
RP1-266L20.2	1.03872	2.14491	1.22547e-06
RP11-334A14.5	3.12845	5.46684	1.22547e-06
RP11-359B12.2	1.90915	3.64461	1.24447e-06
FOXD3-AS1	5.43455	0.936455	1.24447e-06
RP11-545E17.3	1.45359	0.760277	1.31178e-06
BAALC-AS1	14.721	6.07925	1.34195e-06
RP11-797D24.4	3.16822	5.77703	1.45728e-06
ACVR2B-AS1	0.370391	0.640504	1.49079e-06
GAS5	107.746	195.191	1.57118e-06
RP11-443B20.1	1.16031	0.568208	1.60734e-06
AC084125.4	0.965642	0.598023	1.63312e-06
DKFZp434J0226	0.12811	0.790158	1.63312e-06
CTD-2270P14.5	0.803772	1.88925	1.65958e-06
C10orf85	1.192	2.57565	1.65958e-06
RP11-4L24.3	0.846033	1.6891	1.69805e-06
CRNDE	11.9869	1.53581	1.73745e-06
MORC2-AS1	2.60112	3.78651	1.75455e-06
RP11-357K6.1	0.452214	2.39058	1.75455e-06
RP11-134L10.1	5.24817	3.42683	1.75455e-06
RP11-667K14.3	1.37544	2.22555	2.14295e-06
RP11-44N11.2	0.669896	1.14377	2.31032e-06
GBM_LOC028295	0.100066	0.617869	2.31032e-06
CTD-2521M24.9	3.35525	1.06999	2.36391e-06
CTD-2595P9.4	0.441947	0.980866	2.38854e-06
RP11-340F14.6	1.16452	2.85057	2.38854e-06
RP11-1102P16.1	0.26167	1.08855	2.38854e-06
Cabili_1242	0.973579	2.03409	2.59134e-06
EPHA5-AS1	5.32664	0.669369	2.63536e-06
FAM222A-AS1	0.936448	1.73934	2.63536e-06
RP11-152N13.5	1.07502	1.94161	2.85857e-06
RP1-63G5.5	0.23242	0.789101	2.9251e-06
LINC00928	0.475382	1.48614	3.08141e-06
AC003102.3	0.292775	0.595422	3.1158e-06
LINC00863	1.04795	1.77104	3.1158e-06
RP11-338N10.1	0.31455	0.578186	3.1158e-06
RP11-441O15.3	0.367238	0.630626	3.45738e-06
RP11-680F20.11	0.345904	0.915134	3.45738e-06
RP11-401P9.5	0.439823	1.14758	3.62055e-06
RP11-93H12.4	0.577354	1.13525	3.62055e-06
RP1-63G5.8	1.84293	9.83948	3.92466e-06
LGG_LOC021000	0.728923	1.6524	3.92633e-06
RP11-973D8.5	0.48314	0.896438	3.92633e-06
RP11-220C2.1	0.700195	2.12597	3.92633e-06
RP11-179B2.2	0.333252	0.548574	3.92633e-06
LINC00237	1.6033	8.49966	3.92633e-06
LGG_LOC036929	0.222588	1.14871	3.95245e-06
RP11-196G18.22	1.17609	2.21769	3.95245e-06
CTD-2380F24.1	0.729449	2.24763	3.95245e-06
AC104655.3	0.787497	1.92672	3.95245e-06
AC000068.10	0.578419	1.19885	4.14063e-06
RP11-87C12.5	1.75132	3.60224	4.14063e-06
CTC-458G6.2	0.100001	0.763472	4.21541e-06
SNHG6	113.143	172.673	4.21541e-06
RP11-46H11.3	0.153154	0.588422	4.29193e-06
CTD-2653D5.1	0.204181	0.599244	4.29193e-06
ZFAS1	107.844	171.264	4.39321e-06
MAPT-AS1	1.94431	5.28257	4.60304e-06
MRPL23-AS1	0.230192	0.646145	4.71169e-06
RP11-348N5.9	0.417187	0.780709	4.93677e-06
RP11-196G18.24	3.01466	5.50937	4.93677e-06
FLJ37035	2.79312	4.36504	5.00227e-06
RP11-767N6.7	4.13704	2.73808	5.00227e-06
CTD-3035K23.7	1.57321	0.569718	5.00227e-06
PVRL3-AS1	0.295375	0.910706	5.12062e-06
RP11-326I19.2	0.668901	1.06197	5.24178e-06
AC002398.13	3.60596	2.50214	5.36579e-06
RP11-508N22.13	0.524079	1.23062	5.46568e-06
XXbac-BPGBPG55C20.2	0.600661	1.10878	5.46568e-06
RP11-801F7.1	6.49294	4.04367	5.59512e-06
RP5-956O18.3	40.1263	25.2132	5.89184e-06
RP11-624M8.1	1.85118	5.12405	6.0312e-06
AC002429.5	0.410019	1.49896	6.17384e-06
RP11-758H9.2	3.10043	5.16484	6.46928e-06
RP11-463C8.7	0.133954	0.600584	6.46928e-06
RP1-198K11.5	1.1624	0.632282	6.62223e-06
RP11-304L19.12	0.617222	1.35062	7.1365e-06
LINC00844	40.915	109.035	7.1365e-06
AP001469.9	1.04967	1.87548	7.27084e-06
WAC-AS1	10.7778	16.1965	7.27084e-06
CTD-2325A15.5	2.10412	1.049	7.65386e-06
CTD-3138B18.5	2.12659	1.42623	7.79836e-06
ALDH1L1-AS2	6.07009	1.50609	7.79836e-06
RP11-359E3.4	0.329982	0.622907	7.9825e-06
RP11-615I2.2	0.492707	1.67183	8.17096e-06
CTD-2132N18.4	1.41064	2.58093	8.36382e-06
GBM_LOC035081	2.05364	1.42043	9.05106e-06
RP11-177H2.2	0.252945	0.614612	9.7488e-06
CTD-2132N18.2	1.14965	2.0269	9.7488e-06
TPT1-AS1	9.00441	13.2343	1.04523e-05
PLCG1-AS1	2.34433	1.4694	1.04523e-05
RP11-798M19.3	5.16311	3.62584	1.04523e-05
RP11-25K19.1	5.25554	9.1448	1.06978e-05
CTD-3157E16.1	4.02865	1.47274	1.09489e-05
RP11-849H4.4	19.1085	27.0763	1.21706e-05
GBM_LOC004789	0.983939	1.88148	1.24553e-05
RP11-148K1.12	13.5871	9.07442	1.32922e-05
RP11-54O7.17	0.660236	1.61194	1.32922e-05
Cabili_1919	1.77397	0.811959	1.32922e-05
RP11-728F11.4	0.48845	1.57561	1.39801e-05
AC006160.5	1.52263	0.846731	1.41862e-05
GBM_LOC049497	0.419805	0.732492	1.41862e-05
LINC01057	4.10679	1.55476	1.41862e-05
GBM_LOC026352	1.05161	0.545853	1.49191e-05
CTC-498J12.3	1.57045	1.04947	1.56886e-05
AC093818.1	1.01584	0.689055	1.59878e-05
RP11-506K6.4	0.341766	0.611602	1.59878e-05
ZBTB20-AS4	0.296051	0.808404	1.68107e-05
LINC00693	4.95014	9.32944	1.71318e-05
PRMT5-AS1	9.42153	14.4973	1.71318e-05
AC012507.3	1.5017	0.489669	1.75307e-05
PWAR6	7.38623	14.0952	1.77235e-05
LINC01287	1.0957	2.34345	1.77235e-05
RP3-337O18.9	8.94797	5.82303	1.77235e-05
RP11-57H14.4	2.41745	3.65175	1.77235e-05
RP11-143K11.5	0.221908	0.982691	1.81367e-05
RP11-118K6.3	0.945534	2.10731	1.84861e-05
RP11-823E8.3	6.03632	2.40193	1.84861e-05
CTD-2521M24.6	1.22509	0.800153	1.88428e-05
IGFBP7-AS1	24.7792	12.2002	1.88428e-05
AC000068.9	2.13004	3.11081	1.92072e-05
RP11-323P17.2	0.544264	1.02015	1.92072e-05
RP11-71N10.1	5.88702	2.30253	2.24804e-05
RP13-650J16.1	1.31407	2.68379	2.28253e-05
MIR124-2HG	0.510546	1.98385	2.28253e-05
LINC01114	3.17195	1.68681	2.28253e-05
RP11-973D8.4	2.44863	1.28776	2.3266e-05
Cabili_986	1.2406	0.589047	2.3266e-05
RP11-328J6.1	0.760785	1.93355	2.36269e-05
RP11-119F19.5	0.867952	1.74543	2.36269e-05
AC005786.7	16.9804	11.8454	2.36269e-05
RP11-688G15.3	11.0676	16.3793	2.51236e-05
RP11-401P9.4	6.5708	13.6312	2.51236e-05
RP4-555D20.2	0.766735	1.81571	2.51236e-05
RP11-351D16.3	0.348755	0.658008	2.51236e-05
ERVK3-1	36.2165	25.3885	2.51236e-05
NUTM2B-AS1	3.57162	5.26996	2.69132e-05
AF131216.5	1.57716	4.20116	2.69132e-05
JMJD1C-AS1	0.560763	1.4086	2.97077e-05
RP11-120J1.1	3.69176	7.54115	3.00682e-05
TMEM254-AS1	1.50024	2.56292	3.00682e-05
TPTEP1	1.59404	7.40142	3.00682e-05
CTD-3157E16.2	5.69702	2.25239	3.00682e-05
WWTR1-AS1	6.6899	1.8035	3.06545e-05
GBM_LOC005796	0.312826	0.726159	3.13633e-05
RP1-178F15.5	3.07793	1.62813	3.1533e-05
RP11-446F17.3	0.543993	1.01103	3.1533e-05
RP11-343L5.2	0.774646	0.491727	3.1533e-05
RP11-119F7.5	1.18767	2.02662	3.1533e-05
PVT1	26.4818	8.04852	3.1533e-05
RP5-1198O20.4	4.65733	7.51096	3.1533e-05
MIR4697HG	6.53084	14.4024	3.31238e-05
CTB-129P6.4	1.28214	0.72727	3.37736e-05
RP11-543C4.1	0.392137	0.74393	3.37736e-05
RP11-316M1.12	96.5601	62.4181	3.44368e-05
MZF1-AS1	1.79545	1.00552	3.44368e-05
RP11-1C8.7	0.216436	1.29615	3.51137e-05
RP11-83A24.2	1.30424	0.904994	3.51137e-05
RP5-967N21.11	2.76748	1.74697	3.67551e-05
GS1-124K5.11	1.49908	0.955292	3.67551e-05
LINC00235	0.393379	0.599575	3.74781e-05
CTD-2517O10.6	1.00802	0.557899	3.74781e-05
LINC00519	0.356544	0.898891	3.93578e-05
LINC00689	0.530158	3.65569	4.13279e-05
RP11-391M1.4	4.48611	7.65815	4.22783e-05
SLC16A1-AS1	0.896966	0.587218	4.31082e-05
RP11-690D19.3	1.21048e-05	0.935374	4.31082e-05
RP11-158M2.5	0.359448	0.92698	4.40987e-05
RP11-269C23.5	1.08087	2.1379	4.62968e-05
RP13-514E23.1	3.39807	4.86903	4.70524e-05
DGCR9	0.98016	2.57198	4.70524e-05
AC147651.4	1.29183	0.554544	4.70524e-05
RP11-133F8.2	0.969973	2.17848	4.90767e-05
Cabili_1858	1.10417	3.84439	4.90767e-05
LINC00263	3.40679	5.72726	4.90767e-05
RP11-144G6.12	1.24347	2.27717	5.02008e-05
RP5-1177M21.1	0.343214	3.2155	5.13499e-05
RP5-1021I20.1	2.18229	4.38263	5.53002e-05
AC068057.1	4.76715	1.30056	5.9354e-05
RP11-549L6.3	0.559031	1.19569	5.9354e-05
RP1-293L6.1	0.29511	1.80154	6.49356e-05
GBM_LOC026050	0.415828	0.671464	6.49356e-05
RP11-725P16.2	0.730171	1.67044	6.49356e-05
RP11-706J10.2	5.55856	1.69349	6.49356e-05
NUCB1-AS1	1.34057	0.779922	6.62036e-05
LINC01137	2.4971	1.38569	6.62036e-05
CTD-2126E3.3	1.66066	1.06926	6.6679e-05
LINC01089	10.2445	15.5168	6.6679e-05
DICER1-AS1	6.14255	10.3783	6.6679e-05
RP11-192H23.5	270.732	594.772	6.6679e-05
RP11-807H17.1	0.124258	0.807006	6.6679e-05
CTD-3113P16.10	3.09247	1.79014	6.6679e-05
RP11-435O5.5	0.331665	0.517232	6.79877e-05
SNORA72	3.85858	5.8815	6.79877e-05
CTD-3092A11.2	3.39785	1.7146	6.93229e-05
MIR22HG	6.41989	3.35185	6.93229e-05
XXbac-B461K10.4	6.93043	11.2041	7.0685e-05
AC015936.3	32.4827	13.7224	7.37089e-05
Cabili_1510	0.979258	1.69938	7.37089e-05
AC006115.3	2.29715	1.2047	7.5379e-05
FLJ42627	2.29681	3.41919	7.70857e-05
RP11-386G11.10	745.416	427.784	7.85999e-05
RP11-1000B6.3	1.30097	0.660163	7.85999e-05
Cabili_1318	0.285581	0.764251	8.01444e-05
ZNF32-AS2	0.898854	1.41875	8.01444e-05
APTR	21.1396	14.5334	8.172e-05
ZNF571-AS1	1.48937	3.29984	8.54535e-05
AP003068.9	42.088	60.1666	8.54535e-05
RP11-513M16.8	3.04514	5.21537	8.93514e-05
LBX2-AS1	1.01367	0.488098	8.93514e-05
RP11-159D12.8	4.56071	2.70014	9.13641e-05
RP11-455O6.9	0.237837	0.656334	9.31567e-05
RP11-1277A3.3	0.951422	0.505063	9.31567e-05
AC002310.12	1.20302	1.82237	9.7121e-05
GBM_LOC040061	2.86305	0.52481	9.7121e-05
RP11-74E22.8	1.5334	6.59354	9.90267e-05
XXbac-B444P24.13	1.26335	2.24024	9.90267e-05
GBM_LOC028290	0.932974	1.80475	0.000101251
RP11-432J22.2	0.546697	0.881715	0.000105844
U91328.21	1.66374	0.85746	0.000105844
CTD-2033A16.1	2.43835	1.55068	0.000110943
SNHG11	16.0217	9.64514	0.000113424
AP003774.4	1.49799	0.879844	0.000115641
RP11-420L9.5	4.42841	2.51779	0.000115641
WDR86-AS1	0.3024	0.672783	0.000117265
GBM_LOC045448	0.217188	0.736464	0.000117265
RP11-296L22.8	10.4263	22.5105	0.000117265
RP1-317E23.3	25.3459	16.6597	0.000119884
WDR11-AS1	0.970913	2.05236	0.000122231
CTD-3193O13.11	9.39764	23.3498	0.000122231
H19	4.03387	0.521207	0.000123963
RP11-21A7A.2	2.72899	6.38351	0.000123963
RP3-466P17.2	1.27363	2.43004	0.000123963
RP11-358L22.3	1.12712	1.79185	0.000123963
PCAT6	2.77759	4.15373	0.000126728
RP11-553L6.5	41.6537	62.4162	0.000129212
AC113189.5	10.4754	16.5722	0.000129212
RP11-809O17.1	0.99877	0.549864	0.00013503
AC068831.6	5.99862	4.12265	0.000137674
CTD-2002J20.1	0.320943	0.72502	0.000140369
RP4-669P10.16	1.40972	2.56826	0.000140369
AC010761.6	1.49387	0.935358	0.000143487
ZNRD1-AS1	1.45105	2.14568	0.000146295
RP11-394B2.1	83.4841	131.28	0.000146295
RP11-999E24.3	11.6032	16.8795	0.000149157
RP11-2E11.5	0.512211	1.14703	0.000149157
RP11-1008C21.2	1.42915	0.890784	0.000151306
C21orf49	1.47285	2.23499	0.000151306
CTD-2561B21.11	0.39645	0.992617	0.000151306
CTD-2659N19.2	12.2813	7.55314	0.000151306
RP11-108M9.4	7.34536	3.42847	0.000157688
RP1-193H18.2	1.51115	2.48521	0.000157688
AP000255.6	0.365139	0.830898	0.000161179
LINC00641	9.364	15.5226	0.000168805
CTB-25B13.12	5.45103	3.59021	0.000171675
PARD3-AS1	0.507837	1.17898	0.000171675
RP11-876N24.3	1.37771	0.574191	0.000171675
RP11-149I23.3	0.881641	1.53458	0.000178888
AL161668.5	1.22323	2.39419	0.000178888
RP1-65J11.1	1.82274	0.912892	0.000178888
LINC00463	0.397658	0.841341	0.000182829
RP11-18J9.3	0.213023	0.602982	0.00019143
RP11-147L13.14	0.373497	0.620901	0.000194683
SVIL-AS1	13.232	22.0169	0.000194683
RP11-467D6.1	0.726011	0.505917	0.000194683
AE000658.22	31.7583	47.0252	0.000197996
RP13-298C8.3	1.97646	0.664646	0.000197996
LINC00960	0.514742	1.55728	0.000200889
RP11-318E3.9	0.856922	1.24472	0.000204323
RP11-343J3.2	0.338258	1.31984	0.000204323
AC016747.3	5.07305	3.41548	0.000204323
CTD-2369P2.8	2.15063	1.03188	0.000208311
RP11-218C14.8	6.62629	2.4965	0.00021754
RP11-1055B8.3	1.72302	4.18021	0.0002223
RP11-267M23.1	1.11728	0.665295	0.000227159
RP11-441F2.5	1.06866	2.6187	0.00023104
AC092171.4	8.37703	5.37217	0.00023104
RP11-338K17.8	11.0555	6.38119	0.00023104
RP11-160O5.1	3.99693	1.7607	0.000241233
RP11-258F1.2	3.3422	2.33495	0.000241233
RP3-525N10.2	9.84575	17.5566	0.000245921
RP11-98D18.9	1.56692	2.61779	0.000250699
RP11-258C19.7	3.29782	5.09778	0.000250699
RP11-517P14.2	1.43053	2.25305	0.000254987
RP11-299G20.5	1.1062	1.95844	0.000254987
RP11-499P20.2	1.22346	1.97997	0.000254987
RP11-876N24.7	1.57949	0.864519	0.000264991
RP11-196G18.23	2.40345	3.44213	0.000264991
RP11-81A22.4	2.17878	3.63425	0.000264991
Cabili_1973	1.89886	2.99229	0.000270137
SATB1-AS1	1.04898	2.44096	0.000281354
GBM_LOC025944	0.303536	0.624309	0.000281354
Cabili_2084	12.406	32.4916	0.000281354
LIPE-AS1	15.6463	9.88772	0.000291725
RP11-277P12.20	0.287678	0.665284	0.000291725
AL450992.2	2.0389	0.492115	0.000291725
RP11-452L6.7	1.30499	2.20316	0.000291725
CIRBP-AS1	1.31023	0.907219	0.00029673
RP11-347I19.7	0.754982	1.18799	0.00029673
RP11-368P15.3	2.34364	3.36113	0.000303147
AC007405.8	0.173967	0.562208	0.00031638
AC073342.12	1.41722	0.98495	0.00031638
RP11-1081L13.4	1.72852	2.49532	0.000337268
AC144831.3	0.409798	0.837746	0.000337268
RP11-1277A3.1	1.87299	1.24154	0.000337268
RP11-18I14.11	0.764754	1.11681	0.000343037
RP11-375N15.2	1.15377	0.595195	0.000343037
GBM_LOC002313	3.90629	1.57205	0.000343037
RP5-1119A7.17	0.561801	2.71984	0.000365603
LINC01023	6.84963	3.55568	0.000365603
CTD-2545M3.8	1.59219	2.89493	0.000373434
RP11-395I6.3	1.51514	2.29147	0.000379809
RP11-247A12.2	0.46614	0.787011	0.000379809
Cabili_49	0.609027	1.08239	0.000379809
RP11-626G11.3	10.7063	6.32845	0.000387114
GPR123-AS1	0.548948	1.56465	0.000387114
RP11-290L1.2	0.293523	0.58155	0.000393729
RP11-152H18.3	41.3247	28.8851	0.000393729
RP11-326I11.3	1.54473	1.06428	0.000393729
RP1-74M1.3	0.88043	0.479457	0.000411577
AC005356.1	0.547645	1.09223	0.000417732
RP11-676J15.1	0.864883	2.61243	0.000417732
CTD-3128G10.6	2.007	1.15756	0.000417732
ZNF503-AS2	1.93329	1.28608	0.000417732
RP4-758J18.2	18.5238	13.0578	0.000423996
RP1-179N16.6	0.644358	0.959439	0.000423996
Cabili_2898	0.845513	1.58421	0.000423996
Cabili_523	2.67225	1.36938	0.000432137
EPB41L4A-AS2	1.07048	0.604408	0.000432137
RP11-116N8.1	2.04126	3.4754	0.000441331
RP11-38L15.3	1.77906	4.05611	0.00045071
RP11-98D18.1	0.889306	2.69385	0.000460279
Cabili_2693	0.248105	0.818467	0.000470042
RP11-565F19.2	1.03058	0.663095	0.000478061
SCARNA9	1.05249	1.8883	0.000478061
RP11-385G16.1	1.06115	2.1557	0.000478061
RP11-23P13.6	1.10574	0.579435	0.000485249
CTD-2020K17.4	2.15847	1.36397	0.000485249
CTB-46B19.2	2.36533	1.66255	0.000485249
PRC1-AS1	4.73083	2.6396	0.00049453
AC016738.4	1.30985	0.726044	0.000502983
RP11-799B12.1	3.08521	1.90023	0.000502983
LINC00599	1.12312	4.39246	0.000502983
RP11-139J15.2	1.29967	2.05751	0.000513612
FAM13A-AS1	0.353493	0.540736	0.000520341
RP11-817I4.1	1.31272	0.728492	0.000520341
RP11-362K14.7	3.7627	2.18084	0.000520341
RP11-57H14.2	1.59209	2.28328	0.000520341
HAR1A	0.368764	1.12384	0.000520341
SNORD64	0.709457	1.16501	0.000531322
RP11-707G14.7	0.435274	0.702119	0.000539363
RP5-906C1.1	2.04956	1.07351	0.000539363
RBMS3-AS3	0.312596	0.630107	0.000539363
RP11-799B12.4	1.58725	1.08428	0.000545443
HORMAD2-AS1	1.22622	0.839996	0.000545443
RP11-47I22.1	1.0298	3.45232	0.000545443
GBM_LOC006520	0.110725	0.699901	0.000556934
PPP3CB-AS1	10.1168	15.5905	0.000579503
TMEM246-AS1	0.864643	1.51714	0.000579503
GBM_LOC039589	0.362662	0.526216	0.000602945
AC010649.1	4.27532	9.94113	0.000602945
RP11-182J1.17	0.93719	1.41863	0.000614423
RP11-172H24.4	7.93698	11.4881	0.000614423
PSMB8-AS1	6.2475	3.45241	0.000636824
AC000068.5	0.405418	0.697326	0.000636824
RP11-182J23.1	0.46972	1.41479	0.000636824
RP11-713C5.1	0.418321	1.3619	0.000664958
RP11-452L6.1	1.93707	2.79979	0.000675059
RP11-227B21.2	0.946337	5.35391	0.000675059
LINC00609	0.248463	0.532784	0.000686594
MIR3911	2.25657	3.46555	0.000686594
C15orf37	1.17363	0.769419	0.000686594
AC012613.2	0.353851	0.594441	0.000699612
RP11-638I2.4	0.305626	0.879386	0.000712868
SERHL	1.45072	2.33204	0.000712868
DANCR	51.2083	76.5315	0.00072373
XLOC_078028	0.746328	1.07969	0.00072373
CTA-250D10.23	0.791573	1.32551	0.00072373
KANTR	0.629745	0.959681	0.000734777
RP11-557H15.4	2.48061	0.820711	0.000734777
CTC-241F20.3	1.49562	0.881568	0.000734777
MIR219A2	2.23686	7.43755	0.000748692
LA16c-360H6.1	0.428466	0.66806	0.00076286
LINC00882	5.57998	8.60961	0.00076286
RP11-156K23.3	1.21725	0.742812	0.000775903
Cabili_2025	0.421347	0.69019	0.000775903
DYX1C1-CCPG1	2.16086	1.36021	0.000789171
RP11-701H24.3	1.72897	3.70985	0.000789171
CTD-3099C6.7	0.787701	0.501501	0.000789171
RP11-950C14.10	0.419877	0.608291	0.000822158
GLYCTK-AS1	2.0792	3.10471	0.000837662
Cabili_782	0.408165	0.693887	0.000837662
SNHG14	25.1671	35.7069	0.000853447
RP11-44N11.3	0.58478	1.09922	0.000864989
RNF157-AS1	3.06089	5.66707	0.000864989
LINC01006	3.3225	6.55377	0.000864989
RP11-182L21.6	2.33501	3.4917	0.000864989
CTC-273B12.5	1.25006	0.810002	0.000882809
RP11-299G20.2	0.363625	0.70477	0.000896323
RP11-714G18.1	0.331389	0.616272	0.000896323
RP13-726E6.2	0.599845	1.14263	0.000896323
RP11-762H8.4	13.9112	6.94208	0.000928766
CTD-3252C9.4	3.03216	1.74901	0.000928766
AC007563.5	4.37622	1.94251	0.000928766
RP11-181G12.2	1.36135	1.96423	0.000928766
RP1-111C20.4	0.813291	1.24754	0.000943011
XXbac-BPGBPG55C20.1	0.314407	0.616036	0.000943011
LL22NC03-2H8.5	0.257836	0.535496	0.000943011
GBM_LOC004609	0.336544	0.571881	0.000943011
RP11-227G15.10	0.836656	1.40905	0.000978766
SERTAD4-AS1	2.99475	1.3109	0.000978766
TOB1-AS1	1.44256	2.39985	0.000995457
RP11-235E17.6	1.07962	0.734372	0.000995457
RP11-342M3.5	15.9143	26.4738	0.00103831
GS1-124K5.4	12.8706	8.2622	0.00108109
ZNF350-AS1	0.924278	2.56274	0.00108109
RP3-399L15.3	1.59853	2.42551	0.0011031
CISTR	0.371453	0.722213	0.00112366
RP11-75I2.3	1.01589	2.43947	0.00112366
AC007283.5	3.76225	2.18196	0.00114459
RP11-284F21.7	94.8368	171.864	0.00116782
AP001258.4	2.1752	1.52276	0.00121163
RP3-523E19.2	0.461212	0.855039	0.00121163
INTS6-AS1	2.83643	4.19931	0.00121163
ENO1-AS1	0.431842	0.693072	0.00121163
RP11-290L1.3	37.7033	76.2023	0.0012301
AC021224.1	7.39448	11.1214	0.00124888
ALDH1L1-AS1	1.8262	1.05865	0.00124888
RP11-638I2.8	3.19697	1.72775	0.00126592
RP11-48B3.4	1.53148	1.01289	0.00126592
CTD-3193K9.4	1.356	0.849606	0.00126592
RP11-247A12.8	3.85039	2.09657	0.00128941
AC020594.5	1.19177	0.772137	0.00131331
MANEA-AS1	0.33706	0.578201	0.00131331
RP11-103H7.5	3.52527	7.18916	0.0013334
AC114730.3	2.65799	6.22195	0.0013334
RP11-214N9.1	1.02753	1.7296	0.0013334
RP11-128A17.1	3.02866	4.71326	0.00135809
CDKN2B-AS1	0.266725	0.595638	0.00135809
RP11-679B19.1	1.33424	0.608844	0.00138104
LINC00893	1.14321	0.574987	0.00138104
TMCC1-AS1	2.07442	3.27047	0.00140438
C21orf88	1.69491	0.998598	0.00140438
RP11-10K16.1	1.84849	1.27165	0.00142588
RP11-258F22.1	0.369758	0.624432	0.00142588
RP11-500G22.4	0.564996	1.24446	0.00142588
LA16c-380H5.5	1.12955	1.90427	0.00144773
RP11-47A8.5	1.38578	2.06429	0.00144773
CTC-203F4.2	1.55892	2.40774	0.00144773
XLOC_009110	0.489204	0.921909	0.00150167
RP11-104H15.9	1.33105	0.912933	0.00150167
PITRM1-AS1	0.791076	1.17901	0.00150167
GS1-358P8.4	4.00939	2.58671	0.00155751
RP5-1007F24.1	1.18296	2.71474	0.00155751
Cabili_134	0.878536	2.07258	0.00155751
RBFADN	0.645928	0.964595	0.00158376
RP11-435O5.4	0.53688	0.886907	0.00158376
RP11-574K11.24	2.75977	3.91673	0.00158376
USP2-AS1	1.14404	0.652706	0.00160559
RP4-555D20.1	0.3696	0.772065	0.00160559
ARHGAP5-AS1	3.12875	4.48864	0.00160559
RP11-660L16.2	6.46467	9.42803	0.00163757
AC005754.8	0.477987	0.859383	0.00166514
RP11-307B6.3	1.92722	4.21587	0.00166514
DPH6-AS1	2.15074	1.24886	0.00166514
CTD-2292P10.4	0.542871	1.06248	0.00173195
RALY-AS1	1.27848	0.874907	0.00175581
AC005197.2	1.20375	0.690672	0.00175581
RP11-454H19.2	0.755341	1.40293	0.00175581
RP11-402D21.2	2.26941	3.89444	0.00175581
AC074212.5	5.07022	2.53261	0.00182334
RP11-169D4.2	0.305267	0.734434	0.00182334
RP5-826L7.1	1.23347	0.830948	0.00182334
RP11-155G14.6	1.09056	0.694179	0.00185391
RP11-618M23.5	0.295839	0.527207	0.00185391
RP3-425C14.4	6.18424	8.97394	0.00188775
AC012442.5	1.05969	1.5072	0.00192499
RP11-981G7.6	1.85467	2.74952	0.00195435
CTD-2267D19.3	0.939595	0.537265	0.00195435
RP4-798A10.7	2.66504	3.9853	0.00198993
SNHG19	48.296	83.9016	0.00198993
CTD-2620I22.7	3.8032	2.5717	0.0020232
AC137932.5	0.359046	0.524847	0.0020232
RP11-31F15.2	0.461227	0.711844	0.0020232
RP1-261D10.2	1.18795	0.770097	0.00205997
RP11-768F21.1	1.15198	0.690307	0.00209737
RP4-797C5.2	3.64812	6.51053	0.00209737
RP11-457M11.5	0.941031	1.37146	0.00213542
RP4-549L20.3	2.36192	1.47074	0.00216792
AC068831.10	0.467523	0.707041	0.00216792
DUXAP8	3.32703	5.69062	0.00216792
RP11-269C23.4	0.430945	0.812666	0.00216792
GBM_LOC037116	0.487117	0.88959	0.00220406
GBM_LOC016392	1.97005	2.91039	0.00220406
HCP5	3.91769	2.24005	0.00220406
RP11-930P14.1	0.385176	0.836161	0.00224078
RP11-517A5.5	0.678334	0.978384	0.00224078
GBM_LOC025565	0.384231	0.659509	0.00224078
AC016910.1	0.354086	0.533274	0.00233235
RP11-373N22.3	0.439194	0.646831	0.0024172
RP11-775C24.5	2.49028	1.75875	0.0024172
GS1-72M22.1	0.566107	1.2288	0.00256064
RP11-597D13.9	3.3502	1.761	0.00256064
RP11-455B3.1	1.53753	0.586313	0.00260657
CTD-3193K9.11	1.07818	1.83596	0.00265327
WDFY3-AS2	4.99604	8.10801	0.00265327
RP11-981G7.2	0.624865	1.01822	0.00270076
Cabili_2499	1.78674	0.852356	0.00280588
RP11-16P6.1	1.07958	1.70223	0.00280588
CTB-25B13.5	0.638491	0.944636	0.00285593
CTD-2020K17.1	1.01333	0.652771	0.00291081
RP11-876N24.5	1.1566	0.740312	0.00296261
RP11-552F3.9	2.27032	1.37965	0.00300295
AC008440.5	15.8814	9.27109	0.00300295
SNHG10	6.0487	8.72237	0.00300295
GBM_LOC039777	0.491347	0.717711	0.00305216
CKMT2-AS1	2.77012	4.32426	0.00305216
LINC00511	28.7743	45.4963	0.00305216
CTB-129O4.1	1.30066	1.91424	0.00310635
Cabili_378	0.737867	1.21911	0.00310635
CTA-250D10.19	1.00577	2.13879	0.00316145
FAM201A	0.507283	1.15592	0.00321314
FBXL19-AS1	0.771672	0.507541	0.00327002
SNHG9	54.7491	37.6386	0.00327002
RP4-673M15.1	1.25343	0.826766	0.00331897
LA16c-349E10.1	1.30745	0.736876	0.00331897
RP11-474G23.3	0.453869	0.740336	0.00331897
CTD-2201E18.3	2.15349	1.44188	0.00338212
AC004158.3	4.0596	6.28709	0.00357837
AC012358.8	0.901159	0.610905	0.00357837
CAHM	3.28286	5.01063	0.00362212
LINC01240	1.76439	1.20277	0.00362212
RP3-460G2.2	1.61655	0.480637	0.00362212
CTD-2510F5.4	2.78282	1.83899	0.00362212
Cabili_1493	4.36148	9.76821	0.00374561
RP11-1182P23.5	0.426046	0.749646	0.00374561
RP11-535A19.1	0.759726	1.22056	0.00374561
RP11-56B16.4	7.38381	4.98523	0.00380635
GBM_LOC013780	4.94899	2.86215	0.00380635
RP11-849N15.3	1.07923	0.639227	0.00380635
RP11-1263C18.1	0.743185	2.5908	0.00387811
GBM_LOC025701	1.1099	1.5981	0.00394088
RP11-523G9.3	0.805623	0.50552	0.00394088
LGG_LOC001868	2.02885	1.41671	0.00394088
GBM_LOC042831	0.56	1.22239	0.00400463
GRPEL2-AS1	2.00009	1.36312	0.00400463
RP11-334C17.5	1.11434	1.73586	0.00406937
RP5-1121E10.2	1.50904	1.02937	0.004218
LINC01521	1.46059	2.42682	0.004218
GLIDR	1.94333	3.08242	0.00428598
GS1-114I9.1	4.63466	2.91018	0.00434949
Cabili_1079	0.0424115	0.83892	0.00434949
RP11-131L12.4	0.672969	1.03249	0.00434949
RP11-411B10.3	0.894367	1.28002	0.00434949
GBM_LOC039272	0.342221	0.67969	0.00451908
RP11-483F11.7	0.696117	1.17938	0.00458583
CTD-2538C1.2	2.37066	1.59629	0.00458583
RP11-762L8.6	0.928967	1.38775	0.00458583
RP11-624G17.3	4.64065	8.35433	0.00458583
LGG_LOC013371	0.910582	0.617461	0.00465357
RNF219-AS1	1.91881	5.80324	0.00465357
RP11-111M22.5	0.257108	0.517123	0.00465357
RP11-74H8.1	34.6604	67.7863	0.00465357
RP11-229P13.23	8.91414	18.3898	0.00474006
RP11-767C1.2	0.546171	0.845279	0.00482804
NEAT1	78.1847	44.9087	0.00500233
RP3-465N24.6	0.856023	0.547542	0.00508216
CTD-2544H17.2	0.420654	0.782691	0.00508216
CTD-2666L21.1	2.2335	1.50191	0.00516961
LINC01116	1.48934	0.60021	0.00516961
RP3-395M20.12	0.432349	0.794755	0.00525197
RP11-820L6.1	4.14969	2.29543	0.00525197
HAR1B	0.153365	0.555328	0.00533557
CTD-2647L4.5	20.9742	13.7972	0.00540719
FLG-AS1	0.250725	0.539906	0.00540719
LINC01024	1.01414	1.47477	0.00540719
CTA-445C9.14	3.98324	5.66389	0.00540719
LINC00906	0.263509	0.653774	0.00545993
ERICH6-AS1	2.55427	1.63941	0.00545993
RP11-547I7.1	0.295279	0.588414	0.00545993
TNKS2-AS1	1.23228	2.22438	0.00545993
RP11-359E10.1	4.45382	2.42687	0.00556023
AF001548.5	2.69261	1.78634	0.00564859
AC092675.3	1.81565	1.05078	0.00564859
RP11-408A13.4	0.926149	1.44301	0.0057314
RP11-23E10.3	0.324803	0.556654	0.0057314
CTD-2555K7.2	0.693098	1.13091	0.0057314
AC005339.2	9.85189	6.46591	0.0057314
LINC00957	1.78534	0.896351	0.00582933
RP11-210M15.2	4.55816	6.98851	0.00591469
RP5-1068E13.7	1.02855	1.64529	0.00591469
RP5-1142A6.9	3.43648	2.38698	0.00591469
FOXP4-AS1	0.932638	0.471208	0.0062442
RP11-496H1.2	2.88454	4.08781	0.0062442
RP11-352G9.1	0.328079	0.511442	0.00635776
SPACA6P	8.16369	5.22973	0.00646558
RNVU1-14	0.903602	0.613196	0.00646558
AC004471.9	1.26535	2.19539	0.00656735
RP11-69M1.6	0.663993	1.0232	0.00656735
RP1-8B1.4	0.540504	1.07688	0.00656735
RP1-167F1.2	0.525569	0.844032	0.00665501
GBM_LOC032111	0.475003	1.13492	0.00665501
RP11-550I24.2	0.59416	0.998807	0.00665501
CTC-336P14.1	1.31126	1.98335	0.00676754
RP11-482M8.3	0.304476	0.63078	0.00676754
RP11-482H16.1	0.968465	1.75822	0.00685785
RP11-16N11.2	1.03712	1.53224	0.00685785
RP11-179A16.1	0.322798	0.605406	0.00697358
RP4-758J18.10	1.17776	0.689735	0.00705848
RTCA-AS1	3.11993	2.16387	0.00705848
RP11-127B20.2	3.04012	4.68164	0.00705848
CTC-246B18.10	12.4189	8.31945	0.00705848
RP11-732A19.5	22.3316	15.3995	0.00714457
RP11-238F2.1	0.570148	1.1963	0.00714457
RP11-379L18.1	1.66535	2.43901	0.00714457
Cabili_2300	0.845022	1.39002	0.00725658
CTD-2260A17.1	0.743498	0.513361	0.00725658
RP11-420N3.3	2.12253	3.09313	0.00738701
CTD-2265O21.7	2.67739	1.81286	0.00749405
CTD-2176I21.2	0.534176	1.44247	0.00749405
LINC00643	1.55963	4.39792	0.00749405
LINC00173	0.917146	1.82627	0.00749405
AC015933.2	3.98738	2.29017	0.0076026
RP11-307C19.2	0.552367	1.16105	0.0076026
AC007271.3	0.804686	0.522498	0.0076026
CTD-2540B15.7	10.4943	5.15409	0.00767822
RP11-152P23.2	1.58429	1.1079	0.00767822
LINC00843	0.364464	0.628511	0.00780689
TINCR	0.494059	0.824746	0.00793754
AP000230.1	2.662	1.72712	0.00807918
RP11-165A20.3	0.874144	1.43279	0.00822315
RP11-420A23.1	0.359593	0.578492	0.00836022
CTB-58E17.5	0.482314	0.792181	0.00849001
WNT5A-AS1	0.767225	0.527697	0.00860276
RP11-626G11.5	1.34851	0.944118	0.00871705
RP11-797H7.5	0.999312	0.689237	0.00886176
RP11-799D4.4	0.492496	0.757789	0.00898914
AC005754.7	2.4159	1.06264	0.00898914
Cabili_2207	0.343353	0.712588	0.00898914
Cabili_2865	0.861198	0.567913	0.00927917
RP11-864G5.3	9.33432	5.88579	0.00927917
RP11-473M20.11	1.19537	0.661374	0.00978812

## Sheet: FUBP1
lncRNA	Mutation median FPKM	WT median FPKM	FDR
CTB-119C2.1	3.36369	0.856702	1.91466e-15
CISTR	2.26742	0.607211	8.9972e-12
Cabili_1318	2.64345	0.630709	9.42182e-12
NFIA-AS2	1.52165	6.02386	4.25846e-11
AC003102.3	1.3988	0.531565	1.18258e-10
AC074212.5	1.23384	2.79335	1.76137e-10
AC068057.1	5.24925	1.19636	2.66578e-10
RP11-124N14.3	23.4266	84.3094	2.66578e-10
RP11-421L21.3	3.72085	6.68265	2.7074e-10
RP11-31F19.1	13.278	5.57994	2.7074e-10
RP11-804H8.6	0.531344	1.18966	3.45473e-10
AC144449.1	1.16908	0.720285	3.45473e-10
RP11-74E22.8	9.92013	5.84441	4.68456e-10
RP1-293L6.1	4.70326	1.31713	6.55763e-10
RP1-239B22.5	2.58543	1.1045	7.72253e-10
CTD-3220F14.3	1.36257	2.20585	8.83545e-10
RP11-307C19.2	3.19746	1.015	8.83545e-10
AC002398.13	1.51007	2.7255	1.26125e-09
RP5-1042I8.7	1.23545	2.15147	1.67474e-09
RP11-279F6.1	3.76315	1.66968	1.67474e-09
ST3GAL5-AS1	1.44742	0.640377	1.67474e-09
RP11-1C8.7	3.37281	1.01834	2.77161e-09
LRP4-AS1	1.51154	0.88737	2.77161e-09
FBXL19-AS1	1.12002	0.493654	3.47846e-09
AC009404.2	1.58496	0.734615	3.9161e-09
TOB1-AS1	3.51008	2.22497	4.52828e-09
RP11-155G14.6	0.328722	0.754578	4.52828e-09
RP11-229P13.23	44.2034	15.3245	4.87636e-09
LINC01415	2.15184	0.813696	4.87636e-09
SNAP25-AS1	3.77362	1.2946	4.87636e-09
RP11-341G23.4	0.19962	0.764666	4.87636e-09
RP4-789D17.3	3.23316	5.30145	5.43097e-09
RP5-930J4.4	32.6517	47.7268	5.95975e-09
RP11-505P4.6	1.25776	0.619026	5.95975e-09
GBM_LOC006520	1.66277	0.562711	5.95975e-09
GBM_LOC042318	2.23994	0.643006	5.95975e-09
Cabili_2847	2.93148	0.678204	6.9017e-09
PDCD4-AS1	4.82478	2.5426	8.73507e-09
RP11-61L14.6	16.7946	7.54973	9.94873e-09
RP11-549B18.1	3.20178	1.83934	9.94873e-09
AC016700.5	6.15035	3.57381	1.15266e-08
RP11-552M11.8	0.406984	0.847048	1.18954e-08
U73166.2	2.16091	0.988148	1.18954e-08
RP11-347E10.1	0.100792	0.623717	1.64147e-08
RP11-135L13.4	73.059	35.7919	1.64147e-08
HAS2-AS1	1.23468	2.72879	1.90265e-08
RP4-614O4.11	3.60837	1.42858	2.17062e-08
CTB-32O4.3	0.250089	0.64207	2.17062e-08
AC004158.3	11.9417	5.75253	2.17062e-08
CRNDE	0.652962	2.01467	2.48358e-08
RP11-107F6.3	0.520589	0.816271	2.48358e-08
BAALCOS	13.6791	5.87864	2.48358e-08
RP11-56P23.1	1.41751	2.15826	3.08565e-08
PTOV1-AS1	2.85089	4.25845	3.51723e-08
LINC01102	6.32748	3.04608	3.57315e-08
C14orf23	3.37784	1.22944	3.97056e-08
RGMB-AS1	3.76145	2.03545	4.13999e-08
RP11-776H12.1	0.230072	0.551776	4.56199e-08
RP11-357K6.1	5.69466	2.1053	4.56199e-08
RNU7-1	0.972966	0.581875	4.56199e-08
RP11-98D18.1	5.20885	2.20166	6.45041e-08
RP4-758J18.2	9.64691	13.6577	6.45041e-08
RP11-220C2.1	3.84817	1.77766	6.46199e-08
LINC01105	25.4662	8.35643	6.46199e-08
RP11-9E17.1	0.97817	0.580692	6.47012e-08
RP1-43E13.2	0.907462	1.58123	7.19402e-08
VLDLR-AS1	1.18542	0.579982	7.45074e-08
RP3-518E13.2	33.7555	17.1909	1.07578e-07
RP11-708J19.1	1.81062	1.1763	1.23033e-07
RP11-551L14.6	2.08351	0.965956	1.23033e-07
CTD-2085J24.4	1.90214	2.87677	1.23033e-07
RP1-50O24.6	5.83541	8.70956	1.38173e-07
HAR1B	1.01723	0.431675	1.38173e-07
RP13-890H12.2	6.67163	4.2085	1.39412e-07
RP11-152N13.16	1.23915	0.57039	1.39412e-07
DDX11-AS1	1.54856	0.886145	1.39412e-07
HAR1A	2.08787	0.952817	2.17008e-07
MLLT4-AS1	1.35714	0.582779	2.23112e-07
LGG_LOC019760	1.00318	0.566028	2.23917e-07
CPB2-AS1	3.37457	1.92084	2.26582e-07
RP11-307B6.3	10.1439	3.7911	2.27466e-07
LINC00853	1.42982	0.738763	2.46582e-07
RP11-467L24.1	0.13647	0.675776	2.55713e-07
RP1-184J9.2	0.382144	0.553602	2.9557e-07
RP11-713P17.3	8.29138	4.28322	2.96855e-07
RP11-834C11.4	1.4718	5.03247	3.42981e-07
RP11-148K1.12	5.97994	9.81441	3.473e-07
LA16c-380A1.2	1.12694	0.512651	3.57367e-07
RP11-258F1.2	3.68036	2.20289	3.90368e-07
AP001062.7	3.70861	2.44344	4.21317e-07
RP11-527D7.1	3.87066	1.37078	4.81062e-07
RP11-82L18.2	4.7527	2.05851	4.81062e-07
CTB-187M2.2	6.247	3.5986	4.95108e-07
RP4-773N10.4	1.80431	2.73732	5.25315e-07
TPTEP1	1.3348	7.65931	5.25315e-07
CTC-205M6.1	1.89627	1.18564	5.62494e-07
CTD-2380F24.1	4.18233	1.922	6.43726e-07
AC011330.13	3.9319	2.18653	6.47338e-07
LINC00263	8.9452	5.09298	6.56142e-07
Cabili_360	2.39275	0.544583	7.20494e-07
GBM_LOC039120	0.382822	0.7349	7.20494e-07
PAXBP1-AS1	2.96529	1.91734	7.59427e-07
SZT2-AS1	2.26542	3.23087	8.28909e-07
RP4-789D17.5	1.01308	1.52811	8.33928e-07
Cabili_2240	12.0164	6.65436	8.6546e-07
Cabili_2815	5.26303	9.07864	9.56413e-07
ZNF529-AS1	2.05078	3.02242	9.56413e-07
LINC00599	9.99293	3.73883	9.56413e-07
RP11-548P2.2	1.72003	0.974769	9.69992e-07
WDR86-AS1	1.20911	0.61522	9.91441e-07
Cabili_1401	1.83999	1.00263	1.07507e-06
AC002398.11	2.61809	3.82129	1.07507e-06
RP11-458J1.1	7.07723	4.89104	1.07507e-06
AC114803.3	4.71247	1.55776	1.07507e-06
CTD-2366F13.1	3.88341	2.73149	1.07507e-06
C21orf88	0.531595	1.11604	1.07507e-06
RP5-864K19.4	1.08332	1.73261	1.07507e-06
CYP17A1-AS1	6.74023	3.4038	1.07507e-06
RP11-264M12.2	6.97568	3.94322	1.20914e-06
LA16c-360H6.1	1.05882	0.615825	1.24602e-06
AC140912.1	2.27724	0.98895	1.25499e-06
GRPEL2-AS1	2.06866	1.3362	1.41176e-06
MIR124-2HG	3.64184	1.62733	1.42125e-06
LA16c-380A1.1	2.31931	1.28792	1.42125e-06
RP11-8P11.3	2.37673	1.19841	1.42125e-06
KCNK15-AS1	1.74382	1.06959	1.56238e-06
SEMA3B-AS1	3.81607	1.79436	1.57388e-06
LINC00662	5.59145	9.58262	1.57388e-06
RP1-20B21.4	28.6435	43.5816	1.57388e-06
SNAI3-AS1	4.97824	3.19185	1.57388e-06
CTC-255N20.1	1.42724	0.620737	1.83799e-06
RP11-454E5.4	5.43458	3.42516	1.83799e-06
Cabili_1019	3.44363	5.20148	1.83799e-06
NRSN2-AS1	4.70469	3.07804	1.85272e-06
RP11-529K1.2	1.9674	1.28702	1.85272e-06
GBM_LOC012292	0.220888	1.18518	1.85329e-06
CH507-39O4.1	1.05651	0.634137	1.86795e-06
CTD-2201G16.1	4.45907	1.40114	2.06805e-06
Cabili_1192	1.80028	1.17171	2.1479e-06
LGG_LOC033929	1.27432	0.734116	2.16505e-06
FOXD3-AS1	0.0971656	1.17454	2.54326e-06
AC062021.1	13.1931	4.32522	2.73405e-06
RP11-64K12.4	8.58813	4.67708	2.73405e-06
RP11-799D4.4	1.03292	0.699282	2.86231e-06
GBM_LOC025187	6.96825	1.91817	3.28438e-06
RFPL1S	4.77562	1.83967	3.33565e-06
AC159540.1	10.8375	5.96323	3.41289e-06
LINC01063	3.18709	2.13225	3.69312e-06
FAM222A-AS1	2.47346	1.52714	3.69312e-06
CTC-490E21.10	0.518628	0.807008	3.72701e-06
CTD-2574D22.2	0.970369	0.597527	3.72701e-06
RP11-506K6.4	0.342817	0.609397	3.95604e-06
CTD-2650P22.2	1.03638	0.629402	4.2762e-06
RP11-16N11.2	2.43622	1.42691	4.34349e-06
PCED1B-AS1	5.89576	11.9321	4.37985e-06
LINC01150	0.296052	0.718492	4.44901e-06
LHX5-AS1	5.74262	0.821771	4.91963e-06
DNAJC3-AS1	4.09858	2.70194	4.99743e-06
GTSE1-AS1	2.00278	1.25953	5.64596e-06
RP11-579D7.4	2.14313	1.26267	5.78415e-06
RP11-923I11.3	5.96685	2.83388	5.83362e-06
RP5-890E16.2	0.934289	0.611048	6.57913e-06
RP11-482M8.3	1.35326	0.579304	6.73154e-06
MIR7-3HG	4.84749	1.23194	7.42633e-06
RNF157-AS1	7.89792	5.22346	7.48994e-06
RP11-347C12.10	1.81844	1.20247	7.55429e-06
FAM182A	4.46482	8.09646	7.56507e-06
CTB-58E17.9	1.03387	0.505497	7.64185e-06
CTD-2545M3.8	6.32223	2.44981	7.64185e-06
RP11-756G20.1	0.842208	0.483695	7.65345e-06
FAM66C	5.95029	3.60073	8.71166e-06
RP3-333H23.9	4.49518	2.75783	8.78794e-06
TMEM246-AS1	2.11413	1.38149	9.63506e-06
AC005356.1	1.70561	0.988313	9.87512e-06
GBM_LOC026051	3.29958	2.26029	9.87512e-06
XXbac-BPG299F13.17	1.9502	1.16213	1.01219e-05
DLEU2	2.52914	1.49196	1.01219e-05
HCG22	0.223059	0.938141	1.08435e-05
RP11-1006G14.4	1.23997	1.77316	1.11149e-05
RP4-794H19.1	0.603095	1.013	1.11352e-05
RP11-797D24.4	8.06109	5.39506	1.11558e-05
RP5-1054A22.4	2.08148	1.15621	1.1577e-05
ST7-OT4	0.451382	0.642508	1.21409e-05
RP11-864G5.3	2.98925	6.43433	1.21641e-05
CTA-276F8.1	0.766392	1.08686	1.27611e-05
CTB-147N14.6	1.05595	2.03154	1.28764e-05
Cabili_1137	1.01882	0.704551	1.29024e-05
AP000438.2	1.6533	0.689895	1.36247e-05
RP4-671G15.2	0.579848	0.964509	1.37482e-05
RP5-997D16.2	0.646159	0.94097	1.40975e-05
CH507-39O4.2	1.78224	0.959642	1.41272e-05
AC009005.2	0.492465	1.02415	1.41573e-05
WDR11-AS1	1.27702	2.09726	1.60522e-05
CDIPT-AS1	0.819152	0.481276	1.63492e-05
RP5-882C2.2	4.19887	2.71786	1.65002e-05
AC009120.5	1.28944	0.757049	1.66528e-05
CTC-490E21.11	0.681306	1.13523	1.77014e-05
FOXG1-AS1	1.93678	1.14813	1.81135e-05
RP11-598F7.6	2.52145	0.974762	1.84077e-05
RP11-454H19.2	2.01219	1.31732	1.88362e-05
RP11-98I9.4	2.70889	1.5227	1.9011e-05
LL09NC01-139C3.1	1.5423	0.806554	2.08644e-05
WEE2-AS1	1.84127	3.22302	2.11611e-05
RP11-307C18.1	0.447561	0.724588	2.36575e-05
U91328.19	1.78275	1.17112	2.66021e-05
RP11-817I4.1	1.04187	0.720941	2.66693e-05
RP11-946P6.4	1.14625	0.516397	2.76594e-05
LINC00476	3.52721	5.10382	2.773e-05
RP11-1081L13.4	4.09304	2.32273	2.82531e-05
ZNRD1-AS1	3.00556	2.03781	2.82531e-05
BRWD1-AS2	0.945889	0.636414	2.95994e-05
VCAN-AS1	21.0856	33.872	3.04427e-05
RP11-1263C18.1	4.43636	2.10879	3.04427e-05
LINC01351	11.4502	7.6129	3.47048e-05
RP4-728D4.2	0.367185	0.558047	3.47048e-05
RP11-245J24.1	2.23337	0.661533	3.47048e-05
RP11-140A10.3	2.02486	1.2267	3.47048e-05
GBM_LOC025565	1.01302	0.614436	3.47048e-05
RP11-480C22.1	2.19481	4.97287	3.48922e-05
LINC01128	4.80701	6.85218	3.48922e-05
CTD-2620I22.7	1.79611	2.76043	3.50826e-05
RP11-71E19.2	0.391651	0.718255	3.5179e-05
AC053503.11	5.90313	3.36252	3.82026e-05
LINC00652	1.77919	1.04103	3.84149e-05
CTD-2619J13.9	1.05809	1.60099	4.38635e-05
AC000068.10	1.8655	1.07584	4.58518e-05
LGG_LOC027853	2.71949	1.13676	4.6904e-05
AC005220.3	2.42336	1.45803	4.98969e-05
GBM_LOC039900	0.422347	1.12983	4.98969e-05
LINC00463	1.44705	0.782826	5.047e-05
RP11-1017G21.5	3.78664	2.59022	5.047e-05
Cabili_340	5.42949	3.18959	5.17369e-05
RP11-124D2.3	81.4909	53.4457	5.18888e-05
RP11-2E11.5	1.86531	1.0298	5.53966e-05
RP4-761J14.10	0.839178	1.32604	5.59255e-05
RP3-395M20.12	2.62688	0.640274	5.63913e-05
ISX-AS1	1.91231	0.542131	5.63913e-05
LINC01431	2.79227	1.82218	5.63913e-05
RP11-74H8.1	132.402	63.0802	5.63913e-05
RP11-318M2.3	371.903	256.01	5.6561e-05
RP11-441O15.3	0.898685	0.580922	5.67318e-05
TAPT1-AS1	0.734904	0.488445	5.80332e-05
FAM201A	2.93413	1.03032	5.97532e-05
RP11-17E13.2	0.465915	0.805946	6.21006e-05
DGCR9	3.97069	2.31206	6.21006e-05
RP11-143A12.3	1.10749	0.577746	6.21006e-05
RP11-109P14.10	6.01211	8.6876	6.2291e-05
AC079305.11	2.22572	1.09523	6.33031e-05
RP11-54O7.17	0.764411	1.65831	7.04519e-05
GBM_LOC009981	0.860193	0.510636	7.34729e-05
RP11-463C8.7	1.16237	0.517026	7.61005e-05
AC159540.2	2.08935	1.1242	7.61005e-05
LINC00237	14.3109	7.7711	8.01063e-05
RP11-47I22.1	6.96201	2.45842	8.01063e-05
RP11-105N14.1	0.722957	1.10154	8.03561e-05
RP11-143K11.5	1.99931	0.817766	8.05935e-05
RP11-1072A3.4	1.98097	1.28546	8.05935e-05
RP11-71E19.1	0.357863	0.59773	8.05935e-05
GBM_LOC039777	0.374665	0.722221	8.18969e-05
CTC-471F3.6	0.232686	0.691485	8.93144e-05
RP11-552D4.1	3.19008	9.22226	9.04593e-05
RP11-273G15.2	1.43388	0.85167	9.13305e-05
RP11-196G11.4	1.28499	0.769107	9.16214e-05
RP11-594N15.3	1.29732	0.757894	9.22083e-05
RP11-388P9.2	1.60689	0.921981	9.22083e-05
LINC01287	3.31872	2.19358	9.25043e-05
RP11-18H7.1	1.3912	0.762153	9.33982e-05
LLNLR-470E3.1	0.585459	1.28582	0.000100845
AC007319.1	0.24082	0.789798	0.000101495
RP11-402D21.2	8.00511	3.6113	0.000101834
RP4-791M13.3	1.03381	1.63464	0.000101834
AC002456.2	1.40375	2.42413	0.000102166
RP11-185E8.1	0.24486	0.732799	0.000102835
TNK2-AS1	1.02813	0.613711	0.000103173
CH17-437K3.1	0.518525	0.939072	0.000104517
RP11-97N19.2	3.74158	1.93247	0.000112808
RP4-718D20.3	2.74816	1.21518	0.000113899
RP1-111D6.2	0.533329	1.25879	0.000116468
RP11-572O6.1	1.13296	0.579769	0.000117666
Cabili_1991	1.74605	2.47411	0.000117666
CXorf28	3.29735	0.972727	0.000117666
RP11-464F9.20	1.23973	0.839334	0.000126197
RP13-941N14.1	1.54855	1.05941	0.000128277
AC104655.3	3.38009	1.7084	0.000128708
RP11-626G11.3	4.67423	6.71462	0.000129143
AC000068.9	4.34844	2.93714	0.000129641
VPS9D1-AS1	1.79552	1.06523	0.000129641
AC114730.7	5.01581	2.59862	0.000129641
SLC6A1-AS1	1.77134	1.01981	0.000130903
RP11-48B3.4	0.713541	1.1033	0.000137684
CTC-338M12.5	1.50518	0.965827	0.000138152
MIR4674HG	1.27603	0.72258	0.000139971
Cabili_1476	4.46422	2.78579	0.000140532
RP11-483F11.7	1.69545	1.08828	0.00014199
HOTAIRM1	0.198313	0.745683	0.000146091
RP11-876N24.5	1.27442	0.727133	0.00014844
CTD-2002J20.1	0.41073	0.736471	0.000154154
RP4-622L5.2	3.77711	5.48503	0.000154259
RP11-181G12.2	1.31606	1.98184	0.000156849
LINC01356	0.349947	0.64959	0.000156849
CTD-2176I21.2	2.9758	1.19792	0.000156849
AC034228.3	2.84103	1.98672	0.000157396
CTD-2341M24.1	0.519362	1.17073	0.000157946
CTB-58E17.5	1.15478	0.742652	0.000158068
RP11-215G15.5	1.72006	0.778338	0.000158068
RP1-257A7.4	2.3372	1.60112	0.000158195
RP1-8B1.4	1.72618	1.01024	0.000158195
GBM_LOC016701	0.974977	0.498303	0.000159743
LINC00910	1.10031	0.726417	0.00017616
CTB-129O4.1	2.81148	1.71833	0.00017616
RP11-848P1.5	2.56946	1.80181	0.00017616
RP11-131L23.2	0.343291	0.517474	0.000177879
CTD-2527I21.4	1.86433	0.650728	0.000178508
Cabili_2865	0.873841	0.556543	0.000199556
RP11-452L6.1	3.8725	2.66814	0.000200258
LGG_LOC021000	2.59952	1.50134	0.00020345
AP001092.4	2.56655	1.52725	0.000207964
LINC00461	72.1426	43.1111	0.000212574
PVRL3-AS1	1.31808	0.849558	0.000216617
SCOC-AS1	2.08002	1.29324	0.000222975
PRKAR2A-AS1	1.99811	1.36309	0.000222975
CHL1-AS2	2.58315	1.57834	0.000223187
AP000255.6	1.08494	0.762312	0.000224774
CTD-2540B15.11	9.63578	17.0588	0.000225574
RP4-657D16.3	1.43083	2.2633	0.000229976
RP11-21L23.3	1.91366	1.13674	0.00023221
LINC00339	6.2132	8.81162	0.000233039
RP4-719C8.1	1.61937	0.985111	0.000241843
RP11-98D18.9	3.51784	2.41316	0.000242097
CACNA1C-AS2	0.499167	0.782028	0.000244447
RP11-160O5.1	1.02808	1.91373	0.000249839
AC004837.4	0.361162	0.614739	0.000250735
CTD-2256P15.2	2.29476	1.61505	0.00025254
RP11-227G15.9	0.797486	0.547249	0.000256544
RP11-20E24.1	0.970002	0.659555	0.000257468
CELSR3-AS1	1.89313	0.864885	0.000258396
RP11-118K6.3	2.70309	1.8863	0.000273338
RP11-104O19.4	1.52993	1.0166	0.000275988
RP3-399L15.3	3.3617	2.27965	0.000277987
EPB41L4A-AS1	85.7294	56.9346	0.000283405
TFAP2A-AS1	2.62859	1.46262	0.000285465
RAMP2-AS1	4.01445	2.50452	0.000285465
CTD-3193O13.11	39.1283	21.763	0.000286503
RP11-867G23.10	1.39021	0.532879	0.000291395
LINC01355	0.609049	0.87583	0.000305227
FOXD1-AS1	2.24409	7.76283	0.000307458
CTD-2291D10.4	1.68822	0.760302	0.000307458
RP11-318C24.2	0.32467	0.519666	0.000313449
RP11-68I18.10	0.998303	0.645258	0.000313449
AC021188.4	3.57564	2.34483	0.000315748
AC000032.2	1.86231	3.56325	0.000326539
RP3-466P17.2	3.33817	2.08201	0.000341173
WNT5A-AS1	0.230489	0.567493	0.000342423
LL0XNC01-7P3.1	0.9329	0.588612	0.000343679
FARP1-AS1	0.533629	0.918936	0.00034415
RP11-266K4.9	6.51491	4.51565	0.000355864
RP1-206D15.6	1.16373	0.705281	0.000357172
MIR3911	5.54567	3.21549	0.000364943
RP11-629G13.1	1.36173	1.97771	0.000383506
ZNF213-AS1	14.7034	10.0108	0.00039094
RP11-263K19.4	33.3131	49.7158	0.000393825
RP3-369A17.4	0.356461	0.918436	0.000394395
RP11-104H15.8	5.84938	3.171	0.000407734
CTC-435M10.12	0.91104	1.30021	0.000412882
CTD-2636A23.2	47.3281	31.3673	0.000423366
RP5-1119A7.17	5.56232	2.43839	0.000434107
RP11-473M20.7	7.13885	4.56201	0.000440871
Cabili_2025	1.02414	0.656871	0.0004557
CTD-3154N5.2	1.07893	0.601278	0.000462784
Cabili_347	3.47484	2.35706	0.000479394
RP1-111D6.3	0.501271	1.46304	0.000483991
GBM_LOC038759	0.818435	0.477419	0.000487579
GBM_LOC014495	5.87983	3.0413	0.000489385
RP11-305K5.1	5.17532	7.65153	0.000495912
RP11-390F4.6	3.10214	2.10763	0.000497752
LINC01141	0.503848	0.992446	0.000502527
GRM5-AS1	4.60293	1.96329	0.000532828
RP11-290L1.3	116.844	67.5329	0.000532828
MCM3AP-AS1	2.29613	1.57782	0.000539666
RP11-337C18.8	2.99571	2.02748	0.000540551
IPO9-AS1	3.21163	2.25386	0.000542571
AC084219.4	3.28542	4.79339	0.000550962
TMCC1-AS1	4.71278	3.11766	0.000552807
RP13-20L14.1	1.39843	0.663247	0.000552807
RP11-54O7.14	17.2195	27.7712	0.000552807
AP005530.2	0.310309	0.564986	0.000569546
LINC01006	4.1021	6.71326	0.000578338
LGG_LOC036929	2.08707	0.962414	0.000586062
RP11-728F11.4	2.58746	1.36523	0.000591671
BCYRN1	14.1455	8.09985	0.000597331
RP11-1055B8.3	8.24725	3.85521	0.000626617
RP11-1017G21.6	1.89575	1.16165	0.000626617
AC113189.5	21.9925	15.5471	0.000638084
CTD-3035K23.7	0.302999	0.654019	0.000649003
LINC01023	2.21841	3.84721	0.000665245
LA16c-325D7.2	0.980715	0.666129	0.000667584
XX-FW83563B9.5	1.385	0.934531	0.000667584
RP11-182J1.13	3.20927	2.14552	0.000667584
RP11-565F19.2	0.48631	0.698315	0.000667584
RP11-21A7A.2	10.3326	6.06006	0.00067395
RP1-266L20.2	2.73344	1.92084	0.000676485
SPACA6P	3.89391	5.51946	0.000719663
FZD10-AS1	1.05103	0.504865	0.000767491
MAFG-AS1	4.50646	2.94566	0.000773262
CTD-2267D19.3	0.965718	0.524695	0.000799259
RP11-556E13.1	0.488906	1.06262	0.000802258
RP11-720L2.4	0.377962	0.589248	0.000805269
RP11-706O15.1	7.01458	4.12636	0.000808229
RP11-132F7.2	1.55293	0.923911	0.000809729
LGG_LOC007388	0.362968	0.580983	0.000811235
RP4-622L5.7	1.04239	1.55834	0.000811235
RP11-400F19.18	1.19847	0.659872	0.000811235
Cabili_2084	50.8415	30.5257	0.000811235
LINC01088	28.475	69.344	0.000814308
RP3-402G11.27	1.52032	0.903073	0.000815861
Cabili_782	0.968762	0.638463	0.000817426
RP3-325F22.5	0.352322	0.572696	0.000869075
LINC01341	0.769622	1.39846	0.000883964
AC007620.3	18.9246	27.5149	0.000887316
IBA57-AS1	0.924235	0.616789	0.000897459
COLCA1	0.332419	0.69569	0.000916322
RP11-108M9.4	2.00014	3.75456	0.000924991
RP1-310O13.7	0.735131	0.505454	0.000981254
LINC01480	1.13412	2.12019	0.000984979
AC068499.10	1.25442	0.780605	0.000994266
RP11-597D13.8	0.918837	1.4605	0.00100946
RMST	1.43941	2.19605	0.00109055
RP11-823E8.3	4.59627	2.39783	0.00109493
GBM_LOC002313	0.895373	1.8116	0.00109493
STXBP5-AS1	1.23208	0.76791	0.00110326
RP11-227B21.2	7.51878	4.72959	0.00110745
RP11-149I23.3	2.16533	1.40295	0.00111392
SNHG18	1.01359	0.575432	0.00111392
RP5-965G21.6	0.980061	0.637448	0.00113064
NS3BP	3.90748	2.16862	0.00119245
CTD-2540B15.7	3.1629	5.73677	0.00122204
LINC00471	0.780515	0.526156	0.00123136
RP11-715J22.6	1.81049	1.2511	0.00124976
FAM212B-AS1	2.36929	1.66847	0.00129798
RP4-549L20.3	1.12422	1.59233	0.0013545
RP11-23E10.3	0.775626	0.526298	0.0013545
RP11-446N19.1	1.68836	1.04074	0.00136711
RP11-154D6.1	23.6463	33.708	0.00137231
RP11-24M17.4	1.85192	1.30902	0.00138801
RP11-373N22.3	0.880957	0.609448	0.00139096
RP4-704D21.2	0.35335	0.58799	0.00139625
RP11-446F17.3	1.49827	0.960646	0.00141227
RP11-192H23.5	859.841	545.817	0.00141227
AC007563.5	1.18425	2.23439	0.00146085
C14orf64	1.64246	2.54653	0.00147199
Cabili_2207	0.416459	0.732651	0.00147759
RP11-848P1.3	1.28713	1.89117	0.00149131
RP1-315G1.3	2.96193	1.9895	0.00153071
A1BG-AS1	0.852498	1.55273	0.00160383
AL161668.5	3.29115	2.22679	0.00160731
RP11-38P22.2	5.60305	3.2381	0.00161342
AP000688.29	1.11744	0.49331	0.0016231
GBM_LOC031703	0.350008	0.581813	0.00167491
GBM_LOC024482	1.45384	0.967901	0.00168231
AC002398.12	10.0963	22.0729	0.00168231
RP11-21L19.1	6.87526	11.8333	0.00168231
RP11-679B19.1	0.387362	0.640799	0.00169786
LINC00894	1.73636	0.90593	0.00171355
AC015936.3	10.6023	15.5046	0.00178927
GBM_LOC030475	1.09264	1.55492	0.00180415
RP11-355I22.2	1.94687	0.879217	0.00181103
RP11-436K8.1	0.57318	1.05652	0.00181795
RP5-1033H22.2	0.453897	0.751766	0.00182901
RP11-490B18.5	0.761235	0.511518	0.00188295
AC000068.5	1.00746	0.649346	0.00188722
LINC00519	0.595268	0.88247	0.00194057
RP3-460G2.2	0.268283	0.561233	0.00198089
GBM_LOC021874	1.8311	1.06111	0.00206242
Cabili_1481	2.25186	1.32023	0.00214304
Cabili_2748	0.401984	0.617642	0.00217909
GBM_LOC032111	1.54264	1.0144	0.00218911
GBM_LOC028290	0.997987	1.79672	0.00219744
EXTL3-AS1	0.877377	0.592138	0.00224963
Cabili_1386	2.4909	1.5898	0.00228219
RP1-179N16.6	1.4019	0.899714	0.00229957
RP11-552F3.4	1.50681	1.00922	0.00231709
RP4-683L5.1	1.23613	0.624313	0.00237471
RP11-840I19.5	0.696378	1.15086	0.00238928
RP11-75I2.3	3.1777	2.2153	0.00241102
RP11-344B5.2	1.14722	1.88119	0.00244791
RP4-797C5.2	3.90824	6.55086	0.00253214
RP11-566K11.7	1.52608	0.965445	0.00255511
RP4-785G19.5	0.368949	0.554146	0.00267993
U82695.10	1.92504	1.01008	0.00271689
GBM_LOC030373	1.26993	0.787142	0.00271689
LINC00969	28.1538	19.6813	0.0027978
LL22NC03-2H8.5	0.896238	0.491568	0.00282305
CTD-2194A8.2	0.926387	1.37713	0.00288576
LINC00643	8.62079	3.97763	0.00298687
CTD-3064H18.4	1.1692	0.601428	0.00298687
MIAT	8.15685	4.18056	0.00298687
KB-1125A3.11	0.722385	0.505452	0.00304082
RP11-755F10.3	1.78652	1.16317	0.00308403
RP1-232L24.3	1.5455	1.07655	0.00311976
TUNAR	1.50312	0.563674	0.00326978
LINC01411	2.27332	1.14092	0.00329903
RP1-167F1.2	0.540975	0.848105	0.00331146
RP11-326G21.1	9.03775	13.2569	0.00337556
ERVK13-1	5.06816	3.4238	0.00343609
RP11-348F1.2	1.06825	0.751667	0.00350244
RP11-296L22.8	33.4615	20.8237	0.00358273
CTA-373H7.7	7.09482	3.21102	0.00359618
CTD-2547G23.4	1.27927	0.868605	0.00360476
CTA-223H9.9	0.992208	0.603707	0.00366419
DLGAP1-AS2	0.965689	1.48001	0.00391835
RP1-253P7.4	1.73424	1.10285	0.00398263
FLJ35934	0.890119	0.471942	0.00402747
AC005754.7	2.55259	1.04712	0.00403715
RP13-977J11.2	0.453524	0.69513	0.00403715
RP11-455F5.5	0.73833	1.22951	0.00405225
RP11-340F14.6	3.97581	2.6055	0.00406741
LINC01152	1.7117	1.18809	0.0040979
RP11-551L14.4	4.15973	2.70252	0.00418665
LINC01094	10.152	16.7327	0.00430867
RP11-169D4.2	1.24227	0.675392	0.00432475
CTD-3116E22.8	0.492629	1.16505	0.0043409
Cabili_1455	1.43453	0.847467	0.0043571
RP11-95O2.5	4.327	2.3563	0.00436766
CTD-2228K2.7	23.5356	15.2332	0.00442253
AC006129.2	0.449097	0.807585	0.00449477
RP11-715J22.3	2.71097	1.74101	0.00452838
RP11-677M14.7	1.35862	0.930562	0.00458517
CTD-2152M20.2	2.60739	1.741	0.00460196
Cabili_1510	2.37686	1.60183	0.00460196
RP11-64K12.10	0.907093	0.539321	0.00463638
SCARNA9	2.55513	1.77828	0.00482505
ALG1L9P	1.31687	0.917644	0.00487297
RP11-793H13.8	66.6049	46.0829	0.00500815
RP11-394J1.2	0.462459	0.736143	0.00512111
RP11-1049A21.2	0.39031	0.762705	0.00525607
RP11-23N2.4	1.15102	0.764444	0.00527558
GBM_LOC026870	0.253835	0.523819	0.0053148
AQP4-AS1	1.29929	1.9291	0.00537419
CTD-2026K11.5	0.807751	0.527409	0.0054544
RP11-6O2.4	7.39093	14.172	0.00558381
RP11-161M6.2	176.215	123.862	0.0055976
KCNMA1-AS1	1.41202	0.963994	0.0055976
RP11-285F16.1	4.78949	2.81796	0.00561835
RP5-1031D4.3	0.858647	1.23784	0.00563917
RP1-74M1.3	0.317322	0.51951	0.00575148
RP1-159A19.4	0.55648	0.876645	0.00575148
RP11-731J8.2	7.9942	4.39534	0.00575148
RP11-126K1.6	8.70501	6.01161	0.00575873
LGG_LOC013371	0.879259	0.618275	0.00575873
CIRBP-AS1	1.27982	0.903124	0.00575873
LINC00632	5.47635	3.63973	0.00585169
RP11-597M12.1	7.70614	5.3079	0.00600488
RP11-386I14.4	0.963744	1.79764	0.00610161
AC092675.3	0.704987	1.13907	0.00610952
FAM181A-AS1	0.416787	0.77429	0.00610952
RP11-231C18.1	25.3987	14.987	0.00617025
LINC00342	6.12564	4.17338	0.00621603
Cabili_568	0.740579	0.50741	0.00639398
CTC-444N24.8	0.979931	1.55536	0.00644896
RP11-256I23.2	12.188	7.98757	0.00645756
RP11-9G1.3	2.57744	1.65762	0.00645756
CTC-471J1.8	0.426467	0.667813	0.0068297
CTD-2035E11.5	0.833733	0.530434	0.00684685
AP001469.9	2.54856	1.72219	0.00685607
RP11-867G2.8	0.633609	0.930261	0.00691613
AC012309.5	2.4651	4.99651	0.00696724
AC007405.8	0.870515	0.507149	0.00699294
Cabili_2859	4.41025	2.96362	0.00705272
RNU6ATAC35P	1.03784	0.727322	0.00719104
RP11-347I19.8	2.88928	1.86834	0.00739519
RP11-680F20.12	3.9095	2.57031	0.00750451
GBM_LOC036789	0.798439	0.525064	0.00750451
PTPRD-AS1	5.90658	3.63883	0.00764337
RP11-388C12.8	0.912517	0.617309	0.00767144
RP11-181C3.1	1.92938	1.25872	0.00779349
SLC2A1-AS1	0.403885	0.610086	0.00805585
Cabili_2293	0.251708	0.538552	0.00812406
RP11-732A19.5	11.2992	16.312	0.00815383
RP11-309L24.2	0.471163	0.908	0.00817466
AC005754.8	1.41945	0.76764	0.00820462
HP08942	6.60723	4.61874	0.00822561
RN7SL2	268.086	153.751	0.00829516
DGCR5	7.44566	5.23776	0.00871291
KIAA1614-AS1	1.49197	0.998687	0.00894769
RP11-807H17.1	0.556033	0.792115	0.00936161
RP6-65G23.3	1.36391	0.808697	0.00958818
Cabili_2248	0.528897	0.780794	0.00969292
RP11-554A11.9	0.372288	0.578695	0.00969292
RP11-1084A12.2	0.771922	0.540818	0.00979876
DYX1C1-CCPG1	0.958361	1.44576	0.00981326
RP11-21A7A.4	1.4517	1.01062	0.00997764

## Sheet: IDH1
lncRNA	Mutation median FPKM	WT median FPKM	FDR
AC079305.11	1.40582	0.0804156	1.86477e-39
TP73-AS1	2.81954	12.8395	1.98361e-37
RP5-1056H1.2	9.24963	0.720864	1.38357e-35
RP11-54O7.3	2.2388	0.333869	4.7396e-32
SLC25A21-AS1	3.74168	0.699432	4.81215e-32
RP11-195F19.30	0.432078	1.809	1.7474e-31
AC009227.2	6.56884	1.19233	1.01552e-30
LINC00925	35.3999	7.97375	3.71043e-30
LINC00092	0.672399	4.07229	6.83196e-30
CTC-510F12.6	3.44012	8.50267	9.32137e-30
RP11-161M6.2	155.579	39.1352	3.54501e-29
RP11-231C18.1	19.5992	1.7158	9.15072e-29
LGG_LOC030946	1.13531	0.160165	6.44842e-28
RP11-231C18.2	1.20508	0.0998339	7.47424e-28
RP11-159H10.3	1.23721	0.206153	1.28231e-27
RP6-201G10.2	4.78597	1.31528	1.28231e-27
SNHG18	0.503895	4.26857	2.3949e-27
AC010226.4	1.03689	3.11543	2.36265e-26
LINC00152	2.00787	8.76528	5.20655e-26
AC083864.3	1.51464	0.270198	5.46391e-26
ARSD-AS1	1.92715	7.81565	7.40473e-26
RP11-632P5.1	1.1882	0.0864576	1.09293e-25
RP13-270P17.1	1.47852	3.58145	2.89724e-25
GBM_LOC028297	1.61145	0.12271	4.37747e-25
RP13-270P17.3	0.498719	1.30736	1.59923e-24
AC053503.11	4.57686	0.82253	1.69522e-24
GBM_LOC025187	3.44	0.10334	1.69522e-24
RP4-665J23.1	1.40926	6.58616	3.4303e-24
RP11-54O7.16	1.25774	0.210542	5.91039e-24
AC062021.1	7.21309	0.188394	5.99273e-24
AC073283.4	4.4356	1.7556	1.2067e-23
GBM_LOC047199	0.944496	0.174164	2.07225e-23
LGG_LOC027853	1.53707	0.274403	2.46116e-23
RP11-132F7.2	1.16294	0.269179	5.04018e-23
RP11-839D17.3	0.444308	1.54301	6.42121e-23
RP11-464F9.22	1.62346	0.668669	1.40271e-22
GBM_LOC025161	1.5797	0.448995	2.33371e-22
GBM_LOC028295	0.738432	0.102936	2.60936e-22
RP11-305E6.4	1.49628	0.77285	2.82654e-22
CTD-3157E16.2	1.96769	6.64603	4.64342e-22
RP11-161H23.5	9.17436	38.7703	4.64342e-22
AC002398.12	16.8743	69.5797	9.23968e-22
RP11-429B14.4	6.7995	1.97887	1.09731e-21
SBF2-AS1	0.483631	1.2684	1.52736e-21
KIAA1614-AS1	0.885781	1.7616	2.7591e-21
RP11-108L7.4	2.56654	1.33832	3.06136e-21
LL22NC03-N64E9.1	1.63095	0.360703	3.47495e-21
MIR4435-1HG	2.38887	9.5682	3.55873e-21
RP11-359E3.4	0.654543	0.343899	4.14262e-21
RP11-340F14.6	3.1985	1.35387	4.14262e-21
RP11-7I15.3	0.911335	2.17917	6.37799e-21
LHX5-AS1	2.21917	0.0120497	7.15e-21
RP11-73C9.1	2.86481	0.738741	2.42238e-20
FLJ16779	28.5759	8.72159	2.63053e-20
RP11-5C23.1	1.37729	4.80824	6.55265e-20
GBM_LOC005589	0.68741	0.279182	7.82903e-20
CTD-2325P2.4	1.55245	7.09681	9.07365e-20
LRRC75A-AS1	537.662	290.36	1.02911e-19
RP11-303E16.2	1.92197	3.80338	1.05673e-19
RP11-124D2.3	59.3583	33.4071	1.75233e-19
RP11-309L24.2	0.679381	2.91056	2.16533e-19
LINC00960	1.82418	0.450441	2.5627e-19
LINC00689	5.23567	0.334805	2.63311e-19
SNHG1	71.2178	32.5841	2.88553e-19
LINC00844	124.451	42.4846	3.27252e-19
Cabili_1456	5.93371	3.01219	4.30876e-19
CYP17A1-AS1	4.25532	1.43185	9.18853e-19
RP11-182J1.3	4.68797	3.15292	1.02781e-18
GBM_LOC039589	0.566368	0.344201	1.03472e-18
Cabili_1904	0.859138	0.350775	1.13354e-18
RP11-152N13.5	2.04522	1.12639	1.1807e-18
RP11-77K12.4	0.593267	2.13796	1.39543e-18
ZNF32-AS1	38.4175	25.4608	1.5614e-18
RP13-298C8.3	0.574334	1.97646	1.88395e-18
GBM_LOC021874	1.32933	0.305633	2.55438e-18
RP11-1191J2.5	0.480171	1.24381	3.10536e-18
AC097724.3	3.6644	1.4441	3.82131e-18
RP11-21A7A.4	1.17592	0.56252	4.89931e-18
DYNLL1-AS1	2.97816	5.32233	5.66167e-18
CTB-1I21.1	1.12176	0.0933516	6.20011e-18
RP11-279F6.1	2.01023	0.794508	6.99322e-18
CTD-2270P14.5	2.18657	0.80702	6.99322e-18
CTC-458G6.2	1.02093	0.145729	6.99322e-18
RP11-706O15.1	5.02274	1.48625	7.59766e-18
RP11-807H17.1	1.07082	0.165294	9.60991e-18
RP11-401P9.4	14.8779	6.03674	9.81653e-18
RP11-119F7.5	2.15414	1.22242	9.90613e-18
CTD-3157E16.1	1.27166	4.43252	9.9978e-18
CRNDE	1.4004	9.31585	1.11941e-17
AC009501.4	4.49327	7.22047	1.11941e-17
RP11-265D17.2	0.684815	1.57476	1.13944e-17
RP3-518E13.2	22.223	8.01028	1.16471e-17
LEF1-AS1	0.525953	1.23895	1.17613e-17
RP11-609D21.3	2.47294	6.32908	1.79364e-17
RP11-269C23.5	2.35807	1.10132	1.84868e-17
RP11-182J1.17	1.53544	0.954601	2.31586e-17
RP11-398C13.6	1.60072	0.804561	3.66534e-17
RP11-5C23.2	0.464591	1.02811	3.82367e-17
AC093673.5	6.8526	13.2989	4.35877e-17
RP3-466P17.1	1.48117	0.614295	5.02833e-17
RP5-1177M21.1	3.7917	0.500691	5.08008e-17
RP11-315E17.1	0.85971	0.273416	6.22291e-17
RP11-728F11.4	1.84354	0.483361	6.9498e-17
PAXIP1OS	1.12752	2.87695	6.96674e-17
RP11-391M1.4	7.93444	5.04715	7.62655e-17
LINC01287	2.56572	1.08779	7.86324e-17
RP11-304L19.12	1.50586	0.644632	1.65607e-16
RP11-1102P16.1	1.18328	0.310467	2.54308e-16
GAS5	205.844	120.574	2.78058e-16
RP11-220C2.1	2.38374	0.682183	3.04015e-16
RP1-266L20.2	2.23122	1.08565	3.36313e-16
AC000068.10	1.26673	0.593468	3.9451e-16
DNMBP-AS1	1.31444	0.446723	3.99727e-16
LINC00863	1.88149	1.0536	3.99727e-16
WDR11-AS1	2.41012	0.947333	3.99727e-16
CTD-3064H18.4	0.780277	0.21289	4.12142e-16
RP11-545E17.3	0.719178	1.44424	5.02608e-16
HOTAIRM1	0.56251	3.65057	5.14205e-16
MAPT-AS1	5.84329	2.26313	5.30214e-16
TPTEP1	12.3644	1.59404	6.31371e-16
RP11-441O15.3	0.668121	0.382665	6.71586e-16
RP11-521C22.2	0.564546	0.310394	7.14366e-16
AP001469.9	2.00319	1.04967	7.36671e-16
CTB-193M12.5	1.84197	4.37718	8.23941e-16
CTD-2132N18.4	2.7171	1.58498	8.23941e-16
RP11-513M16.7	4.70974	2.18516	9.00506e-16
RP11-38L15.2	3.07896	1.88402	1.23073e-15
LINC00237	9.28235	3.38155	1.30884e-15
LINC01503	2.65477	6.03945	1.39191e-15
LINC00632	4.21722	1.78053	1.61063e-15
RP11-182J23.1	1.65061	0.445078	2.15462e-15
Cabili_1927	1.17403	0.567489	2.16319e-15
DICER1-AS1	11.0129	5.90577	2.27372e-15
SNHG6	180.752	118.651	3.21596e-15
RP11-823E8.3	2.08779	5.38908	3.31605e-15
EPB41L4A-AS1	63.9015	37.707	3.45851e-15
LINC00519	1.00751	0.349618	3.84722e-15
ZFAS1	177.75	116.073	4.49468e-15
RP11-46C24.7	4.43382	3.03123	5.7682e-15
JMJD1C-AS1	1.51971	0.616989	7.34101e-15
AC147651.4	0.493299	1.18513	8.15794e-15
CTD-2341M24.1	0.906301	2.44502	1.03764e-14
EPHA5-AS1	0.524384	3.06321	1.27939e-14
DANCR	79.3949	50.4906	1.35873e-14
RP11-59C5.3	0.83225	0.433414	1.50877e-14
CTD-2595P9.4	1.03122	0.431629	1.60222e-14
AC002429.5	1.67582	0.546264	1.74616e-14
MRPL23-AS1	0.736177	0.292128	1.90289e-14
LINC00693	9.79077	4.95014	1.94717e-14
LGG_LOC036929	1.37373	0.359698	2.08294e-14
RP11-317J10.2	1.2325	3.03399	2.18733e-14
CTC-548K16.5	0.937344	2.57951	2.19743e-14
RP11-158M2.5	1.09056	0.390653	2.62542e-14
RP11-177H2.2	0.639691	0.27619	3.38668e-14
CTD-2033A16.1	1.43775	2.55332	3.39002e-14
RP11-196G18.24	6.12149	3.32787	3.43106e-14
CTD-2561B21.11	1.0295	0.439335	3.96227e-14
RP11-758H9.2	5.39902	3.2913	4.0844e-14
RP11-401P9.5	1.24695	0.45154	4.44763e-14
RP11-83N9.6	0.717234	0.382787	4.58477e-14
RP11-624M8.1	5.68347	1.90593	4.99203e-14
GBM_LOC049497	0.780883	0.453276	5.05306e-14
RP11-116N8.1	3.9013	1.65431	6.27115e-14
GBM_LOC037116	0.942495	0.464354	6.34787e-14
LINC00609	0.591152	0.247975	6.90955e-14
ZBTB20-AS4	0.869514	0.308787	7.12235e-14
RP11-68I18.10	0.729859	0.369464	8.36389e-14
GBM_LOC040061	0.439843	2.85788	9.2672e-14
RP11-25K19.1	9.68305	5.50454	9.38117e-14
LINC00672	11.0826	4.52835	1.10892e-13
RP11-351D16.3	0.704843	0.387693	1.5125e-13
RP11-134G8.10	2.25242	4.76933	1.66247e-13
TPT1-AS1	13.7984	9.65239	1.71323e-13
RP11-21A7A.3	10.9943	6.1122	1.7846e-13
RP11-44N11.2	1.20107	0.686621	1.83913e-13
RP11-359B12.2	3.81222	2.25657	1.89535e-13
CTD-3138B18.5	1.38166	1.96547	1.91877e-13
RP11-1055B8.3	4.9287	2.1178	2.04928e-13
RP11-357K6.1	2.76969	0.732656	2.21208e-13
XXbac-BPGBPG55C20.2	1.18135	0.642183	2.62809e-13
RP11-395B7.7	6.70657	11.0536	2.6418e-13
AP003068.9	63.7034	43.14	2.97486e-13
RP11-46H11.3	0.61008	0.274582	3.54415e-13
LINC00928	1.64007	0.452227	3.5502e-13
PRMT5-AS1	15.0075	9.78238	3.89829e-13
AC068831.6	3.92681	5.66171	3.94667e-13
RP11-4B14.3	1.28858	0.409755	4.56807e-13
ZEB1-AS1	9.83694	6.79911	5.32282e-13
RP1-63G5.8	10.7791	2.93848	5.35115e-13
RP11-725P16.2	1.80553	0.707151	5.36092e-13
RP11-549L6.3	1.26097	0.648728	5.38972e-13
RP11-326I19.2	1.11601	0.739618	5.92638e-13
Cabili_1242	2.2099	1.04873	5.92638e-13
RP11-182L21.6	3.64113	2.29992	6.50345e-13
Cabili_782	0.766544	0.428398	6.63095e-13
RP11-258C19.7	5.48426	3.32053	6.9043e-13
AC005786.7	11.1807	16.4361	7.98195e-13
RP11-464F9.20	0.959022	0.519605	8.81691e-13
GBM_LOC028290	2.31453	0.661958	8.83452e-13
LINC01057	1.3437	3.72956	9.45695e-13
RP11-196G18.22	2.47462	1.36062	1.10014e-12
MIR4697HG	14.9381	7.71883	1.12555e-12
AC008440.5	8.44385	15.8814	1.15957e-12
AC016738.4	0.67255	1.21423	1.21547e-12
RP11-259K15.2	4.26683	1.49166	1.2619e-12
Cabili_2898	1.74103	0.931384	1.2619e-12
XXbac-B444P24.13	2.46712	1.31955	1.2619e-12
RP11-143K11.5	1.0902	0.255237	1.26901e-12
CTD-2653D5.1	0.643005	0.241854	1.28504e-12
AC012507.3	0.423864	1.40158	1.52138e-12
SOCS2-AS1	0.665768	1.36239	1.52138e-12
RP5-1024C24.1	0.434354	1.03587	1.5674e-12
FLJ42627	3.58247	2.37122	1.58727e-12
CTD-2017C7.1	1.53295	0.959813	1.74374e-12
RP11-881M11.4	4.59391	6.53026	1.74374e-12
DGCR9	2.78322	1.10663	1.84652e-12
RP11-342M1.3	1.7126	2.93904	1.86999e-12
RP11-801F7.1	3.89834	5.88094	1.99377e-12
RP11-120J1.1	8.12435	4.46103	2.05403e-12
RP11-47I22.1	4.17827	0.75627	2.08019e-12
CTB-51J22.1	1.13518	2.48813	2.09234e-12
RP11-299G20.2	0.755369	0.351124	2.23068e-12
LINC01159	0.916819	1.65184	2.57235e-12
RP11-182J1.1	1.88763	1.29111	2.57861e-12
RP11-973D8.5	0.979623	0.527624	2.70212e-12
RP11-156L14.1	0.592781	1.40097	2.71803e-12
AC104655.3	2.1013	0.908036	2.75278e-12
AC017116.11	6.80999	14.6095	2.96424e-12
CTB-129P6.4	0.694155	1.06492	3.1593e-12
RP11-508N22.13	1.31515	0.594682	3.19973e-12
GBM_LOC004789	2.01728	0.983939	3.46844e-12
RP11-443B20.1	0.55646	0.957927	3.48909e-12
RP11-15I11.3	0.708592	0.249246	3.68058e-12
RP11-286H14.8	5.03076	7.89588	3.8693e-12
RP11-360L9.7	0.921524	1.77636	4.05383e-12
RP11-343J3.2	1.54088	0.452204	4.17584e-12
RP11-809O17.1	0.500725	0.859386	4.3307e-12
RPARP-AS1	7.80924	5.08007	4.35675e-12
ALDH1L1-AS2	1.36229	4.13537	4.64201e-12
XXbac-B461K10.4	11.9461	7.20273	5.02971e-12
RP11-87C12.5	3.70508	2.13278	5.23345e-12
RP11-348N5.9	0.831197	0.539758	5.48213e-12
RP11-386G11.10	398.945	645.44	5.74248e-12
TMEM254-AS1	2.68334	1.65802	6.07595e-12
SNORA72	6.13701	3.85597	6.3641e-12
C10orf85	2.75324	1.30049	6.5549e-12
LINC01089	16.8572	9.44338	6.63917e-12
RP11-839G9.1	1.19294	0.384065	7.26316e-12
LGG_LOC021000	1.77127	0.864846	7.73507e-12
RP11-395I6.3	2.42489	1.53505	7.83449e-12
DKFZp434J0226	0.962263	0.180197	8.34298e-12
RP11-1134I14.8	3.61482	2.23866	8.97324e-12
SNHG11	8.59605	13.6314	9.14935e-12
RP11-38P22.2	2.77343	9.40812	9.67709e-12
RP11-513M16.8	5.61166	3.51031	9.96599e-12
ZNF571-AS1	3.5419	1.79034	1.01954e-11
PWAR6	14.6168	7.76929	1.03266e-11
AC002310.12	1.90669	1.29848	1.04597e-11
RP11-463C8.7	0.645842	0.249971	1.08799e-11
RP11-18J9.3	0.639756	0.251422	1.12792e-11
RP11-278A23.4	1.00697	0.468074	1.13491e-11
RP11-4L24.3	1.74439	1.026	1.18833e-11
MIR22HG	3.14716	6.15706	1.19917e-11
IGFBP7-AS1	11.571	21.9467	1.19917e-11
AC005339.2	6.13395	10.2115	1.23497e-11
SNHG19	93.8039	44.8047	1.3815e-11
RP11-277P12.20	0.724515	0.307882	1.46075e-11
RP11-762H8.4	5.8114	14.7054	1.63352e-11
ACVR2B-AS1	0.668818	0.425616	1.72696e-11
RP11-714G18.1	0.669493	0.324044	1.86816e-11
AC002398.13	2.32931	3.5542	1.89222e-11
MIR219A2	8.37185	2.95669	2.06694e-11
RP11-474G23.3	0.806669	0.451654	2.19907e-11
LINC00641	16.2425	10.5651	2.24936e-11
RP11-2E11.5	1.26405	0.555376	2.25602e-11
RP11-258F1.2	1.85967	3.19582	2.60445e-11
RP11-214N9.1	1.85165	1.09891	2.86131e-11
RP11-799B12.1	1.82302	3.08521	3.04322e-11
TMCC1-AS1	3.49058	2.07222	3.21549e-11
FAM181A-AS1	0.545102	2.37474	3.25675e-11
CTD-2521M24.9	1.00632	2.28472	3.29856e-11
RP3-523E19.2	0.895374	0.493573	3.39567e-11
RP11-574K11.24	4.20446	2.69534	3.51839e-11
RP11-299G20.5	2.09798	0.878982	3.71714e-11
RP11-553L6.5	66.7633	43.0288	3.76488e-11
RP11-323P17.2	1.11339	0.495409	4.10824e-11
RP1-167F1.2	0.947892	0.455603	4.16097e-11
LL22NC03-2H8.5	0.600209	0.285144	4.2144e-11
RP4-669P10.16	2.66968	1.58878	4.38042e-11
GBM_LOC026050	0.694542	0.451322	4.50897e-11
AL450992.2	0.430206	1.47458	4.56691e-11
AC068057.1	0.998146	3.73427	5.12864e-11
CTD-3128G10.6	1.11414	1.96776	5.29582e-11
GBM_LOC005796	0.783039	0.35357	5.36378e-11
RP11-1081L13.4	2.6646	1.73902	5.96301e-11
RP11-849H4.4	28.8121	18.5576	6.03949e-11
RP11-23E10.3	0.610575	0.3231	7.08798e-11
RP11-139J15.2	2.22079	1.34678	7.41223e-11
RP11-403A3.3	4.49151	13.1651	7.45933e-11
BAALC-AS1	5.934	11.8734	8.39477e-11
CTD-2380F24.1	2.47251	0.943391	8.42117e-11
Cabili_1038	2.21521	1.39667	8.8899e-11
GBM_LOC006520	0.815266	0.184335	9.00364e-11
RP3-466P17.2	2.5992	1.27363	9.03215e-11
RP11-316M1.12	59.9395	90.2585	9.08974e-11
TRAF3IP2-AS1	35.7697	24.5619	1.07241e-10
H19	0.436153	2.05117	1.2021e-10
RP11-338N10.1	0.615869	0.310079	1.31351e-10
RP4-612B15.3	1.01493	1.50001	1.37296e-10
RP11-218C14.8	2.37287	4.73072	1.3817e-10
NOVA1-AS1	1.73709	0.609729	1.40818e-10
CTD-3193K9.11	1.98381	1.00192	1.45806e-10
CTD-2517O10.6	0.509545	0.858179	1.45806e-10
RP11-138I1.4	310.222	496.464	1.48601e-10
Cabili_2084	34.7914	19.7727	1.55805e-10
AC000068.9	3.3809	2.1636	1.58304e-10
AC021224.1	11.6405	7.78019	1.59838e-10
RP11-74E22.8	7.14165	2.80151	1.61881e-10
RP11-238F2.1	1.29809	0.60168	1.68128e-10
RP11-517A5.4	1.04745	0.564467	1.84186e-10
CTD-2545M3.8	3.35075	1.45844	1.89486e-10
RP11-706J10.2	1.49426	4.53355	1.96777e-10
AC000068.5	0.740713	0.409642	1.99288e-10
RP11-720L2.4	0.489429	0.937543	2.11535e-10
RP11-455O6.9	0.727205	0.334935	2.21038e-10
RP11-771K4.3	0.814998	0.468457	2.48149e-10
AC002456.2	2.06977	4.50924	2.56893e-10
RP11-124N14.3	57.0485	172.086	2.57741e-10
RP1-293L6.1	2.22717	0.266727	2.63472e-10
RP13-726E6.2	1.23601	0.637713	2.66826e-10
RP11-414H17.5	0.596502	0.294119	2.92073e-10
RP11-999E24.3	17.8574	11.6032	3.05116e-10
RP1-179N16.6	1.04445	0.536658	3.07081e-10
LINC00599	5.0396	1.57178	3.20784e-10
RP11-144G6.4	1.03942	0.591376	3.2688e-10
RP11-295G20.2	1.55918	2.50595	3.8651e-10
RP11-210M15.2	7.2763	4.5516	3.8651e-10
RP11-20B24.4	9.01719	12.8695	4.19003e-10
PPP3CB-AS1	16.434	9.52364	4.24307e-10
CTC-425F1.4	336.868	489.036	4.41875e-10
RP11-75I2.3	2.5539	1.17665	4.41875e-10
INTS6-AS1	4.38896	2.89448	4.47471e-10
FOXD3-AS1	0.834639	3.3656	4.53139e-10
CTD-2530N21.4	2.00391	1.31766	4.80545e-10
RP11-499P20.2	2.107	1.23155	5.14288e-10
PRRT3-AS1	1.44131	2.07278	5.2079e-10
RP1-178F15.5	1.56916	2.36138	5.35527e-10
UBAC2-AS1	1.02306	0.669858	5.42298e-10
RP3-337O18.9	5.54967	8.06569	5.49156e-10
RP13-514E23.1	4.99592	3.39807	5.56103e-10
RP11-1182P23.5	0.812851	0.432838	5.63139e-10
RP1-63G5.5	0.830241	0.324609	6.02559e-10
GPR123-AS1	1.70195	0.696634	6.19573e-10
CTD-2620I22.7	2.4268	3.70181	6.27403e-10
GBM_LOC004742	0.594844	0.344551	6.33617e-10
RP11-119F19.5	1.82293	1.05389	6.61521e-10
RP11-626G11.3	6.14982	9.53413	6.76043e-10
GBM_LOC042831	1.33685	0.566553	7.16613e-10
RP11-359E10.1	2.14672	4.98395	7.48095e-10
Cabili_1858	4.10796	1.7778	7.52942e-10
RP11-680F20.12	3.02579	1.52894	7.67102e-10
RP11-23P13.6	0.541173	0.990864	8.08094e-10
ERICH6-AS1	1.55499	2.52893	8.26435e-10
RP1-317E23.3	15.9531	23.8557	8.26435e-10
Cabili_1493	11.1733	4.16507	8.29286e-10
RP11-278A23.1	0.764917	0.514405	8.84566e-10
AP000255.6	0.91632	0.504937	8.95733e-10
Cabili_1318	0.885084	0.304236	9.07043e-10
RP11-690D19.3	1.02408	0.0133029	9.36165e-10
RP11-158M2.4	1.29817	0.53358	9.36165e-10
RP11-1191J2.2	0.654293	2.03069	9.62444e-10
RP11-334A14.5	6.13938	3.16431	9.65801e-10
RP11-227B21.2	5.7347	1.59125	1.03941e-09
CTD-2132N18.2	2.14184	1.33646	1.05254e-09
CTD-3092A11.2	1.54743	2.88309	1.05622e-09
RP11-981G7.6	2.97942	1.60476	1.06956e-09
LINC01088	76.7963	23.9271	1.14347e-09
RP11-358L22.3	1.87841	1.24055	1.17546e-09
RP11-676J15.1	2.7564	1.26398	1.23776e-09
AC016757.3	0.680993	1.87618	1.33098e-09
RP11-517I3.2	21.8218	14.4886	1.38878e-09
RP11-396C23.2	0.477819	0.937396	1.40624e-09
RP5-1021I20.1	4.62568	2.71902	1.52549e-09
RP11-93H12.4	1.19382	0.795201	1.61551e-09
ZNF32-AS2	1.50781	0.898854	1.75207e-09
RP11-818F20.5	1.01334	0.690814	1.7582e-09
RP11-54O7.17	1.75425	0.729938	1.96414e-09
RP11-403A3.2	0.918577	3.26104	2.06707e-09
PARD3-AS1	1.27334	0.610694	2.14547e-09
RP11-44N11.3	1.14575	0.660227	2.14547e-09
RP5-1007F24.1	2.97631	1.38152	2.3338e-09
RP11-435O5.5	0.543874	0.350725	2.44381e-09
RP11-1C8.7	1.45281	0.323553	2.44381e-09
RP11-254F7.2	0.837265	1.3464	2.58655e-09
RP11-731C17.2	1.51647	0.979225	2.75517e-09
RP11-338K17.8	6.16304	9.02487	2.75517e-09
RP11-876N24.3	0.538728	1.0535	3.20559e-09
CTD-3035K23.7	0.533735	1.08994	3.20559e-09
RP11-498P14.5	0.539304	0.354176	3.2645e-09
RP11-284F21.7	180.03	92.688	3.43368e-09
RP11-318E3.9	1.31778	0.894132	3.46803e-09
RP11-446F17.3	1.07265	0.657942	3.46803e-09
RP1-261D10.2	0.726385	1.0798	3.51103e-09
RP11-347I19.7	1.25415	0.751502	3.55456e-09
FAM222A-AS1	1.85271	1.05022	3.59864e-09
RP11-61K9.3	2.10616	2.98306	3.62632e-09
HAR1B	0.583294	0.171905	3.62632e-09
HAR1A	1.2431	0.418583	3.64142e-09
HHIP-AS1	0.707253	1.27992	3.64142e-09
RP11-420A23.1	0.610043	0.347138	3.90904e-09
RP11-342M3.5	27.8868	18.8705	4.05122e-09
CTD-3193O13.11	23.9265	12.7699	4.22306e-09
PDCD4-AS1	3.02065	1.95506	4.29056e-09
LGG_LOC043542	0.860165	0.51797	4.29056e-09
RP11-258F22.1	0.654465	0.369758	4.31843e-09
RP13-650J16.1	2.78686	1.56956	4.43619e-09
LA16c-380H5.5	2.04924	1.19448	4.48095e-09
GLYCTK-AS1	3.29513	1.92559	4.48095e-09
RP11-452L6.1	2.93479	2.04384	4.60308e-09
RP11-98D18.9	2.78039	1.69055	4.89981e-09
ITGA9-AS1	5.55117	8.02657	4.89981e-09
RP11-341N2.1	1.27836	0.674424	5.16998e-09
RNF139-AS1	1.002	0.65841	5.31048e-09
AF131216.5	4.63333	2.04887	5.53445e-09
AL161668.5	2.55152	1.32714	5.86374e-09
RP3-525N10.2	18.8318	11.3346	5.86374e-09
LINC00906	0.739888	0.245897	5.86374e-09
Cabili_2300	1.51165	0.856269	5.92307e-09
MANEA-AS1	0.604697	0.364612	5.92307e-09
LINC00893	0.511567	1.02781	5.99624e-09
RP11-103H7.5	7.73742	3.75835	6.62035e-09
GBM_LOC039272	0.733811	0.391085	6.70194e-09
ZNRD1-AS1	2.22583	1.54338	7.44552e-09
TBX2-AS1	9.40402	4.60675	7.75715e-09
RP11-394B2.1	135.245	94.1306	7.79052e-09
RP11-1000B6.3	0.62371	1.19933	7.79052e-09
TOB1-AS1	2.45038	1.62154	7.88629e-09
RNF219-AS1	6.81963	2.97585	7.91468e-09
MIR3911	3.6684	2.19889	7.94897e-09
RP11-81A22.4	3.77949	2.55416	7.94897e-09
C21orf49	2.35033	1.5486	8.04677e-09
ARHGAP31-AS1	0.864	0.539475	8.38308e-09
FAM85A	1.25242	2.08383	8.55949e-09
RP11-373N22.3	0.682188	0.469475	9.83557e-09
AC011524.1	1.03327	0.345852	1.04593e-08
DUXAP8	6.20326	3.297	1.08707e-08
ZNF503-AS2	1.22785	1.79642	1.10037e-08
LBX2-AS1	0.466998	0.784379	1.12339e-08
RP11-973D8.4	1.26287	2.22171	1.18426e-08
Cabili_2025	0.722255	0.454556	1.18426e-08
CTB-129O4.1	2.03369	1.22085	1.20557e-08
TMEM246-AS1	1.57289	0.980139	1.27706e-08
RP4-797C5.2	6.93608	4.15389	1.3e-08
RP11-457M11.5	1.48536	0.922381	1.37021e-08
RP5-1119A7.17	3.22527	0.684069	1.44752e-08
RP11-452L6.7	2.31993	1.54157	1.44752e-08
GBM_LOC025701	1.70491	0.914321	1.52553e-08
CTD-2538C1.2	1.52021	2.25829	1.54097e-08
LINC00938	3.45273	2.36931	1.60116e-08
RP11-362K14.7	1.98113	3.49954	1.65098e-08
RP11-334C17.5	1.84723	1.10543	1.79301e-08
LINC01114	1.60245	2.52295	1.8046e-08
ZNF350-AS1	2.74152	1.40439	2.03967e-08
RP11-16P6.1	1.81614	1.14242	2.14098e-08
RP11-362J17.1	0.634034	0.393309	2.19308e-08
RP11-535M15.1	0.669171	1.3667	2.2196e-08
RP1-65J11.1	0.891915	1.42164	2.42455e-08
GS1-358P8.4	2.48309	3.67333	2.43334e-08
CTD-2325A15.5	0.925625	1.98819	2.44421e-08
RP11-385G16.1	2.25496	1.11745	2.44421e-08
RP11-849N15.3	0.621587	0.94562	2.50847e-08
RP11-266K4.14	5.9623	3.84175	2.53874e-08
RP11-77H9.5	14.2459	21.312	2.62731e-08
RP11-71N10.1	2.17296	4.30789	2.69105e-08
CTD-2555K7.2	1.17526	0.751639	2.69105e-08
Cabili_986	0.571717	0.958295	2.72289e-08
RP11-930P14.1	0.900842	0.485925	2.72289e-08
RP11-84C13.2	0.747394	0.443258	2.72289e-08
RP11-192H23.5	614.192	329.057	2.74045e-08
RP11-290L1.3	78.0534	38.1058	2.77351e-08
RNF157-AS1	6.10504	3.67873	2.80697e-08
SCARNA9	2.06764	1.19445	2.84083e-08
RP11-328J6.1	2.10674	0.931532	2.85122e-08
GBM_LOC004609	0.59381	0.362077	3.14486e-08
RP11-290L1.2	0.62083	0.333631	3.2271e-08
EPB41L4A-AS2	0.562979	0.868922	3.23888e-08
GTSE1-AS1	1.41325	0.821888	3.24746e-08
KB-1460A1.5	4.33399	2.85857	3.24746e-08
RP1-198K11.5	0.616443	0.920097	3.28037e-08
AC010761.6	0.913015	1.31167	3.28037e-08
RP5-906C1.1	0.970713	1.68298	3.33204e-08
CTD-2649C14.2	0.959054	0.586967	3.33204e-08
LINC00173	2.00386	1.12559	3.35355e-08
RP11-27M24.1	2.01726	3.21477	3.39391e-08
RP11-517A5.5	1.07842	0.658567	3.53101e-08
RP11-797D24.4	5.94816	3.6122	3.58988e-08
RP11-567M16.6	5.90911	4.01733	3.58988e-08
RP11-38L15.3	4.25225	2.13899	3.58988e-08
LINC00235	0.617337	0.414802	3.94634e-08
RP11-809C9.2	0.778492	0.346954	3.97176e-08
AC093620.5	1.4501	0.747258	4.12397e-08
RP11-265E18.1	2.18466	1.34211	4.40113e-08
GBM_LOC016701	0.583113	0.284913	4.45382e-08
XLOC_078028	1.15891	0.732354	4.50714e-08
RP11-798M19.3	3.52162	4.99834	4.62406e-08
RP11-615I2.2	1.76987	0.656726	4.65379e-08
RP11-250B2.5	0.769362	0.464148	4.66245e-08
LGG_LOC020514	0.570716	0.372137	4.84054e-08
RP11-543C4.1	0.769187	0.491637	4.87169e-08
RP3-402G11.27	1.03555	0.65429	4.88088e-08
LGG_LOC046950	0.693178	0.328619	4.88088e-08
RP11-47A8.5	2.13676	1.49112	5.11805e-08
SERHL	2.53539	1.40287	5.17921e-08
GBM_LOC032111	1.22768	0.532423	5.46021e-08
RP11-638I2.4	0.918634	0.510611	5.59128e-08
RP3-406P24.5	0.600226	0.303655	5.62721e-08
AC010649.1	10.266	5.63642	5.96991e-08
AC113189.5	16.8072	11.6562	6.2076e-08
LINC00463	0.919327	0.45545	6.28148e-08
RP11-95P2.1	1.4448	0.993389	6.34508e-08
RP11-179A16.1	0.640068	0.322798	6.34508e-08
RP11-111M22.4	2.18702	1.46504	6.50837e-08
CTC-241F20.3	0.854872	1.27427	7.03546e-08
SNORD64	1.25091	0.719132	7.03546e-08
RP11-506K6.4	0.642842	0.423123	7.11898e-08
RP11-707G14.7	0.727375	0.514011	7.16457e-08
Cabili_1919	0.770622	1.35685	7.94153e-08
CTA-223H9.9	0.699686	0.311679	8.03555e-08
Cabili_134	2.29365	0.989479	8.11668e-08
WWTR1-AS1	1.7287	3.60353	8.50572e-08
RP11-326C3.7	2.66833	1.48093	8.52239e-08
RALY-AS1	0.831305	1.19447	8.86969e-08
Cabili_2499	0.763175	1.61372	8.97457e-08
RP11-212P7.2	5.0016	3.4107	9.15422e-08
RP11-394J1.2	0.635373	1.11199	9.26241e-08
SLC16A1-AS1	0.576207	0.829409	9.62694e-08
RP11-618M23.5	0.57305	0.335438	1.00592e-07
RP11-16N11.2	1.63043	1.05547	1.10586e-07
RP11-73E17.2	2.24375	1.56076	1.14724e-07
AC015933.2	2.18371	3.50752	1.15878e-07
AC003102.3	0.645162	0.362838	1.15878e-07
CXorf24	2.95144	2.06211	1.1724e-07
CTD-3113P16.10	1.70863	2.54126	1.22598e-07
RP1-74M1.3	0.456935	0.88043	1.27386e-07
RP11-83A24.2	0.867613	1.26057	1.27854e-07
RP11-767C1.2	0.90039	0.602526	1.30175e-07
Cabili_1219	1.03028	0.641147	1.38436e-07
MIR124-2HG	2.09816	0.885168	1.41177e-07
RP11-93H24.3	1.61547	1.04829	1.44795e-07
GBM_LOC014495	3.80994	1.98171	1.44795e-07
RP11-285J16.1	0.921667	0.522818	1.46489e-07
RP11-420L9.5	2.45866	3.93047	1.49386e-07
GBM_LOC039777	0.779052	0.50331	1.53961e-07
RP11-441F2.5	2.8673	1.52488	1.58835e-07
GBM_LOC031174	0.66522	0.433811	1.61969e-07
WDR86-AS1	0.707519	0.363108	1.63859e-07
RP11-94I2.4	0.672957	0.346722	1.67975e-07
GBM_LOC026352	0.52295	0.779315	1.72191e-07
RP11-1008C21.2	0.832549	1.32132	1.72825e-07
SNHG8	99.6071	69.3302	1.73919e-07
AC006115.3	1.18464	1.679	1.7941e-07
RP11-307C19.2	1.23694	0.69014	1.81499e-07
RP11-46J23.1	1.65371	1.08904	1.8851e-07
RP11-118K6.3	2.16519	1.24516	1.90703e-07
RP11-815I9.4	0.959612	0.664129	1.95474e-07
RP11-334C17.3	0.903548	0.607011	1.99729e-07
RP11-638I2.8	1.68417	2.42188	2.0205e-07
LINC01311	0.741731	0.434553	2.04397e-07
RP11-680F20.11	1.00266	0.503295	2.10825e-07
CTC-255N20.1	0.776717	0.409282	2.23693e-07
LINC00957	0.807495	1.69649	2.27473e-07
CTC-490E21.11	1.19037	0.806567	2.35838e-07
GBM_LOC045448	0.873218	0.237368	2.40074e-07
RP11-482H16.1	1.78581	1.00136	2.41216e-07
MIR181A2HG	1.14078	0.67796	2.41216e-07
LAMA5-AS1	1.68009	0.931623	2.44009e-07
RP11-323F24.3	0.788619	0.491316	2.51382e-07
RP5-1198O20.4	7.76739	5.15562	2.56286e-07
RP11-402D21.2	4.26271	2.77911	2.71272e-07
XXbac-BPGBPG55C20.1	0.662938	0.37125	2.74994e-07
RP11-247A12.2	0.823337	0.55438	3.06075e-07
RP11-179B2.2	0.572968	0.404616	3.1316e-07
GS1-114I9.1	2.81602	4.23216	3.15126e-07
RBFADN	1.02604	0.708458	3.16285e-07
RP11-768F21.1	0.670613	0.998376	3.37499e-07
FAM13A-AS1	0.562106	0.380568	3.41376e-07
CTD-2292P10.4	1.1481	0.694581	3.47463e-07
RP11-296L22.8	23.3884	14.3494	3.47463e-07
LINC01137	1.28693	1.92264	3.48742e-07
PVRL3-AS1	0.935056	0.625709	3.50411e-07
RP5-984P4.6	2.07663	1.159	3.51183e-07
AC004540.4	38.9971	21.6769	3.51183e-07
RP11-69M1.6	1.07106	0.746969	3.5339e-07
AC016700.5	3.91535	2.63789	3.57448e-07
HCP5	2.04726	3.51896	3.66241e-07
RP11-482M8.3	0.679519	0.372699	3.78153e-07
AC015936.3	12.8681	26.3407	3.79547e-07
RP11-98D18.1	2.90557	1.20923	4.00906e-07
RP11-981G7.2	1.069	0.597528	4.05496e-07
GBM_LOC025565	0.681549	0.448397	4.42932e-07
AGAP2-AS1	6.58439	10.6996	4.531e-07
CTD-2020K17.4	1.28424	1.98523	4.531e-07
RP11-147L13.14	0.646165	0.409539	4.58269e-07
RP3-462E2.3	0.748911	0.404252	4.60465e-07
RP1-111C20.4	1.29827	0.881586	4.60465e-07
DLG5-AS1	1.88017	1.30181	4.83218e-07
WDFY3-AS2	8.52542	5.22578	4.83218e-07
AC007405.8	0.601559	0.30399	5.11689e-07
RP11-21A7A.2	6.63587	4.26119	5.13565e-07
RP11-585P4.6	1.20237	0.83718	5.19405e-07
RP11-713C5.1	1.46797	0.736718	5.21893e-07
RP11-160O5.1	1.63505	2.63592	5.23809e-07
RP11-133F8.2	2.40644	1.12584	5.48812e-07
RP5-855D21.1	0.684343	0.413347	5.585e-07
RP3-333H23.9	3.12818	2.0376	5.92583e-07
LINC00856	0.626127	1.08846	5.92583e-07
RP11-656D10.3	0.994181	0.607696	6.33475e-07
RP11-144G6.12	2.37241	1.49474	6.33475e-07
RP11-379L18.1	2.51256	1.67771	6.61128e-07
CH17-140K24.6	2.02607	0.92459	6.66911e-07
ID2-AS1	3.74641	2.53401	6.95978e-07
MCF2L-AS1	0.801557	1.26152	7.18177e-07
RP11-658F2.8	4.9767	3.39087	7.26273e-07
AC074212.5	2.4025	3.77182	7.30767e-07
GLIDR	3.25295	2.19951	7.41704e-07
RAMP2-AS1	2.76721	1.5788	7.547e-07
MYCNOS	1.6301	1.05469	7.72859e-07
AC092171.2	0.739734	0.474383	7.81557e-07
PRC1-AS1	2.55264	4.06354	8.00342e-07
CTD-2547G23.4	1.01975	0.630272	8.09341e-07
LINC00263	5.9498	3.78914	8.18439e-07
RP11-229P13.23	20.6632	10.3633	8.26503e-07
RP11-169D4.2	0.777222	0.360202	8.62297e-07
GBM_LOC025944	0.643217	0.408478	8.62297e-07
AC004623.3	3.00538	1.82659	8.76353e-07
LINC00511	47.8081	31.5991	9.04104e-07
GBM_LOC006952	0.885348	0.606691	9.36105e-07
LINC00310	1.28659	0.694712	9.39518e-07
AC068831.10	0.736066	0.494677	9.57181e-07
LINC01024	1.52344	1.07563	1.02364e-06
RP11-111M22.5	0.557057	0.314422	1.12211e-06
HIPK1-AS1	0.574337	0.383189	1.17763e-06
ST7-AS1	3.03064	2.09083	1.18912e-06
RP3-368A4.6	0.94236	0.611135	1.25404e-06
LA16c-380A1.1	1.46549	1.02697	1.2617e-06
RP11-98D18.17	1.10919	0.705161	1.30118e-06
RP11-597D13.9	1.65484	2.88289	1.30589e-06
CTD-3110H11.1	1.15678	0.646804	1.31385e-06
CACNA1C-AS2	0.801316	0.54523	1.36162e-06
LINC01023	3.34295	5.40639	1.37303e-06
RP11-679B19.1	0.573677	0.988363	1.378e-06
PSMB8-AS1	3.28208	5.16023	1.47758e-06
AC010883.5	1.08152	0.728125	1.51985e-06
RP11-57H14.2	2.41209	1.67449	1.57484e-06
Cabili_2865	0.552969	0.831421	1.59611e-06
GBM_LOC039120	0.752776	0.460138	1.63522e-06
CTC-524C5.2	6.83258	4.82435	1.65109e-06
RP11-343H19.2	4.56749	2.44902	1.68984e-06
CTA-29F11.1	11.1518	7.85571	1.75077e-06
USP2-AS1	0.612228	0.983342	1.77435e-06
LGG_LOC007388	0.6146	0.37529	1.80263e-06
RP11-31F15.2	0.7422	0.521245	1.85599e-06
AC005754.8	0.985058	0.466103	1.95578e-06
LA16c-349E10.1	0.705767	1.10915	1.96759e-06
RP11-267M23.1	0.624683	0.98683	2.01351e-06
RP11-867G2.8	0.832973	1.30827	2.11847e-06
Cabili_523	1.29789	2.19069	2.19146e-06
RP11-347I19.8	2.14451	1.39673	2.22616e-06
SLC2A1-AS1	0.542442	0.842314	2.33646e-06
RP11-307B6.3	4.59717	2.74614	2.39067e-06
CTD-2201G16.1	1.97454	0.882809	2.42534e-06
RP5-1116H23.4	0.630353	0.328297	2.50854e-06
Cabili_1930	1.12159	0.753016	2.52359e-06
MIR4458HG	4.577	6.53719	2.54782e-06
RP11-21L19.1	12.7965	7.98113	2.55693e-06
RP11-82L18.2	1.95911	2.78958	2.709e-06
ISX-AS1	0.77393	0.00705938	2.72523e-06
RP5-890E16.2	0.706839	0.474891	2.78466e-06
RP11-104O19.4	1.13325	0.743364	2.78466e-06
RP11-149I23.3	1.62674	1.06634	2.83522e-06
FAM212B-AS1	1.85834	1.29341	2.86594e-06
GBM_LOC028474	0.997883	0.69483	2.91793e-06
PAX8-AS1	1.63956	4.53723	3.05763e-06
RP11-589P10.5	2.14799	1.50042	3.14296e-06
SATB1-AS1	2.59811	1.3869	3.27731e-06
RP11-420N3.3	3.32131	1.95897	3.42085e-06
SERTAD4-AS1	1.23045	2.06529	3.75833e-06
FLJ21408	0.632036	0.424738	3.88534e-06
RP4-758J18.10	0.653836	0.975991	3.88534e-06
RP11-446H18.6	0.64529	0.376866	4.29174e-06
RP11-1017G21.6	1.29923	0.917392	4.33233e-06
KANTR	0.993641	0.658825	4.66701e-06
RP13-1032I1.11	1.32942	0.864564	4.66701e-06
RP11-23N2.4	0.932776	0.600839	4.73334e-06
LINC00839	4.48452	2.3892	4.79506e-06
AC012613.2	0.631988	0.422013	4.89203e-06
CTB-119C2.1	1.15922	0.715536	5.00267e-06
RP11-496H1.2	4.27075	3.00651	5.23726e-06
RP11-321F8.4	0.626817	0.441551	5.29286e-06
RP11-454H19.2	1.42683	0.964562	5.63902e-06
GBM_LOC032075	0.61604	0.385697	5.81305e-06
RP4-555D20.2	1.90771	0.905723	5.81305e-06
U91328.21	0.804419	1.40972	5.81305e-06
RP11-365P13.5	0.578598	0.379373	5.89512e-06
RP11-254F7.3	2.48994	3.60983	6.01332e-06
CHL1-AS2	1.40841	2.46419	6.07687e-06
RP1-8B1.4	1.10382	0.749337	6.30093e-06
RP13-20L14.1	0.791149	0.452291	6.38968e-06
ALDH1L1-AS1	1.02509	1.71635	6.48718e-06
FAM201A	1.22435	0.582992	6.48718e-06
RP11-186N15.3	0.612112	0.382954	6.48718e-06
RP11-219B17.3	0.814152	0.506941	6.58621e-06
Cabili_2195	0.639607	0.935308	6.59386e-06
RP11-108M9.4	3.07423	5.66458	6.72572e-06
LGG_LOC019760	0.647995	0.432527	6.74924e-06
HCG11	0.527613	0.844975	6.74924e-06
NEAT1	41.839	66.332	7.0461e-06
RP11-218M22.1	2.16481	3.36823	7.0461e-06
RP11-266K4.9	4.9517	3.49148	7.41547e-06
AC114730.7	3.14923	2.01548	7.44135e-06
RP11-21L23.3	1.29553	0.789392	7.70499e-06
RP5-1068E13.7	1.72159	1.21003	8.02355e-06
Cabili_2693	0.883417	0.353427	8.37426e-06
RP11-817I4.1	0.702219	1.00123	8.65928e-06
RP11-1143G9.4	2.9653	5.93492	8.84102e-06
CECR7	0.882041	1.82844	9.08899e-06
Cabili_159	14.5633	10.1629	9.21563e-06
RP11-473M20.11	0.646208	1.04258	9.26893e-06
LL09NC01-139C3.1	0.94841	0.58141	9.3655e-06
NKX2-2-AS1	12.7178	8.82913	9.46303e-06
RP5-912I13.1	0.571932	1.16	9.56155e-06
RP4-794H19.1	0.878401	1.29341	1.00805e-05
RP11-701H24.3	3.94775	2.48675	1.04095e-05
PVT1	7.30166	19.7899	1.04578e-05
RP11-130L8.1	1.49919	0.903402	1.0531e-05
RP11-799B12.4	0.9977	1.45165	1.08742e-05
RP5-1033H22.2	0.670444	1.0604	1.10884e-05
CTA-250D10.23	1.38834	0.892706	1.14364e-05
Cabili_1079	1.02431	0.0912672	1.1542e-05
LINC01521	2.50488	1.71652	1.16084e-05
AC007271.3	0.478538	0.693867	1.17691e-05
RP3-402G11.28	2.61396	1.83768	1.19591e-05
RP11-334E6.3	4.37082	3.03049	1.19591e-05
RP11-856F16.2	9.09895	6.31438	1.20827e-05
AC084125.4	0.580148	0.829011	1.22075e-05
CTA-250D10.19	2.2681	1.33719	1.23908e-05
RP11-435O5.4	0.92722	0.629401	1.23908e-05
CTD-3099C6.5	1.03344	0.599886	1.23908e-05
RP4-541C22.5	1.32098	0.912487	1.37554e-05
RP11-155G14.6	0.685848	0.982555	1.38968e-05
RP11-893F2.13	0.684785	0.44418	1.55276e-05
XLOC_009110	1.01676	0.5998	1.62977e-05
RP11-74H8.1	69.8024	42.9979	1.72217e-05
UG0898H09	17.3302	10.7169	1.80722e-05
RP11-799D4.4	0.797464	0.559257	1.89649e-05
CTD-2002J20.1	0.770883	0.450238	1.90094e-05
Cabili_378	1.32113	0.824363	1.90094e-05
RP11-227G15.10	1.50993	1.0163	2.10288e-05
RP11-384O8.1	0.417602	0.735962	2.11004e-05
GBM_LOC030373	0.873331	0.567178	2.12193e-05
MALAT1	57.4735	39.8737	2.34551e-05
CH17-437K3.1	0.818451	1.24831	2.39051e-05
RP11-61I13.3	2.95707	1.59017	2.43635e-05
CTA-14H9.5	1.14294	1.73758	2.44749e-05
RP11-128A17.2	0.72707	0.380767	2.57827e-05
RP11-247A12.8	2.00827	3.33911	3.27435e-05
AC004540.5	9.22128	5.89766	3.33638e-05
AC007563.5	1.83149	3.45291	3.3515e-05
CTB-58E17.5	0.810862	0.546662	3.63049e-05
Cabili_1332	5.21183	3.54697	3.68238e-05
LINC01170	1.05415	0.742776	3.75186e-05
LA16c-316G12.2	3.87975	2.72908	3.95479e-05
VAC14-AS1	0.626089	0.961357	3.95479e-05
RP11-284F21.10	1.66692	1.13173	3.98989e-05
LINC01150	0.616762	0.954694	3.98989e-05
LINC00869	2.22548	3.17519	4.0914e-05
RP11-557H15.4	0.765556	1.28716	4.15447e-05
RP11-572O6.1	0.710411	0.400973	4.82453e-05
GBM_LOC039943	0.841665	0.551282	5.15246e-05
RGMB-AS1	2.37274	1.67083	5.3983e-05
RP1-159A19.4	0.92294	0.617517	5.41616e-05
RP5-1031D4.3	1.33035	0.813024	5.61165e-05
DPP10-AS1	1.82188	1.04736	6.35059e-05
RP11-209D14.2	0.928713	1.33148	6.35059e-05
PCDH9-AS1	0.566852	0.864716	6.35059e-05
CTD-2012M11.3	1.47792	0.657872	6.64169e-05
RP5-1021I20.8	5.15796	3.09469	6.66349e-05
CTD-2020K17.1	0.619773	0.942497	6.72781e-05
MCM3AP-AS1	1.78914	1.21853	6.98454e-05
AC144831.3	0.862136	0.606967	7.25913e-05
RP11-352G9.1	0.537192	0.349246	7.55639e-05
AC002451.3	1.39487	0.840016	7.66101e-05
AC021188.4	2.55207	1.69415	7.77606e-05
RP11-442H21.2	128.243	89.2113	7.84334e-05
CTD-2035E11.5	0.595596	0.401485	7.91853e-05
IQCA1-AS1	0.632217	0.379944	8.07098e-05
GBM_LOC030682	0.569808	0.37391	8.50979e-05
RP4-719C8.1	1.13502	0.727257	8.6731e-05
RP11-98I9.4	1.71606	1.20817	8.70133e-05
GBM_LOC002313	1.51676	2.77811	8.83131e-05
CTB-92J24.2	0.693684	0.480454	9.30108e-05
CTD-2369P2.8	0.96614	1.62151	9.38105e-05
LINC00643	4.92497	2.2475	9.46169e-05
RP11-864G5.3	5.65807	8.31222	9.61127e-05
RP11-820L6.1	2.1017	4.28994	9.96995e-05
LINC01532	3.92502	2.60096	9.98158e-05
RP11-274B21.10	0.658421	0.453088	0.000101089
CTD-2349P21.10	0.587368	0.397215	0.000104637
AC005519.4	1.63028	1.07426	0.000108555
AC005356.1	1.1245	0.783275	0.000109581
RP11-95I16.4	0.845854	0.524774	0.000113575
RP11-701H24.7	0.654689	0.351186	0.000115625
GBM_LOC037098	0.647386	0.378632	0.000124331
RP11-106M7.1	0.704978	0.452288	0.000127344
GBM_LOC039900	1.17988	0.659377	0.000127753
AC140912.1	1.21056	0.66842	0.000128426
RP11-713P17.3	5.12539	3.45511	0.000132495
GS1-72M22.1	1.23769	0.748946	0.000132649
RP11-566K19.6	2.86662	4.36344	0.000137086
DIO3OS	1.06411	0.648742	0.000140515
RP11-48G14.3	0.912793	0.536559	0.000142405
Cabili_2207	0.748468	0.437539	0.000153643
RP11-550I24.2	1.0128	0.705997	0.000154446
RP11-298I3.6	1.61892	1.09329	0.000159572
FLJ35934	0.572451	0.381081	0.000168412
Cabili_747	1.31923	0.730062	0.000168412
CTD-2267D19.3	0.514232	0.803171	0.000184366
RP11-269C23.4	0.855264	0.548161	0.000185749
RP11-104H15.7	0.984302	0.681117	0.00018671
PWAR5	1.21583	0.783345	0.000202742
RP5-907C10.3	0.83248	1.53901	0.000202742
AC114730.3	6.66997	3.6495	0.000206478
RP4-610C12.3	0.563351	0.944164	0.000224186
CTD-2562J17.6	6.91718	3.82123	0.000224186
RP11-1263C18.1	2.63904	1.2482	0.000240466
CTD-2026G6.3	1.43548	0.808882	0.000246476
SUCLG2-AS1	0.724446	1.08489	0.000249782
RP11-29B2.6	0.552523	0.384544	0.000252426
CTD-3193K9.3	7.07487	10.1745	0.00025834
RP11-17J14.2	8.5198	5.05038	0.000272698
Cabili_2474	0.459371	0.687908	0.000303264
Cabili_360	0.529992	1.27803	0.000320745
RP11-205M5.3	0.499116	0.713797	0.000325513
RP11-317P15.5	0.582924	1.07154	0.000348982
RP11-455B3.1	0.571395	0.976576	0.000350178
RP11-245J24.1	0.845041	0.331387	0.000353023
RP11-407G23.5	0.683572	0.471299	0.000353023
RP11-348F1.2	0.828878	0.584052	0.000360864
GBM_LOC031096	4.5152	2.71561	0.000373298
RP4-798A10.7	4.20547	2.91776	0.000387049
LINC00652	1.28294	0.834643	0.000388237
CTC-297N7.10	1.57357	2.61021	0.00039651
RP11-589N15.2	0.55506	0.863263	0.000399712
Cabili_2534	0.601066	0.380208	0.000405583
RP11-400F19.18	0.758053	0.510765	0.000420759
CH507-513H4.1	0.658355	1.01185	0.000425507
RP11-190A12.8	0.640229	1.08289	0.000434475
SNORD109A	0.866261	0.497657	0.00044437
RP11-505P4.6	0.74629	0.519928	0.000467997
RP11-597M12.1	5.89802	3.83381	0.000478247
CH507-39O4.1	0.704527	0.478178	0.000524383
KB-1125A3.11	0.548736	0.374361	0.000524383
RP4-555D20.1	0.80549	0.469746	0.000531966
LINC01116	0.5808	0.885748	0.000536606
TNKS2-AS1	2.37281	1.53378	0.000541285
AC007009.1	0.646148	0.943931	0.000542921
TFAP2A-AS1	1.64229	1.03635	0.000613942
CDKN2B-AS1	0.633261	0.420721	0.000613942
AC009892.10	0.552466	0.815896	0.000613942
C21orf88	0.955902	1.36339	0.00062065
GBM_LOC042318	0.766196	0.499948	0.000638546
AC099668.5	1.0287	0.695587	0.000639985
RP11-797H7.5	0.634193	0.975412	0.000648652
RP11-1275H24.2	1.33119	0.867733	0.000650596
RAET1E-AS1	0.866838	1.23171	0.000652797
RP11-1055B8.4	4.97806	3.36549	0.000656714
RP11-165A20.3	1.46247	0.969725	0.000685243
RNU6ATAC35P	0.828151	0.522468	0.000690629
CTD-2291D10.4	0.85771	0.549264	0.000800939
RP11-110I1.14	0.553806	0.382842	0.000820386
RP11-430H10.1	4.16626	2.65239	0.000826173
RP11-395B7.4	0.911626	1.81714	0.000861246
RP11-104H15.8	3.50455	2.41691	0.000861246
LINC00894	1.07118	0.706744	0.000875288
RP11-140A10.3	1.38807	0.936964	0.000879479
RP11-320H14.1	1.15867	2.91755	0.00088693
Cabili_1653	1.67073	1.16615	0.000902652
AC069513.4	0.875444	0.618634	0.000994844
AC007292.7	0.91347	0.587417	0.0010143
LINC01268	2.14373	1.34592	0.00101769
ABHD15-AS1	1.11968	2.11893	0.00105154
RP11-181C3.1	1.40913	0.967386	0.00106035
CTB-113P19.1	1.11789	0.745035	0.00107087
AP000230.1	1.63627	2.32443	0.00108178
CTC-251I16.1	2.00963	2.85232	0.00109797
RNVU1-14	0.588176	0.833744	0.00120593
AC069363.1	1.82482	0.913633	0.00121428
GBM_LOC006541	0.865691	0.475959	0.00126635
FOXP4-AS1	0.459742	0.761493	0.00129255
RP11-867G23.10	0.64554	0.321279	0.00130324
C21orf37	1.8194	1.13438	0.0014042
AC092675.3	1.02212	1.56036	0.00141074
CTD-2062F14.3	0.570191	0.99911	0.00152649
AP000438.2	0.814111	0.459459	0.00155156
RP11-392E22.12	0.764795	0.479117	0.00164773
C14orf23	1.21955	2.08926	0.00167718
LINC01006	6.93105	4.79911	0.00169973
RP11-702H23.6	0.966219	1.46315	0.00186597
Cabili_2847	0.967635	0.565613	0.0020423
RP11-123O10.4	1.27188	0.589974	0.00208999
CTD-2544H17.2	0.806088	0.531051	0.00216933
RP11-861E21.1	0.91418	0.221888	0.00216933
Z83001.1	0.659747	0.412804	0.00221885
RP11-8P11.3	1.35927	0.961096	0.00226068
RP11-498C9.4	0.638057	0.450334	0.00230078
Cabili_448	0.68448	1.07987	0.00241267
RP11-275H4.1	1.38777	0.731968	0.00250496
LINC00982	3.07537	4.51809	0.00251619
GBM_LOC003055	1.75077	1.21386	0.00261548
RP11-64K12.10	0.594924	0.415805	0.00271091
RP11-844P9.2	1.49223	0.874499	0.00328907
MIR503HG	1.57208	1.09415	0.00332914
PART1	0.638973	0.977337	0.00392573
CISTR	0.756316	0.455241	0.00395336
RP4-647C14.3	3.20668	2.22882	0.00408329
RP11-551L14.6	1.10176	0.775163	0.00433865
RP11-328C8.4	3.01134	2.04304	0.00499309
LLNLR-470E3.1	1.16285	1.67947	0.00503058
RP3-369A17.4	0.750186	1.20554	0.00518988
GBM_LOC026870	0.550708	0.328003	0.0052786
RP11-78I14.1	0.630732	0.903091	0.00538047
AC005754.7	0.981056	1.43217	0.00563041
HLA-DQB1-AS1	2.1488	4.12441	0.00578697
bP-21264C1.2	8.77126	6.12731	0.00588503
RP11-445N20.3	1.33058	0.882051	0.00700974
RP4-535B20.1	0.712681	0.482566	0.00748165
RP3-395M20.12	0.883069	0.512509	0.0079523
RP11-500G22.4	1.29465	0.870898	0.00800971
CH17-140K24.7	1.4402	2.35002	0.00811662
RP11-61L14.6	9.139	6.1557	0.00812017
RP11-1094M14.14	0.699514	0.102166	0.00830869
CTD-2194A8.2	1.45152	0.937819	0.00855946
RP4-614O4.11	1.74714	1.22466	0.008924
RP11-236B18.5	1.07278	0.749341	0.0089966
RP11-552D4.1	7.68978	11.1113	0.00908863
RP11-10L7.1	1.1907	0.776243	0.0092793

## Sheet: NF1
lncRNA	Mutation median FPKM	WT median FPKM	FDR
AC097724.3	1.4441	3.32572	1.37684e-05
RP13-270P17.3	1.46297	0.545583	4.74729e-05
RP11-134G8.10	5.34959	2.52876	4.77481e-05
AC010226.4	2.69853	1.10478	4.77481e-05
RP11-823E8.3	6.31251	2.40696	7.68066e-05
RP1-178F15.5	2.79072	1.62481	9.54466e-05
SNHG18	2.68856	0.577249	9.54466e-05
RP11-54O7.3	0.447655	1.95048	0.000107427
GBM_LOC026050	0.421647	0.667841	0.000124708
RP11-77K12.4	2.42307	0.656099	0.00013352
RP11-798M19.3	5.53197	3.65609	0.00013352
RP11-54O7.16	0.172562	1.09552	0.000182801
GBM_LOC040061	5.08636	0.52481	0.000219525
GBM_LOC039120	0.360147	0.716932	0.000228014
RP11-61K9.3	3.21872	2.22962	0.000251421
MAPT-AS1	1.59865	5.14368	0.000251421
RP11-231C18.1	2.51891	16.3984	0.000251421
RP11-713C5.1	0.341699	1.3619	0.000251421
CYP17A1-AS1	1.50337	3.66997	0.000251421
ARSD-AS1	5.8926	2.19882	0.000290278
AP001469.9	1.19497	1.85401	0.000290278
RP11-295G20.2	2.87135	1.63983	0.000290278
RP5-1056H1.2	1.35257	8.05688	0.000290278
AC079305.11	0.170493	1.21098	0.000290278
RP11-82L18.2	4.65	2.097	0.000305685
GBM_LOC028295	0.140023	0.602418	0.000319074
RP3-337O18.9	8.83554	5.82303	0.000319074
AC017101.10	5.12605	2.98639	0.000319074
RP11-482H16.1	0.823452	1.77685	0.000379537
CTD-2555K7.2	0.567955	1.13091	0.000379537
LGG_LOC030946	0.18792	0.999583	0.000386903
LINC00844	32.1475	108.513	0.000386903
RP11-807H17.1	0.139611	0.806161	0.000386903
CTB-51J22.1	2.6692	1.23548	0.000418595
GBM_LOC021874	0.246773	1.15867	0.000418595
LINC01503	5.75347	2.91898	0.000457638
AC093620.5	0.439287	1.36119	0.000492987
RP13-270P17.1	3.85707	1.64773	0.000492987
DKFZp434J0226	0.143609	0.759857	0.000527179
AC068057.1	5.84397	1.33395	0.000577113
RP1-198K11.5	1.02481	0.63086	0.000707815
CTD-2132N18.4	1.60168	2.57842	0.000707815
RP5-901A4.1	1.60396	1.00426	0.000729914
AC092171.2	0.462088	0.719966	0.000729914
AC015933.2	4.27566	2.29899	0.000729914
LINC01057	4.42976	1.56573	0.000729914
RP11-676J15.1	0.954717	2.66752	0.000760849
LINC00689	0.647703	3.54667	0.000760849
RP11-132F7.2	0.256523	1.03171	0.000760849
GBM_LOC005589	0.278869	0.622239	0.000760849
RP11-1008C21.2	1.46049	0.894468	0.000774414
RP11-5C23.2	0.966793	0.508092	0.000774414
TP73-AS1	10.9696	3.27214	0.000774414
CTC-548K16.5	2.51862	1.04652	0.000774414
LGG_LOC027853	0.27033	1.34218	0.000774414
RP11-817I4.1	1.09245	0.729752	0.000797347
GBM_LOC047199	0.179875	0.802283	0.000797347
CTD-3157E16.2	7.31042	2.285	0.000797347
RALY-AS1	1.56037	0.879136	0.000797347
RP11-839G9.1	0.363441	1.09756	0.000797347
RP11-876N24.3	1.12935	0.566557	0.000848561
GBM_LOC028297	0.142495	1.13519	0.000848561
RP11-690D19.3	3.61677e-06	0.926397	0.000848561
RP11-10K16.1	2.16102	1.27334	0.000848561
KIAA1614-AS1	1.53134	0.998947	0.000892877
LINC00856	1.25401	0.679052	0.000892877
RP11-195F19.30	1.38252	0.549168	0.000986295
IGFBP7-AS1	22.4101	12.0923	0.000986295
RP11-182J23.1	0.30022	1.41479	0.0010743
LINC00467	3.50693	2.29778	0.00115238
RP11-161H23.5	26.1806	10.1183	0.001166
CTB-129P6.4	1.27187	0.733045	0.0012521
RP5-1142A6.9	4.27184	2.39482	0.0012521
RP11-420L9.5	4.06153	2.5249	0.00130468
RP11-231C18.2	0.229599	1.01748	0.00130468
GBM_LOC039272	0.36847	0.67623	0.00130468
RP11-342M1.3	3.12929	1.81916	0.00130468
SLC25A21-AS1	1.76575	3.40594	0.00130468
RP5-1142A6.2	1.32595	0.786231	0.00130468
HORMAD2-AS1	1.25408	0.842673	0.00130468
CTB-46B19.2	2.39644	1.64271	0.00135445
FAM182A	4.90504	7.88877	0.00135445
CTD-2561B21.11	0.351747	0.989942	0.00135445
RP5-850O15.4	0.967565	2.08389	0.00135445
RP5-906C1.1	1.79973	1.07351	0.00143223
AC002429.5	0.465947	1.49592	0.00143223
PAXIP1OS	2.60233	1.21812	0.00143223
RP11-73C9.1	0.838024	2.47668	0.00143223
RP11-849N15.3	1.12805	0.641671	0.00143223
RP11-265D17.2	1.5363	0.778505	0.00153834
RP5-956O18.3	38.4636	25.328	0.00153834
TPTEP1	1.39323	6.60923	0.00168148
LINC00152	8.71179	2.42184	0.00171803
TMCC1-AS1	2.03526	3.24661	0.00189041
RP6-201G10.2	1.29589	4.18896	0.00189118
RP11-403A3.3	13.6511	4.97499	0.00197474
FLJ16779	8.76221	24.9577	0.00197474
LINC00925	12.6366	30.0908	0.0019811
LINC00092	3.79764	0.837729	0.0019811
CTD-3157E16.1	3.78337	1.48504	0.0019811
RP11-801F7.1	6.72397	4.04263	0.0019811
MIR4435-1HG	7.43142	2.82908	0.00206655
LINC00960	0.582443	1.53751	0.00206655
RP11-305E6.4	0.890933	1.39268	0.00206655
RP11-315E17.1	0.278154	0.724973	0.00206655
CTD-2319I12.4	0.892011	1.49937	0.00206961
RP11-191L17.1	1.02608	1.52256	0.00216509
AP001258.4	2.18094	1.518	0.00216509
RP11-876N24.5	1.25342	0.736991	0.00216509
RP4-669P10.16	1.44743	2.56011	0.00216509
CTD-2033C11.1	0.734127	1.05726	0.00216509
GBM_LOC025187	0.133279	2.39136	0.00216509
RP3-406P24.5	0.321506	0.56675	0.00233101
MIR4519	3.61916	5.11829	0.00233101
SNHG1	37.0699	63.7011	0.00233101
AC105402.4	0.533224	0.832705	0.00242339
RP4-758J18.10	1.13011	0.689735	0.00242339
GBM_LOC042831	0.574834	1.2391	0.00242339
RP11-210M15.2	4.13041	6.98569	0.00242339
RP11-156K23.3	1.20537	0.745398	0.00242339
AC053503.11	1.19364	3.8084	0.00242339
NEAT1	83.332	45.0331	0.00242339
RP11-159H10.3	0.392894	1.10009	0.00242339
RP11-158M2.5	0.387425	0.907038	0.00260295
CTD-2017C7.1	0.860504	1.42794	0.00260295
CTA-445C9.14	3.8149	5.66389	0.00260295
RP11-48B3.5	2.46566	3.84554	0.00260295
RP11-463C8.7	0.165482	0.575665	0.00260295
AC074212.6	2.36865	1.59743	0.00275556
RP11-46J23.1	1.07156	1.58747	0.00275556
RP11-27M24.1	3.55848	2.09171	0.0028496
RP11-545E17.3	1.34105	0.762683	0.00299353
WWTR1-AS1	4.44237	1.81866	0.00299353
RP1-317E23.3	27.9935	16.6898	0.00299353
RP11-391M1.4	4.50107	7.49284	0.00299353
Cabili_378	0.523445	1.21107	0.00299353
RP1-122P22.2	3.66938	2.5585	0.00306152
RP11-177H2.2	0.27193	0.614033	0.00306152
FAM85A	2.04921	1.32394	0.00306152
RP11-609D21.3	4.18012	2.62987	0.00306152
RP11-111M22.4	1.21943	2.10669	0.00306152
RP11-840I19.5	0.504759	1.12329	0.00306152
RP11-876N24.7	1.51033	0.871183	0.00306152
RP11-398C13.6	0.836199	1.45598	0.00306152
RP11-81A22.4	2.31487	3.63119	0.00306152
RP11-680F20.11	0.336437	0.928157	0.00326556
RP11-359E10.1	5.58898	2.44644	0.00327073
SBF2-AS1	1.28997	0.56418	0.00327073
RP11-87C12.5	2.13278	3.54379	0.00327073
RP11-446H18.6	0.274357	0.612101	0.00347014
AC007563.5	5.42155	1.92892	0.00347014
AC083864.3	0.293337	1.21828	0.00379072
LINC00519	0.349618	0.883925	0.00379072
RP11-326I19.2	0.735498	1.05716	0.00380931
RP11-359E3.4	0.405071	0.61358	0.00380931
RP11-401P9.4	6.09647	13.513	0.0041137
U91328.21	1.51099	0.865314	0.0041137
RP11-130L8.1	0.725641	1.41709	0.0041137
RP11-230C9.4	0.482172	0.927458	0.0041137
CTC-510F12.6	7.75616	4.08185	0.0041137
RP1-193H18.2	1.64852	2.46113	0.00414478
RP11-173P15.3	35.4881	24.6282	0.00435782
GPR123-AS1	0.653323	1.56465	0.00436218
CTC-425F1.4	518.839	352.137	0.00438097
MYCNOS	0.792546	1.51554	0.00444326
SNHG19	48.8134	84.2208	0.00467873
RP11-839D17.3	1.04464	0.497949	0.00467873
RP11-429B14.4	2.34126	5.89741	0.00467873
RP11-279F6.1	0.88815	1.82657	0.00467873
RP11-395B7.7	10.9028	6.94014	0.00467873
RP11-342D11.2	3.12063	1.6366	0.00467873
RP11-632P5.1	0.158512	0.935037	0.00467873
RP11-1000B6.3	1.31453	0.68417	0.0047152
RP11-624M8.1	2.4054	4.99373	0.00498553
RP11-161M6.2	54.6018	132.532	0.00498553
RP4-665J23.1	5.0123	1.8434	0.00499705
RP11-20B24.4	13.8931	9.34421	0.00499705
RP11-5C23.1	3.43167	1.49798	0.00499705
AC062021.1	0.156036	5.28393	0.00499705
AC093673.5	11.4247	7.41359	0.00539436
EPB41L4A-AS1	37.707	60.1678	0.00539436
RP11-728F11.4	0.564033	1.54802	0.00539436
RP11-1134I14.8	1.98172	3.472	0.00539436
RP11-238F2.1	0.433904	1.19054	0.00539436
TOB1-AS1	1.53026	2.35859	0.00539436
AC073283.4	2.17604	3.99921	0.00579653
RNF219-AS1	1.85639	5.80324	0.00579653
RP11-120J1.1	3.84425	7.21342	0.00579653
MIR124-2HG	0.497997	1.96827	0.00579653
LGG_LOC013371	0.901899	0.616476	0.00603798
NUCB1-AS1	1.16049	0.780485	0.00603798
LINC01114	2.88234	1.7222	0.00603798
RP11-23P13.6	1.0823	0.587616	0.00603798
RP11-284F21.7	76.1259	169.903	0.00603798
RP11-323F24.3	0.447762	0.75946	0.00603798
CIRBP-AS1	1.3341	0.90854	0.00603798
GBM_LOC049497	0.444125	0.725762	0.00603798
RP11-143K11.5	0.240202	0.94545	0.00604883
RP11-131L12.4	0.673673	1.0304	0.00651216
ZFAS1	120.188	170.801	0.00651216
GBM_LOC032075	0.349706	0.586336	0.00651216
ZNF503-AS2	2.07381	1.29656	0.00658635
RP11-1182P23.5	0.404575	0.754181	0.00700545
LINC00869	3.36735	2.33471	0.00701987
RP11-2E11.5	0.52349	1.14901	0.00701987
RP11-341N2.1	0.590133	1.18602	0.00701987
RP11-259K15.2	1.47603	3.94538	0.00701987
RP11-999E24.3	11.0478	16.6975	0.00703373
RP11-104H15.9	1.32411	0.914413	0.00731733
RP11-192H23.8	0.922522	1.35723	0.00731733
KB-1460A1.5	2.75868	4.17895	0.00731733
CTD-3099C6.7	0.748005	0.502664	0.00731733
RP4-789D17.5	0.95674	1.48824	0.00731733
CTD-3193O13.14	9.74707	14.7774	0.00731733
RP11-973D8.4	2.70074	1.31693	0.00731733
RP13-650J16.1	1.36082	2.67758	0.00731733
LINC00599	1.07183	4.28632	0.00731733
RP11-220C2.1	0.682183	2.05667	0.00731733
XXbac-BPGBPG55C20.1	0.252445	0.616036	0.00780414
SNHG11	14.3996	9.73444	0.0078311
RP11-973D8.5	0.541788	0.87727	0.0078311
LPP-AS2	1.97177	1.36999	0.0078311
RP11-732A19.9	1.33458	0.922519	0.00840147
CTC-436P18.1	3.13286	2.14839	0.00845745
RP11-326I11.3	1.55454	1.06706	0.00847641
RP11-483H20.4	0.996253	0.623373	0.00854806
RP11-554A11.5	2.67314	1.75146	0.00896471
RP11-147L13.14	0.392071	0.604312	0.00896471
XXbac-BPGBPG55C20.2	0.780848	1.10492	0.00898511
RP11-83N9.6	0.409423	0.651399	0.00909612
WDR11-AS1	0.933989	2.04546	0.00909612
RP11-396C23.2	1.0902	0.516675	0.00909612
SNORA72	3.83302	5.75832	0.00909612
RP11-46H11.3	0.350303	0.579816	0.00914533
RP11-513M16.7	2.44794	4.2775	0.00964567
RP13-516M14.1	3.88244	5.83669	0.00964567
CTB-1I21.1	0.0945442	0.830361	0.00966292
AC002456.2	5.10994	2.20222	0.00966292

## Sheet: PTEN
lncRNA	Mutation median FPKM	WT median FPKM	FDR
TMEM246-AS1	0.472013	1.52335	7.05966e-08
RP11-508N22.13	0.373452	1.22985	7.05966e-08
HAR1A	0.213685	1.14748	7.05966e-08
CYP17A1-AS1	0.748895	3.76192	1.00003e-07
RP13-270P17.3	1.68104	0.550523	1.17662e-07
Cabili_2084	9.82475	32.5997	2.72674e-07
TP73-AS1	14.9116	3.27222	5.32968e-07
AC079305.11	0.0631176	1.21119	6.34946e-07
RP11-690D19.3	7.22384e-07	0.928838	6.34946e-07
ARSD-AS1	9.4835	2.25918	6.34946e-07
RP11-161H23.5	49.1226	10.0438	6.34946e-07
CRNDE	14.936	1.54759	6.34946e-07
RP11-348N5.9	0.312217	0.783031	6.96423e-07
RP11-357K6.1	0.166863	2.37231	7.00977e-07
RP11-305E6.4	0.564978	1.38437	7.00977e-07
HOTAIRM1	5.89624	0.635456	7.50298e-07
HAR1B	0.115346	0.556224	8.21923e-07
RP11-54O7.3	0.225603	1.9086	8.21923e-07
RP11-87C12.5	1.34979	3.56202	9.027e-07
LINC00672	2.2168	10.4605	1.1569e-06
RP13-270P17.1	4.90503	1.65661	1.42816e-06
RP11-93H12.4	0.512433	1.13369	1.45991e-06
AC062021.1	0.076245	5.43758	1.45991e-06
CTB-193M12.5	5.04622	1.9725	1.47137e-06
AC010649.1	2.62452	10.0472	1.47137e-06
CTD-3064H18.4	0.154848	0.680248	1.52488e-06
SLC25A21-AS1	0.301282	3.39676	1.95787e-06
RP11-227B21.2	0.750498	5.38706	2.30855e-06
RP6-201G10.2	1.07186	4.16893	2.52944e-06
EPB41L4A-AS1	27.3691	60.4151	2.82845e-06
RP11-46H11.3	0.110648	0.58296	2.82845e-06
SNHG18	5.13542	0.5788	2.84228e-06
LGG_LOC021000	0.721696	1.64956	3.02784e-06
RP11-706O15.1	0.719481	4.52924	3.03217e-06
RP5-1056H1.2	0.711501	8.01499	3.33728e-06
RP11-108L7.4	1.19505	2.39781	3.35717e-06
ZNF32-AS1	20.3822	36.8057	3.35717e-06
LEF1-AS1	1.76818	0.575466	3.35717e-06
AC010226.4	3.50748	1.11565	3.6108e-06
RP11-5C23.1	6.44736	1.48591	3.6108e-06
RP11-1C8.7	0.186446	1.28088	4.02226e-06
RP11-342M3.5	12.932	26.4157	4.02226e-06
GBM_LOC025187	0.0553797	2.49108	4.02226e-06
RP11-98D18.1	0.612715	2.73731	4.13787e-06
RP11-57H14.4	2.40496	3.67349	4.22622e-06
RP11-1263C18.1	0.455288	2.60516	4.22622e-06
RP11-7I15.3	2.31538	0.986359	4.22622e-06
GS1-72M22.1	0.242084	1.2396	4.58232e-06
LINC00599	0.753296	4.39138	4.58232e-06
RP11-231C18.1	1.13766	16.4141	4.72537e-06
SOCS2-AS1	2.16748	0.724207	4.80069e-06
RP11-77K12.4	3.21346	0.657681	6.54235e-06
GBM_LOC021874	0.199594	1.181	8.75882e-06
RP11-797D24.4	2.90103	5.78099	9.21795e-06
RP13-514E23.1	2.92929	4.86882	9.37119e-06
RP11-398C13.6	0.567677	1.46212	9.48254e-06
RP11-464F9.22	0.520845	1.43556	1.14151e-05
RPARP-AS1	4.21565	7.28586	1.14151e-05
AC009501.4	8.62715	4.721	1.14151e-05
AP003068.9	35.9889	60.0607	1.1619e-05
AC016910.1	0.32118	0.534458	1.26532e-05
PAXIP1OS	5.07003	1.22049	1.26532e-05
CTD-2132N18.4	1.46398	2.57122	1.68591e-05
CADM3-AS1	17.3197	48.5318	1.86463e-05
DYNLL1-AS1	6.10654	3.25127	1.92702e-05
RP11-134L10.1	5.00158	3.45799	2.00036e-05
AC053503.11	0.884671	3.85464	2.00036e-05
LINC00844	36.5149	108.037	2.06835e-05
TOB1-AS1	1.10304	2.40217	2.07804e-05
RP11-68I18.10	0.282778	0.680399	2.33221e-05
RP5-1119A7.17	0.401444	2.72564	2.54261e-05
Cabili_1904	0.229255	0.782929	2.6679e-05
RP11-496H1.2	2.14703	4.08076	2.68204e-05
RP11-247A12.2	0.443273	0.788083	2.82822e-05
RP11-258C19.7	2.31133	5.05311	2.83061e-05
RP11-21A7A.3	4.07911	10.4227	2.83349e-05
LINC00092	4.29657	0.837019	2.9889e-05
CTC-510F12.6	7.35312	4.04505	3.25902e-05
RP11-839D17.3	1.51953	0.493065	3.26371e-05
CTD-2521M24.9	4.14895	1.08547	3.33121e-05
RP11-118K6.3	0.678218	2.0799	3.43722e-05
RP11-265D17.2	1.66688	0.778348	3.43722e-05
LINC01114	3.39479	1.7209	3.43722e-05
RP11-609D21.3	11.6502	2.62652	3.43722e-05
AC002398.12	97.4042	19.41	3.46131e-05
RP11-119F19.5	0.708125	1.74407	3.46966e-05
RP11-73C9.1	0.676963	2.47233	3.54446e-05
RP11-286H14.8	10.6641	5.24118	3.71063e-05
RP3-425C14.4	4.71659	8.99502	3.71063e-05
CTB-129P6.4	1.36509	0.734259	3.71063e-05
RP11-624G17.3	2.43378	8.54054	3.72176e-05
RP11-5C23.2	1.10729	0.511171	3.87564e-05
BAALC-AS1	18.4627	6.2384	3.97447e-05
RP11-482M8.3	0.155707	0.646668	3.97447e-05
GBM_LOC005589	0.202038	0.623279	4.12028e-05
RP3-460G2.2	4.80063	0.489375	4.13632e-05
RP11-161M6.2	34.001	132.355	4.13632e-05
PWAR6	5.77055	14.0824	4.13632e-05
MORC2-AS1	2.22787	3.75356	4.13632e-05
RP5-850O15.4	0.94281	2.07565	4.13632e-05
AC000068.10	0.528269	1.159	4.13632e-05
CTD-2270P14.5	0.780625	1.85884	4.23111e-05
RP11-231C18.2	0.120404	1.0114	4.24877e-05
RP11-680F20.11	0.243183	0.905901	4.30534e-05
RP1-63G5.8	1.31268	9.72463	4.30534e-05
CTD-2341M24.1	2.76868	1.04853	4.40525e-05
RP11-278A23.4	0.319237	0.932329	4.42509e-05
AC073283.4	1.76809	4.04886	4.76427e-05
RP11-111M22.5	0.183425	0.520008	4.92169e-05
AC017116.11	24.0631	7.51868	4.92169e-05
RP11-713C5.1	0.235438	1.36626	4.92169e-05
MRPL23-AS1	0.165661	0.629862	5.27421e-05
RP1-293L6.1	0.0982478	1.75566	5.32438e-05
GBM_LOC025161	0.430026	1.36996	5.35079e-05
RP11-395B7.7	14.6832	6.95165	5.42995e-05
RP1-63G5.5	0.235207	0.779914	5.42995e-05
RP11-446F17.3	0.3906	1.01822	5.73961e-05
PVRL3-AS1	0.211786	0.900762	5.84908e-05
RP11-290F24.6	0.569011	1.07271	5.85755e-05
LINC00925	7.43748	29.9196	6.08005e-05
Cabili_1038	1.11562	2.10635	6.3231e-05
Cabili_1318	0.116503	0.747183	6.3231e-05
RP11-160O5.1	5.24697	1.79682	6.3231e-05
AC002456.2	5.93316	2.14776	6.51176e-05
LINC00641	7.46375	15.5053	6.51176e-05
NUTM2B-AS1	3.53932	5.24737	6.88359e-05
RP11-131L12.4	0.380561	1.03216	6.95453e-05
RP11-342M1.3	3.32583	1.81779	6.99487e-05
CTC-548K16.5	2.67009	1.04749	7.16408e-05
RP1-138B7.5	1.43131	2.65966	7.43748e-05
CTB-1I21.1	0.0491258	0.845579	7.61761e-05
RP11-597M12.1	2.35537	5.79355	8.05165e-05
RP11-279F6.1	0.623239	1.83963	8.35841e-05
RP11-395I6.3	0.971708	2.23117	8.67668e-05
RP11-309L24.2	6.0416	0.823487	9.0069e-05
SNORA72	3.29793	5.80435	9.51779e-05
RP11-124N14.3	178.864	69.4549	9.6188e-05
LGG_LOC030946	0.160351	0.971664	9.67807e-05
XXbac-B444P24.13	0.825676	2.22425	9.71222e-05
RP11-839G9.1	0.334211	1.09556	9.71222e-05
CTD-2561B21.11	0.26739	0.988241	9.77342e-05
RP11-454H19.2	0.666004	1.40304	0.000106536
RP11-1134I14.8	1.75608	3.48017	0.000107212
AC016747.3	5.33343	3.42578	0.000109824
DGCR9	0.818864	2.54632	0.000110529
RP11-54O7.16	0.160528	1.08274	0.000115992
RP11-196G18.23	1.76303	3.38897	0.000116748
RP11-143K11.5	0.237579	0.97781	0.000125535
RP5-965G21.3	0.396481	0.680359	0.000126359
RP11-521C22.2	0.25628	0.534628	0.000127193
RP11-21A7A.4	0.423501	1.08741	0.000129459
AC009227.2	1.46945	6.02478	0.000129459
RP4-758J18.2	19.0556	13.1049	0.000142872
GBM_LOC005796	0.293254	0.715768	0.000146362
RP11-632P5.1	0.0956322	0.921883	0.000149937
RP3-525N10.2	7.23156	17.4892	0.000150949
Cabili_986	1.20721	0.589555	0.000152635
CTD-3099C6.7	0.831777	0.502636	0.000158423
RP11-973D8.4	3.12508	1.30532	0.000164425
RP11-434B12.1	0.860953	1.66471	0.000171388
RP11-574K11.32	10.359	16.5651	0.000173751
Cabili_1927	0.445792	1.10282	0.000173751
RP11-463C8.7	0.0924229	0.595856	0.000174652
SLC16A1-AS1	0.939962	0.590419	0.000174652
LINC00643	1.76039	4.57161	0.000178936
RP11-728F11.4	0.385735	1.54126	0.00019388
DKFZp434J0226	0.101528	0.755434	0.000194923
OSER1-AS1	15.6451	22.4982	0.000194923
RP11-351D16.3	0.280205	0.649034	0.000196298
RP11-545E17.3	1.57749	0.764149	0.000206323
MIR4697HG	5.85963	14.0551	0.000206323
LINC00152	10.9484	2.44299	0.000206323
RBFADN	0.495961	0.968217	0.000206323
RP11-75I2.3	0.905953	2.44764	0.000211391
RP11-74E22.8	1.76164	6.48087	0.000223156
MZF1-AS1	1.91831	1.00995	0.00022476
AC097724.3	1.46706	3.23303	0.000226087
RP4-742C19.13	2.29826	3.9951	0.000226087
AC144831.3	0.399101	0.830215	0.00023462
CTB-51J22.1	3.15941	1.2468	0.000242134
RP11-499P20.2	0.979774	1.90677	0.000242134
GBM_LOC040061	4.01421	0.536386	0.000248081
RP11-686O6.2	2.04598	3.19405	0.000261819
LL22NC03-N64E9.1	0.333365	1.41884	0.000262327
RP11-443B20.1	1.08047	0.570925	0.000262327
RP11-169D4.2	0.253321	0.73514	0.000265382
LBX2-AS1	1.05829	0.489775	0.00027887
FLJ42627	1.89736	3.40645	0.000284211
C10orf85	0.895356	2.51559	0.000284211
RP11-127B20.2	2.24094	4.69765	0.000287532
GS1-124K5.4	12.8253	8.30097	0.000294589
RP11-227G15.10	0.65123	1.39618	0.000296788
Cabili_1858	0.930698	3.83675	0.00029901
RP11-513M16.7	2.07022	4.30052	0.000302521
MIR4435-1HG	10.3992	2.85859	0.000304797
LINC00632	1.11946	3.87346	0.000316233
FAM181A-AS1	4.08029	0.647978	0.00031894
RP11-359E3.4	0.325406	0.614348	0.00031894
DNMBP-AS1	0.381688	1.15659	0.00031894
LINC00839	0.60586	4.28466	0.00031894
RP11-4N23.4	0.714027	1.79488	0.00031894
RP11-799D4.4	0.457958	0.758203	0.000319812
CTD-3157E16.1	5.01126	1.49326	0.000322272
RP1-178F15.5	3.58514	1.63626	0.000334378
AC003102.3	0.282129	0.584759	0.000338362
RP11-269C23.4	0.360442	0.805128	0.000351051
RP11-303E16.2	4.43112	2.11008	0.000359689
RP11-667K14.3	1.32125	2.21301	0.00036247
RP11-132F7.2	0.213559	1.02902	0.000366797
RP11-441O15.3	0.298355	0.627295	0.000374064
LINC00235	0.341057	0.594222	0.000374064
HORMAD2-AS1	1.51754	0.845845	0.000392894
SNHG1	32.1745	63.9385	0.000398851
Cabili_1225	1.26677	0.619766	0.000398851
RP1-65J11.1	2.00665	0.921555	0.000398851
LINC00863	1.01999	1.76261	0.000403635
LINC00960	0.422771	1.54286	0.000418699
WWTR1-AS1	5.67277	1.83961	0.000434301
RP11-582J16.4	0.397424	0.585283	0.000440978
SBF2-AS1	1.41376	0.570373	0.000440978
ZNF529-AS1	4.75573	2.83556	0.000440978
RP11-767C1.2	0.388305	0.841457	0.000444305
RP5-956O18.3	37.6993	25.5056	0.000444305
RP11-482H16.1	0.863025	1.76614	0.000445857
RP4-665J23.1	6.4234	1.83623	0.000445857
RP11-173P15.3	42.8479	24.8894	0.0004494
LINC00622	0.267433	0.567392	0.000454834
RP11-429B14.4	2.03236	5.8444	0.000471655
RP11-290L1.2	0.279985	0.570825	0.000471655
Cabili_1242	0.790551	2.01123	0.000481275
RP4-669P10.16	1.26598	2.56261	0.000485027
RP11-999E24.3	8.06969	16.5683	0.000515392
RP11-725P16.2	0.519854	1.6552	0.000525887
RP11-57H14.2	1.51273	2.27744	0.000532257
RP11-801F7.1	7.21413	4.06262	0.000536527
PPP3CB-AS1	8.39544	15.5123	0.000545147
XXbac-B461K10.4	6.77227	11.0105	0.000545147
RP11-159H10.3	0.19219	1.08946	0.000545147
CTD-2651B20.1	0.448415	0.84086	0.000565269
CTD-3092A11.2	3.04404	1.74021	0.000565269
RP11-767N6.7	4.85131	2.74638	0.000565269
LA16c-380A1.1	0.716536	1.39468	0.000565269
RP11-119F7.5	1.10424	2.01531	0.000565269
AC012507.3	1.51874	0.506782	0.000583834
RP11-281O15.4	0.56151	0.931741	0.000583834
RP11-130L8.1	0.758247	1.42081	0.000598138
RP11-360L9.7	2.09454	0.968918	0.000605432
SATB1-AS1	1.19063	2.40671	0.000607956
RP11-59C5.3	0.406371	0.778984	0.000607956
AC083864.3	0.396016	1.2104	0.000620412
Cabili_195	0.441124	0.647028	0.000620412
GAS5	100.146	191.329	0.00062306
RP11-179B2.2	0.3197	0.540575	0.00062306
CTD-2017C7.1	0.805682	1.42882	0.000630694
CTD-3193O13.11	8.23625	23.2696	0.000643558
RP11-340F14.6	1.16478	2.77501	0.000643665
RP11-111M22.4	1.15909	2.10488	0.000648956
FLJ16779	8.18041	24.5008	0.000654296
RP11-323P17.2	0.490032	0.997064	0.000662327
RP11-355I22.2	0.456138	0.988956	0.000675986
AC005356.1	0.589251	1.08223	0.000675986
KIAA1614-AS1	1.7245	1.00176	0.00069824
LINC00237	2.66558	8.43597	0.00069824
RP11-543C4.1	0.36282	0.736228	0.000721212
AC002398.13	3.58374	2.50561	0.000728075
Cabili_2898	0.770158	1.57487	0.000728075
RP13-650J16.1	1.26514	2.66696	0.000728075
AC093818.1	1.22158	0.695075	0.000728075
IGFBP7-AS1	24.7052	12.2433	0.000728075
LINC00961	1.39463	0.772038	0.000766858
RP11-417N10.4	9.88398	15.6325	0.000770439
CTC-241F20.3	1.55225	0.893773	0.000770439
PITRM1-AS1	0.740564	1.1778	0.000778079
RP11-315E17.1	0.253879	0.729379	0.000778079
RP11-385G16.1	0.797075	2.14568	0.000778079
CTD-2201E18.3	2.49139	1.44634	0.000778079
LINC00665	16.5017	11.2261	0.000778079
LRRC75A-AS1	253.989	494.825	0.000784587
RP11-195F19.30	1.31637	0.55118	0.000784929
RP11-158I9.8	1.04917	1.71729	0.000788749
KB-1460A1.5	2.2332	4.16929	0.000788749
AC093673.5	13.3056	7.42011	0.000808022
Cabili_747	0.439497	1.26906	0.000824891
CTB-179K24.3	4.30593	2.90347	0.000831822
LINC01503	7.40942	2.92153	0.000833109
AP000230.1	3.89786	1.73318	0.000833109
GPR123-AS1	0.387152	1.54438	0.000833109
DIO3OS	0.509391	1.01822	0.000864028
AC140912.1	0.313805	1.12484	0.000871315
RP11-403A3.2	3.63819	1.02596	0.000886599
RP11-326I11.3	1.82507	1.07909	0.000886599
AC015936.3	35.053	13.9864	0.000933401
MIR124-2HG	0.442244	1.99376	0.000941275
RP11-19P22.8	10.0325	14.8853	0.000984311
Cabili_1510	0.99082	1.65279	0.000984311
AC104655.3	0.794922	1.88225	0.000984311
RP11-23E10.3	0.237827	0.549736	0.000992619
RP11-432J22.2	0.487057	0.871714	0.0010049
RP11-1017G21.5	1.46768	2.6983	0.00101933
CTD-3032J10.2	1.46448	0.850203	0.00101933
RP11-454E5.4	2.35327	3.6439	0.00101933
RP11-506K6.4	0.303429	0.600182	0.00102469
U91328.21	2.03844	0.868778	0.00102469
GBM_LOC026050	0.380066	0.662239	0.00104289
RP11-758H9.2	3.39854	5.10159	0.00104289
CTD-2176I21.2	0.364402	1.46803	0.00104289
AC092675.3	2.31911	1.0388	0.00106817
RP11-1017G21.6	0.685875	1.23227	0.00107725
AC025165.8	3.80809	6.61523	0.00109305
XXbac-BPG283O16.9	3.33564	5.19439	0.00109305
GBM_LOC026352	0.866962	0.550385	0.00109305
RP11-565F19.2	1.04583	0.662478	0.00110236
AC015933.2	3.76575	2.30839	0.00114306
CTB-129O4.1	1.11593	1.89033	0.00114306
RP11-326I19.2	0.681113	1.05298	0.0011528
C21orf88	2.78794	1.01772	0.00115908
RP11-203M5.8	11.9904	6.33461	0.00115908
XXbac-BPGBPG55C20.1	0.190783	0.610482	0.00117347
RP11-307B6.3	1.61833	4.17543	0.00117991
RP11-317J10.2	3.5752	1.39088	0.00117991
RP11-155G14.6	1.37871	0.696538	0.00120841
RP11-182J1.3	2.90497	4.47494	0.00123756
AC010761.6	1.50438	0.93558	0.00128692
CTB-58E17.5	0.466106	0.785687	0.00133643
FLJ37035	2.92839	4.32095	0.00133643
RP11-523H24.3	2.21988	3.56347	0.00133643
XXbac-BPG299F13.17	0.744025	1.24122	0.00133643
DYX1C1-CCPG1	2.19218	1.37366	0.00136852
CTB-119C2.1	0.529158	1.05082	0.0013697
RP1-193H18.2	1.44635	2.46425	0.00137612
XXbac-BPGBPG55C20.2	0.583685	1.09418	0.00139314
ERVK3-1	39.431	25.6537	0.00140093
AF131215.9	2.42965	3.9676	0.00140093
LA16c-380H5.5	1.0494	1.89722	0.00142625
RP11-513M16.8	2.91729	5.19198	0.00142625
CPB2-AS1	1.42198	2.01903	0.00142756
RP11-4L24.3	0.829593	1.67397	0.00143431
RP1-179N16.6	0.452973	0.939294	0.0014645
GBM_LOC037116	0.356681	0.867266	0.00149956
RP11-923I11.3	1.91037	3.15245	0.00150955
RP11-707G14.7	0.449617	0.698509	0.00150955
FOXD3-AS1	3.49009	0.947154	0.00150955
RP11-38P22.2	13.784	3.24777	0.00150975
RP11-48B3.5	2.40293	3.85812	0.00150975
RP11-341N2.1	0.542153	1.19042	0.00150975
GBM_LOC039589	0.329462	0.525514	0.00150975
SNHG6	120.129	172.131	0.0015416
CTD-2380F24.1	0.633761	2.19204	0.0015416
RP11-61L14.6	3.2629	8.91447	0.00156071
GBM_LOC030373	0.413403	0.834403	0.00156978
DICER1-AS1	5.38711	10.2015	0.00162553
LINC00467	4.17549	2.32731	0.00163947
RP11-152N13.5	1.06676	1.92546	0.00166946
RP11-809O17.1	0.958885	0.555578	0.00168556
LPP-AS2	2.11998	1.37365	0.00169548
CTD-2653D5.1	0.205694	0.592279	0.00169548
RP11-403A3.3	14.9457	5.01582	0.00169729
GBM_LOC004609	0.32114	0.564484	0.0017119
RP11-597D13.9	4.45625	1.79183	0.0017924
RP11-140A10.3	0.856604	1.33051	0.00179433
LINC01089	8.71926	15.2255	0.00179548
ZFAS1	117.659	170.399	0.00179548
SVIL-AS1	12.7704	21.9817	0.0018177
LHX5-AS1	0.0501747	1.28538	0.00182857
ZEB1-AS1	6.29432	9.24061	0.00182857
RP11-46C24.7	2.66672	4.20004	0.00183954
RP11-321A17.6	0.767109	1.25219	0.00183954
GBM_LOC025565	0.244497	0.655161	0.00186231
ALDH1L1-AS1	2.0995	1.06227	0.00192786
RP13-726E6.2	0.523895	1.1136	0.00204274
RP11-134G8.10	4.75553	2.60127	0.00204274
RP11-56B16.4	9.62179	4.97954	0.00206026
ZNF571-AS1	1.49781	3.22062	0.00206261
AC006160.5	1.44785	0.853259	0.00207503
PCAT19	1.01052	0.66367	0.00207503
RP11-218C14.8	6.52627	2.51941	0.0020823
LGG_LOC007388	0.232466	0.567177	0.0020823
RP11-196G18.24	2.50358	5.30399	0.0020823
RP11-973D8.5	0.335404	0.873821	0.0021002
RP11-482D24.3	2.13524	1.33374	0.00211022
RP11-391M1.4	4.12429	7.47661	0.00211022
RP11-299G20.2	0.271832	0.695595	0.00211022
TRAPPC12-AS1	0.674029	1.22148	0.00211022
RP11-368P15.3	1.82473	3.30721	0.00212839
RP11-380L11.4	2.12833	3.83269	0.00215465
RP11-214N9.1	0.887315	1.72386	0.0021732
RP11-269C23.5	1.01078	2.10385	0.00219998
RP11-338N10.1	0.290271	0.574787	0.00222708
RP11-123O10.4	0.00330486	1.24251	0.00224075
Cabili_2875	0.854561	1.22484	0.00226835
RP11-18I14.11	0.707914	1.10683	0.00228787
RP11-134K13.4	0.475639	0.800402	0.00230197
AC096772.6	2.75562	4.21093	0.00230197
RP11-680F20.12	1.20196	2.75952	0.00241712
LINC01057	4.28385	1.5958	0.00242343
RP11-323F24.3	0.388031	0.739912	0.00242343
AC012442.5	1.01622	1.49226	0.00242343
GBM_LOC004742	0.352533	0.550394	0.00242343
RP11-54O7.17	0.640991	1.53536	0.00244428
RP11-81A22.4	2.25856	3.6309	0.00245946
GBM_LOC045448	0.0787206	0.702957	0.00248063
RP11-131L12.3	0.597152	0.953163	0.00248381
JMJD1C-AS1	0.724413	1.38868	0.00256982
RP11-361F15.2	0.392024	1.08974	0.00266829
RP11-21A7A.2	2.38063	6.33337	0.0027839
RP11-362J17.1	0.308127	0.600558	0.0027839
RMST	4.6357	1.98736	0.00280771
RP11-394J1.2	1.57999	0.686153	0.00283173
RP11-455O6.9	0.294986	0.648748	0.00283538
GBM_LOC035081	2.09276	1.42708	0.00285964
RP5-912I13.1	1.29011	0.632267	0.00289452
RP13-516M14.1	3.80082	5.79518	0.00302632
CTD-2228K2.7	9.96579	16.1893	0.00306311
GBM_LOC016701	0.20415	0.535957	0.00308921
RP5-1007F24.1	0.681732	2.69233	0.00310841
ZNF561-AS1	13.4263	8.68444	0.00310841
RP11-215G15.5	0.41016	0.92146	0.00311248
RP11-867G23.10	0.182944	0.607452	0.00313902
RP11-166D19.1	23.2331	33.5556	0.00318979
RP11-798M19.3	5.40194	3.67407	0.00318979
RP11-83N9.6	0.391038	0.647977	0.00329856
RP3-466P17.2	1.04089	2.37939	0.0034108
CTA-445C9.14	3.54828	5.63777	0.00343977
RP3-518E13.2	6.3262	19.5913	0.00347361
CH17-270A2.1	0.37104	0.693418	0.00347361
CTD-2132N18.2	1.03688	2.01155	0.00350311
RP11-359B12.2	2.11042	3.61882	0.00350781
RP11-452L6.7	1.28835	2.16571	0.00356764
SUCLG2-AS1	1.49504	0.759075	0.00356764
RP11-95O2.5	1.31428	2.50396	0.00357245
FAM13A-AS1	0.325047	0.523835	0.00360279
RP1-266L20.2	1.01237	2.07552	0.00363338
Cabili_2293	0.88249	0.451402	0.00367724
GBM_LOC047199	0.127342	0.775433	0.00370844
RP11-442N24__B.1	1.17509	0.821992	0.00382229
LA16c-OS12.2	0.888084	1.34468	0.00382229
DPP10-AS1	0.54691	1.72061	0.00389575
LINC00998	57.9496	39.0806	0.00398456
CTA-29F11.1	5.37617	10.3741	0.00401825
RP5-1116H23.4	0.285286	0.59454	0.00406651
ZNF350-AS1	0.731621	2.5308	0.00410087
RP1-257I20.14	0.342959	0.601638	0.00419406
HCP5	6.32831	2.25258	0.00422629
XLOC_078028	0.674346	1.07975	0.00422629
AC002451.3	0.657439	1.31157	0.00422629
RP11-318E3.9	0.845088	1.23808	0.00426196
LINC01023	5.28677	3.56945	0.00426789
RP11-468E2.10	1.05196	1.84695	0.00428886
DLG5-AS1	1.17407	1.7721	0.00438298
CTD-2267D19.3	1.06814	0.539966	0.00441995
RP11-159D12.8	4.15677	2.7411	0.00444794
CTD-3157E16.2	6.72844	2.29859	0.00448546
CTD-2521M24.6	1.2044	0.80091	0.00449181
RP11-618M23.5	0.194174	0.521101	0.00452034
GBM_LOC004789	0.939497	1.76322	0.00452034
RP1-317E23.3	26.4726	16.7545	0.0045744
LA16c-360H6.1	0.362671	0.669293	0.0046035
AC000123.4	1.22408	0.863236	0.0046035
KB-1125A3.11	0.257526	0.535688	0.00467864
RP11-64K12.10	0.279305	0.589538	0.00467864
TMEM147-AS1	5.59397	3.81626	0.00467864
RP11-124D2.3	36.7615	55.8978	0.00478414
AP000438.2	0.340604	0.809375	0.00482165
MIR22HG	5.21329	3.38197	0.00483305
TNK2-AS1	0.410647	0.648798	0.00483305
RP11-334A14.5	3.31332	5.30691	0.00483305
MIAT	2.0878	4.72786	0.00487381
Cabili_1456	3.03111	5.33433	0.00489537
RP11-178H8.7	1.35809	1.94567	0.00489537
RP11-463J10.3	16.57	31.8691	0.00489537
GBM_LOC006520	0.178029	0.679839	0.00493667
RP11-98D18.9	1.51536	2.59613	0.00499556
CIRBP-AS1	1.33976	0.922396	0.00508767
RP11-701H24.3	1.72117	3.64565	0.00509523
RP1-198K11.5	1.15051	0.634821	0.00512047
CTC-458G6.2	0.229101	0.726216	0.00517134
RP11-358L22.3	1.18671	1.77609	0.00517134
LL22NC03-2H8.5	0.23047	0.529329	0.00520476
CTB-46B19.2	2.48421	1.66618	0.00520476
ZBED5-AS1	15.5261	10.6683	0.00530079
SNHG9	56.4216	37.7141	0.00530079
LINC01159	1.62439	0.992377	0.00555122
RP3-395M20.12	0.383233	0.793934	0.00561704
CTD-2126E3.3	1.61425	1.08312	0.0057007
PRMT5-AS1	9.61021	14.3801	0.0057007
AF131216.5	1.81744	4.07397	0.0057007
GBM_LOC042831	0.561924	1.22888	0.00582766
Cabili_2279	1.03615	1.67324	0.00583644
TPTEP1	1.33607	6.42236	0.00587413
RP11-731J8.2	2.92238	4.71303	0.00587413
Cabili_2592	0.293162	0.590639	0.00591211
GBM_LOC039272	0.330033	0.666105	0.00610552
RP11-83A24.2	1.34678	0.915726	0.00616588
LGG_LOC027853	0.412642	1.34467	0.00621739
GLIDR	1.52244	3.02876	0.00625758
Cabili_2534	0.23148	0.562192	0.00637224
DPH6-AS1	2.22359	1.2672	0.00637224
AP001258.4	2.51816	1.5326	0.00642542
WDR86-AS1	0.288276	0.664715	0.00648897
RP11-464F9.20	0.485258	0.881206	0.00648897
RP11-420N3.3	1.64925	3.05309	0.00656527
AC083949.1	1.43349	0.658802	0.00665064
RP11-1055B8.3	1.42535	4.07454	0.00665064
RP11-807H17.1	0.112205	0.77599	0.00665064
DGUOK-AS1	1.00003	0.674242	0.00666093
RP11-452L6.1	1.88162	2.79603	0.00669199
ALDH1L1-AS2	4.79833	1.57562	0.00669199
AC074212.5	5.21169	2.54004	0.00674779
RP11-388M20.1	0.374698	0.606179	0.00687143
RP11-401P9.5	0.430986	1.0868	0.00687143
RP11-158M2.5	0.279958	0.892191	0.00691619
RP11-112J3.16	0.713985	1.40802	0.00691619
MIR3911	1.83381	3.4566	0.00692702
RP3-369A17.4	1.9655	0.804377	0.00697221
RP3-337O18.9	8.94378	5.84491	0.00697221
RP5-1024C24.1	1.2881	0.477172	0.00703029
GBM_LOC028290	1.04941	1.73038	0.00704136
SNHG11	14.1096	9.75053	0.00709999
CDKN2B-AS1	0.251392	0.59631	0.00715768
RP11-1191J2.2	1.80955	0.756236	0.00715768
CTD-3193O13.14	9.73302	15.061	0.00715768
RP11-893F2.13	0.325118	0.673043	0.00736381
H19	2.71895	0.525464	0.00739758
CTD-2659N19.2	11.8334	7.55503	0.00739758
RP11-277P12.20	0.29778	0.650157	0.00739758
RP11-196G18.22	1.11807	2.17	0.00739758
RP11-38L15.2	1.8297	2.75541	0.00755944
AC147651.4	1.20677	0.572238	0.00762219
RP1-257A7.4	1.09783	1.69063	0.00777503
RP11-98D18.17	0.492102	1.05444	0.00777503
RP13-20L14.1	0.325854	0.712228	0.00786561
RP11-408A13.4	0.893023	1.41737	0.00793075
RP11-116N8.1	2.06131	3.37698	0.0081034
RP11-483P21.2	0.912103	1.49174	0.00833345
RP1-8B1.4	0.45652	1.07685	0.00833345
LINC01137	2.5095	1.41079	0.00840221
CTD-3193K9.11	0.91688	1.83678	0.00847047
RP11-771K4.3	0.450904	0.751566	0.00847047
CTD-2510F5.4	3.64363	1.85994	0.00847047
FAM201A	0.479805	1.09399	0.00848402
RP11-412D9.4	1.1968	1.76481	0.00852489
RP11-823E8.3	4.84276	2.44636	0.00852489
RP11-299G20.5	0.633599	1.91492	0.00858065
RP11-47A8.5	1.26432	2.05561	0.00858065
AC006538.1	1.29368	2.02262	0.00862167
RP11-500G22.4	0.495362	1.23704	0.00862167
NEAT1	78.4129	45.0304	0.00889571
CTD-2562J17.9	4.07411	7.22321	0.00914715
RP11-220C2.1	0.685709	2.06389	0.00920699
AC104653.1	1.47283	0.81011	0.00920699
PSMG3-AS1	7.72022	5.28142	0.00928265
RP11-386G11.10	664.308	431.192	0.00932776
PLCG1-AS1	2.08933	1.47431	0.00932776
Cabili_2195	1.15145	0.666048	0.00932776
RP11-477D19.2	0.517173	0.845895	0.00932776
RP11-396C23.2	1.2369	0.523262	0.00937359
RP11-1191J2.5	1.4423	0.547952	0.00937359
RP11-362K14.7	3.92317	2.24008	0.00937359
CTD-2235C13.3	0.4232	0.710229	0.00938895
CTA-250D10.19	1.10258	2.13586	0.00946613
AC005754.8	0.474293	0.808069	0.00946622
RP11-386G11.3	2.93709	6.47464	0.00946622
RP11-817I4.1	1.27715	0.737752	0.00951287
RP11-547I7.1	0.28188	0.587621	0.00960684
RP11-15B17.1	1.48263	0.925001	0.00960684
RP11-414H17.5	0.29811	0.56086	0.00979717
AP000255.6	0.388562	0.817303	0.00979717
TINCR	0.456123	0.82107	0.00986163
RP3-466P17.1	0.600264	1.33252	0.00986163
RP11-10K16.1	1.97865	1.27986	0.00992655
MIR219A2	2.23274	7.33324	0.00992655

## Sheet: TP53
lncRNA	Mutation median FPKM	WT median FPKM	FDR
AC068057.1	0.450854	5.00956	6.35872e-68
RP11-258F1.2	1.31194	3.46177	2.5902e-58
TPTEP1	40.5579	1.72513	3.30865e-52
RP11-421L21.3	8.51825	4.4334	2.85605e-44
CTB-32O4.3	1.00486	0.374259	1.05959e-39
RP1-184J9.2	0.683848	0.408156	4.15473e-38
RP11-38P22.2	1.88909	7.31136	9.94523e-38
Cabili_360	0.192693	2.01807	9.94523e-38
NFIA-AS2	8.82519	2.33749	1.22646e-37
GRPEL2-AS1	1.04483	1.85573	1.79294e-37
RP5-1042I8.7	2.69204	1.33523	2.68352e-37
RP4-789D17.3	6.33425	3.96178	3.80818e-36
RP11-134G8.10	1.45083	3.91313	1.40653e-33
RP11-181G12.2	2.79212	1.47695	7.19409e-33
GBM_LOC028290	3.57297	0.905295	3.63269e-32
Cabili_2815	11.7215	5.72249	1.15917e-31
C14orf23	0.652242	2.56979	2.15722e-30
LINC01355	1.25025	0.575024	2.71031e-30
RP11-804H8.6	1.50998	0.766922	4.05992e-30
AC011330.13	1.71029	3.24597	2.245e-29
RP5-930J4.4	52.9153	36.9835	9.06987e-29
LINC01356	0.885068	0.430622	2.32261e-28
RP1-43E13.2	2.03225	1.07931	7.02379e-28
Cabili_1019	6.32446	4.02487	8.84807e-28
RP11-54O7.17	2.86437	0.833384	3.00003e-27
RP11-56P23.1	2.51308	1.65543	4.47479e-27
GBM_LOC039777	1.13941	0.454556	2.2442e-26
RP1-20B21.4	51.4796	30.9972	6.31771e-26
CTD-2002J20.1	1.04121	0.438041	6.74388e-26
RP4-671G15.2	1.25839	0.693712	6.74388e-26
RP11-196G18.24	7.49122	3.74217	7.45376e-26
RP4-773N10.4	3.32073	2.11661	1.08139e-25
SZT2-AS1	3.73381	2.46795	1.61385e-25
RP11-467L24.1	1.41488	0.245722	2.03633e-25
CHL1-AS2	0.901791	2.58315	3.41693e-25
RP11-823E8.3	1.7086	4.09228	2.15109e-24
SNAP25-AS1	0.837433	2.48319	3.51984e-24
AP000439.1	1.00797	0.395963	7.52877e-24
RP1-159A19.4	1.41861	0.55648	2.71141e-23
RP11-527D7.1	0.774661	3.04575	3.04522e-23
RP11-418J17.1	5.34909	3.63729	3.83148e-23
WDR11-AS1	3.73018	1.30462	5.39811e-23
FLJ37453	3.79012	2.58573	5.39811e-23
RP11-31F15.2	0.841229	0.540045	8.61451e-23
LINC00662	11.5877	7.31908	8.61451e-23
RP1-239B22.5	0.852689	1.95334	9.65299e-23
RP4-798A10.7	5.31787	2.92234	1.05721e-22
RP11-82L18.2	1.46505	3.48731	1.32425e-22
Cabili_2240	5.13807	9.10391	1.32425e-22
RP11-347E10.1	1.05426	0.173205	1.50273e-22
LINC00519	1.46799	0.537585	1.82764e-22
RP5-1024G6.2	10.6119	7.45056	2.09051e-22
RP1-39G22.7	11.4281	7.87027	2.95131e-22
Cabili_1332	7.34083	3.45463	4.22683e-22
LINC01006	8.89654	4.40752	4.71291e-22
RP11-196G18.22	2.94181	1.48452	4.71291e-22
RP4-789D17.5	1.93155	1.09945	7.64157e-22
RP11-776H12.1	0.748429	0.32624	8.38291e-22
CTD-2085J24.4	3.30872	2.18781	1.19595e-21
RP11-54O7.16	1.66704	0.597742	1.68819e-21
RP11-345P4.9	19.8863	13.9711	1.87331e-21
FOXD1-AS1	11.721	2.48865	1.89307e-21
RP11-109P14.9	32.8621	22.2522	2.05407e-21
RP4-717I23.3	13.6953	7.62057	2.05407e-21
CACNA1C-AS2	0.988156	0.56	3.71862e-21
KDM4A-AS1	10.8107	7.02609	5.3723e-21
CTC-490E21.11	1.52691	0.807249	1.21591e-20
RP4-798A10.2	1.09678	0.68459	1.21591e-20
SNHG18	0.38088	1.01359	1.37342e-20
CTC-490E21.10	0.995482	0.634134	6.39772e-20
RP5-1031D4.3	1.76845	0.830664	7.10932e-20
RP11-124N14.3	114.397	42.9235	8.10241e-20
RP4-728D4.2	0.745749	0.40509	1.01033e-19
ARSD-AS1	1.64274	3.54003	1.59548e-19
RP11-195F19.30	0.342508	0.930872	1.72455e-19
RP1-167F1.2	1.34356	0.566649	1.72455e-19
CBR3-AS1	3.75103	5.57343	1.91586e-19
RP4-797C5.2	9.55596	4.50717	1.91913e-19
RP11-244H3.1	1.39369	0.869394	2.7265e-19
AC009005.2	1.46028	0.641054	3.00708e-19
Cabili_2847	0.374235	1.70421	6.62342e-19
SNHG11	7.25962	12.2232	6.62342e-19
AC002398.13	2.95277	1.90167	9.46793e-19
RP4-791M13.3	2.16903	1.15304	1.1427e-18
RP11-480C22.1	6.39829	3.16503	1.44782e-18
CTD-2152M20.2	1.24888	2.53685	1.78927e-18
KIAA1614-AS1	0.792206	1.37219	1.99141e-18
RP11-109P14.10	9.99653	6.71688	3.14562e-18
RP11-61L14.6	5.02228	13.4539	3.45115e-18
LINC01411	0.542501	2.08576	5.96199e-18
SNHG3	7.37399	4.76874	5.96199e-18
RP11-148K1.12	10.5695	7.17224	6.7896e-18
RP4-758J18.13	1.78823	1.15897	1.03724e-17
LINC00310	1.74787	0.774693	1.41848e-17
PCED1B-AS1	16.2692	7.82726	1.75051e-17
PTOV1-AS1	5.00155	3.29304	1.75051e-17
CTB-51J22.1	0.878421	1.72773	1.90559e-17
AC016738.4	0.525856	0.987901	2.06739e-17
LINC01088	127.948	36.2572	2.90806e-17
RP11-552M11.8	0.942784	0.619838	2.93887e-17
CTD-2012M11.3	2.41806	0.469818	3.2527e-17
CTD-2194A8.2	2.10489	0.876435	3.53991e-17
RP5-1074L1.4	1.46883	0.790661	3.89138e-17
FBXL19-AS1	0.366109	0.700951	4.8456e-17
RP11-350N15.6	1.33401	2.07292	4.8456e-17
RP11-231C18.2	1.52823	0.495815	5.37947e-17
RP11-344B5.2	2.60907	1.2425	5.93201e-17
LINC00853	0.523279	1.11128	7.3006e-17
RP11-109D20.2	4.49071	2.8291	8.04841e-17
LINC01128	7.70798	5.44022	8.08455e-17
RP11-817I4.1	0.570406	0.940961	1.10184e-16
RP11-318C24.2	0.710517	0.371864	1.66807e-16
AGAP2-AS1	5.1025	9.92295	1.66807e-16
RP11-341G23.4	1.03144	0.412965	1.66807e-16
RP11-135L13.4	32.148	46.1543	1.66807e-16
CTB-119C2.1	0.720256	1.54845	1.8286e-16
RP11-107F6.3	0.930686	0.649268	1.8286e-16
RP11-396C23.2	0.377978	0.749712	2.223e-16
KIF9-AS1	1.18165	0.834038	4.2504e-16
RP11-1105G2.3	1.03446	0.537561	4.69338e-16
LLNLR-268E12.1	1.66351	1.06162	6.22623e-16
Cabili_2167	2.38718	1.57429	7.60235e-16
RP11-15I11.3	0.898974	0.328464	7.60235e-16
RP11-506K6.4	0.763745	0.450308	7.60235e-16
LINC00960	2.29943	0.821035	1.02106e-15
RP11-733O18.1	0.692474	0.38159	1.27258e-15
RP11-363E7.4	0.816701	1.24696	1.38595e-15
RP1-111D6.3	2.61476	0.808848	1.52875e-15
RP11-54O7.3	2.81575	1.27306	1.68451e-15
CDIPT-AS1	0.337079	0.67654	1.68451e-15
RP11-436K8.1	1.39848	0.703389	2.31179e-15
GBM_LOC039120	0.914068	0.512958	3.09704e-15
ST7-AS1	3.65144	2.29529	3.09704e-15
RP11-185E8.2	4.33314	2.93101	3.37062e-15
FAM182A	10.0585	6.24294	3.73822e-15
RP4-614O4.11	1.13278	2.27524	4.13239e-15
RP11-264M12.2	3.4199	5.27406	5.6551e-15
LINC00906	1.16892	0.374143	6.15103e-15
RP11-98D18.1	1.70109	3.79855	6.83483e-15
MIR124-2HG	1.32157	3.01724	6.83483e-15
RP11-337C18.8	1.723	2.6698	7.45656e-15
RP11-152N13.16	0.487418	0.823295	7.50028e-15
HCG22	1.37906	0.414319	8.25905e-15
C21orf88	1.32815	0.743706	9.09365e-15
RP11-839D17.3	0.37842	0.759494	1.00115e-14
CTB-32O4.2	2.21081	1.46961	1.08825e-14
CTD-2267D19.3	0.421289	0.797799	1.08825e-14
LGG_LOC030946	1.29229	0.50281	1.20145e-14
GBM_LOC042318	0.510876	1.20708	1.20145e-14
RP11-158M2.3	18.5728	12.8088	1.4554e-14
RP11-834C11.4	6.44982	2.86195	1.4554e-14
AC006129.2	1.12726	0.582275	2.34597e-14
RP5-864K19.4	2.02182	1.29679	2.90738e-14
CTA-250D10.23	1.67994	0.941226	3.11961e-14
RP4-639F20.1	13.2886	9.19848	3.11961e-14
CTD-2510F5.4	2.40157	1.37252	3.11994e-14
AC003102.3	0.460316	0.828991	4.23355e-14
AC074212.5	3.36716	1.94443	5.0525e-14
RP11-455B3.1	0.348257	0.94742	5.0525e-14
RP4-635E18.7	0.937921	0.568514	5.43533e-14
RP11-328J6.1	2.57115	1.23406	6.0284e-14
RNF219-AS1	9.1653	3.94226	7.93998e-14
Cabili_2636	2.00021	1.22012	7.93998e-14
LINC00689	9.32155	1.33864	8.7726e-14
CTD-3220F14.3	2.58726	1.73205	1.29604e-13
RP11-64K12.4	3.70014	6.60127	1.30045e-13
CTD-2636A23.2	24.6163	43.4328	1.58433e-13
RP11-312B8.1	1.26003	0.751206	2.06636e-13
RP11-799B12.4	0.799416	1.42926	2.08586e-13
RP11-388P9.2	0.63071	1.3512	2.24753e-13
GBM_LOC026870	0.756428	0.300451	2.26882e-13
RP11-598F7.6	0.620783	1.72868	2.48833e-13
RP11-452F19.3	10.6494	7.27279	2.49716e-13
RP4-575N6.4	1.85956	1.18326	2.69832e-13
RP11-264A11.1	0.986321	0.305959	3.02945e-13
FZD10-AS1	0.383147	0.811316	3.28468e-13
RP11-549B18.1	1.49888	2.52325	3.54045e-13
RP11-61K9.3	1.84779	2.81976	3.54045e-13
RP11-337C18.10	1.23992	1.96491	3.55351e-13
RP11-143A12.3	0.464029	0.786651	3.86121e-13
CTB-147N14.6	2.58353	1.27994	3.8756e-13
WNT5A-AS1	0.702847	0.342218	4.73437e-13
RP11-159H10.3	1.30421	0.743098	5.10194e-13
RP11-489O18.1	1.51171	0.80578	5.10194e-13
RP11-365O16.3	1.27622	0.594644	6.0359e-13
GBM_LOC040061	0.282393	1.08572	6.04128e-13
AC002398.11	4.49496	3.00209	6.04681e-13
RP11-1049A21.2	1.03548	0.47149	7.23493e-13
AC083864.3	1.73896	0.671557	7.23493e-13
CISTR	0.465896	1.04667	7.3479e-13
Z83844.1	0.838838	0.587499	7.84023e-13
RP11-245J24.1	0.442084	1.39036	7.92486e-13
LINC01105	6.99407	13.5912	7.92486e-13
LINC01135	0.712425	0.459074	8.57896e-13
RP5-858L17.1	3.11806	4.4784	9.44876e-13
RP4-704D21.2	0.78291	0.424443	1.13788e-12
BAALCOS	4.71957	8.77863	1.24552e-12
RP11-96K19.5	1.83591	1.29746	1.35061e-12
RP1-293L6.1	0.867085	2.85574	1.35061e-12
VCAN-AS1	39.9404	24.6199	1.35061e-12
Cabili_1318	0.55651	1.09205	1.36387e-12
LINC01415	0.668103	1.27194	1.47132e-12
VLDLR-AS1	0.491555	0.870533	1.62389e-12
MIR7-3HG	0.830197	2.89927	1.7565e-12
RP11-499P20.2	2.34797	1.57541	1.9161e-12
HAS2-AS1	3.23927	1.90202	2.12604e-12
LGG_LOC046950	0.97936	0.461879	2.46756e-12
GRM5-AS1	1.21213	3.75092	2.49896e-12
AC009892.10	0.749955	0.430267	2.51646e-12
RP11-554A11.9	0.774064	0.43313	3.19713e-12
GBM_LOC006952	1.00957	0.679678	3.54933e-12
AC004837.4	0.739926	0.457408	3.84657e-12
RP11-486G15.2	1.80056	1.15857	4.14484e-12
RP11-215G15.5	0.566799	1.32443	4.1741e-12
RP11-21L19.1	14.8217	8.9624	4.1741e-12
RP4-622L5.7	1.86457	1.18293	4.58068e-12
SBF2-AS1	0.456462	0.834249	5.41389e-12
RP11-848P1.3	2.39251	1.43901	6.52195e-12
RP11-334A14.5	6.97816	3.63865	6.53152e-12
LINC00092	0.555991	1.26949	7.69175e-12
RP11-594N15.3	0.613197	1.04426	7.76806e-12
RP11-263K19.4	56.9301	39.6016	9.08282e-12
RP11-605F22.1	1.01092	1.69189	9.08282e-12
LINC01159	0.795036	1.24511	9.08282e-12
Cabili_2748	0.799802	0.46325	9.08282e-12
RP11-713P17.3	3.88847	6.26101	9.19875e-12
Cabili_1741	1.99037	2.90896	1.21052e-11
AC144449.1	0.625777	0.917408	1.29193e-11
LGG_LOC020514	0.651472	0.45083	1.53924e-11
RP11-83N9.6	0.826427	0.515118	1.69076e-11
RP6-65G23.3	0.583796	1.08607	1.80974e-11
RP11-42O15.3	0.813538	0.514553	1.80974e-11
RP4-785G19.5	0.696035	0.416697	1.82076e-11
AC091177.1	1.10217	0.635619	1.82076e-11
CTC-510F12.6	3.04021	5.72217	1.95439e-11
RP11-229P13.23	12.9567	25.4382	1.96312e-11
RP11-90P13.1	0.896455	0.487182	2.11512e-11
RP3-467L1.4	0.99054	0.631789	2.11512e-11
RP5-1119A7.17	1.77066	4.35273	3.01022e-11
RP11-1C8.7	0.760668	1.83493	3.01022e-11
NFYC-AS1	0.949122	0.652251	3.22714e-11
CTB-31N19.3	0.666412	0.416408	3.25928e-11
CTD-2527I21.4	0.387477	1.19592	3.57029e-11
AP000230.1	1.2613	2.09669	4.95238e-11
RP11-297C4.7	0.913297	0.63596	5.02837e-11
RP11-429B14.4	7.97295	4.0184	5.10556e-11
LGG_LOC007388	0.688441	0.446138	5.40682e-11
RP5-890O3.9	5.85295	4.09501	5.40682e-11
RP11-334E6.12	102.669	155.542	5.91281e-11
RP11-190A12.8	0.441299	1.08289	6.36914e-11
RP11-750H9.5	3.38226	1.74019	6.36914e-11
RP11-1263C18.1	1.46957	3.53651	6.36914e-11
AP000438.2	0.486882	1.12123	6.36914e-11
RP11-454H19.2	1.0883	1.72523	6.38114e-11
EXTL3-AS1	0.479666	0.775159	6.90833e-11
DKFZP434K028	1.62637	2.46008	7.4583e-11
SNAI3-AS1	2.69342	3.91033	7.4868e-11
RFPL1S	1.41985	3.20446	8.19024e-11
RP11-69E11.8	1.05016	0.708368	8.74676e-11
RP11-839G9.1	1.4245	0.775928	8.85729e-11
RP11-38L15.2	3.32359	2.26903	9.48342e-11
RP11-725P16.2	2.09437	1.19953	1.13229e-10
RP11-259K15.2	5.43849	2.86782	1.21197e-10
RP11-556E13.1	1.33964	0.690289	1.22644e-10
HAR1B	0.320258	0.720164	1.22889e-10
C10orf85	3.54434	1.95951	1.42245e-10
RP4-657D16.3	2.73072	1.78069	1.44329e-10
AC011524.1	1.38888	0.596859	1.53633e-10
AC005330.2	2.11256	3.49675	1.55162e-10
RP11-307C18.1	0.894369	0.539014	1.66608e-10
RP1-111D6.2	1.88914	0.703262	1.66608e-10
RP11-415J8.3	1.88997	1.16789	1.66608e-10
RP11-521C20.3	2.41871	1.34584	1.66608e-10
CTC-435M10.12	1.64675	0.979012	1.78252e-10
RP11-552D4.1	12.0961	6.2234	1.96046e-10
RP11-46F15.2	1.26154	0.796375	2.09158e-10
AP005530.2	0.77003	0.397792	2.28423e-10
RP11-517I3.2	25.2529	16.4428	2.50723e-10
RP11-116N8.1	4.20858	2.67466	2.72177e-10
AC114803.3	0.897409	2.64693	2.72751e-10
RP11-807H17.1	1.41833	0.423234	3.1407e-10
CTC-471F3.6	0.855183	0.443127	3.1474e-10
GBM_LOC039900	1.48257	0.695826	3.15413e-10
GBM_LOC047199	1.09885	0.522107	3.16909e-10
RP11-401P9.4	16.6053	10.4797	3.44961e-10
HAR1A	0.748335	1.46305	4.41492e-10
CH17-437K3.1	1.09127	0.710846	4.43574e-10
SNHG12	14.1995	9.41802	4.70146e-10
AC004540.4	44.8156	25.8181	4.70146e-10
RP11-8P11.3	0.939385	1.81673	5.17588e-10
GBM_LOC038759	0.403141	0.641414	5.61281e-10
AC007620.3	31.5648	20.8178	6.07263e-10
RP1-310O13.7	0.431142	0.614858	6.46968e-10
RP11-273G15.2	0.636752	1.22868	7.06959e-10
MIR223	1.3091	0.683023	7.56595e-10
AC097724.3	4.0187	2.36056	8.37046e-10
AC009404.2	0.647853	0.960794	9.02435e-10
RP3-428L16.2	5.16765	3.56372	9.56107e-10
STXBP5-AS1	0.615549	1.06573	9.65493e-10
RP13-977J11.2	0.884197	0.50817	9.72519e-10
Cabili_1476	2.31124	3.70807	9.77133e-10
GBM_LOC042831	1.60491	0.880982	1.05624e-09
RP11-597D13.8	1.82509	1.04806	1.1416e-09
RP11-71E19.2	0.899263	0.535078	1.21525e-09
RP1-257A7.5	15.3867	24.7069	1.23263e-09
RP11-285F16.1	2.45612	3.99806	1.23263e-09
CTD-2666L21.1	1.17529	1.89973	1.32159e-09
RP11-579D7.4	1.11485	1.61409	1.33455e-09
MLLT4-AS1	0.44702	0.862246	1.43109e-09
RP11-73C9.1	3.18793	1.67157	1.43431e-09
SATB2-AS1	0.684042	1.19218	1.53718e-09
RP11-359E10.1	1.82377	3.69965	1.6559e-09
AC009948.5	4.5923	6.62666	1.6559e-09
AC000032.2	3.97973	2.71745	1.68049e-09
SCOC-AS1	1.11481	1.71296	2.08851e-09
SLC6A1-AS1	0.881691	1.38122	2.08851e-09
LINC01114	1.43457	2.04406	2.08851e-09
RP11-48B3.4	1.26671	0.830669	2.08851e-09
RP3-523E19.2	1.01687	0.618956	2.09334e-09
Cabili_1378	1.9771	1.22517	2.22634e-09
Cabili_2207	0.918093	0.518105	2.22634e-09
RP11-74H8.1	58.4902	89.8305	2.25371e-09
RP11-441F2.5	3.38504	1.90795	2.3908e-09
LINC01094	21.2023	12.0493	2.3908e-09
AP001092.4	1.36328	1.93178	2.62517e-09
RP11-856F16.2	10.0327	6.81549	2.78472e-09
Cabili_523	1.09645	1.72412	2.7909e-09
NOVA1-AS1	1.9265	1.094	2.80406e-09
GBM_LOC006520	0.398425	1.02367	2.81069e-09
CTD-2325P2.4	1.21798	3.59148	2.98129e-09
RP11-6O2.4	17.2743	9.60024	3.50374e-09
AC004158.3	5.27973	7.73859	3.51208e-09
SNORD64	1.42778	0.825345	4.04594e-09
ISX-AS1	0.030713	1.25205	4.09539e-09
RP11-430G17.3	1.03439	0.639918	4.64769e-09
RP11-277P12.20	0.854352	0.502637	4.6702e-09
MIR181A2HG	1.3176	0.843562	5.15872e-09
LHX5-AS1	0.437727	2.96064	5.45429e-09
LINC00609	0.667929	0.398361	5.80849e-09
AC069363.1	2.77866	1.10183	5.80849e-09
GBM_LOC026352	0.459711	0.651888	5.8368e-09
CTD-3116E22.8	1.54534	0.785329	5.83693e-09
U82695.10	0.806385	1.40334	6.79569e-09
GBM_LOC028297	1.83543	0.433574	6.81232e-09
RP11-483F11.7	1.02933	1.47486	7.35807e-09
AC009303.2	0.974772	1.39893	7.90846e-09
LINC01351	6.73739	10.2948	7.92788e-09
TUNAR	0.352011	1.04165	8.43871e-09
LINC01102	2.59469	4.05159	8.5205e-09
CTD-2616J11.2	2.01769	1.10502	9.13328e-09
LINC01480	2.69558	1.53754	9.13394e-09
RP4-665J23.1	1.33657	2.97251	9.86083e-09
CTD-2235C13.3	0.584155	0.852079	9.86166e-09
RP11-31F19.1	4.36301	8.11418	1.05191e-08
RP11-375N15.2	0.486337	0.784065	1.14609e-08
RP5-1056H1.2	9.53584	6.16071	1.15178e-08
Cabili_2474	0.388846	0.615302	1.21656e-08
CECR7	0.700491	1.39023	1.21958e-08
LINC01341	1.70668	1.05829	1.30065e-08
CTA-373H7.7	2.57159	4.96266	1.41015e-08
IQCA1-AS1	0.692356	0.449811	1.41702e-08
SEMA3B-AS1	1.525	2.52839	1.51452e-08
BAALC-AS1	5.27994	7.87316	1.62191e-08
UG0898H09	20.3563	11.982	1.74489e-08
Cabili_2248	0.936796	0.587675	1.74926e-08
RP3-369A17.4	1.22409	0.563233	2.05724e-08
RP11-624G17.3	6.90879	11.0445	2.20747e-08
RP11-5C23.1	1.29021	1.99569	2.59972e-08
LINC00936	0.824464	1.27597	2.74937e-08
RP4-635E18.8	11.0173	7.76698	2.88772e-08
RP11-395B7.4	0.689293	1.56644	2.95599e-08
RP11-307B6.3	3.35629	5.49999	3.22109e-08
PYCARDOS	1.57224	0.917543	3.94851e-08
LLNLR-470E3.1	1.58166	0.923396	3.97797e-08
AP001350.4	1.32322	0.87729	4.18517e-08
RP11-352G9.1	0.624478	0.400729	4.2246e-08
FARP1-AS1	1.09499	0.755968	4.22622e-08
RP11-130L8.1	1.71951	1.10551	4.22622e-08
RP11-505P4.6	0.539961	0.90051	4.23764e-08
CRNDE	2.2276	1.10401	4.55387e-08
RP11-27M24.1	1.80461	2.60372	4.82328e-08
RP11-140A10.3	1.02816	1.6384	4.82653e-08
AL450992.2	0.369862	0.777326	4.82653e-08
RP11-446H18.6	0.758301	0.460313	5.11283e-08
LINC01141	1.16101	0.719213	5.16223e-08
RP11-65J21.3	0.520057	0.873887	5.45688e-08
AC005220.3	1.18579	1.97859	5.45827e-08
AC002451.3	1.58443	0.925904	5.50968e-08
CTD-2540B15.11	18.9931	11.9017	5.52665e-08
Cabili_392	1.025	1.59438	5.87866e-08
RP11-17E13.2	0.938309	0.592342	6.28093e-08
RP11-930P14.1	1.06611	0.618251	6.32559e-08
LINC01354	3.08537	1.99008	6.37058e-08
PAQR9-AS1	0.459311	0.813835	6.80746e-08
AC144652.1	2.30165	3.39298	7.78584e-08
GBM_LOC032075	0.696902	0.461969	7.82332e-08
CTD-2033A16.1	1.29679	1.88835	8.35446e-08
RP11-923I11.3	2.47921	3.91137	9.02409e-08
AC004019.13	0.743298	1.17541	9.61552e-08
EMX2OS	2.12857	3.819	9.61552e-08
HP08942	3.78268	5.72094	1.10332e-07
RP11-159D12.2	5.64366	3.89211	1.10332e-07
TBX2-AS1	10.8365	6.36951	1.19337e-07
AC092675.3	1.36208	0.811913	1.28312e-07
LINC00928	1.83366	0.974069	1.28352e-07
RP11-44M6.7	2.68854	1.71134	1.36077e-07
GBM_LOC009981	0.438632	0.685382	1.37379e-07
AC007319.1	1.16406	0.403803	1.44989e-07
BCYRN1	6.05705	10.9291	1.45729e-07
RP4-740C4.7	1.21435	0.812357	1.45729e-07
RP11-307C19.2	0.906622	1.5791	1.55951e-07
RP11-632P5.1	1.20514	0.43588	1.5635e-07
RP11-357K6.1	1.8981	3.13043	1.56404e-07
RP11-89G4.1	0.807478	0.512445	1.64983e-07
LINC01410	3.06764	2.06108	1.78416e-07
CTB-92J24.2	0.785497	0.545103	1.89615e-07
KCNK15-AS1	0.88698	1.505	1.90171e-07
RP11-588K22.2	0.431495	0.81372	2.03725e-07
DDX11-AS1	0.752533	1.1715	2.03801e-07
FOXD3-AS1	1.38733	0.484758	2.05224e-07
RP11-355I22.2	0.648801	1.34424	2.16951e-07
RP11-138I1.4	285.896	415.295	2.48376e-07
MIAT	3.57561	6.23556	2.48472e-07
RP11-161H23.5	8.73076	13.2236	2.49954e-07
AC002456.2	2.75334	1.91736	2.49954e-07
TINCR	0.979824	0.633818	2.49954e-07
JMJD1C-AS1	1.62799	1.09167	2.83932e-07
RP11-155G14.6	0.873384	0.561625	2.83932e-07
CCDC147-AS1	0.418407	0.717662	3.02747e-07
KCNMA1-AS1	0.785081	1.25582	3.20392e-07
VAC14-AS1	0.512354	0.843133	3.20392e-07
RP11-401P9.5	1.38939	0.809196	3.97683e-07
AC140912.1	0.871715	1.3967	4.52329e-07
GS1-72M22.1	0.957985	1.533	4.53495e-07
RP4-683L5.1	0.510947	0.864726	4.54665e-07
U91328.21	1.13989	0.713077	4.78829e-07
CTD-2176I21.2	0.856931	1.85485	4.80064e-07
RP11-231C18.1	19.0519	12.6046	4.8773e-07
LINC01431	1.55642	2.24618	5.12329e-07
CTB-129P6.7	1.27469	0.884281	5.12329e-07
RP11-472N13.3	3.7089	2.41356	5.12329e-07
XXbac-BPGBPG55C20.1	0.742963	0.465419	5.44072e-07
LINC00854	0.67179	0.459888	5.80441e-07
RP11-317P15.5	0.445217	0.898975	5.81941e-07
RP11-29H23.4	0.756963	0.451877	5.82476e-07
RP11-265D17.2	0.634848	1.01957	5.82476e-07
LINC00599	3.21174	6.14121	5.85227e-07
LINC00844	129.62	83.1344	6.25297e-07
FLJ16779	29.7943	19.7182	6.29577e-07
RP11-867G23.10	0.375821	0.744707	7.04414e-07
Cabili_2693	1.12652	0.523518	7.05082e-07
LINC00639	1.11813	1.85748	7.49904e-07
ST3GAL6-AS1	1.69236	1.02202	8.01605e-07
LINC01150	0.933056	0.559568	8.07844e-07
Cabili_2293	0.670022	0.314363	8.55793e-07
RP11-482M8.3	0.485272	0.829904	8.63423e-07
RP11-379F4.4	0.440472	0.833372	9.15013e-07
RP3-486I3.5	1.94999	2.86127	9.7066e-07
RP11-698N11.2	3.23509	1.79348	9.77242e-07
CELSR3-AS1	0.630611	1.16902	9.77726e-07
AC011558.5	10.7097	6.64186	1.10151e-06
RP11-706J10.2	1.17817	2.46497	1.10435e-06
RP11-156L14.1	0.532853	0.822782	1.43639e-06
ELOVL2-AS1	0.72297	1.09696	1.44381e-06
AP000688.29	0.392135	0.67792	1.52245e-06
RP11-864G5.3	7.00564	4.84417	1.52245e-06
RP11-147L13.14	0.729529	0.494413	1.71506e-06
XLOC_060036	0.692553	0.451251	1.72038e-06
CTD-2540B15.7	6.73756	4.3513	1.74349e-06
RP11-386I14.4	2.267	1.3632	1.93334e-06
RP1-232L24.3	0.890041	1.3817	1.93937e-06
GBM_LOC004789	2.20186	1.32342	2.07876e-06
NS3BP	1.87637	2.76907	2.08413e-06
LINC00957	0.696403	1.25526	2.08527e-06
RP11-66D17.5	0.691772	0.449897	2.173e-06
RP11-597M12.1	4.25977	6.92585	2.20328e-06
RP11-762H8.4	5.3609	9.61197	2.34541e-06
AF127936.5	1.34355	0.828456	2.50373e-06
RP11-662M24.2	2.8557	6.3476	3.20379e-06
Cabili_1493	12.5526	6.71271	3.40781e-06
Cabili_448	0.583726	1.00508	3.65021e-06
CH507-39O4.2	0.843518	1.20035	3.8662e-06
Cabili_1994	1.51475	1.01634	4.07598e-06
RP11-463C8.7	0.460478	0.698445	4.67211e-06
RP5-981O7.2	0.844975	1.20638	5.19481e-06
RP11-143K11.5	0.708821	1.18034	5.52217e-06
Cabili_1919	0.699274	1.03736	5.86271e-06
RP11-84C13.2	0.7969	0.56034	6.20301e-06
AC005754.7	0.75394	1.40197	6.46179e-06
FLJ35934	0.41337	0.64057	6.98059e-06
AC016757.3	0.597248	1.06997	6.9932e-06
RP3-326L13.3	12.3239	8.18621	7.43113e-06
RP11-809C9.2	0.848759	0.535156	7.43113e-06
RP11-337C18.9	0.500776	0.714247	7.45464e-06
RP11-317J10.2	1.20233	1.70236	7.91e-06
Cabili_2084	27.463	40.3844	7.91e-06
RP11-10L7.1	1.5092	0.817834	8.67766e-06
LINC01532	5.05518	2.82206	9.78865e-06
AC067969.1	0.783458	0.475412	9.83244e-06
RP4-625H18.2	1.33045	0.88538	1.03944e-05
RP11-702H23.6	1.27143	0.840824	1.04405e-05
RP11-74E22.8	4.77517	7.45595	1.04671e-05
RP11-656D10.3	1.06593	0.747273	1.04804e-05
RP11-219B17.3	0.873045	0.613477	1.0903e-05
RP11-362K14.7	1.88655	2.67418	1.10781e-05
CTC-548K16.5	0.908161	1.31219	1.17237e-05
GBM_LOC031096	3.33542	4.9225	1.17312e-05
RP11-732A19.9	0.781625	1.11966	1.23585e-05
CTD-2616J11.3	0.739576	0.498687	1.23671e-05
DLGAP1-AS2	1.66484	1.17496	1.23671e-05
CMB9-22P13.1	2.14829	1.50825	1.30264e-05
AC133785.1	1.30678	0.869842	1.45499e-05
LINC00320	4.90221	7.72032	1.47072e-05
RP11-439C15.4	2.57972	4.22525	1.48004e-05
Cabili_2928	0.915944	0.574811	1.54492e-05
RP4-545L17.11	1.30042	2.14392	1.54594e-05
CXorf28	0.721638	1.45596	1.62563e-05
AC012507.3	0.376982	0.660058	1.71796e-05
RP11-185E8.1	0.867452	0.493597	1.71796e-05
RP11-95O2.5	1.99431	3.15272	1.73876e-05
RP11-946L16.2	0.763447	0.440008	1.81434e-05
FAM201A	0.866799	1.39309	1.85677e-05
GBM_LOC012292	1.66219	0.671885	1.92516e-05
RP11-67L3.5	1.59254	2.66155	2.42335e-05
GBM_LOC002313	2.35351	1.26414	2.44795e-05
WDR86-AS1	0.538582	0.7748	2.58782e-05
LINC01485	1.35438	2.26476	2.72585e-05
CTD-2201G16.1	1.17695	2.251	2.73963e-05
LINC00087	1.8061	2.72884	2.87232e-05
CTD-2291D10.4	0.691135	1.05696	3.03604e-05
GBM_LOC008405	1.58792	2.27072	3.04927e-05
RP11-48G14.3	1.01753	0.658095	3.17664e-05
CTC-471J1.8	0.788167	0.525514	3.38773e-05
RP11-227B21.2	3.60048	6.51222	3.39006e-05
RP11-134K13.4	0.645698	0.964608	3.39859e-05
RP11-676J15.1	3.15791	2.19715	3.40094e-05
RP11-566K19.6	2.5379	3.6466	3.58705e-05
CTD-2521M24.9	1.3203	0.928594	3.58705e-05
RP11-334C17.6	7.21279	4.63969	3.72487e-05
GBM_LOC025187	2.05399	2.92196	4.0142e-05
RP11-299G20.2	0.802526	0.546339	4.20081e-05
RP11-158M2.5	1.07238	0.728657	4.21426e-05
RP11-1191J2.5	0.463908	0.657503	4.39041e-05
RP11-624M8.1	5.62883	3.81412	4.41729e-05
RP4-718D20.3	1.09119	1.59713	4.65664e-05
RP11-211G3.2	1.69949	1.12587	5.16045e-05
RP11-61I13.3	3.14265	1.98512	5.48514e-05
RP11-182J23.1	1.76611	1.0099	5.54208e-05
RNU6ATAC35P	0.604572	0.899027	6.42872e-05
RP3-460G2.2	0.725016	0.389035	6.42872e-05
MIR4674HG	0.628663	0.903356	6.791e-05
RP11-238F2.1	1.47012	0.945336	7.09221e-05
AC002429.5	1.72576	1.1349	7.12744e-05
RP11-809C18.3	0.591817	1.1232	7.13768e-05
SFTA1P	0.931914	1.32292	7.46377e-05
Cabili_2819	0.769643	0.465518	7.91482e-05
AC093642.3	0.483947	0.77947	7.96224e-05
RP11-320H14.1	1.02782	2.29941	8.40055e-05
PTPRD-AS1	3.21663	4.69743	8.85279e-05
GFOD1-AS1	0.881019	1.26824	9.23149e-05
RP5-1177M21.1	3.82145	2.10827	9.27702e-05
RP4-535B20.1	0.816123	0.57274	0.000102483
RP11-123O10.4	0.788775	1.64836	0.000103674
RP11-97N19.2	1.65088	2.50949	0.000107395
AC008746.12	0.631287	0.441878	0.000107552
RP11-323P17.2	1.1748	0.783377	0.000108268
PART1	0.533859	0.908348	0.000112808
SCARNA2	0.774716	0.516363	0.000126083
RP11-47I22.1	1.85705	4.01471	0.00012832
RP5-1007F24.1	3.07233	1.98186	0.000140395
KBTBD11-OT1	0.5648	0.812823	0.000140498
RP11-158M2.4	1.31371	0.890998	0.000146638
RP11-535M15.1	0.601031	0.948433	0.000156026
RP11-382B18.4	0.574405	0.820147	0.000179672
RP5-907C10.3	0.795621	1.24276	0.000180372
MIR4500HG	0.768067	0.504451	0.000189175
ZMYM4-AS1	2.31595	1.63507	0.000199465
LINC00652	0.960197	1.39576	0.000232211
AC015936.3	18.1621	11.9019	0.000245032
RP5-1028L10.1	0.324068	0.736266	0.000265958
AC007009.1	0.588192	0.848211	0.000282187
RAET1E-AS1	0.773766	1.10129	0.00028286
AC007292.7	1.04052	0.663965	0.000296087
RP11-701H24.7	0.704813	0.398904	0.000296526
SERTAD4-AS1	1.07085	1.55156	0.000309345
CTB-25B13.9	0.426845	0.615379	0.000328808
RP11-71N10.1	2.05624	3.04618	0.000375043
RP11-815J21.2	1.17924	0.79382	0.000379428
SERHL	2.74796	1.86357	0.000409998
Cabili_1401	0.868937	1.34573	0.000438337
SLC26A4-AS1	0.7682	1.36241	0.000438337
RP11-299G20.5	2.08376	1.45604	0.00048245
ITGB2-AS1	0.669396	0.4647	0.000485116
Cabili_450	0.690283	0.481594	0.000526945
RP11-122C5.3	0.690458	0.434658	0.000589224
FOXP4-AS1	0.415878	0.600852	0.000611291
CTD-2380F24.1	1.76314	2.50838	0.000616433
CTD-2062F14.3	0.537889	0.816241	0.000644953
LINC00839	3.49541	4.98985	0.000704539
RP11-946P6.4	0.456875	0.654532	0.000706154
GBM_LOC028295	0.680563	0.430025	0.000741947
RP11-861E21.1	1.28683	0.340057	0.000768234
RP11-236B18.5	1.2249	0.847143	0.000844268
RP3-395M20.12	0.528063	0.957562	0.00101649
Cabili_134	2.30062	1.54712	0.00127653
RP11-1191J2.2	0.610498	0.989044	0.00132705
CH17-140K24.7	1.35214	1.95712	0.00143688
RP11-11N9.4	1.71745	2.54314	0.00225668
AC062021.1	4.35776	6.56025	0.00267386
LINC00594	0.422457	0.60332	0.00277251
SNORD109A	0.919207	0.639486	0.00289504
RP11-383H13.1	1.26408	2.04184	0.00328894
CH17-140K24.6	2.12141	1.38454	0.00416884
RP11-145M9.4	5.65675	3.68077	0.00474575
EPHA5-AS1	0.590654	1.01518	0.00475906
CH17-360D5.2	0.930293	0.554133	0.00534194
Cabili_1079	0.603135	0.96632	0.0058281
RP11-123M6.2	0.732077	1.16797	0.0062457
AC005009.2	2.18011	3.35697	0.00671101
RP11-384O8.1	0.413058	0.604922	0.00675633
DKFZp434J0226	0.871738	0.485325	0.00880556
