# Supplementary material for: Expression of lncRNAs in Low-Grade Gliomas and Glioblastoma Multiforme: An In Silico Analysis
Source: PLoS Med. 2016 Dec 6;13(12):e1002192. doi: 10.1371/journal.pmed.1002192 (PMC5140055; doi:10.1371/journal.pmed.1002192)
Supplement: S5 Table — (XLSX) [file pmed.1002192.s008.xlsx]

## Sheet: IDH mut
lncRNA	Type1_median_FPKM	Type2_median_FPKM	Type3_median_FPKM	Type1vType2_FDR	Type1vType3_FDR
KCNK15-AS1	1.58254	0.913869	0.727584	2.0076e-11	2.69365e-09
AC005754.8	1.37557	0.797235	0.408726	5.47816e-05	3.01383e-11
AP001092.4	2.32301	1.37645	1.11478	2.15323e-16	2.96254e-10
AC009120.5	1.03947	0.72757	0.628027	2.21175e-06	1.07977e-06
U91328.19	1.51018	1.05237	1.17946	9.28593e-08	0.00552631
MCM3AP-AS1	2.21828	1.53704	1.12243	1.68721e-07	1.45166e-10
CTD-2026K11.4	6.98452	5.96927	5.06098	0.00011733	2.90691e-06
CTD-2026K11.5	0.660292	0.517008	0.433788	0.00102016	0.00140551
RP11-454H19.2	2.01512	1.0959	0.750349	2.52581e-22	8.91301e-20
RP11-651L5.3	1.10743	0.956456	0.757248	0.000874724	4.49664e-08
AC003665.1	2.78908	2.33674	1.67946	0.000173327	2.6348e-11
RP5-1050D4.5	1.98965	1.67009	1.4651	0.00690689	0.00154509
CISTR	1.53069	0.490706	0.365629	2.86662e-26	3.74244e-16
CTA-250D10.19	2.69339	2.08382	0.991958	0.00206661	4.568e-09
RP11-123O10.4	2.17816	0.797492	0.00486535	4.45716e-09	6.41542e-10
LGG_LOC019760	0.835305	0.538536	0.413673	3.21703e-09	9.33456e-11
RP11-158I9.8	2.07281	1.63608	1.17683	5.47649e-07	3.93259e-14
RP4-769N13.6	2.90892	2.20369	1.95457	0.000423979	0.000296467
RP11-412D9.4	1.96985	1.77061	1.233	0.00137452	1.36007e-09
FZD10-AS1	0.967402	0.383947	0.640661	1.31278e-16	0.0031805
CTD-2270P14.5	2.49286	1.87972	0.746115	0.000844756	2.02848e-24
LINC01102	5.98444	2.54273	2.65523	6.08365e-23	8.51379e-15
LINC01105	19.5783	7.37734	6.2181	2.56925e-23	5.16139e-14
RP11-546K22.3	0.882656	0.699679	0.679246	0.000129265	0.0010455
Cabili_247	0.908415	0.71329	0.616033	0.000326504	3.77869e-06
TUG1	32.5053	25.8709	22.7356	0.00239007	0.00134829
Cabili_242	0.797559	0.536296	0.380636	0.00452761	7.22562e-05
RP11-538I12.2	15.1972	13.4053	13.7059	3.09245e-05	0.00647562
RP11-483F11.7	1.89962	1.0247	0.738582	1.07934e-17	4.24144e-11
Cabili_2123	14.5922	12.5869	9.92595	0.000185679	7.38381e-11
Cabili_2121	0.639989	0.518065	0.411393	0.000224127	6.00617e-07
GBM_LOC025565	0.957936	0.584163	0.341348	2.44045e-15	1.82659e-18
RP11-758H9.2	6.09502	4.85095	3.08732	5.16348e-06	1.35028e-17
SRD5A3-AS1	1.99162	1.64849	1.66817	9.83182e-05	0.00286135
RP11-423P10.2	0.719697	0.59043	0.592627	0.000430926	0.00540653
RP11-797D24.4	7.46835	5.01231	3.20343	1.61221e-12	1.10381e-16
PVRL3-AS1	1.32801	0.826701	0.482141	2.85171e-10	8.40921e-15
RP11-382B18.4	1.00553	0.59522	0.470395	5.53457e-07	1.70899e-07
PTPRD-AS1	5.47408	3.18231	3.15179	2.13092e-08	0.000168133
RP5-1068E13.7	2.08785	1.52703	1.14024	1.02616e-08	1.57067e-11
RP11-579D7.4	2.05747	1.04083	0.918189	9.85471e-22	1.72333e-11
GBM_LOC037116	1.10316	0.803012	0.382779	5.9771e-06	8.6678e-18
CTB-58E17.5	0.963409	0.747719	0.485498	5.59119e-05	5.82102e-10
RP11-307B6.3	7.68788	3.43366	2.10738	2.85447e-19	6.58724e-22
CTB-58E17.9	0.765698	0.486001	0.41831	1.56128e-07	1.31719e-07
GBM_LOC009263	0.738259	0.535738	0.59077	3.3067e-05	0.00525804
RP11-8P11.3	2.57097	0.947014	0.811358	9.50245e-21	4.3278e-15
AC107081.5	9.59103	8.15972	7.29336	0.00147333	3.48991e-05
AC144449.1	1.05038	0.62792	0.70072	3.106e-16	3.20423e-08
LL22NC03-2H8.5	0.790605	0.492596	0.259983	1.31591e-06	5.63493e-15
CTC-205M6.1	1.49255	1.16079	0.957812	9.05638e-05	3.97853e-06
LINC00894	1.26842	0.932633	0.700342	0.00502768	7.04807e-05
RP11-700J17.2	3.96188	3.14135	2.93275	2.18817e-06	1.83104e-06
SLC25A21-AS1	4.87519	3.21099	0.461606	1.87926e-15	4.5553e-34
RP11-685M7.3	0.886803	0.691775	0.541143	3.35671e-07	1.34641e-10
LLPH-AS1	1.31787	0.81582	0.666364	2.2487e-05	2.94512e-05
RP11-455F5.3	4.83838	3.9378	2.98247	7.68238e-06	1.46963e-15
RP13-941N14.1	1.39719	1.04401	0.843199	1.54445e-05	3.04825e-07
RP11-1055B8.3	6.15191	3.94794	1.4784	0.000689664	1.27384e-16
PXN-AS1	13.4179	10.9336	10.6907	3.9511e-06	0.000871502
FLJ21408	0.710907	0.564463	0.375416	0.000150114	6.94097e-09
RP1-257A7.5	26.9177	15.6029	13.3749	3.9218e-12	5.17372e-08
RP1-257A7.4	2.15044	1.50277	1.21952	5.75282e-07	2.26315e-10
CTD-2545M3.8	4.66815	2.49774	1.27496	2.52443e-06	1.26383e-17
Cabili_102	1.77146	1.54858	1.31707	0.00216908	1.87994e-05
RP11-134K13.4	1.04998	0.683278	0.621339	7.84627e-06	9.00771e-06
RGMB-AS1	3.27738	1.83479	1.58381	1.63904e-21	1.17661e-18
LA16c-325D7.2	0.971975	0.61781	0.508943	2.55768e-09	5.7237e-08
JHDM1D-AS1	3.03044	2.55783	2.26298	3.56453e-05	3.58021e-06
NCBP2-AS1	1.81436	1.4359	1.43603	2.63488e-07	0.00135855
NCBP2-AS2	24.1963	19.5592	20.058	3.35613e-09	5.48778e-05
U47924.30	7.72292	7.02544	5.67298	0.00465119	5.33694e-09
RP1-266L20.2	2.83675	1.89571	0.945157	1.69466e-12	5.7428e-22
RP11-389C8.3	2.39361	2.15454	1.785	0.00985251	0.000224685
RP11-95P2.1	1.64483	1.36298	0.962875	0.000481181	3.17143e-08
CH507-39O4.1	1.04775	0.586716	0.449306	1.5688e-12	6.44615e-12
CH507-39O4.2	1.47157	0.835664	0.731568	2.90988e-13	1.07794e-10
RP11-231G3.1	1.38173	0.983248	1.00202	1.73263e-07	0.00428549
OCIAD1-AS1	1.68004	1.35155	1.32618	0.0027115	0.00121675
ST3GAL5-AS1	0.975697	0.611794	0.604178	1.18291e-07	1.25196e-07
AC109333.10	0.752429	0.578188	0.561731	1.24131e-06	6.2013e-05
AP000648.5	0.904985	0.768704	0.645025	0.00630575	0.000296467
RP11-454E5.4	5.32749	3.11694	2.64732	1.49457e-27	6.51823e-23
RP11-572O6.1	0.936593	0.585445	0.390772	4.78297e-08	1.16669e-08
FLJ37035	5.49369	3.95794	2.98414	5.73026e-17	1.76365e-20
RP11-266L9.8	6.76089	5.39912	5.03294	0.0007382	0.000815989
RP5-1021I20.8	5.79835	4.3868	3.08239	0.00754351	2.68919e-06
RP11-279F6.1	3.39428	1.61263	0.658393	2.62198e-21	4.18331e-34
CTD-2260A17.2	1.84813	1.36246	1.33915	7.36323e-09	2.57631e-06
RP11-104H15.7	1.11846	0.897433	0.627133	0.00997623	2.04727e-07
MLLT4-AS1	1.08331	0.472782	0.573456	1.54674e-16	3.63047e-05
LGG_LOC033929	1.06073	0.676933	0.623883	5.0166e-14	4.14736e-07
LINC00643	7.85343	3.75925	1.71541	3.91828e-05	7.15537e-10
AC000068.9	4.07672	2.97062	2.07809	3.00012e-06	3.49961e-15
RP5-1119A7.17	6.00017	1.93106	0.405932	1.23781e-21	3.39222e-23
AP000255.6	1.04285	0.821892	0.430575	0.00328356	9.68039e-15
AC000068.5	0.922755	0.6477	0.384866	9.18133e-07	3.42688e-16
RP11-523H24.3	3.94915	3.37851	2.87143	0.000580852	2.88706e-05
RP11-677M14.7	1.31951	0.899416	0.717373	3.4241e-08	1.85064e-08
CPB2-AS1	2.82288	1.7739	1.62414	1.75124e-12	6.00248e-09
ZNF213-AS1	14.1347	9.72269	7.79009	1.17397e-13	1.37197e-18
RP11-350N15.6	2.23021	1.32056	1.60176	3.12781e-26	2.37402e-07
RP5-965G21.6	0.961954	0.573507	0.61345	1.37869e-13	1.07977e-06
RP11-452L6.1	3.29276	2.66161	1.97157	4.49423e-06	1.05734e-15
RP11-452L6.7	2.72033	2.00781	1.32519	2.36765e-05	5.47774e-13
Cabili_340	4.72555	3.03589	2.50792	2.18803e-08	1.8086e-09
RP11-452L6.5	1.26398	1.03365	0.846318	5.29475e-06	1.06365e-08
LINC01063	2.67036	2.15337	1.64682	0.000250692	5.51181e-08
RP11-713P17.3	8.2914	3.80437	3.13189	5.35825e-28	1.76166e-19
RP11-21A7A.3	13.6494	9.85458	5.11329	1.56277e-08	7.57205e-20
RP11-21A7A.2	9.07869	6.02157	2.72973	4.82415e-06	5.65249e-16
AC004158.3	11.1112	5.16918	4.51682	2.37001e-22	4.64429e-17
FAM66D	1.34086	1.03177	0.876156	2.41828e-05	2.25544e-06
Cabili_761	1.14196	0.750852	0.672643	0.000184529	0.000921325
XXbac-B135H6.18	1.55415	1.21718	0.931339	0.000332434	5.13959e-09
Cabili_1171	1.58133	1.29037	1.16885	0.00251507	0.00277179
RP11-411B10.3	1.49211	1.22905	0.870522	0.00240757	1.05566e-09
AC068057.1	6.30973	0.466761	4.24249	3.78593e-59	0.00444793
RP11-18I14.11	1.3113	1.06755	0.784854	0.00113993	1.70535e-10
RNF157-AS1	6.93463	5.39499	3.3796	8.71579e-05	2.38869e-13
LL22NC03-N14H11.1	2.12639	1.46907	0.871533	0.000492967	5.29588e-06
LINC00938	4.30207	3.02901	2.163	2.44662e-13	2.6922e-20
AP001469.9	2.53653	1.73197	0.91376	1.09592e-09	1.37921e-21
LINC00937	5.47492	3.77912	3.92078	6.09705e-12	8.68334e-06
RP11-588K22.2	0.922806	0.471943	0.550847	4.00415e-06	0.00714588
CTC-338M12.5	1.3122	0.931825	0.812191	1.69017e-07	2.51316e-07
CTC-338M12.4	5.47589	4.68577	4.60165	0.000794581	0.00933056
AC003102.3	1.15045	0.471154	0.306184	9.46908e-28	8.94569e-27
RP11-731C17.2	1.65064	1.40504	0.92938	0.00684816	4.94448e-12
RP11-290L1.3	107.358	63.0025	32.1038	2.03803e-09	1.86625e-12
RP11-290L1.2	0.789099	0.509279	0.28416	8.27387e-07	1.6472e-13
XLOC_064286	0.719506	0.59136	0.487638	0.000800901	5.56831e-06
RP11-551L14.4	4.30073	2.36555	2.17348	1.08767e-11	1.22351e-10
RP11-111M22.3	15.3897	10.7554	10.2464	1.57709e-17	8.60318e-14
RP11-23P13.4	7.81061	6.45689	6.69679	2.36765e-05	0.00209616
CTD-2547G23.4	1.13546	0.887225	0.638358	0.00477853	2.07657e-08
SCAMP1-AS1	8.6158	5.74186	6.91417	2.70084e-19	0.000604506
CTD-3064H18.4	0.990264	0.694019	0.1867	0.0094846	5.81092e-22
AC002401.1	1.73503	1.27144	1.28959	4.88088e-05	0.000203142
GFOD1-AS1	1.50294	0.919692	1.02852	3.60632e-05	0.00444793
RP11-98D18.9	3.442	2.36723	1.51261	4.14521e-11	9.34784e-18
Cabili_1741	3.57004	1.96694	2.06095	9.86954e-22	2.70758e-12
Cabili_1038	2.66742	1.97697	1.16117	2.2061e-08	1.29658e-20
TNK2-AS1	0.873611	0.600953	0.420357	5.04554e-06	3.9956e-11
RP11-98D18.1	4.83996	1.75925	0.877519	4.17836e-26	5.68833e-20
RP4-718D20.3	2.05011	1.11351	1.0596	2.80653e-10	1.1945e-07
LINC00652	1.93853	0.909573	0.723917	4.81679e-20	5.64258e-18
RP11-295I5.3	1.16629	0.92327	0.94785	2.37374e-06	0.000692218
LINC01278	23.3155	16.8476	16.0739	8.0973e-10	5.70016e-09
RP3-333H23.9	4.42608	2.50514	1.86715	1.53848e-14	9.84038e-16
RP5-984P4.6	2.57088	1.79708	1.08546	0.000197332	4.01109e-09
RP11-64K12.4	7.54731	3.71952	3.47361	9.33935e-21	7.32677e-11
KB-1125A3.11	0.638826	0.498464	0.324616	9.35036e-05	1.78482e-09
RP11-301O19.1	2.9266	2.28946	2.04554	0.00611369	3.02609e-05
FLJ35934	0.941894	0.415269	0.324933	1.00794e-16	8.84683e-17
EPB41L4A-AS1	85.5808	56.2274	32.8841	2.36778e-14	2.83942e-31
AC131056.3	1.49355	1.26978	0.804157	0.00123147	4.0682e-06
RP11-149I23.3	1.9778	1.37276	0.951257	1.47722e-06	1.24646e-12
RP11-257O5.2	3.86637	2.46973	2.53002	1.06542e-17	1.98001e-11
Cabili_195	0.756011	0.602361	0.481568	1.72877e-05	3.43756e-12
AC002310.12	2.0401	1.78159	1.21823	0.00364393	5.41634e-14
RP11-338N10.2	0.678709	0.49784	0.374063	0.00100298	0.000158347
Cabili_1927	1.40989	1.04944	0.443844	5.26842e-07	7.44654e-21
RP11-46C24.7	5.03432	4.13681	2.85018	6.80207e-05	3.31574e-18
TOB1-AS1	3.03561	2.0732	1.40776	3.85607e-16	1.10001e-24
Cabili_2679	5.45748	4.47546	3.81083	1.89646e-09	7.38381e-11
Cabili_2859	3.91818	2.86436	2.44798	1.185e-07	4.1919e-07
RP4-584D14.5	1.69009	1.34767	1.27491	2.34183e-05	3.78144e-05
RP11-46H11.3	0.732743	0.539913	0.167593	1.61811e-07	6.60617e-20
SLC6A1-AS1	1.60933	0.886734	0.966051	4.60598e-12	5.51778e-06
CTD-2026G6.3	1.8958	1.23128	0.7993	0.00121202	3.97853e-06
LINC00320	9.2206	5.29639	4.17192	2.23226e-08	1.6906e-09
RP11-714G18.1	0.759378	0.618767	0.296576	0.00818366	1.87999e-13
RP11-245J24.1	1.98002	0.542363	0.286223	1.22405e-14	1.8075e-10
XX-FW83563B9.5	1.34068	0.800874	0.858498	1.69862e-11	9.77698e-08
LA16c-380H5.5	2.43805	1.82106	0.909834	1.00114e-05	2.16807e-15
RP1-63G5.5	1.06227	0.745355	0.249546	0.00570734	1.01653e-14
CHKB-AS1	0.847753	0.643577	0.657946	2.27601e-07	0.00165554
RP11-256I23.2	11.7747	7.49641	6.22728	2.52261e-11	2.23391e-13
RP11-256I23.1	1.51668	1.16852	0.874206	0.000372945	6.83468e-07
RP11-594N15.3	1.183	0.605303	0.770645	8.93328e-19	8.4098e-05
GBM_LOC012243	2.76384	2.11611	1.93761	6.42853e-08	7.65714e-06
AC062029.1	0.835424	0.615348	0.606997	8.58285e-09	7.65714e-06
RP11-303E16.3	2.23077	1.7455	1.33544	0.00355159	9.22129e-07
RP11-463C8.7	0.997151	0.478157	0.153754	5.03376e-13	2.58335e-22
CTB-187M2.2	5.63435	3.3596	2.56435	2.13701e-17	1.35028e-17
RP11-144G6.12	2.69438	2.14716	1.42353	0.000185679	3.77e-11
RP11-480A16.1	2.26979	1.61831	1.60475	1.9337e-07	5.35042e-07
CTD-2574D22.4	2.42901	1.70557	1.97876	1.84611e-16	8.81791e-05
RP11-328C8.4	3.61259	2.87676	1.89034	0.00998846	3.35232e-05
RP11-141C7.4	1.24853	0.861346	0.810322	4.98252e-06	5.84523e-05
CTD-2176I21.2	2.52353	0.915477	0.588398	1.90732e-12	1.26657e-13
ILF3-AS1	30.6073	23.3654	17.981	5.08191e-09	1.20787e-15
AC069513.4	0.958115	0.80283	0.596951	0.00513565	1.0599e-05
Cabili_1318	2.15729	0.55512	0.255249	3.23058e-31	7.25322e-25
LINC01268	2.99036	1.577	1.35546	1.84577e-12	1.1814e-07
LINC00672	12.2802	10.4346	3.36314	0.00679367	7.44654e-21
MIR8072	2.89819	2.04046	2.14099	2.92819e-08	0.000315111
ISX-AS1	2.15427	0.323691	0.00685388	9.48734e-18	1.00344e-18
RP11-47A8.5	2.18911	2.08418	1.34162	0.00979904	2.31093e-09
Cabili_360	2.52119	0.192873	1.24943	3.43746e-35	0.00334798
RP11-98I9.4	2.26943	1.4343	1.13731	1.8079e-10	3.04204e-09
RP11-169D4.2	1.11159	0.66274	0.27089	4.11562e-07	1.39531e-14
VPS9D1-AS1	1.38029	1.00464	1.02171	1.87356e-05	0.00320326
RP11-285F16.1	4.95732	2.45043	2.31756	7.43749e-14	4.76856e-07
RP11-326C3.7	2.62249	2.53087	1.47335	0.00424984	1.38713e-05
RP11-434B12.1	2.04834	1.43677	1.20513	3.91828e-05	5.22879e-07
NNT-AS1	14.4372	10.6613	10.0527	8.11531e-13	1.1556e-10
HCG25	0.763095	0.605998	0.509993	3.41909e-05	2.54882e-05
RP11-755B10.4	2.17309	1.69213	1.23622	2.07207e-05	2.58643e-09
PPP3CB-AS1	18.4008	14.3523	8.22067	3.44824e-06	3.47997e-16
AL161668.5	2.98318	2.30147	1.14179	0.00200928	3.3059e-13
RP11-799D4.4	0.975318	0.659088	0.494976	1.81319e-15	7.98435e-15
Cabili_2847	3.10225	0.393383	0.528482	1.56235e-33	9.45358e-20
RP11-341N2.1	1.6142	1.03506	0.634837	1.34882e-05	1.79672e-15
RP11-74E22.8	10.0118	5.1769	1.95473	9.48734e-18	1.18579e-26
RP11-133F8.2	2.99925	2.08347	1.00448	0.000352926	1.17314e-09
RP11-64K12.10	0.81807	0.520109	0.299401	2.21846e-05	1.21474e-08
RP13-1032I1.7	20.8199	18.4407	17.3938	0.00723475	0.000836291
RP11-74E22.5	77.9691	70.3961	62.7995	0.0002076	9.00771e-06
RP11-317G6.1	0.914922	0.680874	0.517022	0.00622	0.000312329
RP11-318M2.3	341.904	234.693	241.934	1.63042e-09	8.68334e-06
RP11-75I2.3	3.68635	2.2153	0.831963	7.33045e-06	3.02537e-18
RP1-293L6.1	4.64058	1.00635	0.173956	3.23058e-31	2.03974e-34
RP5-858L17.1	4.98523	3.08835	3.8028	3.57188e-16	0.00493336
AC009133.12	65.251	56.6912	50.604	3.49108e-05	5.74088e-05
LINC00910	0.9295	0.689287	0.676979	4.00415e-06	0.000187513
RP11-297D21.4	1.28255	0.978367	1.12403	3.6158e-09	0.00926997
RP11-273G15.2	1.32424	0.653139	0.844917	3.46091e-12	0.000901554
RP11-400F19.6	8.10511	6.98606	6.37387	0.000484737	6.90996e-05
AC113189.5	21.3703	14.4134	10.4828	1.3972e-13	2.82911e-15
RP11-182J1.13	2.78596	2.04356	2.06446	4.46443e-08	0.00145017
RP11-756G20.1	0.789744	0.401285	0.433291	2.13233e-14	1.37907e-07
TUNAR	1.33537	0.377101	0.340178	2.40938e-11	2.04727e-07
TFAP2A-AS1	2.20164	1.27477	1.05586	5.13289e-10	8.46543e-08
AC053503.11	5.89513	3.57724	0.780089	1.19532e-06	2.03974e-34
FAM201A	1.83357	0.944591	0.479805	1.42437e-06	1.2794e-10
RP1-253P7.4	1.52064	1.06488	0.85243	0.000301741	0.000328799
FLJ42627	4.23594	3.20666	2.24525	2.18803e-08	4.70741e-19
RP3-525N10.2	21.1139	17.2613	9.94725	0.00465119	5.41634e-14
RP11-20E24.1	0.906211	0.634737	0.54967	2.1919e-06	4.44546e-07
CTB-129O4.1	2.66708	1.75813	1.13344	4.22898e-08	2.06579e-14
RP11-519G16.2	0.923925	0.736438	0.626583	0.00438418	0.000122505
RP3-518E13.2	35.1869	15.9437	6.0093	1.48104e-21	5.38672e-26
PAN3-AS1	2.38787	1.81283	1.47978	7.86129e-10	3.5629e-11
RP3-395M20.12	1.52409	0.552757	0.416154	1.90411e-08	1.30183e-11
AP000487.6	0.911414	0.784052	0.678328	0.00587597	2.57631e-06
AL136419.6	2.49309	2.18692	2.00648	0.00942641	0.000353062
RP11-355I22.2	1.73605	0.683397	0.628425	7.73891e-10	5.7237e-08
CTD-2410N18.4	2.17616	1.83313	1.53347	9.00897e-06	1.17314e-09
AC009404.2	1.30874	0.626877	0.782569	6.54355e-22	2.1841e-06
LL09NC01-139C3.1	1.35678	0.769255	0.498547	2.18803e-08	6.92211e-13
GBM_LOC038759	0.724971	0.417872	0.445313	9.50896e-12	4.90369e-06
LINC00173	2.19471	1.7301	0.929185	0.00117129	2.18415e-09
LINC01415	1.63996	0.663453	0.789999	4.55279e-21	8.5559e-10
RP1-104O17.1	2.27081	1.59626	1.44439	6.83218e-06	0.000152529
AC079305.11	2.14991	1.15683	0.0514684	7.91075e-09	1.63139e-43
LRRC75A-AS1	599.102	495.772	273.269	1.67468e-05	7.12991e-22
Cabili_1781	0.705611	0.616325	0.53852	0.00602013	2.9387e-06
RP11-923I11.3	4.95559	2.53681	1.98531	1.78699e-11	3.44351e-10
MIR219A2	10.6233	6.89906	1.88977	2.32221e-05	4.00717e-17
XXbac-BPG299F13.17	1.77029	1.09072	0.925814	1.36951e-11	4.75521e-11
RP11-337N6.3	1.68914	1.39285	1.09232	0.00166927	2.38447e-06
MYCNOS	1.94094	1.40296	0.935576	1.25078e-05	1.38789e-12
RP11-571M6.17	5.15339	4.03882	3.82987	7.90257e-12	1.88418e-09
MIR7-3HG	3.86138	0.886944	0.803782	1.949e-16	3.72332e-11
Cabili_378	1.70321	1.10692	0.716935	2.29026e-10	1.09757e-14
RP11-517B11.7	0.846459	0.718686	0.665803	0.00323229	9.61874e-05
TOPORS-AS1	17.0499	15.3223	13.4274	0.00336142	8.56004e-08
Cabili_2279	1.90926	1.55956	1.29973	0.000255689	8.60878e-07
LINC00237	12.4705	7.67098	2.26322	4.763e-11	5.15294e-23
LL0XNC01-7P3.1	0.800654	0.57822	0.51581	4.21655e-07	2.66346e-11
RP11-96H19.1	4.78979	2.87673	2.57222	6.91678e-14	5.89059e-11
GBM_LOC014495	5.73745	2.76063	1.82441	1.21529e-16	1.87356e-21
RP1-239B22.5	2.48886	0.934364	0.778415	7.22367e-33	1.53947e-19
SEC24B-AS1	1.65547	1.31845	1.20887	9.62609e-07	1.89273e-06
RP11-388C12.8	0.79874	0.55447	0.472242	2.49268e-05	9.87588e-07
Cabili_392	1.86801	1.05554	1.12376	2.23141e-09	3.94508e-06
LINC00342	5.33333	3.99196	3.45122	0.00286912	0.000128097
ENTPD3-AS1	6.78477	6.17666	5.98642	0.00149973	0.00130657
RP11-82L18.2	4.22759	1.47844	2.91181	2.12807e-21	0.00624044
RP11-445N20.2	2.36987	1.81742	1.33778	0.00010247	4.28055e-08
AF131216.6	1.74744	1.40184	1.27086	0.00101153	0.000159711
RP11-73K9.2	1.16349	0.999408	0.862449	0.00133809	0.000388884
AC006538.1	2.34888	1.74218	1.8984	1.87631e-08	0.000257454
RP11-1081L13.4	3.27549	2.30958	1.46155	7.7569e-15	1.73117e-21
AC005220.3	2.41379	1.10894	1.23091	2.78427e-17	2.64363e-10
RP11-47I22.1	7.86659	2.29986	0.734622	1.00171e-10	9.49272e-18
AC079630.4	0.848579	0.552175	0.569164	9.13172e-10	0.00132728
RP11-446F17.3	1.454	0.891817	0.548936	4.19578e-11	1.52959e-20
RP1-267D11.6	4.77899	3.60796	3.49828	1.73152e-09	3.4348e-07
BRWD1-AS2	0.905243	0.567806	0.51863	1.11658e-14	1.10172e-09
BCDIN3D-AS1	1.0288	0.785398	0.665566	9.36413e-08	3.19379e-09
RP11-314A20.2	0.99291	0.727192	0.665359	2.85299e-05	5.74088e-05
RP11-398C13.6	1.78268	1.46212	0.692172	8.95572e-05	1.79269e-27
ACVR2B-AS1	0.756837	0.639534	0.368262	0.00213848	1.32505e-12
RP11-505P4.6	1.20521	0.519928	0.50928	1.68156e-19	7.12137e-14
GBM_LOC039128	0.648312	0.439072	0.341134	4.55833e-07	2.25845e-07
RP11-79P5.9	2.77193	2.18009	1.69805	1.6717e-06	2.02716e-10
RP11-295H24.4	1.97028	1.62253	1.3261	4.93733e-05	2.60571e-07
RP11-574K11.32	18.8144	16.3482	11.4886	1.41446e-05	1.90434e-19
RP11-258C19.7	6.36177	4.95395	2.89601	0.000197332	1.66608e-17
RP11-9G1.3	2.22331	1.56016	1.51004	5.04905e-06	0.000775047
RP11-334E6.12	163.274	103.778	106.514	7.67113e-12	4.20473e-06
CTD-2650P22.2	0.827442	0.572502	0.622599	6.37856e-09	0.000239606
RP11-708J19.1	1.66738	1.09389	0.994071	1.35917e-13	2.88212e-12
CTD-2560E9.3	1.2046	0.944168	0.708696	0.000646874	2.88212e-12
ZNF32-AS2	1.66458	1.41545	0.812623	0.00226387	5.60565e-12
ZNF32-AS1	44.4003	34.7927	24.623	8.15808e-14	2.01909e-25
GRM5-AS1	4.33379	1.47245	1.95907	1.08891e-12	0.000169681
AC025165.8	7.51701	5.59093	4.84119	4.92524e-06	2.33277e-06
LINC00599	8.67838	3.389	1.05413	2.06727e-16	2.58229e-23
RP11-64D24.2	0.82016	0.611638	0.510993	0.00494025	0.000409841
RP5-1028L10.1	0.802941	0.313924	0.37608	6.36974e-05	0.00392145
CTD-2349P21.9	3.88775	3.37528	2.85134	0.00728039	3.22641e-05
TMCC1-AS1	4.34924	2.96655	1.9856	1.02954e-09	6.30262e-17
LINC00594	0.641665	0.447689	0.2966	0.00106834	0.000136693
RP11-115C21.2	4.87735	4.31164	3.09965	0.000807199	6.51554e-09
RP5-882C2.2	3.54223	2.61589	2.18476	4.85227e-10	1.51774e-10
OXCT1-AS1	4.59418	3.77537	3.35512	8.80664e-05	2.99615e-05
RP11-4N23.4	2.70739	1.45499	1.08096	0.00390685	0.00019768
Cabili_2084	48.4085	29.4177	10.6669	7.81725e-09	6.87545e-18
MIR497HG	28.8961	20.9673	17.6644	2.07537e-11	2.18415e-09
RP11-104H15.8	4.30014	3.1843	2.11312	0.00125735	1.36268e-07
RP11-728F11.4	2.28097	1.49702	0.419063	5.35862e-05	1.4526e-22
RP11-229P13.23	40.0667	13.0909	9.09204	1.21849e-26	7.57205e-20
RP11-597M12.1	7.69072	4.48776	3.26509	8.56991e-12	1.67284e-15
PDCD4-AS1	3.51554	2.63476	1.79994	9.00897e-06	3.07891e-14
Cabili_1510	1.9979	1.61401	1.13813	0.00190405	1.20948e-11
CTD-2574D22.2	0.843013	0.558324	0.493594	1.05536e-08	5.2306e-11
LA16c-380A1.2	0.744945	0.485742	0.46349	1.61801e-05	1.8991e-05
LA16c-380A1.1	1.85052	1.2925	0.875397	1.30621e-05	1.38789e-12
BCYRN1	14.026	6.47945	5.62845	3.68145e-11	5.13959e-09
LGG_LOC021000	2.52495	1.47879	0.726673	8.95516e-14	1.93288e-19
XXbac-B476C20.9	3.1416	2.4085	2.37313	5.77201e-05	0.00320326
RP11-248G5.8	2.36077	1.782	1.58776	3.55382e-08	1.07977e-06
CTD-2373J6.1	0.768012	0.550556	0.591136	5.43712e-11	5.56831e-06
PAXBP1-AS1	2.76503	1.84468	1.57207	4.63221e-21	9.04468e-20
LAMA5-AS1	1.95941	1.43895	0.901801	0.000362793	3.02099e-08
RP11-152N13.16	1.00784	0.491456	0.53249	4.61846e-27	2.68015e-10
AC074286.1	2.52066	2.30296	2.087	0.00253685	0.0019014
RP1-232L24.3	1.50486	0.951601	0.859059	2.96698e-08	1.77433e-07
RP13-225O21.2	2.98382	2.17448	2.11336	2.32221e-05	0.000166905
HMGN3-AS1	0.968288	0.732193	0.822297	2.29602e-11	0.00619552
RP11-97C16.1	5.72061	4.74364	4.11533	0.00124522	0.000124808
FLJ20021	15.6413	12.4169	10.5893	3.03183e-07	1.02699e-11
RP11-179A16.1	0.904451	0.533233	0.273187	8.38479e-07	1.87999e-13
RP11-111F5.4	6.1727	5.31015	4.13173	0.00549989	1.79382e-07
RP11-473M20.7	5.86313	4.30688	4.2314	2.33677e-07	0.000278541
CTC-308K20.1	1.44138	0.934078	0.776648	2.62015e-14	5.68754e-12
RP11-18H7.1	1.16637	0.694351	0.645841	1.48828e-12	1.93184e-06
AC005356.1	1.57358	0.936373	0.709318	1.69862e-11	9.8851e-11
RP11-177H2.1	1.83618	1.42934	1.3852	4.74483e-07	6.91307e-07
CYP17A1-AS1	5.84348	3.32094	1.08978	5.77493e-15	7.79906e-34
PCAT6	4.7568	3.99808	2.80777	0.000392541	5.89059e-11
CTC-559E9.5	2.96433	2.39896	2.15853	1.37028e-06	3.08211e-09
DGCR9	3.81641	2.333	0.80511	9.89164e-08	1.22592e-22
DGCR5	7.68631	4.67678	3.01349	3.75178e-12	1.95198e-11
RP11-247L20.4	13.8764	11.4185	8.90227	1.11025e-11	3.09962e-13
GBM_LOC024482	1.33354	0.897966	0.877829	2.06971e-09	4.60632e-07
RP11-373N22.3	0.870633	0.596799	0.424154	1.90964e-12	1.41686e-14
TRAF3IP2-AS1	38.9948	33.9113	23.0299	0.00455462	4.81193e-12
SNAP25-AS1	2.9716	0.852687	1.38877	4.01715e-28	1.10508e-08
Cabili_315	0.863371	0.614984	0.456623	0.0018772	3.81964e-06
NKX2-2-AS1	15.8658	11.1615	8.11219	4.86469e-09	2.02292e-08
LINC01431	2.55584	1.57019	1.62691	5.65525e-10	4.40136e-05
RP11-867G23.10	0.967171	0.384691	0.261991	1.10101e-14	2.17455e-14
Cabili_1079	1.6313	0.691674	0.0389148	0.000431572	5.58204e-10
CTC-203F4.2	3.02645	2.19448	1.80524	2.57844e-05	8.67148e-10
ZEB2-AS1	7.65233	5.80932	5.30426	0.00639618	0.00121675
RP11-441O15.3	0.847183	0.610116	0.359442	1.04619e-07	3.70833e-24
MIAT	8.02594	3.7008	3.03574	1.0534e-11	1.30183e-11
RP11-140A10.3	1.8887	1.09597	0.824578	7.1829e-12	1.54835e-11
RP11-73E17.2	2.46792	2.06284	1.42203	0.000310948	2.96254e-10
Cabili_2411	3.63954	2.99372	2.48159	0.0056187	0.0010883
RP11-220C2.1	4.01066	1.65021	0.490023	1.10132e-25	4.05903e-28
RP11-572M11.4	2.03303	1.67399	1.43594	1.46563e-05	0.000224685
Cabili_1476	3.97329	2.39614	2.68134	4.4645e-11	0.00041706
RP4-719C8.1	1.66007	0.929075	0.627512	3.70879e-10	2.10961e-10
CTD-2527I21.4	1.40066	0.408248	0.572701	7.29551e-13	0.000118977
RP11-212P7.2	5.69647	4.66272	3.06352	0.000146068	3.9956e-11
RP11-132F7.2	1.46036	1.03441	0.170488	0.00078269	2.71193e-26
CTA-29F11.1	12.5427	9.86161	6.70427	0.000793974	9.20524e-11
RP11-452K12.7	1.56956	1.18347	1.00633	2.65014e-06	3.28879e-05
RP11-1182P23.5	0.932554	0.731353	0.391141	0.00535802	2.84595e-15
HCG18	11.029	8.66702	7.91823	4.27763e-05	2.1841e-06
RP11-321F8.4	0.711459	0.597501	0.421175	0.00553843	7.62943e-09
RP11-1114A5.4	1.84823	1.31707	1.14522	4.83708e-08	3.36364e-08
CTC-270D5.1	6.17586	2.71517	2.87676	1.5836e-05	0.00315945
CDIPT-AS1	0.747155	0.344619	0.528395	2.73584e-19	0.000871502
AC140912.1	2.07698	0.819687	0.579596	1.31914e-21	1.13603e-15
WDR86-AS1	1.00806	0.568159	0.32746	1.60827e-10	2.16807e-15
RP11-13N13.2	2.87643	2.2063	1.85573	3.58326e-11	1.973e-14
TOLLIP-AS1	2.89464	1.96249	2.09424	1.97945e-09	1.41388e-05
RP13-216E22.4	0.889594	0.703015	0.643223	0.000182685	3.09549e-06
TMEM254-AS1	2.93162	2.44066	1.51859	3.91828e-05	2.27282e-16
CTD-2396E7.10	263.191	198.544	174.115	0.00403118	0.000231127
Cabili_2741	8.76751	7.5896	7.3072	1.08893e-08	1.93184e-06
VLDLR-AS1	0.941654	0.505686	0.537744	2.52516e-13	1.78689e-05
MIS18A-AS1	0.954463	0.809366	0.729955	0.00300101	0.000135433
GCSHP3	10.4284	8.9722	8.67853	2.49488e-06	2.09981e-05
LINC00969	22.6707	19.6185	17.8756	0.00552425	0.00159302
RP4-565E6.1	3.12528	2.332	2.20157	0.000130489	5.642e-05
GBM_LOC045448	1.11233	0.637357	0.136001	0.000329207	2.68887e-14
RP3-399L15.3	3.20059	2.22307	1.59676	3.05899e-08	4.74253e-12
RFPL1S	3.88085	1.43637	1.45728	1.89165e-14	3.3257e-08
RP11-1148L6.5	8.3009	7.73808	7.06634	0.00249685	0.000921325
AC004019.13	1.51159	0.799234	0.763695	3.65714e-10	2.02292e-08
CTA-223H9.9	0.853816	0.588083	0.281855	0.000104607	2.2617e-12
RP3-466P17.1	1.89917	1.25363	0.56946	1.10449e-12	9.25735e-25
RP3-466P17.2	3.05417	2.18867	1.125	7.42191e-06	4.64429e-17
CTC-458G6.2	1.30685	0.724356	0.107394	0.00196005	2.65029e-18
RP11-143A12.3	0.939619	0.454256	0.654791	2.72272e-21	1.06863e-05
RP11-362J17.1	0.739231	0.56555	0.379437	0.000269423	7.72444e-11
RP11-686O6.2	3.88898	2.90832	2.48313	2.39685e-08	1.1556e-10
GBM_LOC042318	1.79934	0.468935	0.424362	1.16912e-32	1.94302e-14
CTD-2524L6.3	2.64333	2.41624	2.10767	0.00085203	3.95594e-07
RP11-275H4.1	1.91096	1.14177	0.813237	0.00719047	0.00332591
RP11-458J1.1	6.25299	4.65414	4.25547	2.30427e-15	1.16213e-09
RP11-644F5.11	11.8994	9.6521	9.89749	5.02233e-09	0.00118139
RP11-24M17.4	1.81191	1.26477	1.09947	8.97705e-09	9.54981e-10
RP11-548P2.2	1.31923	0.948292	0.837675	1.14834e-05	0.000458172
AC000068.10	1.60583	1.05366	0.516485	9.81885e-12	2.42795e-23
AC114730.7	4.74885	2.40342	1.89433	2.39904e-10	3.58684e-13
CTD-2366F13.1	3.93419	2.42748	2.51791	1.9572e-24	1.20663e-10
Cabili_2446	2.45271	1.9458	1.93895	5.35862e-05	0.00141618
RP3-467N11.1	1.03637	0.746424	0.713004	1.27295e-06	4.81806e-05
RP11-382A20.2	4.20175	3.50028	3.16949	5.65548e-05	1.06863e-05
RP4-647C14.3	3.97411	3.03971	2.13985	0.000697647	0.00120879
CTD-2358C21.4	1.55746	1.28938	1.04059	7.60995e-05	3.3138e-07
SCOC-AS1	1.9135	1.11764	1.3612	1.09575e-13	0.0025078
Cabili_1192	1.6201	1.09101	1.05886	4.72771e-09	1.07821e-05
RP11-384P7.7	1.76468	1.29509	1.21812	5.52591e-06	0.000369796
RP11-524F11.2	7.36064	6.17422	5.75747	0.00573582	0.0025078
RP11-95O2.5	4.03322	2.06963	1.53713	4.44946e-07	3.49101e-08
LINC01287	2.93258	2.30046	1.03347	3.72519e-05	3.92869e-20
RP11-1017G21.6	1.64304	1.15238	0.78791	6.79884e-07	2.02066e-12
Cabili_127	1.33798	1.06739	0.924724	0.00044778	0.000259772
RP11-1017G21.5	3.46852	2.54723	1.86729	1.46866e-11	9.67274e-17
Cabili_1481	2.04841	1.24171	1.07821	1.39798e-07	8.32823e-07
RP11-613D13.5	2.57588	1.90332	2.25642	7.86666e-16	0.00788243
RP13-890H12.2	5.91821	3.8501	3.63102	2.587e-18	1.26657e-13
LRP4-AS1	1.34641	0.849771	0.694222	6.91678e-14	2.29514e-12
Cabili_2240	9.7377	5.16881	6.56912	1.39385e-28	1.0911e-08
LINC01351	12.3074	6.57863	7.0282	3.7756e-19	2.07162e-07
GBM_LOC025187	6.92218	1.95147	0.0461927	7.13078e-18	9.03605e-33
MIR4674HG	1.14141	0.625964	0.629437	3.35241e-11	1.36268e-07
CERS6-AS1	25.9008	22.9162	20.1147	0.00176972	1.87994e-05
RP11-394B2.1	165.785	121.553	89.2614	7.57253e-12	1.91061e-15
RP11-550I24.2	1.32386	0.899235	0.571562	9.54095e-11	2.55334e-12
AC015971.2	4.9895	3.80079	4.00558	1.33394e-12	3.94508e-06
RP11-196G18.23	3.83636	3.21129	2.64258	7.23317e-05	3.20423e-08
CTA-373H7.7	6.67734	2.61312	2.19599	8.45979e-12	8.96914e-09
LA16c-OS12.2	1.62512	1.29582	1.02144	0.00333314	2.20645e-06
CTD-2302E22.2	6.52216	5.74357	5.27953	0.00916166	0.00228506
BDNF-AS	11.3803	8.37565	8.32373	8.57663e-10	1.02591e-05
RP4-813D12.3	1.64567	1.06516	1.19238	2.80653e-10	0.000194234
AF131216.5	5.68596	3.77691	1.75633	5.69517e-06	6.07639e-16
RBAKDN	0.689311	0.50935	0.495387	0.000233384	0.00503868
GABPB1-AS1	9.09834	7.06155	6.20978	0.000290372	0.000105018
STXBP5-AS1	1.12057	0.653079	0.669358	1.65201e-08	2.99615e-05
RP11-486I11.2	0.812371	0.553046	0.561987	2.49052e-11	0.000212819
RP11-822E23.2	1.48348	1.14427	1.13434	0.000839322	0.00221574
RP11-667K14.3	2.48245	2.15054	1.67771	0.000284302	1.66675e-12
RP11-983P16.4	13.1258	10.6467	8.90394	2.0457e-08	4.51975e-09
RP11-284M14.1	0.924241	0.766543	0.72706	0.00344051	0.0030894
RP11-529K1.2	1.80853	1.15331	1.21842	3.70867e-19	7.66769e-08
RP11-1134I14.8	4.05926	3.36518	1.85301	0.000100613	1.29658e-20
AC073283.4	5.0523	4.04886	1.61024	0.000799742	9.23196e-26
RP11-87C12.5	4.52607	3.29723	1.69928	3.67133e-09	2.3878e-22
RP11-258F1.2	3.66763	1.33831	3.20909	7.09744e-52	0.00745795
LA16c-316G12.2	4.3418	3.59347	2.67196	0.00253341	6.07809e-08
CTD-2256P15.2	2.02393	1.46567	1.70497	2.61516e-12	0.00268888
RP11-196G11.4	0.986898	0.747654	0.715477	3.45057e-05	0.000406276
U73166.2	1.56082	0.962423	0.730236	2.18803e-08	1.373e-09
BRD2-IT1	1.13807	0.931349	0.754088	0.00124522	0.000111445
RP11-432J22.2	1.07414	0.848837	0.552597	1.91574e-05	2.58682e-13
PITPNA-AS1	20.5759	16.7045	16.121	1.28975e-07	3.03612e-06
RP11-598F7.6	2.21118	0.623	0.685863	2.35985e-18	3.72332e-11
CTD-2531D15.5	33.2319	27.4931	27.6229	5.04905e-06	0.00366824
CTB-25B13.9	0.842698	0.438114	0.456622	1.84822e-09	1.07821e-05
RP11-2E11.5	1.90732	0.947953	0.504302	4.43305e-16	7.57205e-20
ALG1L9P	1.07567	0.862819	0.852815	3.96403e-05	0.00175162
CTD-2235C13.3	1.00487	0.596685	0.552046	1.81696e-11	1.3023e-05
AC009303.2	1.57755	0.941567	1.13697	7.48959e-15	0.000163971
GBM_LOC046797	3.40869	2.44147	1.95833	3.81076e-07	4.8742e-09
IPO9-AS1	3.02588	2.1694	2.0195	2.63541e-05	0.000317916
RP11-707G14.7	0.927558	0.654844	0.444748	3.8158e-12	3.5211e-17
RP11-316M21.7	0.938817	0.610572	0.556266	4.32002e-11	5.13959e-09
RP11-247A12.2	0.983852	0.73357	0.492567	2.39077e-07	2.4553e-18
RP11-819C21.1	1.22925	1.0385	0.858288	4.99017e-05	8.28701e-09
DICER1-AS1	12.8378	9.90005	5.16519	8.20614e-06	6.08605e-22
CTD-2636A23.2	49.9738	25.075	27.632	1.78048e-16	2.18805e-08
RP11-192H23.5	800.741	538.72	270.731	8.12465e-09	2.40315e-12
GBM_LOC005589	0.78974	0.63692	0.220103	0.000622595	2.61771e-21
LOH12CR2	4.06025	3.27115	3.30255	4.99402e-07	0.0025078
RP4-614O4.11	2.98393	1.15197	1.07771	6.76724e-31	7.57205e-20
RP4-669P10.16	2.88795	2.50826	1.35709	0.000645927	1.45302e-16
GBM_LOC030373	1.0193	0.774009	0.494953	0.00182731	4.568e-09
RP3-430N8.10	5.74801	4.64545	3.60693	0.00387207	1.53461e-05
RP3-430N8.11	57.5429	47.3091	38.7384	1.96095e-08	1.34641e-10
RP11-33H15.1	0.792326	0.58747	0.438429	0.00552425	0.00095298
RP11-393I2.4	0.628849	0.521879	0.432932	0.00474554	0.000465132
AC010649.1	12.134	9.04734	3.56445	0.00346964	3.43756e-12
RP11-649A18.12	0.761166	0.605721	0.464666	0.000352926	9.77698e-08
HEIH	18.025	15.9073	16.3906	6.50037e-06	0.00506858
RP11-21L23.3	1.76097	1.02824	0.703179	4.19578e-11	3.93259e-14
CTD-2287O16.5	2.3266	1.70868	1.49631	2.89507e-08	5.92546e-09
RP1-310O13.7	0.670553	0.436344	0.506224	7.06329e-12	0.000675592
RP11-452L6.6	0.734323	0.544954	0.467498	5.522e-06	8.95986e-06
CTD-2201G16.1	4.11161	1.13761	0.831516	1.55584e-17	2.59936e-19
ZNRD1-AS1	2.63143	2.07639	1.41134	2.93342e-08	2.03168e-13
RP11-16N11.2	2.32539	1.27889	1.01572	1.22442e-24	5.01636e-22
RP11-566K11.4	3.6362	2.97922	2.50022	0.00094944	0.000114543
RP11-61A14.3	3.16872	2.72519	2.4705	0.00259973	0.00761154
SCARNA9	2.88388	1.71392	1.03261	4.90054e-08	1.93388e-15
RP11-307E17.8	1.30634	1.04254	0.95199	0.00126958	0.000698103
MFI2-AS1	20.489	15.6982	16.2372	4.70419e-06	0.00221574
AC114803.3	3.53785	0.960317	0.933878	1.22328e-14	6.52948e-11
SNHG1	81.8685	62.7145	30.3868	0.000263573	5.20213e-23
SNHG8	116.928	87.502	68.2695	1.25774e-06	4.03224e-15
AP001062.7	3.04683	2.23775	2.35286	1.20968e-08	1.59129e-07
RP11-420N3.3	4.02268	2.90428	1.64281	6.37634e-07	6.59184e-13
LINC00839	6.43109	3.49564	1.5411	6.86893e-11	6.35351e-12
RP11-513M16.7	5.33657	4.5238	1.9284	0.00528192	2.51588e-14
RP1-122O8.7	0.75564	0.64718	0.565378	0.00664569	0.000255461
CTD-2291D10.4	1.41649	0.654325	0.419929	2.33447e-14	2.88325e-09
RP11-946P6.4	0.89969	0.449831	0.41943	2.36093e-10	5.20659e-09
CTD-2196E14.9	11.8721	9.36743	7.33772	4.54975e-06	2.43727e-06
RP11-422P24.11	1.99091	1.64797	1.6943	6.99728e-05	0.0083876
CTD-2035E11.5	0.804689	0.498279	0.402207	1.87381e-09	1.08294e-07
RP11-357K6.1	5.0459	1.90802	0.427904	3.8102e-25	1.07667e-27
RPARP-AS1	9.22536	6.87523	4.34733	8.31909e-12	5.30739e-22
CTC-255N20.1	1.18894	0.560587	0.354115	4.94782e-13	1.13499e-14
GBM_LOC006520	1.66611	0.456955	0.120105	1.32824e-22	2.12055e-27
GTSE1-AS1	1.827	1.19608	0.729272	5.13289e-10	3.42688e-16
RP11-347I19.8	2.62794	1.9371	1.28901	0.00444375	1.06365e-08
RP11-59C5.3	0.984909	0.784912	0.398213	0.000220552	5.46468e-19
RP11-796E2.4	3.50645	2.78565	2.7369	5.2723e-05	0.000498475
CTD-2530N21.4	2.11614	1.88234	1.22348	0.00485702	2.00132e-13
GBM_LOC039943	1.02168	0.742541	0.524229	0.000187262	1.70899e-07
RP11-68I18.10	0.906976	0.637562	0.3215	9.65405e-10	1.16134e-22
AC016700.5	5.0423	3.42264	2.49389	3.35241e-11	1.14305e-12
GLIDR	3.57985	3.05654	1.9745	0.00194682	3.05224e-08
RP11-380L11.4	4.13725	3.66564	3.01143	0.00553134	1.66286e-05
RP11-158K1.3	1.05219	0.918019	0.756037	0.00162767	4.62769e-09
RP11-731J8.2	6.72422	4.17639	3.33705	2.35247e-06	1.41388e-05
NS3BP	3.75089	1.9106	2.0208	2.43776e-10	1.07821e-05
CTB-1I21.1	1.71999	0.845579	0.0681203	0.00025589	4.16439e-19
GS1-72M22.1	1.8056	0.975963	0.526562	7.25392e-10	2.23391e-13
RP11-13J10.1	7.3189	5.63719	4.97079	3.83256e-06	3.49101e-08
RP11-231C18.1	25.5364	18.7381	1.19369	0.00403648	1.55741e-30
AC114271.2	0.860721	0.72109	0.58882	0.000151645	7.66769e-08
AC021188.4	3.56899	2.13047	1.66602	1.59524e-11	1.34641e-10
LHX5-AS1	7.28707	0.448115	0.00409602	5.37505e-28	1.01329e-37
RP11-848P1.5	2.21805	1.74362	1.41294	2.60446e-05	1.97492e-06
RAMP2-AS1	3.24012	2.49874	1.35051	3.06273e-06	3.20423e-08
AC096772.6	4.569	4.04241	3.29089	0.00113123	0.000118977
GBM_LOC009981	0.854527	0.438743	0.411425	6.292e-16	8.5559e-10
LINC01170	1.25163	0.847036	0.578728	0.000263171	4.24686e-06
AC011330.13	3.6707	1.74631	2.36848	1.51462e-32	4.24686e-06
AP000320.6	0.967659	0.737284	0.649363	3.18411e-08	1.0898e-11
RP11-549B18.1	2.91974	1.50787	1.87011	6.31946e-18	5.99337e-06
MIR4453	3.31612	2.1601	2.01804	4.32002e-11	1.03399e-06
LA16c-313D11.12	3.13438	2.55608	2.20845	1.03472e-07	3.07359e-12
CTD-2036P10.3	7.69515	5.78583	5.58709	1.64924e-11	3.09038e-08
CTD-2506P8.6	0.743324	0.624072	0.598344	0.000934106	0.00134829
PRKAR2A-AS1	1.77201	1.24868	1.41777	3.55382e-08	0.00610944
RP1-63G5.8	12.2451	9.59771	1.79102	0.0011852	2.99004e-15
PP7080	13.9472	11.9207	11.8785	0.000684232	0.00849859
FOXG1-AS1	1.88638	1.05576	0.942784	2.97151e-12	1.57245e-07
RP11-93H12.4	1.43661	1.02	0.671525	2.3698e-11	4.29856e-17
SLC25A5-AS1	3.15577	2.21012	2.12688	1.11658e-14	1.97961e-07
RP11-463J10.3	37.4472	29.2039	23.7613	1.52479e-05	5.17372e-08
RP11-97N19.2	3.29852	1.65276	1.78944	3.70324e-12	5.05136e-07
RP5-965G21.3	0.805346	0.663343	0.449257	0.000427439	4.68873e-11
CELSR3-AS1	1.67334	0.586549	0.898497	1.19466e-13	4.31323e-05
FAM222A-AS1	2.50569	1.47135	0.917705	2.52516e-13	3.80018e-21
AC007405.8	0.776042	0.528994	0.195671	7.78951e-05	4.61654e-10
RP11-278A23.4	1.17772	0.919118	0.402253	0.000111279	2.91199e-20
RP11-498C9.13	30.8159	27.763	19.5103	0.0058394	1.79382e-07
RP11-490B18.5	0.651852	0.492853	0.350893	6.82056e-06	7.5714e-10
RP11-386G11.3	9.06959	4.42208	3.97091	3.26003e-05	0.000163971
RP11-793H13.11	3.19048	2.11363	2.38944	1.59721e-13	1.85138e-06
FAM66C	5.36097	3.33805	2.99797	2.06246e-15	2.13042e-13
CTD-2647L4.4	3.98296	3.31883	2.63746	0.00318029	0.00155593
DDX11-AS1	1.46373	0.741083	0.871941	1.66403e-19	9.01515e-07
RP11-1263C18.1	4.24899	1.67013	0.923728	5.73026e-17	2.99004e-15
RP11-21A7A.4	1.33973	1.10315	0.511792	0.000282157	4.73506e-21
RP11-359B12.2	4.33225	3.58343	1.83309	2.44709e-05	1.96176e-18
GBM_LOC031579	1.53195	1.22698	1.23711	3.87083e-06	0.000168133
RP11-227B21.2	7.79852	3.96121	0.970474	2.51871e-09	1.70079e-18
RP11-715J22.6	1.69356	1.1088	1.23127	6.46251e-07	3.05218e-05
RP11-500G22.4	1.54893	1.18319	0.811599	0.00616664	2.39672e-05
RP11-464F9.20	1.08314	0.868415	0.421619	0.000793974	4.64429e-17
RP11-348F1.3	1.02306	0.801275	0.74439	0.000767217	0.00043844
RP11-348F1.2	0.956514	0.728815	0.492941	4.33905e-06	7.38381e-11
RP11-23N2.4	1.11437	0.726743	0.543727	4.27763e-05	5.97388e-11
RP11-91P24.6	0.664373	0.537877	0.457773	0.000665767	4.04873e-07
CTD-2651B20.3	1.47973	0.957124	0.919798	1.07361e-05	0.000274097
RP13-726E6.2	1.5474	1.08146	0.585022	2.39589e-05	2.31811e-14
RP11-527D7.1	3.4767	0.796094	1.95081	3.43305e-26	0.000127071
RP11-383H13.1	2.48845	1.23078	1.09811	5.3945e-06	1.41388e-05
CTD-3074O7.5	4.317	3.49276	2.99857	4.33905e-06	6.01043e-08
RP4-761J14.8	25.8019	22.3148	20.4045	0.00104106	3.94508e-06
RP11-315E17.1	1.088	0.682567	0.239365	4.38969e-06	8.05926e-21
DNAJC3-AS1	3.94545	2.50651	2.13634	1.68156e-19	3.43573e-14
RP5-890E16.2	0.848484	0.587565	0.479353	8.03495e-06	6.58187e-10
ASH1L-AS1	3.27284	2.51575	2.10043	2.06927e-08	4.78828e-13
LINC00403	5.23947	3.775	2.83675	0.000844756	1.58462e-05
Cabili_1897	2.03238	1.76698	1.60476	0.000690671	0.00187052
AP001462.6	0.918251	0.798098	0.67359	0.0024222	1.14734e-05
RP11-23E10.3	0.739223	0.549736	0.290596	0.000213903	5.48585e-14
RP11-1100L3.8	18.5906	13.1574	14.6598	0.00272416	0.00849859
RP11-266K4.14	7.35687	5.06701	3.6124	4.52929e-08	2.54695e-15
RP11-706O15.1	6.90167	4.283	0.800567	4.72771e-09	2.9186e-26
AC034228.3	2.5232	2.01143	1.70911	0.000845404	1.42846e-05
CD27-AS1	58.0566	49.3178	36.0834	0.000211134	4.54607e-15
XXbac-BPG283O16.9	6.76394	4.68415	3.53269	1.29071e-12	1.15767e-12
LINC00526	3.31613	2.72094	2.2803	4.24235e-06	5.94818e-07
RP11-566K11.5	7.01154	6.01345	5.53866	0.00344509	0.000194234
KB-431C1.4	1.42559	1.22472	1.1397	0.00222041	0.00264895
GBM_LOC021874	1.7226	1.05703	0.203965	5.34707e-06	2.12275e-26
RP11-31F19.1	11.6598	4.14806	5.2573	1.02192e-18	2.50797e-08
RP11-118K6.3	2.80553	1.80781	0.998298	1.56291e-10	6.53454e-18
RP1-315G1.3	2.68542	1.77458	1.82144	9.66918e-09	5.5877e-05
RP11-361F15.2	1.47518	0.931813	0.511351	0.000845404	0.000139162
LINC00853	1.30615	0.554764	0.839873	2.03371e-20	5.56831e-06
FAM226B	2.07669	1.80263	1.42718	0.00190405	8.51914e-07
CKMT2-AS1	4.85238	4.14779	3.09793	0.00161656	4.49664e-08
RP11-893F2.13	0.821294	0.618014	0.428121	5.96338e-05	5.46355e-06
CXorf28	2.16275	0.690182	1.22449	8.22013e-09	0.000312329
RP4-555D20.2	2.51586	1.5678	0.773883	2.82676e-05	3.94613e-11
RP4-555D20.1	1.16588	0.646289	0.381395	1.79079e-05	2.35864e-08
RP11-767C1.2	1.00036	0.837336	0.5304	0.00728039	6.33887e-11
RNU6ATAC35P	1.12862	0.608771	0.48238	1.77905e-10	2.10961e-10
KTN1-AS1	1.41044	1.22959	1.16865	0.00307408	0.00126539
RP11-326K13.4	1.53698	1.27312	1.13512	0.00714645	5.6968e-05
RP1-41C23.2	7.72163	5.75612	4.78062	0.00182731	0.00464809
CTC-260E6.4	1.05158	0.847412	0.593407	0.00044448	3.74107e-06
RP1-111C20.4	1.49889	1.14425	0.772653	3.09353e-06	1.44628e-13
RP11-600F24.7	1.38915	1.11548	0.836651	0.000304249	3.68311e-07
AC005042.4	0.736668	0.630085	0.544115	0.000203024	2.35067e-05
MRPL23-AS1	0.888408	0.610182	0.223109	0.000211134	2.76367e-22
AC006130.3	1.18996	0.861488	0.72097	5.09903e-06	1.3662e-08
RP11-74H8.1	132.478	54.7919	36.0008	1.93739e-22	1.6472e-13
TMEM51-AS1	12.7346	9.06207	10.1482	8.38895e-06	0.00960256
RP11-624G17.3	12.4937	7.05944	4.63631	5.91935e-10	3.70406e-13
LGG_LOC027853	2.34992	1.23017	0.171521	2.88177e-10	1.08215e-28
RP11-319G6.1	4.45405	3.56667	3.17639	4.81794e-07	2.77861e-06
RP11-498P14.5	0.622623	0.501105	0.310513	0.000558916	1.86089e-14
AP000688.29	1.05314	0.366706	0.613653	2.33614e-14	1.50247e-05
RP11-658F2.8	5.45549	4.64507	3.28953	0.0021998	4.36635e-10
RP5-1054A22.4	1.61963	1.06148	0.995262	5.75282e-07	8.42124e-06
RP11-124D2.3	71.4112	53.4508	30.1329	7.47462e-09	3.25755e-23
Cabili_1401	1.76324	0.803885	0.874188	1.24437e-15	2.10204e-09
ZNF205-AS1	1.03056	0.880936	0.862061	0.0013125	0.00657256
RP11-456K23.1	0.591441	0.525566	0.442624	0.00314921	0.000928513
RP13-20L14.1	1.1102	0.661499	0.385923	4.99402e-07	4.42609e-10
MIR124-2HG	3.71986	1.3775	0.497701	2.69202e-22	1.9834e-21
GBM_LOC016701	0.88395	0.470568	0.248707	2.49508e-14	4.98439e-16
Cabili_1973	3.59204	2.89516	1.99343	0.00180239	5.40017e-09
Cabili_2372	5.33595	4.60614	3.354	8.63939e-05	3.72619e-12
RP3-368A4.6	1.1887	0.81029	0.621312	3.70732e-06	1.30347e-09
HAR1B	1.00229	0.345458	0.123699	2.10893e-22	3.14266e-26
HAR1A	1.99657	0.809889	0.270273	3.35331e-21	1.83294e-24
AC018647.3	12.5069	8.91188	7.6083	8.91585e-06	3.13813e-05
RP11-522I20.3	3.72073	2.92288	2.5782	5.46693e-07	8.14711e-08
NUTM2B-AS1	5.80721	5.17232	3.74273	0.00296797	2.64802e-14
RP11-166P13.3	3.6119	3.14275	2.83852	0.00327918	0.000921325
RP11-477D19.2	1.01307	0.778163	0.645265	6.7824e-08	6.70744e-12
RP11-611E13.2	6.25526	4.90001	4.76542	4.38969e-06	0.000419991
Cabili_782	0.88072	0.700353	0.361415	0.00341615	2.00132e-13
RP11-547I7.1	0.663634	0.530682	0.37681	0.00985251	0.000163971
RP11-264M12.2	6.69445	3.43355	2.87612	2.29741e-30	1.78009e-17
TMEM246-AS1	1.91414	1.26058	0.668459	8.76335e-14	3.92869e-20
LINC00463	1.1275	0.774714	0.400815	1.02231e-05	3.14994e-11
LINC00461	64.4547	40.3997	34.6967	1.24261e-11	1.20754e-13
LINC00863	2.12156	1.74153	0.97926	0.000110314	4.44961e-18
RP11-355B11.2	10.4613	7.14237	7.03776	4.80067e-15	8.00034e-10
RP1-8B1.4	1.45497	0.905444	0.597893	9.36413e-08	4.63072e-11
RP11-338N10.3	2.12636	1.56511	1.27791	0.000276863	0.000516269
CH17-270A2.1	0.786229	0.638529	0.547311	0.00737429	0.000326474
CTB-119C2.1	2.09512	0.692298	0.669886	7.95529e-35	1.14984e-27
RP11-215G15.5	1.65793	0.587303	0.54074	5.67266e-15	9.96822e-09
RP3-425C14.4	10.3916	8.22234	6.34396	3.41403e-06	8.76974e-08
GBM_LOC028474	1.18907	0.937604	0.614857	3.79467e-06	9.86406e-09
RP11-482M8.3	1.09003	0.495802	0.207097	4.19578e-11	2.31811e-14
RP11-143K11.5	1.82729	0.780472	0.196947	1.50627e-13	3.25755e-23
XXbac-B444P24.13	3.01923	2.13742	1.14729	3.46314e-08	4.96903e-20
GBM_LOC016392	3.51763	2.69472	2.14353	3.20539e-06	1.15767e-12
Cabili_1386	2.33692	1.42879	1.14847	1.05778e-07	5.92546e-09
RP4-683L5.1	0.866607	0.519631	0.610166	1.30019e-06	0.00854284
AC144652.1	3.72423	2.36932	2.56093	2.6912e-11	1.20818e-05
RP11-872J21.3	0.67924	0.499519	0.421079	1.18291e-07	3.19379e-09
RP11-1072A3.4	1.67515	1.20246	1.02809	1.35294e-08	2.73342e-07
RP11-417N10.4	19.7754	15.1433	11.2312	4.84189e-11	2.16807e-15
RBM26-AS1	3.08331	2.49137	2.24302	0.000326504	3.78144e-05
AP000438.2	1.40016	0.518182	0.364849	1.21529e-16	1.19361e-15
MIR3911	4.22258	3.36792	2.01854	0.000222759	4.00956e-16
RP11-442H21.2	141.654	116.248	78.7039	0.00135854	3.68311e-07
RP5-827C21.4	4.69611	3.672	3.66161	0.000659091	0.00849859
Cabili_1016	1.70876	0.971882	0.867797	0.000148599	3.28879e-05
LINC01122	2.00141	1.34896	1.2625	2.47183e-05	0.000524945
BAALCOS	10.8032	4.73965	5.54564	2.5382e-19	1.63116e-07
AC005523.2	23.3098	17.731	17.9714	8.00941e-13	5.29588e-06
U82695.10	1.52696	0.814867	1.20355	7.91075e-09	0.000442271
SYNE1-AS1	0.872163	0.634232	0.54978	0.0020793	8.77459e-06
RP11-689P11.2	0.650084	0.490242	0.338885	0.000678319	4.11659e-08
RP11-178L8.8	5.83904	5.06603	4.36653	0.0081151	3.22641e-05
RP11-104O19.4	1.37734	1.0018	0.725266	2.24048e-06	4.11686e-09
RP11-1C8.7	2.97201	0.867417	0.168222	9.40098e-26	3.91123e-29
RP11-181C3.1	1.98441	1.12655	0.911167	5.72161e-14	5.34686e-12
CTA-445C9.14	6.10229	5.67248	3.6443	0.00772476	4.94448e-12
CTD-2017C7.2	1.66717	1.33209	1.08011	6.63887e-05	9.6787e-08
LINC00087	2.91642	1.91146	1.71072	2.32046e-05	0.000187513
RP11-135L13.4	55.3231	31.3566	37.231	3.66986e-25	5.40984e-06
RP11-98D18.17	1.35927	1.01112	0.592382	2.30766e-07	7.03652e-11
RP11-496H1.2	4.92589	3.80428	2.63866	2.46994e-05	5.2306e-11
AF131215.9	4.77913	3.92574	2.66289	3.87743e-06	2.58682e-13
AF131215.2	4.20586	3.43485	2.62799	0.000320674	1.30347e-09
LINC00471	0.703226	0.472826	0.512398	1.68455e-09	0.000241771
AC073641.2	6.16033	5.66803	4.93257	0.00161431	5.78229e-08
CTD-2653D5.1	0.700022	0.595297	0.199797	0.00331145	4.74669e-14
CTD-2228K2.7	20.4694	15.1126	10.8573	4.1419e-05	3.77e-11
MAPKAPK5-AS1	30.9347	24.8319	22.5971	1.5883e-10	1.23027e-08
AC004471.9	2.59354	2.03044	1.42055	0.000281727	1.64912e-07
LINC00987	1.42954	1.00808	1.08664	5.58443e-06	0.0020055
GBM_LOC047405	2.04434	1.74279	1.53368	0.00282599	2.47334e-05
MAFG-AS1	4.00776	2.85337	2.60374	1.1064e-07	9.22129e-07
SNHG20	9.54902	7.56417	7.13563	1.53103e-06	3.06928e-06
THAP7-AS1	3.17758	2.6036	2.11963	1.83424e-05	5.40017e-09
AC133528.2	9.10503	7.92037	7.8529	0.00094935	0.00334798
C14orf23	3.03376	0.65452	2.09533	6.76724e-31	0.00121675
NDUFA6-AS1	7.5405	5.34733	4.49202	1.01439e-10	9.88165e-13
RP11-61L14.6	16.105	5.30888	4.50502	6.2585e-31	6.60617e-20
RP11-135F9.3	5.19271	4.24376	4.23564	4.84573e-08	0.000133028
RP11-513M16.8	6.69416	5.02565	3.10664	6.84056e-05	1.48139e-18
RP11-400F19.18	0.985745	0.609009	0.425277	5.11457e-08	1.29341e-10
RP11-296L22.8	29.9628	19.8135	11.0879	1.36866e-08	4.51157e-14
CTD-2380F24.1	3.76354	1.77237	0.740874	3.87035e-11	6.08605e-22
RP11-524F11.1	0.886356	0.738715	0.557616	0.00182731	4.2927e-06
LA16c-360H6.1	0.97185	0.61035	0.469816	1.6399e-12	3.22349e-14
RP11-16P6.1	2.1837	1.60466	1.09417	2.80398e-09	1.2307e-12
RP11-363L24.3	0.705019	0.653916	0.54316	0.00906325	1.3023e-05
RP11-448A19.1	0.975155	0.802496	0.713085	7.93501e-05	3.16343e-06
CTC-241N9.1	2.80556	2.28205	1.81934	6.59601e-05	3.01283e-07
RP4-591C20.9	1.24636	0.914648	1.06164	1.73723e-06	0.00756119
GBM_LOC031096	6.46554	3.50376	2.15394	2.25826e-10	1.17491e-12
CTB-113P19.1	1.25416	0.938064	0.736791	0.00949628	6.64572e-05
HNRNPU-AS1	24.0161	19.6178	17.1003	6.70719e-08	6.59184e-13
RP4-738P15.6	49.4368	40.8207	42.1288	7.61589e-05	0.0089601
RP11-91G21.1	4.44189	3.09346	2.76826	1.62201e-11	1.30347e-09
ZBTB20-AS4	1.03944	0.769164	0.258773	1.04589e-05	3.56666e-19
RP11-278C7.5	3.07024	2.32558	2.12122	6.9725e-12	6.17043e-16
CTB-109A12.1	0.824542	0.634783	0.641979	5.97102e-08	9.44502e-05
TTC28-AS1	15.4903	13.992	10.3374	0.00232617	3.44351e-10
RP11-307C19.2	2.42265	0.876732	0.554046	2.06972e-20	2.67333e-12
GBM_LOC011896	2.5749	1.67063	1.44506	3.91613e-06	8.68334e-06
RP11-402D21.2	7.91268	3.49543	2.22671	7.37832e-17	9.74826e-11
RP11-320M2.1	1.17453	0.908444	0.731591	2.88618e-09	5.71445e-14
LINC00663	8.50444	6.2174	6.90857	1.98831e-10	0.000113477
RP11-81A22.4	4.50572	3.5806	2.2714	8.80664e-05	7.30833e-15
RP11-390P24.1	6.26847	5.49879	4.61411	0.00724386	3.08408e-07
AC062021.1	13.4819	4.41603	0.0982414	1.39675e-15	4.5553e-34
RP11-106M7.1	0.826597	0.633579	0.40604	0.00435371	0.000379226
RP11-551L14.6	1.69879	0.842135	0.756786	4.10281e-08	1.51724e-07
RP11-266K4.9	5.47398	4.49198	3.26254	0.000793974	5.2306e-11
RP1-206D15.6	0.962726	0.654706	0.518866	4.75315e-07	5.78229e-08
RP11-69H7.3	4.35156	2.94757	2.56808	4.82415e-06	6.40156e-08
RP11-446N19.1	1.70444	0.867624	0.845427	1.72126e-14	4.67964e-10
AC114730.11	2.71111	2.07797	2.09982	0.000553254	0.0035056
LINC00263	8.63575	4.77477	3.54483	2.56736e-18	2.65263e-17
RP11-451M19.3	1.25023	0.919108	0.815102	4.3237e-05	0.000151224
RP11-510M2.2	0.703719	0.584749	0.50005	0.000875987	0.00933056
GBM_LOC032111	1.54235	1.01513	0.403821	4.54199e-06	1.5389e-10
CTD-3193O13.11	35.0272	19.8818	9.37809	1.53848e-14	9.45358e-20
CTD-3193O13.14	16.4169	14.1496	10.364	0.000245788	1.82751e-08
LINC00086	4.21274	3.28518	3.17168	0.00101937	0.00700087
PARD6G-AS1	2.09751	1.74841	1.50228	0.00039607	0.00461825
Cabili_747	1.73	1.01709	0.680344	4.98252e-06	1.17314e-09
RP13-638C3.4	9.97532	8.82165	8.89777	0.00261865	0.00503868
LINC00404	2.49665	1.78394	1.41566	0.00441228	0.000127071
RP11-20I23.8	1.81037	1.49235	0.991376	4.0203e-05	3.61909e-06
AC009227.2	7.21547	6.0776	0.963148	0.000222759	6.87958e-33
Cabili_2025	0.921056	0.663748	0.391499	2.77608e-08	1.11158e-13
RP11-73M18.6	1.57224	1.19551	1.12008	2.8872e-06	8.8677e-08
RP11-20I23.6	1.82012	1.46543	1.39261	8.51574e-06	0.000704035
LINC00882	9.69769	8.30767	5.46547	0.00165223	3.44351e-10
AC104655.3	3.1046	1.61375	0.677474	6.62249e-12	6.65966e-21
AC034220.3	5.79071	4.15009	3.74824	1.97667e-06	2.37552e-09
XLOC_049250	0.608876	0.524639	0.487617	0.00805143	0.00548873
GBM_LOC026051	2.79016	2.13892	2.18805	3.45047e-06	0.00980018
RP11-390F4.6	2.65108	1.84526	2.16344	3.70879e-10	0.000427624
RP11-179B2.2	0.698063	0.520338	0.365586	1.05364e-06	2.13042e-13
SNAI3-AS1	4.33594	2.80906	2.69564	2.57412e-14	2.33689e-08
RP4-798A10.2	0.666348	1.08711	0.829557	2.50911e-18	0.000960921
LLNLF-187D8.1	7.17129	8.58077	10.9952	0.00323661	2.54882e-05
RP11-93K22.13	0.529489	0.671821	0.715268	7.54283e-05	0.000190961
RP11-283G6.3	0.501721	0.80014	0.951623	2.03685e-07	6.63994e-08
POT1-AS1	0.975613	1.29311	1.51687	0.000148831	8.60566e-06
RP11-109P14.10	6.02168	9.69905	9.86615	1.41757e-25	4.16588e-12
RP5-1033H22.2	0.540585	0.786246	1.21839	2.8872e-06	1.0898e-11
ZNF582-AS1	5.14416	7.46291	8.33356	2.52516e-13	2.7448e-11
RP11-415J8.3	1.08898	1.82795	1.79968	5.77545e-13	1.83104e-06
CH17-189H20.1	9.09884	11.13	12.2658	9.44037e-06	4.99353e-07
RP11-29H23.4	0.396505	0.726859	0.575425	1.05364e-06	0.00232106
CMB9-22P13.1	1.41346	2.06027	2.00509	3.84448e-05	0.00207973
CTD-3116E22.8	0.658809	1.52915	1.03188	6.41716e-10	0.00816582
TP53TG1	18.1102	22.1577	28.0149	6.20732e-07	4.95228e-11
RP11-565F19.2	0.577703	0.736626	0.841453	3.57889e-07	1.35038e-07
CTB-174O21.2	1.1528	1.4869	1.79137	0.00195735	1.86226e-05
AC002456.2	1.50936	2.59306	5.60832	1.15822e-10	4.15898e-20
RP11-702H23.6	0.699263	1.24322	1.74705	2.87246e-12	1.54517e-12
SERPINB9P1	0.474206	0.777145	0.886593	2.55462e-05	1.08945e-05
AC018766.4	20.5615	28.626	27.4369	3.99206e-14	1.93663e-05
AC018766.5	6.09137	8.7523	9.33138	6.61344e-12	7.54439e-12
RP11-455F5.5	0.853674	1.31485	1.42784	2.00245e-06	5.99337e-06
RP11-341G23.4	0.309823	1.02527	0.683866	1.44817e-20	1.7497e-05
RP11-386G11.10	368.972	431.667	677.803	0.00625523	6.21085e-13
CTD-2545M3.2	56.6335	70.7175	87.8231	3.4658e-09	4.95228e-11
Cabili_986	0.468705	0.691152	1.10034	2.2865e-10	6.24798e-19
WWTR1-AS1	1.4274	1.95317	5.06906	0.000579997	7.30833e-15
ZRANB2-AS2	1.36373	1.88801	1.75199	4.70419e-06	0.00926997
RP11-15A1.8	1.42169	1.69144	1.66688	3.20539e-06	0.00173771
RP11-1069G10.1	4.26171	4.81422	5.70379	0.00114156	0.000187513
AC017116.11	5.77344	7.73954	17.2986	2.20798e-06	5.3735e-20
AC007036.5	0.720986	0.956849	1.16645	0.000858126	0.000303943
CTD-2521M24.6	0.691403	0.82194	1.16671	0.00381062	1.16213e-09
CTD-2521M24.9	0.70965	1.23145	2.73983	2.34904e-12	1.37921e-21
RP11-309L24.2	0.48216	0.883693	4.98921	3.90442e-07	1.10567e-26
CTD-2350C19.2	1.74326	2.34032	2.69436	1.49618e-05	2.0251e-07
RP11-56B16.4	3.95799	5.45479	7.27825	2.26524e-08	2.47182e-10
RP11-394J1.2	0.520856	0.73735	1.27241	0.0040959	4.18206e-11
GBM_LOC030475	1.12557	1.59404	2.11245	1.85295e-05	3.23191e-09
SZT2-AS1	2.14425	3.68546	3.4944	1.50396e-35	1.83769e-14
LLNLR-470E3.1	0.683192	1.55272	1.86048	1.28953e-15	4.94448e-12
CTD-2619J13.17	1.09885	1.34445	1.58287	4.21655e-07	3.50819e-09
CTD-2619J13.16	0.400207	0.582574	0.623796	1.64371e-07	3.94102e-05
WEE2-AS1	2.42657	3.37403	3.65759	1.47518e-07	2.25644e-05
RP11-881M11.4	3.73338	5.19716	6.92987	9.44125e-11	2.20718e-22
RP4-622L5.2	3.72228	6.12004	6.49983	3.18789e-23	1.67284e-15
LINC00339	6.4122	9.8275	11.5193	5.21563e-19	1.21366e-14
CTC-444N24.11	5.55389	7.61728	8.39308	1.5115e-09	1.30183e-11
RP1-184J9.2	0.391869	0.67307	0.495644	1.85048e-35	1.34605e-06
CTC-435M10.12	0.830245	1.62107	1.41256	4.96039e-16	2.83642e-07
Cabili_918	0.742497	1.07088	0.941403	1.44777e-09	0.00458416
GBM_LOC012292	0.309453	1.5896	2.17834	5.15417e-11	2.80061e-10
AC006160.5	0.759135	0.897767	1.41905	2.29511e-06	2.76472e-16
RP1-92O14.6	0.653725	0.910871	1.04412	3.63483e-11	1.74564e-14
CTD-3138B18.5	1.21101	1.50783	2.13252	8.52135e-08	1.73117e-21
RP4-773N10.4	1.97395	3.25562	2.7148	5.46675e-27	6.94097e-09
RP11-430G17.3	0.597345	1.0315	0.686774	1.12038e-11	0.00503868
RP11-776H12.1	0.291898	0.702293	0.473643	5.55654e-22	0.000625136
CTC-459F4.3	6.55333	9.45431	8.18092	6.41969e-12	0.000921325
RP11-1277A3.1	0.947609	1.3503	1.77936	1.97573e-12	7.99686e-13
AC002398.11	2.59722	4.34637	5.09553	4.04415e-21	2.10977e-17
AC002398.12	11.3482	21.1104	86.2218	1.65005e-06	1.96022e-32
AC002398.13	1.47835	2.88504	3.6561	4.02556e-39	1.25591e-31
RP4-728D4.2	0.364644	0.746202	0.550806	1.43779e-25	6.63994e-08
CTD-2085J24.4	1.99347	3.25956	3.50527	3.66547e-28	3.26519e-18
RP11-173P15.5	24.9037	26.6215	28.8262	0.00216745	0.000174407
HLA-DQB1-AS1	1.86532	2.64382	5.57719	0.00775809	7.04422e-06
AC007193.8	16.7003	24.5911	25.8603	2.587e-18	5.25138e-15
AC007193.9	1.03029	1.40993	1.4541	4.98209e-05	0.000507442
RP11-556E13.1	0.412237	1.28655	1.41406	1.1859e-18	1.54517e-12
RP11-489O18.1	0.686858	1.4836	1.153	2.20326e-18	9.43199e-07
RP11-15A1.7	1.86638	2.67845	3.15793	4.84346e-22	3.85371e-25
HAS2-AS1	1.75733	3.1825	2.68591	9.05567e-12	0.000568096
RP11-809O17.1	0.375883	0.635698	0.99522	1.40057e-10	1.76365e-20
LINC01094	10.5134	19.1166	17.0038	1.54215e-08	0.00197508
AC005498.3	1.25768	1.48604	1.77551	0.000744033	1.60578e-06
CTD-2620I22.7	1.99737	2.73251	4.10384	4.58877e-08	7.33205e-19
LINC00324	0.503081	0.697484	0.753351	7.73981e-11	1.05136e-08
RP4-761J14.10	0.959048	1.45601	1.43925	2.44962e-11	1.47037e-06
RP1-74M1.3	0.353033	0.536904	0.968386	5.90285e-07	6.06175e-10
PYCARDOS	0.686793	1.51922	1.96176	1.27015e-10	2.02716e-10
GS1-114I9.1	2.1584	3.39628	4.72419	7.90257e-12	3.44609e-15
NUCB1-AS1	0.655104	0.836356	1.16017	1.1359e-06	4.54607e-15
ELMO1-AS1	1.23968	1.7136	2.14836	0.00191051	1.37296e-05
AC074212.5	1.52947	3.3359	5.21235	9.27562e-26	4.67184e-21
AC074212.6	1.20918	1.87686	2.42345	3.86583e-12	2.03438e-14
RP11-108M9.4	2.00062	3.84197	7.11186	3.63483e-11	1.22656e-15
CTC-444N24.6	0.755417	1.1066	1.00326	2.12715e-08	0.00172391
CTC-444N24.8	1.10217	1.6936	2.12312	3.49716e-07	6.58488e-09
RP4-635E18.7	0.509255	0.926896	0.726607	8.15345e-16	6.02075e-05
RP4-635E18.6	0.757138	1.02268	1.38031	0.000292791	1.75595e-08
CTD-2126E3.3	0.897767	1.13896	1.57381	1.56277e-08	2.67333e-12
RP11-24J19.1	3.46153	5.18562	6.62652	7.68792e-06	1.71445e-05
RP1-93H18.7	0.434357	0.620342	0.645762	2.55709e-06	0.000419991
RP11-15N24.4	0.680421	0.788112	0.874134	0.00315343	0.0056512
FARP1-AS1	0.675838	1.07293	0.920193	8.1966e-10	0.000485991
RP11-597D13.8	0.79184	1.75516	1.76194	2.97057e-17	2.40315e-12
RP11-867G2.8	0.593745	0.959521	1.46021	5.66484e-10	7.99686e-13
AC007319.1	0.303374	1.0701	1.20344	3.35241e-11	1.50212e-07
RP11-54O7.14	21.2602	31.6412	27.6923	1.99064e-07	7.11124e-05
CTD-2616J11.2	0.876408	2.01073	2.47533	5.08195e-15	8.7886e-10
CTD-2616J11.3	0.364789	0.762151	0.928806	2.93821e-11	3.17235e-10
RP5-894A10.2	3.02283	4.00177	4.26709	3.81076e-07	2.27769e-05
RP5-832C2.5	0.456076	0.651264	0.552704	4.80067e-15	0.00112589
RP11-443B20.1	0.501548	0.591837	1.11712	0.00166695	2.03438e-14
AC104653.1	0.616187	0.882579	1.04279	9.63799e-05	2.77233e-05
RP11-750H9.5	1.46189	3.19401	3.20757	1.87873e-15	1.96531e-09
CTD-2541M15.4	0.493636	0.594511	0.581182	0.00120358	0.000481805
Cabili_2248	0.517579	0.900046	0.963526	7.17137e-13	1.4191e-08
CTD-2619J13.9	1.05169	1.80164	1.56628	1.14362e-11	0.000604506
AC009005.2	0.537687	1.42029	1.05814	1.61491e-20	6.63994e-08
HCG22	0.237019	1.2063	1.67088	1.87102e-19	1.2307e-12
CTC-273B12.5	0.630112	0.904688	1.06503	1.97667e-06	2.05527e-10
RP11-552D4.1	3.65129	11.8606	14.4376	6.2803e-19	1.18816e-16
FOXD1-AS1	1.97791	10.6784	10.8733	3.21962e-25	1.60126e-09
RP11-554A11.5	1.40637	1.91794	2.49836	0.0020793	2.1841e-06
CTD-3035K23.7	0.359138	0.657827	1.37992	2.88359e-07	1.49234e-15
RP11-48B3.4	0.711897	1.24662	1.51408	7.68036e-18	9.51408e-21
CTC-241F20.3	0.675976	0.999516	1.46229	8.97364e-11	3.50658e-18
RP11-42O15.3	0.462921	0.789627	0.679259	4.76604e-13	4.57977e-05
KIF9-AS1	0.788577	1.16389	1.05234	4.14187e-20	1.70899e-07
RP11-17E13.2	0.514173	0.937473	0.867888	2.87246e-12	1.47306e-05
MZF1-AS1	0.870558	1.06915	1.62417	2.02506e-05	1.03735e-12
RP11-385F5.5	1.03596	1.37262	1.53028	5.40525e-08	4.34386e-07
ARAP1-AS1	29.5872	34.7226	36.6077	0.0013125	0.00121675
RP5-998N21.10	0.708458	1.10521	1.18449	3.95785e-06	1.42087e-06
RP11-480C22.1	2.41522	6.39446	3.85893	3.00933e-22	0.000675592
Cabili_1019	3.72127	6.24051	5.07263	7.63413e-29	1.69455e-06
CTB-59C6.3	6.077	8.14201	7.95948	6.43116e-11	3.15984e-07
AP000439.1	0.367783	1.00376	0.537242	4.8113e-21	0.0031805
RP4-758J18.13	1.06825	1.72061	1.39953	4.5136e-16	0.000984582
RP11-265N6.1	12.1425	15.2142	18.6326	3.76455e-08	7.0943e-12
RP11-837J7.4	0.817793	0.968991	1.27633	0.00094944	3.87024e-08
DLGAP1-AS2	0.973445	1.63331	1.90646	3.75074e-06	1.19663e-05
AC000123.3	0.623524	0.746212	0.943611	0.00913415	1.06863e-05
AC000123.4	0.775181	0.899493	1.17158	0.000506528	4.36635e-10
RP11-342M1.3	1.27964	2.0772	3.24083	3.31876e-20	1.43143e-25
RP3-465N24.6	0.432076	0.661947	0.78948	4.85227e-10	2.07007e-11
RP11-472N13.3	2.10196	3.61026	4.4398	1.68201e-08	2.00129e-07
RP11-360L9.7	0.840087	0.987698	2.08735	0.00272785	2.16807e-15
AC006129.2	0.464664	1.12246	0.976142	4.07878e-21	3.44351e-10
AP001350.4	0.80284	1.25792	1.09888	9.61588e-08	0.00598095
SLC2A1-AS1	0.499431	0.584517	0.862407	0.00427464	1.29578e-08
RP11-56P23.1	1.51999	2.49854	2.35671	6.76724e-31	1.57066e-13
RP11-733O18.1	0.365042	0.642695	0.466338	1.585e-12	0.00355906
RP3-477O4.14	0.782885	0.933545	0.989214	6.85155e-05	0.000187513
RP3-475N16.1	1.40359	1.71883	2.00198	7.15628e-07	1.92595e-08
RP11-305K5.1	5.5491	8.06371	9.0397	7.16906e-09	6.80364e-08
CTD-3113P16.10	1.38201	1.79592	2.9213	0.000130489	5.50706e-10
RP11-946L16.2	0.311864	0.815112	0.605503	2.50389e-10	0.000465132
GBM_LOC023326	0.808149	0.950711	1.0052	1.54187e-05	2.08015e-05
RP4-549L20.3	1.15515	1.73715	1.98833	4.66093e-10	2.10204e-09
TCEB3-AS1	8.70841	12.3144	11.4434	1.3843e-26	5.2306e-11
RP11-6O2.4	6.56496	16.5949	20.8971	2.34846e-20	4.78828e-13
RP1-20B21.4	28.4814	49.0978	53.4404	6.76724e-31	3.43573e-14
RP11-418J17.1	3.2935	5.27234	5.06081	4.25393e-24	5.26981e-12
RP11-815J21.2	0.765679	1.1266	1.17713	0.000781558	0.00119959
RP11-335I12.2	0.587957	0.835909	0.913828	3.11607e-07	1.27185e-06
RP11-185E8.1	0.317431	0.812434	0.926251	2.4315e-06	4.00208e-07
RP11-155G14.6	0.450821	0.848029	1.21248	8.1781e-15	1.20787e-15
RP11-107F6.3	0.547662	0.886167	0.955337	7.3375e-23	1.35028e-17
PTOV1-AS1	2.87816	4.91992	4.84948	6.52875e-36	3.27253e-22
RP3-460G2.2	0.305431	0.667926	1.33916	1.34045e-07	8.8677e-08
LENG8-AS1	1.53549	2.07898	1.99011	3.02707e-06	0.00164235
RP11-442N24__B.1	0.648026	0.978894	1.11441	6.66372e-13	2.70758e-12
RP11-552M11.8	0.486972	0.931757	1.08838	9.33157e-33	5.90416e-19
CTD-2047H16.4	1.03207	1.18046	1.25778	0.00754351	0.000568096
RP11-552M11.4	0.822139	1.27063	1.46899	9.25525e-11	4.95228e-11
LBX2-AS1	0.412177	0.537546	0.850722	0.000182402	1.16213e-09
RP5-1142A6.5	6.05979	7.42453	8.43974	8.54304e-05	1.30061e-06
RP5-1142A6.9	2.01303	2.59897	3.34614	0.00169677	9.41215e-06
RP11-104H15.9	0.815204	0.971402	1.36614	0.000372945	2.26315e-10
CTD-3157E16.1	1.18577	1.4822	5.06062	0.00544211	5.15294e-23
RP3-369A17.4	0.332863	1.11039	1.71464	1.17397e-13	6.60681e-15
RP11-141O15.1	3.69551	4.72272	4.66526	2.84288e-07	0.000375913
NFIA-AS2	1.70863	8.54003	6.60288	1.45225e-40	1.91871e-14
CTD-2619J13.14	2.98014	3.5185	4.1504	0.00557327	2.77861e-06
AC006116.24	3.94156	5.08507	5.79004	1.13441e-05	1.31577e-05
CTC-471J1.2	0.646318	0.885923	0.838908	3.14572e-07	0.000908595
CTC-471J1.8	0.432267	0.81204	0.747732	2.40544e-09	1.53599e-06
Cabili_2815	5.13515	11.4805	8.00295	1.53178e-30	1.57245e-07
GS1-358P8.4	1.97812	2.73367	3.68542	3.00012e-06	1.30183e-11
RP11-545E17.3	0.632642	0.76286	1.69081	0.000112518	5.499e-23
AD001527.4	5.17802	6.73468	7.31576	1.72959e-07	5.23216e-08
AD001527.7	1.34044	1.94263	2.30724	2.39987e-14	1.02232e-19
XLOC_060036	0.433099	0.653514	0.608042	1.52734e-05	0.00966949
RP11-439A17.10	0.654493	0.996598	0.95155	3.63633e-12	1.35775e-06
RP11-973D8.4	1.0657	1.38401	2.88119	0.000410431	1.97598e-13
AC009892.10	0.326018	0.708552	0.984959	2.22613e-19	5.73859e-17
RP1-111D6.2	0.546134	1.8926	1.13237	2.82527e-16	0.00131654
RP1-111D6.3	0.635978	2.63845	1.11389	4.4671e-19	0.00327731
KDM4A-AS1	6.12047	10.0688	9.68589	2.41677e-27	2.68437e-15
RP4-794H19.1	0.644833	1.02369	1.55014	7.25346e-09	1.84602e-16
RP11-96L14.7	4.42735	6.14331	7.24601	5.15942e-09	9.02751e-10
CTD-3157E16.2	1.7855	2.25454	7.92282	0.00556613	6.0871e-28
LINC01341	0.811536	1.7025	1.5207	5.72576e-16	9.54981e-10
Cabili_739	2.82938	3.55046	3.82628	8.38895e-06	2.63647e-07
ITGB2-AS1	0.328068	0.634466	0.993386	9.43873e-10	2.48084e-11
COLCA1	0.489142	0.702591	0.861958	0.00413796	0.00258944
RP4-639F20.1	8.68084	13.0595	12.8956	4.47414e-18	1.16213e-09
RP11-205M5.3	0.412558	0.554584	0.74446	0.00121202	1.28615e-06
RP11-155O18.6	0.7061	1.01769	1.15494	2.25157e-07	4.76856e-07
RP11-395L14.18	3.4696	4.11732	4.80032	0.000102388	2.3883e-08
CEBPA-AS1	0.698116	0.925108	0.962905	0.000274568	0.00532547
RP11-1376P16.2	1.18074	1.51019	1.69436	0.000897297	0.000182784
AC005932.1	0.448784	0.632024	0.738828	2.84784e-07	3.97853e-06
CTB-193M12.5	1.46969	2.14286	5.02701	4.85227e-10	8.27289e-23
ZNF790-AS1	3.44311	3.93888	5.02291	0.00277839	9.6787e-08
RP5-901A4.1	0.881489	1.05459	1.42818	0.00206661	2.68919e-06
RP1-317E23.3	12.3659	17.7946	26.726	2.22613e-19	4.11242e-21
RP1-317E23.7	18.6105	27.5271	27.4456	1.6116e-21	6.10385e-14
RP11-96D1.7	2.34721	3.07146	3.18483	1.26889e-12	9.20524e-11
RP1-283E3.8	1.19057	1.67872	1.52839	8.12465e-09	0.0006534
CTC-471J1.11	2.41133	3.11267	3.08533	2.74473e-06	0.000625136
RP11-698N11.2	1.39972	2.92604	3.83677	3.53036e-07	1.49605e-08
CTD-3252C9.4	1.43149	1.79168	2.8957	0.00284642	2.88325e-09
GBM_LOC031703	0.390888	0.652576	0.619426	7.63929e-08	0.000548625
HM13-AS1	4.15841	5.08565	6.31456	2.59887e-07	1.49605e-08
RP4-758J18.2	10.0527	14.7623	18.1319	1.00541e-29	3.39222e-23
AC026806.2	0.782751	0.988946	1.11953	0.000552436	2.39672e-05
RP11-162A12.4	1.04734	1.32022	1.55085	1.39744e-05	3.09549e-06
RP11-162A12.2	0.457093	0.536985	0.563645	6.50037e-06	3.50094e-06
RP11-465N4.4	0.979395	1.29693	1.61578	1.585e-12	3.22349e-14
CTD-2366F13.2	0.380649	0.600535	0.603013	1.22408e-08	0.000836291
CTD-2583A14.8	2.60277	3.29643	3.47788	1.30402e-05	1.60578e-06
ERVK3-1	20.501	27.8278	35.6003	7.0098e-14	1.22592e-22
RP11-74C13.4	6.32744	7.86699	10.0206	3.67146e-07	2.1201e-12
AC091177.1	0.543631	1.08771	1.07533	1.07934e-17	1.17314e-09
RP11-343L5.2	0.427212	0.498569	0.67188	0.00631022	1.81386e-06
RP11-629G13.1	1.62427	2.01179	2.20891	0.00286912	1.95634e-05
CH17-437K3.1	0.474311	1.09385	1.58946	9.71785e-24	1.30886e-19
RP11-57H12.5	0.448215	0.655476	0.664475	1.33202e-20	1.47827e-12
RP4-610C12.3	0.412502	0.710918	1.0735	0.000185532	2.48839e-07
LINC01356	0.346756	0.852233	0.601365	6.76724e-31	1.66417e-08
LINC01354	1.87786	2.8899	2.46929	3.86304e-07	0.00290422
Cabili_1991	1.92288	2.59674	2.88538	4.46443e-08	2.35864e-08
LA16c-349E10.1	0.637482	0.789109	1.249	0.00522625	2.64363e-10
RP11-148K1.12	6.23599	10.2678	13.0114	2.20792e-24	9.80253e-23
RP4-657D16.3	1.46009	2.69102	2.6845	4.59568e-16	6.58187e-10
RP4-704D21.2	0.380578	0.783515	0.511441	6.04297e-16	0.00286135
RP11-105N14.1	0.828309	1.19694	1.22027	2.80653e-10	0.000141584
RP11-384M15.3	4.4978	5.34937	6.24599	3.04868e-05	3.19379e-09
RP11-379B18.5	1.43484	1.57056	1.69169	0.00341161	0.00168223
CTD-2537I9.12	3.12077	4.04825	4.74676	6.57664e-13	2.51588e-14
RP11-254F7.3	2.07676	2.80715	3.69231	4.83699e-05	8.76974e-08
RP11-254F7.2	0.743569	0.926183	1.46678	8.03763e-05	2.09978e-11
AC084219.4	3.55357	5.06554	5.93705	5.80499e-12	7.38381e-11
CTB-33G10.6	0.407556	0.533616	0.582743	0.00462705	0.00521964
RP1-43E13.2	0.908968	1.96954	1.75671	5.48974e-35	3.03129e-16
RP11-124N14.3	28.0986	104.421	218.886	1.57861e-31	2.83942e-31
AC007563.5	1.41354	2.4568	4.35534	7.94958e-07	4.00067e-13
CTB-33G10.11	5.12521	6.73846	7.29423	6.52156e-05	7.1942e-06
RP11-160O5.1	1.08983	1.90931	3.56848	6.05323e-07	2.65263e-17
RP11-127L20.5	4.65366	6.19522	8.47273	8.13487e-06	1.30562e-12
TMEM147-AS1	3.09167	4.54328	4.70235	2.96769e-12	2.48217e-08
RP11-91A18.4	0.965622	1.26501	1.4028	8.80664e-05	1.59975e-05
RP11-288I21.1	3.10235	4.65838	4.65602	1.33202e-20	7.13572e-11
CTC-471F3.6	0.335332	0.857117	0.729066	3.05059e-16	1.81386e-06
RP1-50O24.6	5.94752	9.60171	9.62968	1.87479e-37	5.08627e-19
RP11-347E10.1	0.129289	0.988545	0.848508	4.85739e-26	3.22349e-14
CTD-2553L13.9	1.93823	2.71871	2.28587	3.96792e-13	0.00153271
Cabili_1231	1.75196	2.63533	2.84855	2.37294e-13	2.84595e-15
AC006942.4	2.60365	3.7502	3.92527	6.53074e-07	3.81372e-07
Cabili_2294	0.73002	1.09734	1.24526	5.77545e-13	1.6906e-09
Cabili_2293	0.251713	0.621386	0.705693	2.14218e-11	6.58488e-09
RP11-96D1.11	5.54512	6.57206	7.76762	3.53036e-07	4.61654e-10
RP11-378J18.8	0.972386	1.22644	1.18539	3.11668e-10	3.10922e-05
C21orf88	0.529731	1.29418	1.65107	1.57902e-25	4.59488e-20
RP1-286D6.5	1.2657	1.78019	1.60099	6.75436e-06	0.00593774
RP11-876N24.3	0.470073	0.610244	1.32717	3.77783e-06	4.40695e-19
SNHG9	32.6043	39.4094	52.5406	8.95572e-05	1.03228e-10
CTB-31N19.3	0.359665	0.646641	0.601596	4.37361e-16	1.30347e-09
CTD-2369P2.8	0.690575	1.12682	2.14217	2.04936e-05	6.96524e-10
CTD-2587H19.2	6.39537	10.1168	8.73133	9.65405e-10	0.00428549
RP11-467L24.1	0.104575	1.24933	0.904996	2.98842e-30	8.94703e-13
CTD-2659N19.2	6.18422	8.08268	11.0061	3.54856e-10	1.57066e-13
RP4-575N6.4	1.02698	1.82145	1.37819	3.17492e-19	1.06863e-05
CTD-2525I3.5	0.77297	1.00057	1.05045	2.72627e-15	8.56132e-12
CTD-2525I3.3	6.79103	8.37043	8.40578	4.24235e-06	0.000382125
AC015936.3	9.19098	17.0017	34.8788	4.14742e-10	1.78009e-17
PINK1-AS	23.7551	35.9904	30.4184	7.32915e-19	6.70978e-05
RMST	1.63853	2.26702	3.40398	0.000271061	5.17356e-07
NDP-AS1	3.21665	4.76373	5.2493	2.08706e-10	3.16343e-06
CTB-179K24.3	2.19396	3.34126	3.97681	1.3692e-23	1.76365e-20
DYX1C1-CCPG1	1.113	1.4655	1.95007	7.62809e-05	6.08049e-09
RP11-848P1.3	1.23384	2.3077	2.51817	3.21736e-14	3.32156e-09
RP13-977J11.2	0.452435	0.955283	0.622122	3.89997e-13	0.000419991
RP11-626G11.3	4.55445	7.02086	10.7583	5.82979e-16	7.44654e-21
L34079.4	0.90032	1.11281	1.28066	6.71461e-05	1.11868e-06
RP5-997D16.2	0.667393	1.0074	1.13155	2.13698e-15	4.21228e-14
RP11-90P13.1	0.395881	0.878678	0.910906	1.70938e-16	1.373e-09
RP11-817O13.8	1.0888	1.32341	1.42487	7.58783e-06	7.34726e-06
LIPE-AS1	8.15803	10.6635	15.4295	1.16448e-09	2.84595e-15
RP11-767N6.7	2.11775	3.12798	4.14302	5.97989e-30	7.49682e-29
RP11-344B5.2	1.0081	2.57855	2.60887	1.23781e-21	6.06175e-10
MIR223	0.535002	1.31066	0.996379	5.73026e-17	4.54761e-08
RP4-671G15.2	0.585321	1.21566	0.975772	3.55132e-28	1.5788e-08
AC092675.3	0.707915	1.24401	1.757	3.18909e-07	2.10961e-10
AC147651.4	0.408608	0.57817	1.39922	8.36676e-05	2.40498e-19
WNT5A-AS1	0.254055	0.678628	0.753036	2.44662e-13	8.06498e-08
RP5-930J4.4	32.1163	52.5079	51.7065	3.81786e-41	1.49244e-21
ZFHX4-AS1	4.19564	5.89206	5.17709	2.3327e-07	0.00142693
RP11-131L23.2	0.359818	0.530018	0.719291	2.88676e-05	3.24081e-08
RP4-714D9.2	0.623405	0.907717	1.06753	1.68588e-25	2.78979e-23
GBM_LOC039777	0.384046	1.15029	0.525141	1.9572e-24	0.00714588
FOXD3-AS1	0.158842	1.26815	5.29382	3.07077e-15	2.11781e-18
ZNF667-AS1	34.1842	45.6877	47.7082	6.91901e-10	9.00771e-06
SPACA6P	3.69793	6.34315	7.76374	7.22726e-18	3.03303e-17
RTCA-AS1	1.81501	2.39136	2.72924	3.36871e-08	4.82274e-09
RP11-311C24.1	14.0387	15.1931	16.1421	0.00310219	0.00381279
LINC01141	0.525389	1.20059	1.2463	1.17447e-15	1.62263e-09
RP5-890E16.4	81.7131	114.021	125.578	1.09575e-13	6.76799e-12
LAMTOR5-AS1	1.82647	2.67537	2.42967	2.80398e-09	0.00272936
CTD-2540B15.7	3.01605	6.51757	9.59443	1.36044e-13	1.08894e-12
RP11-159D12.8	2.27683	2.97397	3.80422	1.70147e-08	8.69199e-11
RP11-165J3.6	0.732262	0.941733	1.08003	8.80664e-05	1.1008e-05
RP11-373L24.1	0.908633	1.06835	1.17802	0.000131621	1.64715e-05
CTD-2527I21.14	0.658851	0.885216	0.894706	2.96518e-06	0.000163971
FAM181A-AS1	0.336994	0.652048	3.32358	0.000366331	6.98207e-18
CTD-2341M24.1	0.5467	1.10301	2.79016	4.25926e-09	3.38571e-25
RP5-890O3.9	3.70541	5.80791	4.97065	2.74077e-12	0.000921325
RP11-269F19.2	0.511034	0.669699	0.758969	1.9338e-05	6.26221e-06
ZMYM4-AS1	1.54144	2.1654	2.35374	0.00073241	0.00130657
RP4-758J24.5	3.65814	4.96593	5.99291	2.03607e-12	3.3059e-13
LINC00854	0.435266	0.661036	0.69198	9.11611e-10	7.77333e-07
RP11-797H7.5	0.523571	0.796414	1.0092	1.02731e-06	8.06498e-08
A1BG-AS1	0.977002	1.67973	1.85676	2.02239e-08	7.58836e-06
CROCCP2	6.69392	9.37989	9.0252	1.49335e-11	0.000568096
RP5-1180E21.5	12.9491	19.5769	21.7309	3.57441e-27	2.83268e-21
SLC16A1-AS1	0.477759	0.64783	0.94157	8.8573e-09	3.46726e-17
U91328.21	0.549301	1.11793	1.58358	2.21419e-15	3.23242e-19
SCGB1B2P	2.58644	3.70811	2.89362	9.76589e-13	0.00518396
GBM_LOC002313	0.901301	2.18574	3.2603	3.71516e-09	7.30833e-15
RP4-622L5.7	1.0487	1.82322	1.6126	2.57428e-15	6.32408e-06
CTB-147N14.6	1.07061	2.5253	3.42833	1.45887e-19	5.08334e-14
CTD-2510F5.4	1.216	2.22166	2.82089	3.50383e-15	2.19896e-11
CTD-2194A8.2	0.767694	1.99991	1.06941	8.1781e-15	0.00642916
RP13-20L14.6	0.835317	1.18979	1.12411	9.89883e-06	0.00532547
RP11-362A9.3	1.37246	1.608	1.62494	1.1736e-05	2.27769e-05
RP5-1074L1.4	0.737749	1.42536	1.03753	9.19632e-16	0.00201725
LINC01150	0.357171	0.844312	1.1863	3.46543e-12	3.26023e-16
RP5-826L7.1	0.67598	0.902021	1.19714	0.00015439	6.97831e-08
LINC01480	1.2448	2.63941	2.77527	9.17348e-12	7.23062e-09
LINC00665	8.67869	12.2028	15.7674	1.60925e-15	1.32518e-14
AC002116.8	1.77522	2.14806	2.4111	1.22509e-06	6.59313e-07
RP11-216B9.6	1.6676	1.94557	1.99192	0.000332434	0.00119959
Cabili_1378	1.02856	1.93362	1.80734	4.92915e-14	2.35864e-08
LINC01023	2.61261	4.01484	5.78531	6.96775e-09	8.98441e-17
CTD-2020K17.3	1.05763	1.37266	1.65862	0.00772476	4.86519e-05
CTD-2020K17.4	1.04365	1.42652	2.11169	3.3372e-05	1.24646e-12
RP11-95D17.1	1.18494	1.623	1.48423	1.06156e-10	0.0002109
ITGA9-AS1	4.488	6.28883	8.26571	3.51333e-09	5.71445e-14
ABHD15-AS1	0.854376	1.3894	2.22596	0.00317605	1.48313e-06
RP11-656D10.5	2.16195	2.97912	2.54434	5.07954e-10	0.00364066
RP11-316M1.12	53.7452	64.3515	96.8204	0.00129003	7.40428e-16
LINC00869	2.01622	2.54043	3.44054	3.70102e-06	5.96252e-12
CRNDE	0.681069	2.01642	16.0102	2.53966e-14	1.87233e-25
ZNF529-AS1	2.04549	3.30215	4.51617	2.32866e-18	5.77067e-20
HOTAIRM1	0.384289	0.603119	5.84701	0.00113123	1.82659e-18
RP11-133K1.12	0.366872	0.575743	0.695184	3.33739e-06	7.38833e-05
SNHG12	8.97171	13.3982	11.856	6.82339e-10	0.000257454
PPIEL	3.20717	6.21582	6.88376	2.49914e-06	6.44419e-07
AC135048.13	2.98074	3.81665	3.95628	2.23141e-09	1.07977e-06
CTD-2540B15.11	9.11393	18.3178	27.9533	5.17354e-15	4.34721e-17
CTD-2540B15.13	23.2111	30.5695	29.2679	2.65014e-06	0.00126539
RP4-789D17.5	1.01354	1.92902	1.33396	1.3843e-26	0.00101882
RP4-789D17.3	3.42914	6.34779	4.86416	5.92335e-39	1.4191e-08
RP11-523G9.3	0.401954	0.55479	0.881678	2.81253e-07	6.52227e-13
RP11-386I14.4	1.03294	2.23976	2.16901	3.11507e-09	5.74088e-05
LINC01128	4.60044	7.64832	7.60191	9.80512e-26	4.568e-09
AP001055.6	0.73266	1.21088	1.2403	1.29857e-09	5.28927e-07
RP4-693M11.3	3.24256	4.58777	4.47637	1.64371e-07	0.000303943
CTB-32O4.3	0.329675	0.997299	0.495273	2.11451e-39	6.39114e-05
ATP1A1-AS1	4.12835	5.29298	7.19134	8.80664e-05	1.51482e-14
CTD-2544N14.3	8.66803	11.1889	12.0107	3.71732e-07	1.29341e-10
Cabili_2499	0.599882	0.930521	2.044	0.000609695	8.03749e-14
CTD-2012M11.3	0.4779	2.15695	1.51273	2.66554e-13	0.00854284
Cabili_2819	0.422148	0.74437	0.73153	7.4944e-06	0.00115271
RP11-864G5.3	3.74372	6.73936	9.51691	4.85227e-10	2.90606e-13
Cabili_643	0.79236	0.989017	1.1322	7.96514e-06	8.60878e-07
AC068831.6	3.61692	4.21096	6.04936	0.000384468	4.47368e-19
LINC01057	1.0875	1.55392	4.542	0.00489706	3.51164e-21
CTD-3220F14.1	1.1282	1.55566	1.60563	0.00010247	0.00184107
CTD-3220F14.3	1.48733	2.57255	2.22642	6.08941e-18	5.47479e-07
Cabili_2926	1.42006	1.64933	1.85777	0.000101255	2.3999e-07
RP11-967K21.1	0.999159	1.17974	1.25193	0.00181836	0.00431544
RP5-1113E3.3	6.76687	9.75501	9.11543	1.04168e-15	7.04422e-06
NEAT1	34.5531	50.4017	82.5851	4.13641e-06	1.08085e-14
C1orf213	4.53756	6.84787	5.3596	1.09013e-12	0.00129737
CTD-2528L19.6	2.06224	2.62022	2.46401	6.01345e-10	4.53827e-05
LINC00982	2.6668	3.46169	4.57048	0.00795398	6.77443e-05
FLJ27354	2.66687	3.91584	3.40756	1.92166e-10	0.00425985
RP3-325F22.5	0.403215	0.631659	0.609662	1.10704e-05	0.000395983
AC005013.5	2.69697	3.72296	4.73783	0.0010879	0.000266844
RP11-223A3.1	0.488621	0.618889	0.790103	9.75281e-08	1.45451e-11
RP11-834C11.4	1.83912	5.92599	7.74749	9.67848e-20	9.53315e-15
RP11-421L21.3	4.03327	8.33229	7.01063	3.20119e-47	9.15761e-16
RP5-1042I8.7	1.15586	2.61488	2.3731	4.63371e-45	4.00717e-17
NFYC-AS1	0.65081	0.925122	0.796416	1.29857e-09	0.0083326
CTD-3099C6.11	0.650224	0.815978	0.88179	9.65882e-06	2.09012e-06
GBM_LOC035081	1.22041	1.41319	2.11321	0.00936498	5.81411e-13
RP11-69E11.8	0.654213	1.03023	0.926687	1.25873e-11	0.000299115
AC074138.3	1.30495	1.67726	1.94003	5.3945e-06	2.1273e-09
RP11-267M23.1	0.497363	0.742069	1.16392	2.42397e-07	3.43573e-14
RP11-804H8.6	0.668228	1.51001	1.1306	2.09346e-34	4.16085e-09
C15orf37	0.645803	0.772719	1.11584	0.00331145	3.97115e-08
AC005339.2	5.42771	6.67623	10.8532	0.000504671	8.33531e-11
RP11-1049A21.2	0.377426	0.991867	1.19051	7.13078e-18	7.15537e-10
RP11-338K17.8	5.42354	6.62847	10.4832	6.89912e-06	3.97066e-15
LGG_LOC001868	1.1295	1.61894	1.98412	4.44167e-07	4.95228e-11
RP5-864K19.4	0.982307	2.02382	1.96822	1.06346e-27	1.81848e-15
LINC00662	6.14573	11.1461	9.64852	3.83176e-31	1.22261e-09
RP5-1024G6.2	6.69771	10.4359	10.4309	1.01073e-29	3.44609e-15
RP5-1024G6.5	0.615178	0.736496	0.831121	0.000152833	1.71445e-05
XX-C00717C00720L.1	0.719629	0.857133	0.92013	0.00489706	0.00256945
CTD-2587H24.14	0.780884	1.08691	1.18841	7.98337e-11	8.38435e-09
RP5-956O18.3	21.9034	26.7072	38.6332	1.87056e-09	3.54128e-22
PCED1B-AS1	5.89357	15.366	19.7066	3.61567e-25	9.29075e-19
LLNLR-268E12.1	1.04801	1.61854	1.33537	2.82464e-15	0.000194234
RP4-717I23.3	7.08353	13.076	9.50527	6.58945e-18	0.00241703

## Sheet: IDH mut & 1p19q del
lncRNA	Type1_median_FPKM	Type2_median_FPKM	Type3_median_FPKM	Type1vType2_FDR	Type2vType3_FDR
RP11-181G12.2	1.42125	2.78456	1.50561	9.59781e-29	9.83282e-16
RP11-46F15.2	0.7904	1.25123	0.869484	7.15652e-09	0.000178145
RP4-798A10.2	0.666348	1.08711	0.829557	2.50911e-18	9.77361e-06
RNF219-AS1	4.11261	9.11795	2.0579	4.00203e-09	1.31398e-12
RP11-930P14.1	0.680085	1.10478	0.459294	6.28322e-09	1.43857e-08
RP11-446H18.6	0.466413	0.780411	0.362376	1.16792e-07	1.14112e-08
AC083864.3	1.03523	1.73807	0.183855	0.000287322	3.32943e-27
AC011558.5	6.49498	10.0097	7.0434	9.05638e-05	0.00201592
AP005530.2	0.322812	0.769976	0.429418	1.9472e-15	2.55087e-05
AC011524.1	0.720366	1.34843	0.299411	2.92091e-05	6.14969e-11
FAM182A	5.94524	9.94236	5.85276	2.57428e-15	8.70018e-10
RP11-341G23.4	0.309823	1.02527	0.683866	1.44817e-20	6.19805e-05
RP11-17J14.2	7.25078	9.56981	4.441	0.00325348	1.44996e-05
RP11-216L13.19	0.538818	0.646051	0.4293	0.00592031	1.00813e-06
RP4-740C4.7	0.76239	1.23955	0.841846	9.84008e-11	0.00236496
Cabili_1332	3.6391	7.31001	3.54895	1.12019e-17	1.69985e-11
Cabili_436	0.851672	1.2832	0.975758	1.27015e-10	0.000573869
RP11-461A8.4	0.512724	0.583618	0.441687	0.00673582	0.000613053
LINC00906	0.477159	1.16347	0.190534	1.22377e-08	9.93372e-14
RP11-166D19.1	32.0211	37.0669	26.4746	0.00194024	7.37551e-09
RP11-725P16.2	1.60058	1.90772	0.669694	0.000410108	8.09899e-15
MAN1B1-AS1	2.6311	3.04221	2.13232	0.00743303	4.68208e-09
CTD-2319I12.4	1.34588	1.64977	1.11816	3.87972e-05	1.67747e-06
RP11-334C17.3	0.816169	0.958441	0.596736	0.00268669	9.7888e-08
RP1-184J9.2	0.391869	0.67307	0.495644	1.85048e-35	3.82152e-07
CTB-55O6.12	2.72272	3.359	2.85284	1.34982e-05	0.00788479
RP5-1031D4.3	0.852224	1.73089	0.890313	2.16119e-14	1.49993e-08
RP4-773N10.4	1.97395	3.25562	2.7148	5.46675e-27	0.00770277
RP11-18J9.3	0.604173	0.653142	0.25013	0.00906325	2.78042e-08
RP11-776H12.1	0.291898	0.702293	0.473643	5.55654e-22	0.00042669
AC006460.2	1.17068	1.28374	0.982646	0.00094944	4.14104e-06
CTD-3064H18.1	9.51562	11.81	8.3031	4.55035e-07	9.88401e-06
RP11-328J6.1	1.46505	2.39475	0.910969	0.000205691	2.27351e-10
RP4-728D4.2	0.364644	0.746202	0.550806	1.43779e-25	0.00074572
Cabili_2693	0.516459	1.14705	0.3061	6.05224e-06	8.43294e-09
RP11-489O18.1	0.686858	1.4836	1.153	2.20326e-18	0.00535914
RP3-467L1.4	0.612931	1.04634	0.640251	1.09879e-10	7.2673e-05
RP11-1006G14.4	1.35601	2.00684	1.64705	1.08733e-20	1.13145e-06
RP11-147L13.14	0.539694	0.734807	0.405104	0.00119026	1.16145e-09
RP11-147L13.15	8.79373	10.4443	8.63722	0.000326247	0.0063961
UG0898H09	12.1672	20.5122	10.5205	5.52591e-06	1.97227e-09
Z83844.1	0.62207	0.8285	0.547593	1.5115e-09	7.19431e-06
RP11-441F2.5	2.20694	3.39763	1.29973	5.31547e-05	1.70451e-11
RP5-994D16.3	0.845712	1.11636	0.936348	1.96095e-08	0.00971567
RP4-797C5.2	4.67983	9.42391	3.89869	1.13367e-13	1.05334e-15
SERHL	2.33204	2.91452	1.15535	0.00624729	2.25767e-09
LGG_LOC020514	0.477995	0.647417	0.35416	8.91485e-07	4.08699e-11
CACNA1C-AS2	0.589318	0.967777	0.532466	5.67266e-15	2.31473e-11
RP11-175O19.4	1.95924	2.2329	1.59942	0.000404663	1.45591e-11
CTA-250D10.23	0.97899	1.68559	0.84567	2.74077e-12	2.78042e-08
RP11-486G15.2	1.15014	1.71235	1.2806	1.25882e-09	0.00471885
CTD-2002J20.1	0.432769	1.02273	0.432811	3.8187e-22	1.5345e-11
Cabili_512	3.16752	3.74128	2.59313	0.00179989	2.1392e-05
RP4-791M13.3	1.0649	2.08341	1.30035	1.28346e-16	6.20918e-07
RP1-153G14.4	0.743956	0.897393	0.733557	0.000240426	0.00162775
RP11-54O7.17	0.95509	2.72361	0.637092	9.66168e-18	4.95435e-18
RP11-54O7.16	0.832661	1.6271	0.170955	3.11668e-10	1.79531e-31
RP5-832C2.5	0.456076	0.651264	0.552704	4.80067e-15	0.00807399
RP11-137H2.4	0.440256	0.652223	0.513479	3.63615e-13	0.000153023
LINC01088	40.267	122.562	25.5979	1.45736e-12	1.19148e-12
Cabili_1994	1.08992	1.45096	0.881104	0.000799129	0.000523903
AC009005.2	0.537687	1.42029	1.05814	1.61491e-20	0.00305485
LINC00689	2.73011	7.82959	0.325292	8.0248e-05	3.0243e-16
GBM_LOC026870	0.285633	0.711511	0.340132	4.00203e-09	0.000190348
RP11-554A11.9	0.463458	0.749117	0.351416	3.33541e-08	9.26993e-09
RP11-44F14.6	1.61514	1.99359	1.57381	2.70365e-07	8.86237e-06
RP11-182J1.17	1.34915	1.69604	0.962522	0.000799742	5.47987e-13
RP11-499P20.2	1.68694	2.34237	1.17027	6.47533e-09	4.37492e-16
RP11-585P4.6	1.0414	1.25534	0.837935	0.00631022	2.85528e-07
RP11-88E10.5	0.491171	0.671081	0.490726	3.76834e-07	6.82824e-05
C10orf85	2.14941	3.62987	1.34798	8.58285e-09	9.87528e-12
GBM_LOC006952	0.707264	1.00226	0.590758	1.5115e-09	3.45913e-08
CTB-129P6.7	0.917259	1.23599	0.827427	0.000136242	0.000185066
RP11-480C22.1	2.41522	6.39446	3.85893	3.00933e-22	5.57779e-05
Cabili_1019	3.72127	6.24051	5.07263	7.63413e-29	0.000172424
GBM_LOC039900	0.729964	1.42308	0.693652	1.12424e-06	1.61138e-05
Cabili_1307	1.49405	1.75197	1.34949	0.00728039	0.0080608
AP000439.1	0.367783	1.00376	0.537242	4.8113e-21	2.14787e-07
Cabili_1493	8.41941	12.2028	4.23404	0.00570734	2.84605e-09
RP11-44M6.7	1.63526	2.65928	1.92764	3.14572e-07	0.00191234
AC008746.12	0.416834	0.635041	0.456183	0.00020696	0.0049766
RP3-523E19.2	0.722205	1.01146	0.413894	0.00154124	1.54848e-14
RP11-666A20.4	0.458749	0.571428	0.458653	0.00858023	0.00571931
RP11-264A11.1	0.466382	0.969196	0	1.98057e-05	3.16198e-23
RP11-733O18.1	0.365042	0.642695	0.466338	1.585e-12	0.00591468
GBM_LOC039120	0.560623	0.896079	0.465708	1.07895e-09	5.14716e-09
RP11-429B14.4	5.8311	7.62908	1.73469	0.00266371	1.15615e-23
RP11-88H9.2	0.754324	0.896118	0.62129	0.00624729	0.000843869
RP11-185E8.2	2.96046	4.20219	2.73053	3.45948e-11	3.68198e-07
MIR4500HG	0.464375	0.767076	0.524698	0.00034951	0.00719198
LINC01532	2.68313	4.95412	2.64962	3.9511e-06	0.000168881
TINCR	0.6358	1.02325	0.534064	6.06258e-06	2.34869e-07
CTC-490E21.10	0.616534	0.994242	0.678969	2.023e-18	3.43344e-06
CTC-490E21.11	0.832469	1.55991	0.791136	1.2612e-18	9.52599e-13
RP1-167F1.2	0.644612	1.23102	0.43997	4.99563e-11	1.13837e-11
RP11-839G9.1	0.850659	1.50496	0.356383	1.13839e-08	9.63955e-17
CTC-273B12.10	1.377	1.56656	1.21812	0.0098994	0.00881435
RP11-521C20.3	1.34482	2.38645	1.51098	5.64069e-08	0.00375663
AC004837.4	0.450736	0.726089	0.431121	1.35e-11	7.0445e-05
LGG_LOC046950	0.501421	0.915734	0.250592	3.22341e-07	2.59156e-09
RP11-452F19.3	7.26607	10.4338	8.33931	1.71081e-09	0.00243321
FAM13A-AS1	0.488638	0.624022	0.373279	0.0076627	2.89731e-08
GBM_LOC042831	1.11564	1.58906	0.455462	0.00208216	5.60894e-14
NFIA-AS2	1.70863	8.54003	6.60288	1.45225e-40	0.00954757
RP11-259K15.2	3.64506	5.39651	1.40769	8.02133e-06	1.09155e-11
Cabili_2815	5.13515	11.4805	8.00295	1.53178e-30	9.8513e-05
RP11-439E19.10	1.23221	1.38502	1.00375	0.000609695	0.000149027
RP11-676J15.1	2.4788	3.19196	0.824022	0.000447111	1.00996e-12
RP1-111D6.2	0.546134	1.8926	1.13237	2.82527e-16	0.00253903
RP1-111D6.3	0.635978	2.63845	1.11389	4.4671e-19	7.49682e-05
TPTEP1	1.61175	38.8035	1.52347	3.25326e-39	5.1944e-32
RP11-640I15.1	0.467313	0.580824	0.450039	0.00794404	0.00561316
RP11-840I19.5	0.940644	1.29923	0.720259	5.31958e-05	2.35918e-06
Cabili_2748	0.446641	0.778575	0.545828	3.17169e-12	0.00845742
LGG_LOC030946	0.931305	1.29515	0.122911	0.000522312	5.59844e-31
VCAN-AS1	25.2197	38.1853	25.9761	4.58877e-08	2.83097e-05
IQCA1-AS1	0.507664	0.673257	0.435231	5.3673e-05	0.000123473
RP11-54O7.3	1.75743	2.77715	0.266869	1.37612e-07	6.96022e-36
RP11-298P3.4	2.7428	3.0146	2.30568	0.00775809	6.46147e-07
CTD-2553L13.10	2.87947	3.2303	2.69568	6.84056e-05	0.00904434
RP11-31F15.2	0.548896	0.832201	0.514004	3.52781e-18	1.65363e-12
RP11-89G4.1	0.523735	0.799899	0.492805	2.64847e-06	0.00055611
SNORD64	0.894294	1.42607	0.718584	1.33605e-05	7.12926e-10
RP11-15I11.3	0.457941	0.883961	0.240645	1.28298e-09	1.37151e-14
RP11-66D17.5	0.441601	0.711482	0.450188	6.68878e-07	0.000817417
RP11-84C13.2	0.666721	0.799092	0.414353	0.00606117	2.43666e-08
LINC01356	0.346756	0.852233	0.601365	6.76724e-31	6.19805e-05
LINC01355	0.564347	1.24115	0.649095	1.60039e-26	3.80933e-07
RP11-196G18.24	4.28737	7.24383	3.16433	2.01061e-11	3.01333e-20
RP11-196G18.22	1.79083	2.90012	1.29869	1.78894e-09	2.0516e-18
RP4-785G19.5	0.420183	0.674713	0.414158	1.97955e-09	1.53951e-06
RP4-704D21.2	0.380578	0.783515	0.511441	6.04297e-16	0.000235447
RP11-131L12.4	0.921647	1.12862	0.731673	0.0074922	2.8443e-06
RP11-318C24.2	0.349662	0.678481	0.466309	5.9437e-17	0.000294788
Cabili_2207	0.535753	0.927743	0.369627	5.062e-07	2.64516e-07
GBM_LOC028290	0.998408	3.54149	0.720082	1.90265e-18	1.31478e-21
RP11-71E19.2	0.512566	0.911209	0.587063	5.90342e-12	1.0486e-05
LGG_LOC007388	0.464373	0.760223	0.314831	8.0973e-10	3.52375e-12
RP11-856F16.2	7.2991	9.95761	6.44728	5.5749e-06	6.90349e-06
RP11-326I19.2	1.01988	1.18782	0.651056	0.000498436	1.13206e-19
RP11-158M2.3	13.2853	18.5631	12.8269	1.29857e-09	2.64464e-10
RP4-583P15.10	4.19482	4.83858	3.99585	1.72877e-05	0.00205827
RP11-307C18.1	0.511551	0.897523	0.558028	1.89103e-10	2.93321e-06
CTD-2553L13.9	1.93823	2.71871	2.28587	3.96792e-13	0.0017764
RP11-219B17.3	0.679275	0.867148	0.482199	0.0094846	2.62827e-07
SRP14-AS1	5.94939	7.63779	6.2093	4.05291e-07	0.00242895
RP11-312B8.1	0.760409	1.23072	0.812566	1.54409e-10	5.43618e-05
RP11-38L15.2	2.71963	3.32621	1.69029	0.00182731	6.05375e-19
SNHG3	4.90273	7.2364	5.07245	4.73406e-15	1.30021e-05
RP11-244H3.1	0.830938	1.37054	0.903964	2.52577e-17	5.91593e-09
RP11-463I20.1	20.3867	24.0753	19.2658	6.7507e-09	2.25618e-06
AC002451.3	0.932558	1.53844	0.873041	4.46513e-05	8.87974e-06
RP11-436K8.1	0.687272	1.30345	0.826615	9.5542e-10	0.000286331
C14orf64	2.1995	2.71792	2.05906	0.000908133	0.00300207
RP11-109P14.9	21.1632	32.2601	23.7587	4.19849e-19	6.72778e-06
RP4-575N6.4	1.02698	1.82145	1.37819	3.17492e-19	0.00789316
GBM_LOC047199	0.791663	1.03449	0.125765	0.00629774	1.98067e-23
RP11-360F5.1	4.64306	5.62071	4.70662	0.000137637	0.00181523
RP11-408A13.4	1.29821	1.71466	1.06563	0.000443816	2.61988e-07
RP11-517I3.1	1.88611	2.4637	1.88799	8.88446e-05	0.00367377
RP11-517I3.2	17.7514	23.9859	14.6957	5.69926e-06	4.53336e-09
RP11-613M10.6	6.1387	7.33606	6.23347	1.85295e-05	0.00591468
LINC00622	0.468913	0.58974	0.461053	0.00972346	0.00340782
ST7-AS1	2.49195	3.62699	2.0608	6.61344e-12	7.37551e-09
LINC01006	4.1434	8.49329	4.93647	4.07878e-21	3.30938e-08
RP11-305E6.4	1.37142	1.62247	0.654914	0.00127665	4.23466e-28
RP11-365O16.3	0.532689	1.29855	0.730769	3.36733e-15	0.000478783
TBX2-AS1	7.62362	10.3048	4.31156	0.00349486	3.30374e-09
GBM_LOC039777	0.384046	1.15029	0.525141	1.9572e-24	1.6728e-13
RP5-1039K5.12	6.3705	7.32398	5.01612	0.00837754	1.02009e-05
RP11-352G9.1	0.430158	0.629334	0.305946	5.21219e-05	2.141e-07
RP11-159D12.2	3.88331	5.59689	3.94974	3.49106e-07	0.0084251
Cabili_2167	1.5731	2.34541	1.68447	1.9733e-12	0.000130573
RP3-428L16.2	3.63191	4.6885	3.47413	4.53888e-06	0.00102789
KB-1460A1.5	3.68398	5.09153	2.65625	1.87631e-08	1.40223e-11
MIR1539	0.549521	0.656852	0.478004	0.00165223	0.00129254
ENO1-AS1	0.590469	0.768769	0.505386	2.05277e-05	7.67686e-07
RP11-458D21.1	2.83205	3.45509	2.14449	0.00708087	1.5768e-08
RP11-385G16.1	1.94238	2.51795	0.915563	0.00462705	4.08699e-11
SCGB1B2P	2.58644	3.70811	2.89362	9.76589e-13	0.00284988
Cabili_2928	0.58761	0.966833	0.48222	2.73286e-07	0.00042669
CTD-2194A8.2	0.767694	1.99991	1.06941	8.1781e-15	1.72495e-05
RP5-943J3.2	0.527903	0.721157	0.44274	1.81239e-05	2.01511e-06
RP11-760H22.2	1.43327	1.85164	1.19545	1.60757e-06	1.67747e-06
RP5-1074L1.4	0.737749	1.42536	1.03753	9.19632e-16	0.00374378
CTD-2368P22.1	2.70713	3.71244	2.74512	1.74929e-08	7.51829e-05
LINC00609	0.498446	0.64721	0.21481	0.000138394	2.54214e-14
RP4-798A10.7	2.94587	5.17706	2.91954	2.21736e-17	1.64696e-08
LINC00519	0.625621	1.44598	0.320354	3.42997e-16	1.8307e-20
LINC01024	1.41305	1.57548	1.01341	0.00189879	1.03672e-10
RP11-48G14.3	0.700342	0.996234	0.541216	0.00393211	6.82708e-05
RP11-656D10.5	2.16195	2.97912	2.54434	5.07954e-10	1.17727e-05
RP11-656D10.6	0.995823	1.23967	1.07439	7.47048e-05	6.2338e-05
RP11-391L3.1	3.77662	4.6482	3.16362	1.04099e-06	1.89988e-07
RP11-334C17.5	1.64512	2.05104	1.04127	0.0017084	3.13175e-09
RP11-807H17.1	0.744939	1.34437	0.117223	0.000320188	1.8307e-20
RP11-274B21.9	1.2276	1.52863	1.08883	0.000160887	0.000493091
RP11-10L7.1	0.897335	1.45737	0.835777	0.000410431	0.000839551
RP4-789D17.5	1.01354	1.92902	1.33396	1.3843e-26	1.86535e-06
RP4-789D17.3	3.42914	6.34779	4.86416	5.92335e-39	1.21994e-09
ST7-OT4	0.516154	0.716127	0.547709	9.36413e-08	0.0037502
RP11-332H18.5	0.548343	0.689871	0.539037	9.89883e-06	0.000118801
Cabili_2636	1.29155	1.94585	1.20375	6.91901e-10	1.27309e-06
RP11-109D20.2	2.89534	4.49462	2.62941	3.9218e-12	2.7117e-09
RP4-535B20.1	0.580399	0.79952	0.484068	0.00502118	0.00186902
CTB-32O4.2	1.46655	2.16755	1.45064	1.22775e-12	1.01362e-08
CTB-32O4.3	0.329675	0.997299	0.495273	2.11451e-39	3.78459e-10
CTD-2012M11.3	0.4779	2.15695	1.51273	2.66554e-13	3.26802e-07
RP11-263K19.4	39.3207	55.7683	44.5549	1.77905e-10	0.00133653
LINC00476	4.33232	5.58069	4.32022	3.81076e-07	0.000101581
C1orf213	4.53756	6.84787	5.3596	1.09013e-12	0.00416842
CTD-2619J13.23	2.05477	2.75071	1.88251	3.11064e-07	3.7972e-07
RP11-96K19.5	1.20011	1.78559	1.44408	3.06999e-12	0.00537135
RP11-506K6.4	0.50517	0.768088	0.361884	4.80275e-10	3.34997e-15
AC069363.1	1.27555	2.72165	1.01255	1.5784e-07	0.00197226
RP1-39G22.7	7.58861	11.3578	8.51072	9.86954e-22	8.253e-07
RP11-252E2.1	3.03803	3.53191	2.8487	0.00712848	0.00119366
RP1-159A19.4	0.545503	1.37431	0.563837	5.51327e-19	2.97771e-09
RP11-37B2.1	3.73968	4.57724	3.3289	1.1696e-06	3.1e-10
RP11-345P4.9	13.4424	19.8472	14.8933	2.14957e-20	3.86948e-06
RP11-421L21.3	4.03327	8.33229	7.01063	3.20119e-47	0.00112835
RP11-231C18.2	0.898363	1.47786	0.0559762	0.000141241	6.67203e-30
CASK-AS1	5.38441	6.18625	4.45826	0.00272416	4.72661e-05
FLJ37453	2.49661	3.72291	2.87655	5.51327e-19	7.68562e-06
RP11-804H8.6	0.668228	1.51001	1.1306	2.09346e-34	0.000252843
LINC00960	1.26877	2.24422	0.387597	2.99055e-07	8.96224e-24
Cabili_1653	1.47491	1.94006	1.00662	0.00823799	8.97891e-07
RP11-130L8.1	1.17724	1.73516	0.808142	1.36792e-06	1.4865e-09
RP11-536K7.3	3.1603	4.3196	3.10397	1.36951e-11	3.92465e-08
XXbac-BPGBPG55C20.1	0.520674	0.768938	0.329464	1.02231e-05	1.62545e-09
LINC01135	0.422582	0.704484	0.465583	5.62199e-14	9.51725e-06
AC004540.4	31.9128	44.203	17.624	2.97792e-05	3.95143e-10
LINC00662	6.14573	11.1461	9.64852	3.83176e-31	0.00538359
RP1-140A9.1	0.714623	0.96631	0.730897	4.54199e-06	0.00298461
RP11-83N9.6	0.613247	0.798246	0.364538	0.000349235	7.47428e-17
CTB-92J24.2	0.599206	0.747664	0.42164	0.00718143	1.1304e-05
RP11-21L19.1	9.60665	14.8215	7.37534	3.51333e-09	1.45674e-10
WDR11-AS1	1.48971	3.56609	0.937339	1.91417e-16	4.73736e-17
RP11-236B18.5	0.782435	1.17687	0.838954	0.000231433	0.00513055
RP11-1105G2.3	0.521681	0.940934	0.642064	8.82904e-11	0.000286331
BZRAP1-AS1	1.31983	1.8339	1.17149	6.68878e-07	8.29137e-06
RP4-717I23.3	7.08353	13.076	9.50527	6.58945e-18	8.06125e-05
LINC00310	0.885595	1.64411	0.706401	3.27009e-10	4.08144e-08
RP11-670E13.5	8.40447	6.03413	8.05045	7.15652e-09	0.00182414
AC005754.7	1.36627	0.757521	1.86714	0.000137099	0.000157121
RP11-190A12.8	1.05156	0.483542	1.31487	4.71456e-08	8.04267e-09
CTD-2031P19.5	38.3573	34.1078	45.4198	0.00510993	1.68279e-07
CTD-2666L21.1	2.01661	1.14091	1.98514	5.90285e-07	2.96849e-07
AF196970.3	2.27651	1.81529	2.22286	2.58983e-08	0.000229871
RP11-156K23.3	0.818955	0.625835	1.18131	5.69926e-06	1.6728e-13
FZD10-AS1	0.967402	0.383947	0.640661	1.31278e-16	0.000144484
CTC-436P18.1	2.35193	1.93476	2.69403	0.0032093	4.14194e-05
LINC00674	22.3226	19.2879	25.6688	0.00222346	2.83891e-06
GS1-124K5.4	9.05808	7.23752	11.2772	9.38486e-07	6.34069e-08
RP5-1132H15.1	1.0647	0.985578	1.33132	0.000844756	4.28014e-11
AC016738.4	0.828122	0.557574	1.34637	2.87697e-10	2.34055e-18
AC005262.2	22.2392	20.3001	23.2083	0.003912	0.00789316
CTD-2015H6.3	2.18801	1.54495	2.21154	2.75653e-09	1.05498e-05
RP11-20B24.4	10.241	8.0424	14.6112	1.76951e-08	3.35067e-13
CTD-2033A16.1	1.57296	1.31781	2.63372	0.00179989	1.70603e-14
RP1-122P22.2	2.84622	2.39998	3.16149	0.00120358	0.000314602
ELOVL2-AS1	1.07943	0.748784	1.12098	0.000151882	3.75994e-05
RP5-1136G13.2	2.44	2.16288	2.99433	5.77201e-05	3.30785e-06
RP11-839D17.3	0.525335	0.384303	1.73964	0.000335184	3.32943e-27
KIAA1614-AS1	1.23822	0.780532	1.87129	3.12499e-13	6.62609e-28
FUT8-AS1	0.95273	0.745323	1.2028	0.00100298	2.64495e-06
AGAP2-AS1	9.55274	5.18054	11.1416	2.70192e-12	6.42037e-09
LINC01114	2.02834	1.36318	2.99914	1.2343e-08	3.58611e-15
MLLT4-AS1	1.08331	0.472782	0.573456	1.54674e-16	0.00702465
CTD-2044J15.2	4.4089	3.75048	4.5722	0.00012389	0.00845742
RP11-350N15.6	2.23021	1.32056	1.60176	3.12781e-26	0.00323595
Cabili_347	2.90219	2.09205	2.63661	5.5749e-06	0.00867462
EPB41L4A-AS2	0.640754	0.506191	0.948967	0.00723475	1.18584e-11
BAALC-AS1	7.47578	5.17039	15.0053	1.27342e-08	3.0243e-16
AC068057.1	6.30973	0.466761	4.24249	3.78593e-59	3.10566e-28
DLGAP4-AS1	9.88884	8.2412	10.2386	0.00151107	0.00368238
LINC00936	1.19835	0.872728	1.34941	9.63799e-05	0.000104831
KLF3-AS1	2.166	1.84679	2.44914	0.00240937	0.000467339
CTB-51J22.1	1.63482	0.870714	3.14267	1.61864e-13	1.81158e-18
RP11-605F22.1	1.67796	0.990767	1.70969	2.33667e-09	4.45724e-08
CTD-2015C24.1	0.643852	0.506009	0.724873	0.000484017	1.61945e-05
SCAMP1-AS1	8.6158	5.74186	6.91417	2.70084e-19	0.000923344
RP11-1277A3.3	0.566376	0.443801	0.761161	0.000366331	5.3406e-06
CTC-429P9.3	9.06124	6.95579	8.1541	2.72351e-10	0.00551806
CTD-3222D19.11	14.4212	12.0538	16.2318	5.28572e-06	1.06711e-07
Cabili_1814	1.28951	0.962678	1.21074	1.36628e-05	0.00293484
RP11-9E17.1	0.752159	0.513137	0.633381	2.6912e-11	0.0024263
RP11-10K16.1	1.34001	1.15765	1.91564	0.00644413	1.09721e-11
RP1-197B17.3	1.11746	0.94172	1.26039	0.000407683	4.29202e-06
RP11-395B7.4	1.45351	0.686409	1.53911	2.60446e-05	0.000162722
CBR3-AS1	5.86932	3.68925	5.46952	4.73219e-20	4.07558e-11
CTC-510F12.6	4.15617	3.00696	8.80208	8.20614e-06	5.70182e-33
RP11-594N15.3	1.183	0.605303	0.770645	8.93328e-19	0.00376543
RP11-137H15.3	1.61468	1.42987	1.70888	0.00161207	0.00753329
RP11-22P6.3	2.32479	1.94236	2.43384	0.00441228	0.000335671
RP11-5C23.1	1.59705	1.22317	5.8625	0.00100442	2.27189e-29
TMPO-AS1	0.627244	0.45426	0.471703	1.28689e-06	0.00656052
RP11-389C8.2	1.53136	1.21669	1.58634	0.000498436	0.00970002
Cabili_1137	0.917762	0.640313	0.778875	8.0973e-10	0.0067059
CHL1-AS2	2.78277	0.892021	2.64798	1.64327e-22	4.51696e-15
Cabili_360	2.52119	0.192873	1.24943	3.43746e-35	1.2016e-10
RP11-823E8.3	3.55063	1.70257	6.60048	1.00262e-13	3.03815e-22
RP11-138I1.4	370.848	285.88	504.719	0.00255032	2.72826e-12
RP11-817O13.9	1.5322	1.18127	1.71852	0.00215588	0.000222579
RP5-858L17.1	4.98523	3.08835	3.8028	3.57188e-16	0.00163579
RP11-337C18.8	2.94024	1.69459	2.44969	1.47023e-18	4.15256e-07
CIRBP-AS1	1.00943	0.786308	1.27534	0.000130489	3.60388e-08
RP11-317P15.5	0.909531	0.425345	0.99743	2.49489e-07	0.000153023
SATB2-AS1	1.18153	0.70785	1.16648	1.28689e-06	0.0010305
RP11-436D23.1	1.13692	0.86071	1.30583	3.72519e-05	0.000111873
GRPEL2-AS1	1.96135	1.02873	1.84831	2.17493e-34	2.05006e-15
RP11-552F3.9	1.63672	1.24099	1.91248	0.000343292	1.12815e-05
AC009404.2	1.30874	0.626877	0.782569	6.54355e-22	0.0084251
CTD-3131K8.2	3.12878	2.54726	3.92863	8.7212e-07	7.18263e-12
LINC01411	2.30823	0.621193	1.55219	2.28693e-18	1.34707e-05
RP5-981O7.2	1.18245	0.881817	1.19906	0.00226217	0.00322334
Cabili_2474	0.576439	0.404743	0.687604	0.000166094	8.86237e-06
RP11-265N6.2	8.04086	7.06016	8.74952	0.000126649	2.53461e-06
HP08942	6.08257	3.70004	6.17606	1.6109e-09	1.06369e-07
LINC00092	0.854209	0.556409	5.33949	9.04922e-05	1.87377e-33
RP11-571M6.7	100.903	86.7738	117.817	1.16758e-06	5.73805e-07
NUP50-AS1	5.38016	4.61641	5.9725	0.000880973	2.06407e-05
RP11-82L18.2	4.22759	1.47844	2.91181	2.12807e-21	2.41083e-11
MIR4458HG	5.18493	4.30202	6.60463	0.00119026	6.90349e-06
RP11-161H23.5	10.924	8.27381	46.6542	0.00129003	2.58175e-29
CTD-2152M20.2	2.74486	1.342	2.09052	1.00269e-17	4.41009e-05
SEMA3B-AS1	2.66921	1.51297	2.2986	3.77219e-09	5.38429e-05
RP11-363E7.4	1.27671	0.834642	1.14571	1.48488e-14	1.94365e-06
RP11-294J22.6	35.2715	31.3683	36.7933	0.00182731	0.00118768
RP5-1121E10.2	1.15108	0.957009	1.21023	0.00172359	0.00686155
AC092597.3	0.638721	0.479212	0.736349	0.000683234	0.000591722
RP11-799B12.4	1.31269	0.833727	1.5167	7.66426e-07	6.79846e-11
RP11-799B12.1	2.02661	1.66154	3.43893	0.000284302	9.138e-13
MMP24-AS1	42.6549	33.5754	40.5155	2.18079e-07	8.84507e-06
SAPCD1-AS1	0.826982	0.663769	0.936141	0.00737429	0.00254347
GBM_LOC040061	0.734614	0.279673	4.32993	7.90913e-09	1.15615e-23
Cabili_2865	0.649518	0.481144	1.17088	0.00165453	2.0776e-10
GBM_LOC013780	3.26902	2.39361	4.71537	0.000184243	2.23922e-08
RP11-455B3.1	0.942619	0.346954	1.01433	3.12499e-13	3.62211e-09
RP11-396C23.2	0.647183	0.38707	1.07281	1.01096e-08	4.71324e-14
SBF2-AS1	0.590596	0.456078	1.396	0.000512859	1.98067e-23
RP11-67L3.5	2.54665	1.66646	2.60408	0.00776781	0.00902968
RP11-195F19.30	0.650877	0.342092	1.9025	1.56291e-10	4.32995e-33
HORMAD2-AS1	0.883928	0.780071	1.4086	0.00325783	2.90575e-16
SNAP25-AS1	2.9716	0.852687	1.38877	4.01715e-28	0.000438017
RP11-563K23.1	3.0305	2.48793	3.46074	0.0081151	0.00770277
DKFZP434K028	2.53134	1.63363	2.13282	2.03354e-12	0.00129254
Cabili_1679	1.02131	0.779898	1.04033	9.00897e-06	0.000667
AC010761.9	1.57444	1.22816	1.86902	0.00655201	0.000356155
LINC01184	21.6467	16.3381	20.4166	3.16094e-14	1.15947e-05
RP13-753N3.3	5.2275	4.37303	5.22978	0.000233743	0.00225102
CDIPT-AS1	0.747155	0.344619	0.528395	2.73584e-19	0.000771105
RP11-375N15.2	0.775864	0.486753	0.942526	2.29902e-06	1.68819e-07
RP11-545P7.4	2.14202	1.86526	2.47276	0.000240426	1.11227e-07
GRIK1-AS1	0.825245	0.512708	0.965875	9.18133e-07	1.81146e-06
ZNF561-AS1	9.89345	7.86266	10.8191	2.21003e-08	1.27309e-06
LINC00961	0.822743	0.701978	1.06696	0.00826304	4.78303e-06
RP11-732A19.9	1.14055	0.785445	1.14281	4.19015e-05	0.000184555
RP11-143A12.3	0.939619	0.454256	0.654791	2.72272e-21	0.00427934
CTD-3154N5.2	0.767383	0.530891	0.792262	1.04666e-05	0.000114591
RP11-359E10.1	2.82577	1.83464	5.24986	0.00393729	3.34401e-13
RNASEH1-AS1	9.86844	8.27638	9.67897	6.17587e-05	0.00218705
RP11-337C18.10	1.98215	1.23617	1.98051	7.4465e-12	4.68977e-07
RP11-611O2.5	13.8622	10.6298	15.625	5.77545e-13	3.73494e-12
SUCLG2-AS1	0.865095	0.682829	1.28296	9.15825e-05	1.15756e-07
RP11-613D13.5	2.57588	1.90332	2.25642	7.86666e-16	0.00249783
VAC14-AS1	0.750413	0.513722	1.05487	0.00268669	1.09625e-08
RP11-817I4.1	0.962536	0.554834	1.08777	3.62465e-20	1.02053e-14
MCF2L-AS1	0.933565	0.753839	1.23443	0.00169441	4.87982e-07
RP11-296O14.3	0.851343	0.666284	0.83614	1.60057e-07	7.548e-05
RP5-1087E8.3	10.1113	8.37545	11.5095	1.43745e-06	3.51485e-07
AP000230.1	2.04783	1.24967	2.27406	1.24081e-11	3.39186e-05
Cabili_822	1.59076	1.26333	1.71379	5.4158e-05	0.000508948
RP11-108P20.3	1.69613	1.25089	1.58768	6.65877e-11	0.000135753
RP11-258F1.2	3.66763	1.33831	3.20909	7.09744e-52	9.10903e-31
RP11-1100L3.7	29.9986	26.2543	30.8282	3.12104e-05	0.000391192
RP11-156L14.1	0.760339	0.506479	1.74463	6.80207e-05	1.08449e-16
FBXL19-AS1	0.752769	0.364656	0.671041	1.83305e-18	4.46419e-08
EXTL3-AS1	0.848978	0.483778	0.689427	2.78762e-12	0.000478783
RP11-134G8.10	3.53565	1.51114	5.7092	9.31174e-24	3.07597e-25
CH17-140K24.7	2.00381	1.25431	2.36228	0.00658432	0.00216597
RP11-1079K10.4	37.7966	33.5783	40.7918	9.54632e-05	2.27732e-06
GBM_LOC026352	0.621684	0.470307	0.943379	1.28689e-06	3.73494e-12
RP11-342D11.2	1.92142	1.30003	2.11009	2.29308e-05	0.000185579
RP11-91J19.3	1.05838	0.773917	1.02874	2.46299e-06	0.000306433
TIPARP-AS1	1.67692	1.08172	1.56234	4.70262e-12	2.05083e-08
RP11-773H22.4	3.71078	3.15921	3.79533	0.000185532	0.0032289
RP11-61K9.3	2.71013	1.86733	3.05186	4.91228e-10	2.86884e-14
AC009403.2	3.71231	3.09386	4.20396	0.000517	3.18062e-06
RP11-63A1.4	11.1253	9.38531	12.9429	3.80664e-05	6.05979e-08
AC068499.10	0.986039	0.692415	0.885289	0.00010927	0.00720384
Cabili_2421	4.50279	3.17309	3.9615	2.19062e-10	0.000839551
RP11-38P22.2	6.83834	1.96723	12.3044	2.13495e-28	2.68406e-26
RP4-694B14.8	0.936118	0.691909	1.01822	0.000859366	4.59661e-05
AC011330.13	3.6707	1.74631	2.36848	1.51462e-32	4.64028e-06
DLEU2	2.02397	1.35509	1.80336	4.52532e-09	0.000190348
LINC01003	8.42671	6.70211	8.57723	3.04868e-05	0.00669484
RP6-65G23.3	1.0874	0.615798	1.0223	1.00011e-10	0.000609408
RP11-775C24.5	1.94695	1.60387	2.4851	0.00569924	9.40496e-08
RP1-65P5.3	3.25507	2.40279	3.24898	0.000407683	0.00577825
RP11-12G12.7	2.70904	2.05044	3.32138	3.60576e-08	7.99042e-12
LIMD1-AS1	6.01142	4.7971	7.73643	0.00162767	3.18062e-06
MID1IP1-AS1	5.14088	4.47361	5.13502	0.00226387	0.00428926
NRSN2-AS1	3.95012	2.79632	3.95008	3.00232e-14	1.1117e-09
CTA-293F17.1	2.50005	1.72046	2.36211	1.56291e-10	1.96189e-06
ADNP-AS1	3.13287	2.60856	3.45544	0.00034951	4.43584e-05
RP11-715J22.4	2.067	1.62621	2.2721	0.00014003	1.17817e-06
RP11-304M2.5	20.0347	16.6345	21.5295	8.57663e-10	6.91877e-08
RP11-1008C21.2	0.970063	0.781111	1.48636	0.000639883	9.54703e-13
RP11-527D7.1	3.4767	0.796094	1.95081	3.43305e-26	9.19746e-05
Cabili_448	0.960685	0.603831	1.06132	0.000570404	0.000541096
PHKA2-AS1	0.994463	0.779498	1.39328	0.00349228	3.41997e-08
LINC00639	1.95437	1.15717	1.66693	2.37374e-06	0.00181203
RASSF8-AS1	7.8578	5.67718	8.01434	1.29085e-10	7.67686e-07
RP11-362K14.7	2.52969	1.81093	3.64547	7.48243e-05	3.73494e-12
CTD-2325P2.4	2.21464	1.21755	8.46661	0.00659267	9.45363e-24
LINC00853	1.30615	0.554764	0.839873	2.03371e-20	0.00249184
RP11-332M2.1	3.01359	2.55487	3.47182	0.00713746	1.12815e-05
CTD-2267D19.3	0.855901	0.404988	0.812346	1.16124e-14	3.03323e-08
AC022007.5	1.16766	1.02982	1.46575	0.00570734	4.30012e-08
AP000688.29	1.05314	0.366706	0.613653	2.33614e-14	0.00140253
CTB-96E2.7	8.84778	7.34577	8.27299	6.20992e-09	0.00463216
AP001258.4	1.61156	1.32532	2.19405	0.000372945	4.80742e-10
ACTA2-AS1	1.23696	0.907666	1.26606	0.00012645	0.000477879
LINC01158	46.3053	38.8678	58.2754	0.00355159	8.30515e-07
LINC01159	1.20459	0.772872	1.96102	2.6912e-11	2.45298e-20
LINC01152	1.49015	0.985289	1.40163	1.21194e-10	2.17781e-06
TMEM44-AS1	4.32297	3.58499	3.96252	4.31666e-05	0.00187359
RP11-876N24.5	0.80232	0.665912	1.06651	0.0033287	1.61459e-05
RP11-11N9.4	3.27657	1.47112	3.20215	1.25078e-05	0.000389412
AC005197.2	0.78373	0.622093	0.919578	0.0014306	0.000190348
LINC00467	2.78737	2.02222	2.91688	2.72383e-09	3.45063e-06
RP11-27M24.1	2.3883	1.80948	3.32979	5.59119e-05	1.55267e-09
SNHG11	11.4842	7.36342	14.5596	3.64111e-12	1.28462e-19
SNHG18	0.785307	0.387577	5.36189	4.37537e-11	5.80353e-34
RP11-65L3.1	1.25918	1.02957	1.24565	0.00381062	0.00285483
CH17-340M24.3	13.0022	9.15914	11.8134	5.77545e-13	0.000252154
AC009948.5	6.96804	4.51338	5.82748	1.62734e-14	7.28813e-05
RP11-337C18.9	0.713107	0.488546	0.833823	1.34982e-05	2.74618e-06
AC073342.12	1.10184	0.905625	1.26937	3.37085e-06	2.85314e-06
Cabili_1965	8.45191	6.40462	9.31959	2.77608e-08	1.65224e-08
RP11-949J7.5	19.9993	15.9487	18.2126	3.32262e-10	0.00223869
U82695.10	1.52696	0.814867	1.20355	7.91075e-09	0.000552786
RP4-545L17.11	2.16261	1.25866	2.30927	8.53639e-08	0.000105036
RP11-379F4.4	0.772437	0.443026	0.749563	3.02707e-06	0.00191234
RP11-135L13.4	55.3231	31.3566	37.231	3.66986e-25	0.000574947
LINC00472	0.964763	0.589046	0.870806	1.31591e-06	0.00992943
RP11-388P9.2	1.42614	0.653999	1.14166	1.11904e-12	0.000323229
CTD-2342J14.6	0.590527	0.459155	0.609076	3.4241e-08	7.73908e-06
C14orf23	3.03376	0.65452	2.09533	6.76724e-31	6.47545e-11
AC025335.1	2.77229	2.44783	2.9433	0.00333758	0.000650869
AC010761.10	20.2183	14.9456	18.2706	0.000317555	0.00207837
AC016747.3	3.66986	3.09408	4.93091	0.000182402	3.62211e-09
RP11-65J21.3	0.892385	0.529212	0.782199	9.99452e-06	0.00373503
CTC-428G20.3	5.33068	4.54244	5.15653	3.45047e-06	0.00172934
CTC-428G20.6	0.639856	0.526204	0.695356	0.000201315	0.000253534
Cabili_523	1.55798	1.08477	2.21356	7.54283e-05	1.86936e-08
ARSD-AS1	2.85621	1.63793	9.33022	2.7568e-13	5.86836e-34
LINC00663	8.50444	6.2174	6.90857	1.98831e-10	0.00656052
CECR7	1.34746	0.790361	1.85428	5.31958e-05	1.99467e-07
TAF1A-AS1	2.10737	1.59829	1.93315	6.44352e-06	0.00300207
CASC15	5.94256	3.83218	5.23755	2.77608e-08	6.62322e-05
DPH6-AS1	1.34886	1.14394	1.73262	0.000956829	0.000147539
GBM_LOC008405	2.58548	1.45675	2.73295	3.99296e-08	1.23129e-06
RP11-361L15.3	19.0984	16.8503	20.4267	0.00171077	1.25372e-05
RP1-178F15.5	1.75899	1.44034	3.01966	0.000985516	6.81878e-16

## Sheet: IDH wt
lncRNA	Type1_median_FPKM	Type2_median_FPKM	Type3_median_FPKM	Type1vType3_FDR	Type2vType3_FDR
AC083949.1	0.576255	0.658802	1.04652	6.2013e-05	0.000494025
AF001548.5	1.63859	1.80645	2.67847	7.72655e-06	0.000222579
CTD-2517O10.6	0.497538	0.514666	0.977298	2.64363e-10	3.38973e-12
CTD-2031P19.5	38.3573	34.1078	45.4198	0.00872458	1.68279e-07
RP11-379H18.1	4.10661	4.3119	5.39726	0.00119959	0.000494025
H19	0.424038	0.464813	3.54617	2.36523e-10	6.51695e-12
RP5-1033H22.2	0.540585	0.786246	1.21839	1.0898e-11	8.06125e-05
RP11-156K23.3	0.818955	0.625835	1.18131	1.71445e-05	1.6728e-13
RP11-265D17.2	0.782879	0.634656	1.65143	1.0898e-11	1.10529e-15
PAXIP1OS	1.17232	1.07738	3.57229	2.80302e-18	1.07001e-22
RP11-805J14.5	13.7208	13.8584	17.1387	1.48717e-05	2.91828e-05
RP11-1143G9.4	2.79123	3.04134	6.50629	4.95633e-06	9.12758e-06
RP11-638I2.8	1.69788	1.66703	2.64411	2.77861e-06	7.98195e-06
RP11-16E23.5	0.915246	0.864772	1.04767	0.00860304	0.0037502
GS1-124K5.4	9.05808	7.23752	11.2772	0.000294014	6.34069e-08
AP003774.4	0.811423	0.892474	1.40498	1.94816e-08	3.39226e-07
TP53TG1	18.1102	22.1577	28.0149	4.95228e-11	9.51725e-06
RP5-1132H15.1	1.0647	0.985578	1.33132	7.11883e-06	4.28014e-11
AC007283.5	1.91872	2.17705	3.18816	1.45805e-05	0.000357112
RP11-565F19.2	0.577703	0.736626	0.841453	1.35038e-07	0.00202168
AC016738.4	0.828122	0.557574	1.34637	2.51316e-07	2.34055e-18
DYNLL1-AS1	3.13739	2.91927	5.82566	5.46468e-19	4.68053e-18
RP11-33N14.3	0.737066	0.808261	1.09892	6.51825e-07	6.63625e-05
FAM85A	1.29011	1.25447	2.37695	1.0911e-08	3.62211e-09
AC002456.2	1.50936	2.59306	5.60832	4.15898e-20	1.03672e-10
RP11-702H23.6	0.699263	1.24322	1.74705	1.54517e-12	0.00330599
RP11-20B24.4	10.241	8.0424	14.6112	1.89273e-06	3.35067e-13
SERPINB9P1	0.474206	0.777145	0.886593	1.08945e-05	0.00387122
RP11-295G20.2	1.48589	1.61913	2.76359	2.20812e-14	2.31473e-11
AF127936.7	0.754628	0.791754	0.959773	0.000269241	0.0075166
RP11-386G11.10	368.972	431.667	677.803	6.21085e-13	1.42098e-07
CTD-2545M3.2	56.6335	70.7175	87.8231	4.95228e-11	0.00463216
AC005253.4	54.2168	55.3127	60.5112	0.000524945	0.00623546
Cabili_986	0.468705	0.691152	1.10034	6.24798e-19	1.73831e-06
CTD-2033A16.1	1.57296	1.31781	2.63372	2.1273e-09	1.70603e-14
RP11-783K16.14	3.52766	3.95337	4.70712	1.59975e-05	0.00236238
PRR7-AS1	0.983796	0.916575	1.17423	0.00017601	8.27903e-07
RP5-1136G13.2	2.44	2.16288	2.99433	0.00018615	3.30785e-06
WWTR1-AS1	1.4274	1.95317	5.06906	7.30833e-15	1.05648e-08
RP11-839D17.3	0.525335	0.384303	1.73964	1.62961e-19	3.32943e-27
RP11-582E3.6	2.2938	2.43107	2.79713	0.000151224	0.00474059
KIAA1614-AS1	1.23822	0.780532	1.87129	1.51724e-07	6.62609e-28
FUT8-AS1	0.95273	0.745323	1.2028	0.00684895	2.64495e-06
AC017116.11	5.77344	7.73954	17.2986	5.3735e-20	3.05407e-12
AGAP2-AS1	9.55274	5.18054	11.1416	0.00270837	6.42037e-09
CTD-2260A17.1	0.526458	0.481781	0.699222	0.00315945	8.30738e-05
RP11-473M20.11	0.653164	0.633235	1.06736	1.73199e-05	3.25902e-05
LINC01114	2.02834	1.36318	2.99914	5.5877e-05	3.58611e-15
PSMB8-AS1	3.4253	3.11764	5.80358	7.32677e-11	2.37719e-09
CTD-2521M24.6	0.691403	0.82194	1.16671	1.16213e-09	2.20604e-05
CTD-2521M24.9	0.70965	1.23145	2.73983	1.37921e-21	1.2016e-10
Cabili_1625	1.28623	1.17806	1.60099	0.000320557	5.29631e-08
RP11-385F7.1	0.791636	0.851628	1.16826	1.45805e-05	1.86103e-05
RP11-309L24.2	0.48216	0.883693	4.98921	1.10567e-26	1.18684e-17
RP11-56B16.4	3.95799	5.45479	7.27825	2.47182e-10	0.00109835
RP11-394J1.2	0.520856	0.73735	1.27241	4.18206e-11	9.40496e-08
GBM_LOC030475	1.12557	1.59404	2.11245	3.23191e-09	0.00278346
RP11-535M15.1	0.728124	0.641547	1.48147	6.00617e-07	6.76815e-09
EPB41L4A-AS2	0.640754	0.506191	0.948967	3.05218e-05	1.18584e-11
CTD-2619J13.17	1.09885	1.34445	1.58287	3.50819e-09	0.000296389
RP11-881M11.4	3.73338	5.19716	6.92987	2.20718e-22	1.35702e-07
BAALC-AS1	7.47578	5.17039	15.0053	3.10565e-11	3.0243e-16
RP11-471B22.2	46.2443	43.2884	60.2814	0.00113456	5.55057e-06
LINC00339	6.4122	9.8275	11.5193	1.21366e-14	0.0038622
CTC-297N7.10	1.63553	1.57336	2.6924	0.00311156	0.00366119
CTC-425F1.4	359.683	329.98	529.253	4.68873e-11	1.5058e-13
AC006160.5	0.759135	0.897767	1.41905	2.76472e-16	2.48976e-09
RP11-589N15.2	0.429196	0.630379	0.912153	8.33353e-06	0.00136575
RP1-92O14.6	0.653725	0.910871	1.04412	1.74564e-14	0.00323595
CTD-3138B18.5	1.21101	1.50783	2.13252	1.73117e-21	1.18901e-11
CTB-51J22.1	1.63482	0.870714	3.14267	1.88664e-10	1.81158e-18
RP11-23P13.6	0.590283	0.528779	1.12672	4.76856e-07	1.00996e-12
Cabili_2195	0.682747	0.628026	0.935051	0.000135433	1.10312e-06
RP11-134L10.1	3.28141	3.42174	5.16728	1.373e-09	3.95143e-10
RP11-1277A3.1	0.947609	1.3503	1.77936	7.99686e-13	0.000453398
RP11-1277A3.3	0.566376	0.443801	0.761161	0.00196155	5.3406e-06
AC002398.11	2.59722	4.34637	5.09553	2.10977e-17	0.00349608
AC002398.12	11.3482	21.1104	86.2218	1.96022e-32	1.22109e-23
AC002398.13	1.47835	2.88504	3.6561	1.25591e-31	5.05423e-07
RP11-173P15.5	24.9037	26.6215	28.8262	0.000174407	0.00553652
RP11-173P15.3	25.6987	22.9787	29.6259	0.00334798	1.09767e-05
HLA-DQB1-AS1	1.86532	2.64382	5.57719	7.04422e-06	0.0057879
RP11-110I1.6	45.1681	43.9642	60.1486	2.50797e-08	1.41643e-07
RP11-15A1.7	1.86638	2.67845	3.15793	3.85371e-25	0.000296389
RP11-809O17.1	0.375883	0.635698	0.99522	1.76365e-20	1.01392e-07
RP11-152P23.2	1.04771	1.12215	1.58918	9.80795e-05	9.75359e-07
RP11-71N10.1	2.32878	2.04482	5.90748	6.15372e-11	1.13837e-11
RP11-10K16.1	1.34001	1.15765	1.91564	3.03612e-06	1.09721e-11
CTD-2620I22.7	1.99737	2.73251	4.10384	7.33205e-19	3.45606e-09
CTD-3032J10.2	0.803697	0.846336	1.46448	4.69127e-06	0.00013511
RP1-74M1.3	0.353033	0.536904	0.968386	6.06175e-10	1.50651e-05
RP11-395B7.7	6.32392	6.92294	13.0434	1.0034e-17	1.82465e-15
RNVU1-14	0.526262	0.643189	0.932546	4.81958e-07	0.00021561
GS1-114I9.1	2.1584	3.39628	4.72419	3.44609e-15	8.31661e-06
RP11-83A24.2	0.826277	0.876403	1.42841	6.96524e-10	4.32843e-10
NUCB1-AS1	0.655104	0.836356	1.16017	4.54607e-15	6.82708e-05
CTC-510F12.6	4.15617	3.00696	8.80208	4.1673e-21	5.70182e-33
AC074212.5	1.52947	3.3359	5.21235	4.67184e-21	1.18558e-06
AC074212.6	1.20918	1.87686	2.42345	2.03438e-14	0.00276843
RP5-906C1.1	0.861654	1.02167	1.96911	6.76799e-12	7.82448e-10
RP11-137H15.4	1.10943	1.13821	1.5218	9.00771e-06	7.72402e-06
RP11-303E16.2	1.89206	2.02817	4.11505	2.22504e-19	1.25227e-21
RP11-303E16.8	3.34827	3.48915	4.45777	5.93909e-06	6.43784e-05
RP11-5C23.1	1.59705	1.22317	5.8625	9.29075e-19	2.27189e-29
RP11-5C23.2	0.511356	0.427433	1.30065	3.08284e-20	1.95087e-23
RP11-108M9.4	2.00062	3.84197	7.11186	1.22656e-15	9.77361e-06
CTC-444N24.8	1.10217	1.6936	2.12312	6.58488e-09	0.00847603
CTD-2538C1.2	1.53982	1.53016	2.39379	2.64196e-08	1.09625e-08
RP4-635E18.6	0.757138	1.02268	1.38031	1.75595e-08	0.000628765
CTD-2126E3.3	0.897767	1.13896	1.57381	2.67333e-12	4.98523e-06
RP11-24J19.1	3.46153	5.18562	6.62652	1.71445e-05	0.00500783
LEF1-AS1	0.563159	0.518321	1.52143	7.63114e-17	7.47428e-17
RP11-597D13.9	1.43155	1.75056	3.60198	2.66346e-11	1.00497e-06
APTR	14.1508	14.4392	19.2994	4.93634e-07	1.15756e-07
RP11-867G2.8	0.593745	0.959521	1.46021	7.99686e-13	7.53312e-05
LGG_LOC013371	0.620305	0.57482	1.02207	3.27058e-06	5.73805e-07
RP11-317J10.2	1.2325	1.2466	3.48481	6.65182e-14	2.75051e-19
RP11-443B20.1	0.501548	0.591837	1.11712	2.03438e-14	6.51695e-12
RP11-823E8.3	3.55063	1.70257	6.60048	6.00617e-07	3.03815e-22
RP11-209D14.2	0.942874	0.905371	1.36956	3.22641e-05	7.2673e-05
RP11-138I1.4	370.848	285.88	504.719	3.28879e-05	2.72826e-12
CTD-3035K23.7	0.359138	0.657827	1.37992	1.49234e-15	3.95143e-10
CTC-241F20.3	0.675976	0.999516	1.46229	3.50658e-18	1.1304e-05
RP11-77H9.5	15.0794	14.136	22.9112	3.4348e-07	2.35724e-08
CH507-513H4.1	0.729032	0.640332	1.14733	0.00506858	4.57886e-05
CTD-2201E18.3	1.51054	1.35677	1.89197	0.00214728	8.00834e-07
MZF1-AS1	0.870558	1.06915	1.62417	1.03735e-12	1.32065e-08
RP11-720L2.4	0.465902	0.506201	1.08224	1.44628e-13	5.51576e-08
RP11-152H18.3	27.9999	28.7319	39.8683	7.84857e-07	6.34069e-08
RP11-385F5.4	1.69132	1.65309	2.1178	0.00245495	0.000591722
RP11-381K20.2	0.473268	0.550767	0.827943	0.000276392	0.00972051
PRC1-AS1	2.6344	2.3974	4.35058	2.18778e-05	1.0113e-06
CTD-3131K8.2	3.12878	2.54726	3.92863	0.000214755	7.18263e-12
CTB-129P6.4	0.65956	0.721168	1.25952	4.78828e-13	6.28408e-14
CTD-2270L9.4	4.56146	4.57969	5.45692	0.000815989	0.000153878
RP4-673M15.1	0.883672	0.739618	1.15795	9.52847e-05	1.48088e-07
RP11-440D17.3	2.57659	2.39626	3.38487	0.000921325	2.53461e-06
RP4-758J18.10	0.578167	0.674575	1.16839	3.16768e-09	2.02139e-06
RP11-265N6.1	12.1425	15.2142	18.6326	7.0943e-12	0.000251467
RP11-837J7.4	0.817793	0.968991	1.27633	3.87024e-08	2.72997e-05
LINC00092	0.854209	0.556409	5.33949	1.03178e-26	1.87377e-33
RP11-77K12.4	0.48807	0.642625	2.63916	5.15294e-23	1.63469e-20
AC000123.4	0.775181	0.899493	1.17158	4.36635e-10	0.00129254
RP11-342M1.3	1.27964	2.0772	3.24083	1.43143e-25	3.05407e-12
AC093818.1	0.629803	0.689918	1.02214	5.81411e-13	1.31644e-08
RP11-1000B6.3	0.580549	0.639581	1.32236	3.30981e-10	1.26007e-08
RP11-360L9.7	0.840087	0.987698	2.08735	2.16807e-15	3.23328e-12
SLC2A1-AS1	0.499431	0.584517	0.862407	1.29578e-08	0.000725392
AC012358.8	0.603674	0.588828	0.875981	1.26178e-05	4.48451e-07
RP11-706J10.2	1.9701	1.17914	5.76732	7.34083e-08	4.16691e-13
DGUOK-AS1	0.693469	0.628064	1.04612	0.00158112	3.39226e-07
RP3-475N16.1	1.40359	1.71883	2.00198	1.92595e-08	0.00270729
MIR4458HG	5.18493	4.30202	6.60463	0.00777519	6.90349e-06
DTX2P1-UPK3BP1-PMS2P11	2.73835	2.55909	3.79298	1.20948e-11	1.09437e-11
CTD-3113P16.10	1.38201	1.79592	2.9213	5.50706e-10	6.77604e-09
RP11-161H23.5	10.924	8.27381	46.6542	2.56216e-23	2.58175e-29
CTC-498J12.3	1.10729	1.01255	1.51853	5.27444e-09	1.46849e-11
RP11-307C12.11	0.489401	0.52697	0.744246	0.000129293	0.000168413
LINC00893	0.475175	0.558371	1.03207	1.83262e-10	2.51965e-07
RP11-539L10.3	3.26887	3.21146	4.5724	4.1919e-07	1.8266e-07
RP11-712B9.2	1.42606	1.61013	1.93878	0.000301786	0.00198189
CTD-2325A15.5	0.796467	0.986427	2.09068	1.64527e-11	2.53492e-08
RP11-155G14.6	0.450821	0.848029	1.21248	1.20787e-15	0.000131673
GAS5-AS1	1.68888	1.56136	2.08654	0.000328799	6.24015e-07
RP11-440D17.4	0.445721	0.510064	0.807774	1.64715e-05	1.7284e-05
RP11-218C14.8	2.41661	2.36954	6.65348	1.01595e-11	2.87269e-14
LINC01240	1.20724	1.13455	1.64017	0.000123651	1.20457e-07
RP3-460G2.2	0.305431	0.667926	1.33916	8.8677e-08	0.00103238
RP11-799B12.1	2.02661	1.66154	3.43893	2.35864e-08	9.138e-13
Cabili_2797	4.67168	4.41107	5.17462	0.0014385	0.00132563
LBX2-AS1	0.412177	0.537546	0.850722	1.16213e-09	4.37567e-09
RP11-228B15.4	4.64781	4.80301	6.72881	3.22641e-05	0.000202885
RP5-1142A6.9	2.01303	2.59897	3.34614	9.41215e-06	0.00622145
GBM_LOC040061	0.734614	0.279673	4.32993	5.71445e-14	1.15615e-23
RP11-104H15.9	0.815204	0.971402	1.36614	2.26315e-10	0.000114914
CTD-3157E16.1	1.18577	1.4822	5.06062	5.15294e-23	2.11902e-17
Cabili_2865	0.649518	0.481144	1.17088	1.58936e-06	2.0776e-10
RP11-762H8.4	6.60057	5.39879	15.5058	8.56004e-08	4.63676e-12
FOXP4-AS1	0.553265	0.404728	0.931577	0.00403885	4.49257e-07
GBM_LOC013780	3.26902	2.39361	4.71537	5.74088e-05	2.23922e-08
PLCG1-AS1	1.40116	1.46694	2.25519	7.89564e-13	3.38973e-12
RP11-977G19.11	1.14376	1.10174	1.41956	0.000130499	0.000162088
RP13-298C8.3	0.568793	0.584449	2.51853	2.4553e-18	6.05375e-19
RP4-756G23.5	1.87671	1.70935	2.30258	0.00299623	1.27309e-06
RP11-396C23.2	0.647183	0.38707	1.07281	0.000625136	4.71324e-14
CTD-2619J13.14	2.98014	3.5185	4.1504	2.77861e-06	0.00826399
RP4-756H11.3	1.6689	1.54372	2.24115	0.00730718	6.22435e-06
EPHA5-AS1	0.479893	0.596931	5.3956	1.81848e-15	6.43078e-15
SBF2-AS1	0.590596	0.456078	1.396	1.86089e-14	1.98067e-23
RP11-629N8.5	3.56647	3.76899	5.18081	8.09771e-10	7.42066e-06
RP11-195F19.30	0.650877	0.342092	1.9025	4.41229e-21	4.32995e-33
GS1-358P8.4	1.97812	2.73367	3.68542	1.30183e-11	0.000157559
RP11-545E17.3	0.632642	0.76286	1.69081	5.499e-23	6.54274e-18
AD001527.7	1.34044	1.94263	2.30724	1.02232e-19	7.0445e-05
LPP-AS2	1.33217	1.36991	1.82786	0.000156898	0.000568952
HORMAD2-AS1	0.883928	0.780071	1.4086	4.63072e-11	2.90575e-16
RP11-973D8.4	1.0657	1.38401	2.88119	1.97598e-13	1.28131e-09
AC009892.10	0.326018	0.708552	0.984959	5.73859e-17	0.00230254
PRRT3-AS1	1.42036	1.44724	2.20982	8.45309e-10	6.43973e-10
CTA-292E10.6	0.917596	0.961791	1.27013	0.00023308	0.00103238
MIR4435-1HG	2.30878	2.61605	11.6013	1.22592e-22	4.26838e-20
RP4-794H19.1	0.644833	1.02369	1.55014	1.84602e-16	2.63769e-05
LINC01503	2.8751	2.60004	7.9802	6.8889e-16	4.58952e-20
RP11-798M19.3	3.30172	3.56005	5.44558	6.76799e-12	3.32916e-11
RP11-251G23.5	0.681078	0.754943	0.941292	9.01515e-07	0.000334769
RP4-612B15.3	0.991343	1.08315	1.64867	2.23049e-11	6.14101e-09
CTD-3157E16.2	1.7855	2.25454	7.92282	6.0871e-28	4.26838e-20
ERICH6-AS1	1.65416	1.46836	3.00224	9.6133e-11	4.28014e-11
CTB-89H12.4	9.62236	9.31591	10.6167	0.0031805	3.0409e-05
ITGB2-AS1	0.328068	0.634466	0.993386	2.48084e-11	0.00242895
HCG11	0.481052	0.570091	0.900522	2.16371e-06	0.000202885
CTB-46B19.2	1.63375	1.5782	2.4365	1.349e-08	3.95143e-10
RP11-545P7.4	2.14202	1.86526	2.47276	0.00772029	1.11227e-07
AC068831.15	30.3576	28.5843	38.4549	2.03996e-05	3.76901e-09
AC010226.4	0.97706	1.09152	3.57405	8.77097e-33	5.21676e-29
RP11-403A3.2	0.841755	0.925184	4.05338	5.71445e-14	1.88212e-11
RP11-403A3.3	4.14657	4.40859	20.042	4.90841e-16	9.56827e-13
CTB-193M12.5	1.46969	2.14286	5.02701	8.27289e-23	2.11902e-17
RP11-263K19.6	5.26605	4.98148	6.10585	0.00264895	0.00014019
RP11-732A19.5	13.234	15.6999	26.0206	2.25845e-07	4.1796e-09
ZNF790-AS1	3.44311	3.93888	5.02291	9.6787e-08	0.000707415
RP5-901A4.1	0.881489	1.05459	1.42818	2.68919e-06	0.000366551
RP1-317E23.3	12.3659	17.7946	26.726	4.11242e-21	1.7029e-09
CTD-2231E14.8	22.4593	24.5326	33.4776	5.71445e-14	1.88781e-10
RP11-557H15.4	0.641145	0.807873	1.75538	1.51654e-09	8.03067e-06
Cabili_2922	2.8761	2.59691	3.43623	0.00783045	0.000543948
AC017101.10	2.97397	2.90153	4.0675	5.51778e-06	7.53312e-05
RP11-1191J2.5	0.509463	0.468049	1.62237	1.96176e-18	1.35104e-17
FOXN3-AS1	0.985031	0.913643	1.16723	0.00389782	0.00207332
CTD-3252C9.4	1.43149	1.79168	2.8957	2.88325e-09	0.000162088
RP11-359E10.1	2.82577	1.83464	5.24986	1.35775e-06	3.34401e-13
HM13-AS1	4.15841	5.08565	6.31456	1.49605e-08	0.00824581
PAX8-AS1	1.64844	1.63416	9.06161	1.41106e-07	1.51105e-05
RP4-758J18.2	10.0527	14.7623	18.1319	3.39222e-23	9.18323e-06
RP11-417L19.6	1.1301	1.27605	1.59609	5.5877e-05	0.00606485
RP11-465N4.4	0.979395	1.29693	1.61578	3.22349e-14	0.00137258
AC092171.4	5.33712	5.31032	6.91446	0.000278541	2.36652e-05
ERVK3-1	20.501	27.8278	35.6003	1.22592e-22	6.46774e-06
AC084125.4	0.543083	0.595371	0.84584	6.32408e-06	1.01391e-05
RP11-30K9.5	4.30659	4.0292	5.1563	0.000431365	8.90675e-06
RP11-74C13.4	6.32744	7.86699	10.0206	2.1201e-12	2.14348e-05
SUCLG2-AS1	0.865095	0.682829	1.28296	0.00123547	1.15756e-07
RP11-343L5.2	0.427212	0.498569	0.67188	1.81386e-06	0.000101581
CH17-437K3.1	0.474311	1.09385	1.58946	1.30886e-19	7.7929e-05
RP4-610C12.3	0.412502	0.710918	1.0735	2.48839e-07	0.00565754
RP11-10L12.4	1.66949	1.79003	2.05869	5.35257e-06	0.00049216
Cabili_1225	0.547774	0.633205	0.8951	1.29121e-09	8.92426e-06
LINC01353	0.525405	0.419315	0.727437	0.00398266	2.53461e-06
RP5-912I13.1	0.436386	0.668312	1.31359	4.06613e-08	6.39517e-05
LA16c-349E10.1	0.637482	0.789109	1.249	2.64363e-10	1.017e-05
RP11-148K1.12	6.23599	10.2678	13.0114	9.80253e-23	5.33028e-06
HHIP-AS1	0.728463	0.657563	1.46554	1.34641e-10	1.98962e-11
VAC14-AS1	0.750413	0.513722	1.05487	0.00125579	1.09625e-08
RP11-817I4.1	0.962536	0.554834	1.08777	0.00518396	1.02053e-14
RP13-270P17.1	1.39652	1.57657	4.18768	5.2934e-28	1.09621e-25
RP13-270P17.3	0.461547	0.520347	1.47921	2.12275e-26	6.62609e-28
LINC00957	0.875824	0.735897	1.85319	2.20645e-06	2.06589e-09
PSMG3-AS1	5.26403	4.88092	6.98093	1.34605e-06	7.29268e-07
MCF2L-AS1	0.933565	0.753839	1.23443	0.00201725	4.87982e-07
RP1-65J11.1	0.949377	0.798314	1.75131	8.49246e-09	3.05407e-12
RP11-758P17.2	1.59505	1.64407	2.07499	0.000921325	0.00197707
RP1-198K11.5	0.612971	0.611597	1.08319	2.26315e-10	4.9072e-12
MIR99AHG	40.0279	33.1994	47.9019	0.00908621	4.1379e-06
RP11-1191J2.2	0.737568	0.586782	2.53018	2.64363e-10	7.9326e-11
RP11-196G11.5	6.1349	6.02101	7.98559	7.76904e-05	2.64495e-06
RP11-254F7.3	2.07676	2.80715	3.69231	8.76974e-08	0.00212761
RP11-254F7.2	0.743569	0.926183	1.46678	2.09978e-11	2.7551e-07
RP11-124N14.3	28.0986	104.421	218.886	2.83942e-31	6.98053e-07
RP11-473C18.3	8.15645	8.0191	9.3678	0.00160585	2.53579e-05
AC007563.5	1.41354	2.4568	4.35534	4.00067e-13	1.7336e-05
RP11-566K19.6	3.07712	2.58794	4.8349	0.00384157	1.73831e-06
RP11-156L14.1	0.760339	0.506479	1.74463	6.86004e-09	1.08449e-16
RP11-160O5.1	1.08983	1.90931	3.56848	2.65263e-17	4.95085e-06
RP11-127L20.5	4.65366	6.19522	8.47273	1.30562e-12	1.91181e-05
RP11-247A12.8	1.99753	2.0092	3.93758	1.97961e-07	1.12815e-05
SPIN4-AS1	0.729364	0.714081	0.873252	0.00665523	0.00243321
CTC-250I14.6	16.2919	18.5725	28.0389	7.65714e-06	3.86351e-05
TP73-AS1	2.66432	2.93884	14.5649	8.48781e-37	1.01878e-41
RP11-134G8.10	3.53565	1.51114	5.7092	1.22261e-09	3.07597e-25
CTD-3092A11.2	1.38287	1.68208	3.05422	1.93388e-15	3.48673e-11
AC008440.5	8.49311	8.45537	16.3072	6.70744e-12	4.49526e-11
Cabili_1231	1.75196	2.63533	2.84855	2.84595e-15	0.00414656
USP2-AS1	0.621184	0.602132	1.072	7.07863e-07	1.32136e-06
RP11-96D1.11	5.54512	6.57206	7.76762	4.61654e-10	0.00192169
AL450992.2	0.523525	0.385755	1.5979	1.48432e-07	6.81284e-12
C21orf88	0.529731	1.29418	1.65107	4.59488e-20	0.00133653
RP11-218M22.1	2.09859	2.31303	3.73051	1.35775e-06	4.25559e-05
GBM_LOC000748	0.569683	0.741881	0.991494	3.09549e-06	0.00460311
GBM_LOC026352	0.621684	0.470307	0.943379	3.74107e-06	3.73494e-12
RP3-337O18.9	5.53331	5.707	8.67022	1.83416e-11	1.97385e-09
RP11-326I11.3	1.05425	1.01849	1.55923	2.48217e-08	8.45974e-09
RP11-867G23.4	126.013	130.112	147.207	0.000992768	7.06471e-05
LINC01116	0.647667	0.551052	1.26837	3.45559e-05	4.00915e-06
RP11-876N24.3	0.470073	0.610244	1.32717	4.40695e-19	7.37551e-09
SNHG9	32.6043	39.4094	52.5406	1.03228e-10	0.000493091
CTD-2369P2.8	0.690575	1.12682	2.14217	6.96524e-10	9.51725e-06
AC005076.5	2.57683	2.49719	2.97917	0.00581531	0.00805225
RP11-7I15.3	0.946545	0.884116	3.01175	3.51164e-21	6.01773e-29
RP11-849N15.3	0.640035	0.608807	1.02584	0.000118977	5.07701e-08
RP11-609D21.3	2.43385	2.5058	8.23216	4.10246e-19	3.83278e-19
AC005786.7	11.0031	11.71	17.2923	4.78828e-13	2.90618e-12
TMEM161B-AS1	13.7674	13.0066	17.0576	0.000419991	4.79773e-06
PCDH9-AS1	0.612156	0.560522	0.88207	0.000375913	0.000268516
CTD-2659N19.2	6.18422	8.08268	11.0061	1.57066e-13	6.9457e-06
RP11-15L13.4	0.948723	0.967653	1.14004	0.0089601	0.00237794
ALDH1L1-AS2	1.08528	1.41976	7.38889	4.70741e-19	2.2973e-14
AC015936.3	9.19098	17.0017	34.8788	1.78009e-17	3.05814e-06
RP5-991G20.1	0.606333	0.570677	0.851529	7.04422e-06	8.24614e-08
AC016757.3	0.808999	0.648886	1.92239	2.3999e-07	4.94247e-09
RP11-38P22.2	6.83834	1.96723	12.3044	4.06423e-05	2.68406e-26
RMST	1.63853	2.26702	3.40398	5.17356e-07	0.00163579
RP11-768F21.1	0.654436	0.688854	1.17332	1.173e-06	4.87461e-08
DYX1C1-CCPG1	1.113	1.4655	1.95007	6.08049e-09	0.00126427
RP11-626G11.3	4.55445	7.02086	10.7583	7.44654e-21	1.97385e-09
LINC00152	2.0541	2.09727	12.0234	2.17814e-25	4.19449e-27
CTC-548K16.5	1.03785	0.903955	3.34344	1.21366e-14	6.96769e-19
LIPE-AS1	8.15803	10.6635	15.4295	2.84595e-15	1.97102e-08
RP11-767N6.7	2.11775	3.12798	4.14302	7.49682e-29	2.53602e-10
CTA-14H9.5	0.947338	1.21955	1.89474	5.46355e-06	0.00022319
CTC-332L22.1	0.510765	0.516724	0.731201	0.000830233	0.000769121
RP11-538P18.2	1.64966	1.59946	2.13521	3.10922e-05	1.60957e-06
AC092675.3	0.707915	1.24401	1.757	2.10961e-10	0.00754565
PVT1	5.22334	7.92055	22.9643	1.60126e-09	1.06369e-07
RALY-AS1	0.904427	0.786337	1.39535	4.06613e-08	1.13837e-11
AC147651.4	0.408608	0.57817	1.39922	2.40498e-19	3.78428e-14
RP11-775C24.5	1.94695	1.60387	2.4851	0.00203114	9.40496e-08
RP11-820L6.1	2.28902	2.01222	4.93345	8.65798e-05	2.24917e-06
RP11-12G12.7	2.70904	2.05044	3.32138	0.000141584	7.99042e-12
RP4-714D9.2	0.623405	0.907717	1.06753	2.78979e-23	4.25559e-05
RAB11B-AS1	5.80593	5.17566	7.42589	0.00290422	5.98311e-06
RP11-498C9.2	131.208	121.246	197.97	6.58488e-09	1.31398e-12
RP11-498C9.3	146.361	149.881	181.735	0.00127574	0.000667
AC005740.5	0.585834	0.510731	0.678226	0.00168223	1.99546e-05
RP11-801F7.1	3.83763	3.9363	6.80441	4.23006e-16	5.28162e-14
RP5-1024C24.1	0.441655	0.426505	1.57891	1.91871e-14	1.22382e-14
CTD-2647L4.5	13.0779	13.4464	21.4062	4.85159e-06	5.31622e-07
IGFBP7-AS1	11.0504	12.4199	26.8629	7.92941e-16	8.45237e-12
FOXD3-AS1	0.158842	1.26815	5.29382	2.11781e-18	2.26462e-09
RP11-1008C21.2	0.970063	0.781111	1.48636	1.97492e-06	9.54703e-13
RTCA-AS1	1.81501	2.39136	2.72924	4.82274e-09	0.0031624
CTD-3128G10.6	1.04954	1.1779	2.18084	1.46963e-15	2.10273e-13
RP11-516C1.1	6.63063	6.2113	7.25235	0.00325245	0.000441856
PHKA2-AS1	0.994463	0.779498	1.39328	0.000181123	3.41997e-08
CTD-2540B15.7	3.01605	6.51757	9.59443	1.08894e-12	0.00999977
RP11-159D12.8	2.27683	2.97397	3.80422	8.69199e-11	0.000573869
RP11-165J3.6	0.732262	0.941733	1.08003	1.1008e-05	0.00340782
RP1-261D10.2	0.73806	0.720249	1.2546	8.58472e-11	6.76775e-10
FAM181A-AS1	0.336994	0.652048	3.32358	6.98207e-18	9.15794e-13
RP11-362K14.7	2.52969	1.81093	3.64547	0.000353062	3.73494e-12
CTD-2325P2.4	2.21464	1.21755	8.46661	8.3785e-17	9.45363e-24
AC079742.4	28.8415	27.026	30.7817	0.0010883	3.50925e-05
RP11-723O4.2	0.70938	0.727239	0.947887	0.000686379	0.00270729
CTD-2341M24.1	0.5467	1.10301	2.79016	3.38571e-25	1.42962e-17
RP4-758J24.5	3.65814	4.96593	5.99291	3.3059e-13	0.000162404
LINC00856	0.646377	0.614743	1.1795	1.48313e-06	3.22761e-07
LINC00852	0.485997	0.493436	0.675986	7.9855e-06	1.26133e-05
SERTAD4-AS1	1.32637	1.15433	2.2161	3.20316e-05	4.30942e-07
SLC16A1-AS1	0.477759	0.64783	0.94157	3.46726e-17	2.43449e-07
U91328.21	0.549301	1.11793	1.58358	3.23242e-19	7.77067e-05
RP11-469M7.1	0.921593	0.939573	1.1942	8.57632e-05	0.000344843
AC022007.5	1.16766	1.02982	1.46575	0.000399463	4.30012e-08
RP11-467D6.1	0.505275	0.486192	0.681848	1.93663e-05	8.85232e-05
RP4-665J23.1	1.4946	1.39743	6.88889	3.27426e-21	1.13213e-24
GBM_LOC002313	0.901301	2.18574	3.2603	7.30833e-15	0.000792635
CTB-147N14.6	1.07061	2.5253	3.42833	5.08334e-14	0.000404702
RP11-203M5.8	5.90927	6.26748	8.36014	4.69127e-06	8.30738e-05
CTD-2510F5.4	1.216	2.22166	2.82089	2.19896e-11	0.000976084
AC009505.2	4.09237	4.67651	5.55655	7.17957e-05	0.00718016
AP001258.4	1.61156	1.32532	2.19405	0.00239827	4.80742e-10
LINC01158	46.3053	38.8678	58.2754	0.00532547	8.30515e-07
LINC01159	1.20459	0.772872	1.96102	9.34103e-09	2.45298e-20
LINC01150	0.357171	0.844312	1.1863	3.26023e-16	0.00841138
RP5-826L7.1	0.67598	0.902021	1.19714	6.97831e-08	0.00622145
LINC00665	8.67869	12.2028	15.7674	1.32518e-14	7.21626e-06
RP11-22N19.2	1.27468	1.22365	1.46052	0.00434769	0.00535018
RP11-876N24.7	0.799191	0.862341	1.43782	6.06175e-10	1.32136e-06
RP11-876N24.5	0.80232	0.665912	1.06651	0.00854284	1.61459e-05
RP11-679B19.1	0.525996	0.611414	1.04135	7.15734e-08	4.29202e-06
LINC01023	2.61261	4.01484	5.78531	8.98441e-17	1.30827e-07
CTD-2020K17.1	0.539969	0.676266	1.0033	5.78229e-08	0.000438017
CTD-2020K17.4	1.04365	1.42652	2.11169	1.24646e-12	2.44731e-05
LINC00998	36.7099	39.1002	55.2272	3.08672e-10	1.42955e-06
RP5-967N21.11	1.65366	1.71921	2.4845	8.06373e-06	1.20509e-05
RP11-473I1.5	3.57769	3.58341	5.04871	2.99615e-05	4.14104e-06
ITGA9-AS1	4.488	6.28883	8.26571	5.71445e-14	3.43999e-06
ABHD15-AS1	0.854376	1.3894	2.22596	1.48313e-06	0.00207332
RP11-316M1.12	53.7452	64.3515	96.8204	7.40428e-16	2.54801e-11
LINC00467	2.78737	2.02222	2.91688	0.00745795	3.45063e-06
LINC00869	2.01622	2.54043	3.44054	5.96252e-12	0.000543948
RP11-27M24.1	2.3883	1.80948	3.32979	2.01944e-05	1.55267e-09
RP5-940J5.9	1693.14	1668.8	2341.24	1.25196e-07	2.04795e-08
AC006115.3	1.11061	1.22338	1.75605	3.82273e-08	2.38295e-05
RP11-473I1.9	6.08763	6.25111	7.68166	1.51724e-07	7.14272e-06
AC010761.6	1.01944	0.850242	1.52968	1.36268e-07	6.82986e-12
AC015933.2	2.21773	2.12531	4.03383	1.05136e-08	1.43857e-08
CRNDE	0.681069	2.01642	16.0102	1.87233e-25	5.35726e-19
ZNF529-AS1	2.04549	3.30215	4.51617	5.77067e-20	0.000139799
HOTAIRM1	0.384289	0.603119	5.84701	1.82659e-18	4.65543e-21
SNHG11	11.4842	7.36342	14.5596	0.00025318	1.28462e-19
SNHG18	0.785307	0.387577	5.36189	2.12275e-26	5.80353e-34
RP11-689K5.3	0.534031	0.51747	0.917834	0.00619552	0.0032289
CTD-2540B15.11	9.11393	18.3178	27.9533	4.34721e-17	0.00115701
CTD-2265O21.7	1.89209	1.75323	2.39331	0.00299623	0.00074958
RP11-483H20.4	0.610583	0.609256	0.832868	0.000375913	0.00121995
HCP5	1.84676	2.21691	4.40067	6.70744e-12	3.93064e-08
RP11-642A1.3	0.448934	0.504753	0.702908	4.49664e-08	2.45458e-05
AC020594.5	0.782291	0.712635	1.08731	4.81806e-05	5.72772e-07
RP11-523G9.3	0.401954	0.55479	0.881678	6.52227e-13	2.07497e-07
AC009950.2	0.808644	0.938924	1.43891	1.66012e-06	4.28446e-05
CTD-3193K9.3	7.14844	7.22891	10.1154	0.00332591	0.00262505
AC007271.3	0.44393	0.526238	0.776476	0.000113477	0.00356296
ATP1A1-AS1	4.12835	5.29298	7.19134	1.51482e-14	2.1308e-08
RP5-1165K10.2	4.87616	4.73531	5.57353	0.00827794	0.00202168
LINC01235	1.02391	1.06219	2.93057	1.64715e-05	0.000324975
Cabili_2499	0.599882	0.930521	2.044	8.03749e-14	1.5357e-07
ZNF337-AS1	0.666938	0.632708	0.924022	0.00155593	1.12815e-05
RP11-864G5.3	3.74372	6.73936	9.51691	2.90606e-13	0.000245922
AC068831.6	3.61692	4.21096	6.04936	4.47368e-19	1.31398e-12
RP11-420L9.5	2.5249	2.33964	4.42457	1.77418e-06	2.41105e-10
LINC01057	1.0875	1.55392	4.542	3.51164e-21	1.89492e-14
NEAT1	34.5531	50.4017	82.5851	1.08085e-14	6.63625e-05
NDUFB2-AS1	0.484197	0.502558	0.654863	3.05224e-08	7.98195e-06
MIR22HG	3.24383	3.1021	6.18741	3.26487e-10	1.39218e-10
AC012507.3	0.498009	0.376042	1.51048	1.85622e-13	3.9462e-13
CTB-25B13.12	3.21126	3.66642	5.47896	2.99915e-10	1.15756e-07
AC006946.15	0.531324	0.475574	0.671613	0.0089601	0.000178145
RP11-223A3.1	0.488621	0.618889	0.790103	1.45451e-11	0.000821626
ALDH1L1-AS1	1.12794	0.989273	2.0942	5.22879e-07	1.43857e-08
SOCS2-AS1	0.618676	0.724207	1.60906	8.96655e-15	4.08699e-11
GBM_LOC035081	1.22041	1.41319	2.11321	5.81411e-13	1.61729e-11
AC074138.3	1.30495	1.67726	1.94003	2.1273e-09	0.00253903
RP11-267M23.1	0.497363	0.742069	1.16392	3.43573e-14	6.82824e-05
AC016747.3	3.66986	3.09408	4.93091	0.000871502	3.62211e-09
C15orf37	0.645803	0.772719	1.11584	3.97115e-08	1.60658e-06
AC005339.2	5.42771	6.67623	10.8532	8.33531e-11	1.50474e-08
ZNF503-AS2	1.23266	1.25893	2.03062	6.70744e-12	1.14478e-08
RP11-338K17.8	5.42354	6.62847	10.4832	3.97066e-15	1.01362e-08
LINC01137	1.13653	1.44519	2.15128	1.10559e-11	1.75045e-07
LGG_LOC001868	1.1295	1.61894	1.98412	4.95228e-11	0.0063712
ARSD-AS1	2.85621	1.63793	9.33022	3.85371e-25	5.86836e-34
Cabili_1919	0.92596	0.706632	1.46433	8.95986e-06	1.05648e-08
RP11-286H14.8	4.74265	5.33315	10.201	2.28529e-15	2.44062e-14
Cabili_2152	0.527181	0.51544	0.666069	0.000203142	5.3406e-06
RP11-732A19.6	0.952391	1.06713	1.54624	0.000413435	3.75994e-05
AC093673.5	7.3156	6.72977	15.3133	1.57657e-17	1.86523e-17
CTD-3099C6.7	0.459655	0.523924	0.786716	4.33668e-09	2.35185e-06
RP5-956O18.3	21.9034	26.7072	38.6332	3.54128e-22	1.26085e-10
RP5-907C10.3	0.822405	0.834419	1.78338	0.000434889	1.39689e-05
GS1-124K5.11	0.925844	0.93508	1.36149	3.05224e-08	1.49008e-06
CTD-2145A24.5	0.475609	0.487838	0.631074	2.94512e-05	4.25116e-05
RP11-73M18.8	9.77335	9.74215	12.0627	0.00197508	0.000222579
RP11-73M18.7	5.51037	5.50371	6.78695	0.000303943	0.000454256
AC009501.4	4.62882	4.3766	8.11387	1.82495e-16	1.04864e-18
DPH6-AS1	1.34886	1.14394	1.73262	0.00593774	0.000147539
RP1-178F15.5	1.75899	1.44034	3.01966	7.32419e-09	6.81878e-16
RP11-369J21.12	14.4835	13.6412	11.2421	4.34386e-07	0.00118768
NIFK-AS1	8.02487	7.62611	6.57759	0.000196009	0.00972051
AC027763.2	12.3072	12.5579	9.00866	7.66769e-08	6.45934e-10
AC005754.8	1.37557	0.797235	0.408726	3.01383e-11	1.15947e-05
AP001092.4	2.32301	1.37645	1.11478	2.96254e-10	0.00526484
DANCR	84.6213	76.4948	45.4111	1.67284e-15	7.74137e-13
MCM3AP-AS1	2.21828	1.53704	1.12243	1.45166e-10	0.00308393
CTD-2026K11.6	0.521941	0.564107	0.376818	0.0067483	4.72661e-05
RP11-454H19.2	2.01512	1.0959	0.750349	8.91301e-20	1.7284e-05
RNF219-AS1	4.11261	9.11795	2.0579	0.00478532	1.31398e-12
RP11-651L5.3	1.10743	0.956456	0.757248	4.49664e-08	0.00201373
AC003665.1	2.78908	2.33674	1.67946	2.6348e-11	1.22359e-06
CTD-3184A7.4	9.44961	9.06338	7.54498	0.000328799	0.00201373
CTA-250D10.19	2.69339	2.08382	0.991958	4.568e-09	2.07497e-07
RP11-123O10.4	2.17816	0.797492	0.00486535	6.41542e-10	0.0067059
CTA-390C10.10	0.795476	0.732152	0.532407	3.09549e-06	0.000138903
LGG_LOC019760	0.835305	0.538536	0.413673	9.33456e-11	0.00162775
RP11-158I9.8	2.07281	1.63608	1.17683	3.93259e-14	1.135e-06
AC093620.5	1.46689	1.42869	0.701636	7.34726e-06	4.87461e-08
RP11-455O6.9	0.715356	0.720799	0.250634	6.41542e-10	8.47379e-12
CTD-2515O10.5	0.99083	0.933566	0.6541	1.48313e-06	3.35571e-05
RP11-797A18.6	0.517374	0.53067	0.358615	0.00223203	0.000178639
RP11-412D9.4	1.96985	1.77061	1.233	1.36007e-09	1.05648e-08
CTD-2033C11.1	1.02376	1.13363	0.798049	0.00149693	3.19048e-06
RP11-661A12.8	0.639687	0.604837	0.464842	0.000128097	0.000893913
RP11-3P17.5	65.6933	62.8138	50.7674	0.000141584	0.000819519
CTD-2270P14.5	2.49286	1.87972	0.746115	2.02848e-24	3.71824e-21
RP11-161M6.2	170.115	139.247	32.2668	5.2293e-31	2.73533e-27
RP11-638I2.4	0.855866	0.969607	0.322213	8.38435e-09	5.81576e-10
AC083864.3	1.03523	1.73807	0.183855	5.72973e-18	3.32943e-27
SNHG6	187.909	176.637	112.528	2.48287e-16	4.95575e-16
RP11-435O5.5	0.506455	0.583807	0.33234	3.64385e-07	4.53336e-09
RP11-435O5.4	0.892828	0.933194	0.552602	0.000105018	3.57724e-06
RP11-483F11.7	1.89962	1.0247	0.738582	4.24144e-11	0.00367377
Cabili_2123	14.5922	12.5869	9.92595	7.38381e-11	2.93321e-06
RP11-94I2.4	0.726722	0.647319	0.289965	1.4191e-08	3.97736e-07
GBM_LOC025565	0.957936	0.584163	0.341348	1.82659e-18	8.06125e-05
RP11-981G7.2	1.01919	1.10968	0.568148	1.91374e-06	1.97102e-08
RP11-758H9.2	6.09502	4.85095	3.08732	1.35028e-17	3.9462e-13
RP11-797D24.4	7.46835	5.01231	3.20343	1.10381e-16	1.88137e-08
PVRL3-AS1	1.32801	0.826701	0.482141	8.40921e-15	3.11922e-07
RP11-46A10.5	1.49242	1.2798	1.04316	1.1945e-07	0.000790598
RP5-1068E13.7	2.08785	1.52703	1.14024	1.57067e-11	0.00686155
GBM_LOC037116	1.10316	0.803012	0.382779	8.6678e-18	1.79917e-10
CTB-58E17.5	0.963409	0.747719	0.485498	5.82102e-10	5.25219e-05
RP11-307B6.3	7.68788	3.43366	2.10738	6.58724e-22	0.000135374
TPT1-AS1	13.5159	13.932	9.21933	5.2306e-11	3.39842e-14
XLOC_078028	1.20508	1.13518	0.644855	1.29341e-10	1.27741e-09
LL22NC03-2H8.5	0.790605	0.492596	0.259983	5.63493e-15	4.72124e-09
RP5-1057I20.4	4.86364	4.5576	3.97259	0.00602445	0.00844364
RP11-281O15.4	1.04238	0.912945	0.734915	6.51935e-05	0.000454256
RP11-255H23.4	0.913995	0.926784	0.621718	4.81958e-07	4.6272e-08
RP11-700J17.1	1.06672	1.03906	0.758597	6.60716e-06	1.35661e-05
AC011524.1	0.720366	1.34843	0.299411	5.73704e-07	6.14969e-11
SLC25A21-AS1	4.87519	3.21099	0.461606	4.5553e-34	6.10209e-34
RP11-203J24.8	1.32207	1.25361	1.03686	0.000490212	0.00257301
RP11-152N13.5	2.1112	2.00523	1.06093	9.45358e-20	4.02503e-15
RP11-355O1.11	1.93347	1.79815	1.39891	0.000201427	0.00669484
RP11-365P13.5	0.57906	0.562306	0.375979	0.000373059	0.00129111
RP11-455F5.3	4.83838	3.9378	2.98247	1.46963e-15	6.2204e-07
RP13-941N14.1	1.39719	1.04401	0.843199	3.04825e-07	0.00136916
RP11-1055B8.4	5.14203	4.6304	3.08277	4.27404e-05	0.0049766
RP11-1055B8.3	6.15191	3.94794	1.4784	1.27384e-16	5.0008e-11
RP11-1055B8.8	3.25489	3.22384	2.24571	0.00107168	0.000390452
RP11-17J14.2	7.25078	9.56981	4.441	0.00670319	1.44996e-05
FLJ21408	0.710907	0.564463	0.375416	6.94097e-09	0.000216448
CTD-2545M3.8	4.66815	2.49774	1.27496	1.26383e-17	1.35702e-07
RP6-109B7.4	0.626462	0.567215	0.475321	0.000461639	0.0082822
FAM215B	1.4437	1.32797	1.11323	0.000262109	0.00686155
Cabili_102	1.77146	1.54858	1.31707	1.87994e-05	0.00300207
ZSWIM8-AS1	8.40573	8.46317	6.34053	1.22987e-06	1.14827e-07
RGMB-AS1	3.27738	1.83479	1.58381	1.17661e-18	0.00564472
C21orf49	2.50106	2.22628	1.42993	1.03228e-10	1.09976e-08
RP5-1007F24.1	2.81486	3.09663	1.01326	7.32465e-07	1.31398e-12
RP11-216L13.19	0.538818	0.646051	0.4293	0.00451448	1.00813e-06
U47924.30	7.72292	7.02544	5.67298	5.33694e-09	0.000970438
RP1-266L20.2	2.83675	1.89571	0.945157	5.7428e-22	1.02053e-14
RP11-95P2.1	1.64483	1.36298	0.962875	3.17143e-08	1.09434e-05
RP11-783K16.10	2.33214	2.04671	1.12496	7.84857e-07	5.59393e-05
GBM_LOC025161	1.70568	1.42388	0.331796	3.13709e-25	1.49131e-24
GAS5	216.316	200.879	113.646	4.00956e-16	3.85992e-16
RP11-656D10.3	0.930383	1.02707	0.59329	0.00169573	1.31247e-07
GBM_LOC004742	0.626708	0.588563	0.317151	1.66675e-12	7.59859e-12
RP11-395I6.3	2.4333	2.41216	1.46788	9.77698e-08	1.32687e-10
RP11-690D19.3	0.873408	1.12055	3.5767e-06	2.88325e-09	8.87976e-12
MALAT1	56.4168	58.034	39.0806	4.57977e-05	5.20199e-05
RP11-572O6.1	0.936593	0.585445	0.390772	1.16669e-08	0.00181203
RP11-318E3.9	1.34762	1.27282	0.824194	1.8075e-10	1.35929e-07
CTB-58E17.1	1.31213	1.29291	1.05186	0.000735631	0.000127852
FLJ37035	5.49369	3.95794	2.98414	1.76365e-20	2.8443e-06
XXbac-B461K10.4	12.0482	11.6535	7.03594	1.71099e-09	1.20137e-10
RP5-1021I20.1	5.05485	4.26401	2.19442	2.6348e-11	4.84853e-10
RP11-279F6.1	3.39428	1.61263	0.658393	4.18331e-34	9.82848e-19
Cabili_1756	0.968668	0.843721	0.481801	5.78906e-05	0.000404702
RP11-104H15.7	1.11846	0.897433	0.627133	2.04727e-07	0.000843869
LINC00643	7.85343	3.75925	1.71541	7.15537e-10	0.00202168
LINC00641	15.8381	16.8055	8.64405	1.01595e-11	4.38167e-13
AC000068.9	4.07672	2.97062	2.07809	3.49961e-15	4.30171e-07
AC016910.1	0.586618	0.522239	0.360472	3.9726e-12	3.60388e-08
CTA-204B4.2	4.07625	3.73297	2.60761	2.92127e-09	1.66722e-05
RP5-1119A7.17	6.00017	1.93106	0.405932	3.39222e-23	4.46419e-08
AP000255.6	1.04285	0.821892	0.430575	9.68039e-15	1.32298e-10
AC000068.5	0.922755	0.6477	0.384866	3.42688e-16	5.36622e-09
RP11-523H24.3	3.94915	3.37851	2.87143	2.88706e-05	0.00789316
ZNF213-AS1	14.1347	9.72269	7.79009	1.37197e-18	5.04021e-05
RP11-299G20.5	2.07604	2.09498	0.709985	3.77579e-08	3.73494e-12
RP11-445N20.3	1.52982	1.18125	0.800056	7.11124e-05	0.00413695
CTD-3193K9.11	2.20197	1.82184	0.907713	3.00247e-09	3.12921e-07
RP11-452L6.1	3.29276	2.66161	1.97157	1.05734e-15	4.78303e-06
RP11-452L6.7	2.72033	2.00781	1.32519	5.47774e-13	4.86692e-08
RP11-84G21.1	0.903179	0.869358	0.647161	0.000208998	2.46188e-05
AC099850.1	1.15571	1.1221	0.806524	5.47479e-07	1.05182e-06
RP11-351D16.3	0.730104	0.689832	0.338616	9.07837e-15	1.45733e-14
RP11-21A7A.3	13.6494	9.85458	5.11329	7.57205e-20	1.63609e-14
RP11-21A7A.2	9.07869	6.02157	2.72973	5.65249e-16	2.34118e-07
Cabili_1242	2.34908	2.16968	0.961648	2.44502e-16	7.72475e-13
RP11-574K11.5	26.4012	24.154	17.6219	0.000168133	0.000923344
RP11-461A8.4	0.512724	0.583618	0.441687	0.00740853	0.000613053
LINC00906	0.477159	1.16347	0.190534	3.59722e-05	9.93372e-14
TSC22D1-AS1	1.46547	1.63364	1.14167	0.00187052	2.82262e-05
RP11-359E3.4	0.696477	0.63961	0.33262	7.57205e-20	7.56739e-20
DKFZp434J0226	0.886343	1.04098	0.101528	1.50024e-12	1.62716e-17
RP11-166D19.1	32.0211	37.0669	26.4746	4.96079e-05	7.37551e-09
OTUD6B-AS1	19.9885	17.9563	14.7093	3.47187e-07	0.00118553
XXbac-B135H6.18	1.55415	1.21718	0.931339	5.13959e-09	0.0029988
RP11-725P16.2	1.60058	1.90772	0.669694	6.50253e-10	8.09899e-15
KB-1507C5.4	0.669028	0.703381	0.465911	0.000159711	1.53951e-06
MIR4697HG	14.9381	14.9903	6.51209	1.20948e-11	3.17303e-13
KB-1507C5.2	12.8824	12.3594	9.42382	4.16085e-09	1.87535e-08
RP11-457M11.5	1.39688	1.51246	0.902222	2.28033e-06	4.45724e-08
RP11-411B10.3	1.49211	1.22905	0.870522	1.05566e-09	0.000190132
RP11-227G15.10	1.51594	1.51124	0.898424	9.32606e-07	6.44803e-06
MAN1B1-AS1	2.6311	3.04221	2.13232	3.10922e-05	4.68208e-09
RP11-18I14.11	1.3113	1.06755	0.784854	1.70535e-10	1.22359e-06
RNF157-AS1	6.93463	5.39499	3.3796	2.38869e-13	1.04852e-06
LINC00938	4.30207	3.02901	2.163	2.6922e-20	1.95579e-06
AP001469.9	2.53653	1.73197	0.91376	1.37921e-21	4.34508e-13
RP11-334C17.3	0.816169	0.958441	0.596736	0.000620872	9.7888e-08
CTC-336P14.1	2.18354	1.97906	1.39594	0.000101016	0.000775654
DNMBP-AS1	1.47145	1.18409	0.392158	1.84602e-16	8.74502e-16
RP1-138B7.5	3.04841	2.52524	1.88487	4.31323e-05	0.00638175
RP11-482H16.1	1.63261	1.84316	0.866337	1.1814e-07	1.80449e-10
RP11-420A23.1	0.611723	0.597473	0.340554	7.66769e-08	4.98131e-06
MIR4519	5.04411	5.46766	3.89382	1.41388e-05	3.64173e-07
ZNF350-AS1	2.53975	2.81536	1.3003	3.34482e-06	1.97898e-07
AC003102.3	1.15045	0.471154	0.306184	8.94569e-27	9.46968e-06
RP11-731C17.2	1.65064	1.40504	0.92938	4.94448e-12	1.75607e-07
RP11-290L1.3	107.358	63.0025	32.1038	1.86625e-12	7.73908e-06
RP11-290L1.2	0.789099	0.509279	0.28416	1.6472e-13	6.74199e-07
RP11-996F15.6	2.86291	2.76997	2.19469	5.81001e-06	5.76129e-05
TNKS2-AS1	2.30664	2.35591	1.45178	0.00243592	0.000668243
NAPA-AS1	2.34505	2.45618	1.91752	0.00230299	3.72709e-05
RP11-111M22.4	2.37665	2.11884	1.26083	2.50599e-10	6.2204e-07
RP11-111M22.5	0.60542	0.508054	0.240469	1.68195e-10	1.60957e-06
RP11-18J9.3	0.604173	0.653142	0.25013	8.06373e-06	2.78042e-08
CTD-2547G23.4	1.13546	0.887225	0.638358	2.07657e-08	0.00330599
AC006460.2	1.17068	1.28374	0.982646	0.00902295	4.14104e-06
CTD-3064H18.4	0.990264	0.694019	0.1867	5.81092e-22	6.38525e-22
RP11-110G21.1	5.09317	4.61798	3.62107	2.43727e-06	0.00367377
RP11-329B9.5	1.79656	1.72918	1.29806	0.0058976	0.000949899
RP11-328J6.1	1.46505	2.39475	0.910969	0.000836291	2.27351e-10
RP11-98D18.9	3.442	2.36723	1.51261	9.34784e-18	9.00688e-08
Cabili_1038	2.66742	1.97697	1.16117	1.29658e-20	4.3655e-10
CTC-564N23.2	38.5496	39.3646	30.2387	4.48772e-06	9.26993e-09
TNK2-AS1	0.873611	0.600953	0.420357	3.9956e-11	0.000997863
RP11-98D18.1	4.83996	1.75925	0.877519	5.68833e-20	4.98523e-06
RP11-73C9.1	2.67159	2.87658	0.519505	1.19463e-18	1.98067e-23
AC007228.9	0.922647	1.05314	0.653683	0.00884364	1.44996e-05
RP11-298J20.4	2.16036	2.10549	1.4358	5.27226e-05	0.000391192
RP3-333H23.9	4.42608	2.50514	1.86715	9.84038e-16	0.00535914
RP5-984P4.6	2.57088	1.79708	1.08546	4.01109e-09	0.000104535
KB-1125A3.11	0.638826	0.498464	0.324616	1.78482e-09	0.000101383
CAHM	5.07431	5.28975	3.27489	4.02046e-08	1.13856e-06
RP11-359J14.2	0.676967	0.593387	0.459027	0.00019768	0.00291401
EPB41L4A-AS1	85.5808	56.2274	32.8841	2.83942e-31	3.01184e-14
RP11-149I23.3	1.9778	1.37276	0.951257	1.24646e-12	1.98951e-05
RP11-258F22.1	0.663515	0.656096	0.338211	2.00129e-07	5.29695e-11
Cabili_195	0.756011	0.602361	0.481568	3.43756e-12	0.00013511
AC002310.12	2.0401	1.78159	1.21823	5.41634e-14	5.36622e-09
EIF3J-AS1	11.563	10.7313	9.34818	0.000257454	0.00654969
RP11-999E24.3	16.0378	18.8898	11.1363	3.97853e-06	6.51695e-12
RP11-147L13.14	0.539694	0.734807	0.405104	0.00150824	1.16145e-09
RP11-304L19.12	1.40074	1.52297	0.527989	6.87545e-18	7.25586e-16
Cabili_1927	1.40989	1.04944	0.443844	7.44654e-21	4.42203e-18
RP11-46C24.7	5.03432	4.13681	2.85018	3.31574e-18	6.45672e-11
RP11-340F14.6	3.46569	2.79497	1.22074	4.29856e-17	1.39769e-16
Cabili_2592	0.619377	0.622738	0.408511	4.91277e-05	0.00119366
RP5-855D21.3	0.636031	0.678764	0.456815	0.000908595	3.60616e-05
RP11-1102P16.1	1.20625	1.15542	0.228598	1.49179e-14	9.13615e-18
TOB1-AS1	3.03561	2.0732	1.40776	1.10001e-24	2.05083e-08
GBM_LOC047769	4.0541	4.55883	3.20111	1.18518e-05	3.8814e-06
Cabili_2679	5.45748	4.47546	3.81083	7.38381e-11	0.00357132
RP3-406P24.5	0.607634	0.584291	0.302136	4.60632e-07	1.61459e-05
RP11-46H11.3	0.732743	0.539913	0.167593	6.60617e-20	5.42921e-15
RP11-441F2.5	2.20694	3.39763	1.29973	6.26221e-06	1.70451e-11
AC004623.3	3.15801	2.79	1.67599	2.73342e-07	2.20604e-05
AC004623.2	30.0399	30.6292	22.4169	1.81352e-07	3.44799e-08
MCCC1-AS1	1.7186	1.45635	1.08425	1.55316e-06	0.00175547
RP11-283I3.6	5.29809	5.66827	4.53428	0.00149693	6.92456e-06
CTD-2026G6.3	1.8958	1.23128	0.7993	3.97853e-06	0.00719198
RP11-714G18.1	0.759378	0.618767	0.296576	1.87999e-13	5.83344e-10
LA16c-380H5.5	2.43805	1.82106	0.909834	2.16807e-15	1.63916e-09
RP11-191L17.1	1.5174	1.60455	1.22378	0.00216311	0.00524089
LINC00925	37.2961	33.2731	6.1368	4.96103e-31	2.89874e-32
SERHL	2.33204	2.91452	1.15535	2.90362e-07	2.25767e-09
RP1-63G5.5	1.06227	0.745355	0.249546	1.01653e-14	1.79146e-11
RP11-256I23.2	11.7747	7.49641	6.22728	2.23391e-13	0.00292093
LGG_LOC020514	0.477995	0.647417	0.35416	0.00150824	4.08699e-11
ZNF571-AS1	3.60445	3.48254	1.44634	3.0401e-14	3.9462e-13
RP11-303E16.3	2.23077	1.7455	1.33544	9.22129e-07	0.00111545
RP11-463C8.7	0.997151	0.478157	0.153754	2.58335e-22	8.50499e-14
RP11-178H8.7	2.13589	1.96061	1.42369	1.10837e-10	1.26007e-08
RP11-175O19.4	1.95924	2.2329	1.59942	0.000172818	1.45591e-11
MIR181A2HG	0.999363	1.25548	0.651145	0.000680587	9.29941e-09
RP11-950C14.10	0.676214	0.605952	0.439246	2.60922e-08	1.30021e-05
RP11-108L7.4	2.67561	2.48353	1.23827	8.56742e-26	3.21546e-22
RP11-4B14.3	1.3034	1.23634	0.378316	8.43864e-12	2.14452e-08
RP11-128A17.2	0.817289	0.667968	0.341272	2.97084e-06	0.000222579
CTB-187M2.2	5.63435	3.3596	2.56435	1.35028e-17	5.43618e-05
RP11-128A17.1	4.96773	4.65283	3.58601	2.99615e-05	0.00192169
GBM_LOC006541	0.899097	0.808099	0.461621	0.00198972	0.00682768
RP11-144G6.12	2.69438	2.14716	1.42353	3.77e-11	3.73801e-05
Cabili_1904	0.908487	0.826361	0.330348	1.73117e-21	3.60865e-17
RP6-201G10.2	4.82139	4.63144	1.15569	2.12275e-26	2.1762e-27
CTD-2292P10.4	1.07325	1.20485	0.462207	1.85943e-09	7.50966e-10
STX18-AS1	3.6022	3.51702	2.76593	2.49826e-05	6.90349e-06
H1FX-AS1	7.83263	7.60462	5.78866	5.29588e-06	0.000167947
AC099668.5	0.960335	1.084	0.693957	0.0056925	0.00167108
RP11-328C8.4	3.61259	2.87676	1.89034	3.35232e-05	0.000123127
RP11-93H24.3	1.80459	1.47841	1.0467	2.50797e-08	0.000162088
ILF3-AS1	30.6073	23.3654	17.981	1.20787e-15	3.84099e-05
PRMT5-AS1	15.8365	14.5785	9.58141	1.01653e-14	1.75159e-12
CTB-152G17.6	1.17546	1.14754	0.981554	1.91844e-05	0.00564472
GBM_LOC001686	2.44405	2.58182	2.03176	0.00228506	0.000111655
RP11-285J16.1	0.970932	0.880603	0.485953	3.23532e-06	3.84099e-05
RP11-54O7.17	0.95509	2.72361	0.637092	0.00355906	4.95435e-18
RP11-54O7.16	0.832661	1.6271	0.170955	2.80934e-19	1.79531e-31
RP11-25K19.1	9.8016	9.40388	5.23745	6.70744e-12	1.18584e-11
Cabili_1318	2.15729	0.55512	0.255249	7.25322e-25	0.000250981
SNORA72	6.40423	5.80665	3.68773	6.10385e-14	2.31473e-11
RP11-535A19.1	1.24523	1.24166	0.767593	9.44502e-05	0.000174634
LINC00672	12.2802	10.4346	3.36314	7.44654e-21	4.34508e-13
ISX-AS1	2.15427	0.323691	0.00685388	1.00344e-18	0.00865562
RP11-47A8.5	2.18911	2.08418	1.34162	2.31093e-09	4.86692e-08
CTD-2396E7.9	28.531	25.7541	21.8743	0.000984582	0.00686155
RP11-508N22.13	1.42273	1.25849	0.490669	1.08085e-14	7.67109e-15
RP11-290F24.6	1.14668	1.07969	0.749379	5.53316e-07	1.05179e-05
RP11-169D4.2	1.11159	0.66274	0.27089	1.39531e-14	1.02206e-07
LINC01311	0.800246	0.705348	0.427477	2.51316e-07	4.41009e-05
RP11-326C3.7	2.62249	2.53087	1.47335	1.38713e-05	1.38849e-05
CTD-2541M15.3	1.43557	1.60799	1.159	0.0083326	5.21708e-05
RP11-434B12.1	2.04834	1.43677	1.20513	5.22879e-07	0.00807399
RP11-755B10.4	2.17309	1.69213	1.23622	2.58643e-09	0.00427207
PPP3CB-AS1	18.4008	14.3523	8.22067	3.47997e-16	2.08381e-10
AL161668.5	2.98318	2.30147	1.14179	3.3059e-13	5.36622e-09
LINC00689	2.73011	7.82959	0.325292	1.28647e-12	3.0243e-16
RP13-650J16.1	2.54196	2.9024	1.40504	6.22145e-07	4.16666e-09
RP11-799D4.4	0.975318	0.659088	0.494976	7.98435e-15	0.00427934
RP11-119F19.5	1.75086	1.88782	0.935443	9.44787e-08	2.30885e-12
RP11-341N2.1	1.6142	1.03506	0.634837	1.79672e-15	5.06061e-08
RP11-74E22.8	10.0118	5.1769	1.95473	1.18579e-26	6.89652e-08
RP11-133F8.2	2.99925	2.08347	1.00448	1.17314e-09	4.30942e-07
RP11-64K12.10	0.81807	0.520109	0.299401	1.21474e-08	0.00927982
RP11-74E22.5	77.9691	70.3961	62.7995	9.00771e-06	0.00972051
LINC00928	1.49206	1.7802	0.350143	6.76799e-12	3.0243e-16
RP11-75I2.3	3.68635	2.2153	0.831963	3.02537e-18	2.31473e-11
RP1-293L6.1	4.64058	1.00635	0.173956	2.03974e-34	9.84957e-11
RP11-646I6.6	1.52632	1.60381	1.16407	0.00619552	0.00042669
RN7SL832P	0.789724	0.681746	0.546054	1.81352e-07	0.00148563
RNF185-AS1	32.8163	31.5019	25.0799	4.23239e-05	0.00212761
GLYCTK-AS1	3.39954	3.29888	1.78757	7.19774e-12	2.27351e-10
RP11-506H21.5	1.3476	1.22831	0.908373	2.18778e-05	0.000162722
RP11-144G6.4	1.16178	0.986321	0.545978	1.04675e-10	2.72874e-07
RP3-402G11.28	2.75635	2.44228	1.81769	2.09981e-05	0.00218177
RP11-48B3.5	4.17396	3.79067	2.80224	1.99144e-09	1.25752e-05
RP11-400F19.6	8.10511	6.98606	6.37387	6.90996e-05	0.00564472
RP4-541C22.5	1.35286	1.2885	0.716851	7.32677e-11	2.44983e-06
AC113189.5	21.3703	14.4134	10.4828	2.82911e-15	7.98315e-07
TRAPPC12-AS1	1.37536	1.21486	0.843712	3.13813e-05	0.000222504
RP11-400F19.8	1.60858	1.63169	1.18973	1.80514e-05	1.36536e-06
RP11-182J1.17	1.34915	1.69604	0.962522	2.16082e-08	5.47987e-13
RP11-499P20.2	1.68694	2.34237	1.17027	0.000224685	4.37492e-16
RP11-91P24.7	0.836221	0.778315	0.645768	8.90176e-05	0.000520761
AC053503.11	5.89513	3.57724	0.780089	2.03974e-34	5.26996e-24
FAM201A	1.83357	0.944591	0.479805	1.2794e-10	3.03195e-05
YEATS2-AS1	3.30823	3.31932	2.58648	0.000498475	0.000466456
FLJ42627	4.23594	3.20666	2.24525	4.70741e-19	2.0776e-10
RP11-981G7.6	2.80644	3.0748	1.4823	3.49101e-08	1.11094e-09
RP3-525N10.2	21.1139	17.2613	9.94725	5.41634e-14	3.93064e-08
C10orf85	2.14941	3.62987	1.34798	0.000278541	9.87528e-12
CTB-129O4.1	2.66708	1.75813	1.13344	2.06579e-14	5.96484e-06
RP3-518E13.2	35.1869	15.9437	6.0093	5.38672e-26	1.22273e-14
PAN3-AS1	2.38787	1.81283	1.47978	3.5629e-11	0.00666495
CTC-351M12.1	2.23545	1.96669	1.51194	2.2767e-08	0.000118467
CTD-2554C21.3	1.93703	1.9804	1.28896	0.000578237	1.67895e-05
CTD-2554C21.2	0.897061	0.832656	0.534115	0.000762114	7.548e-05
RP11-660L16.2	9.65305	9.6404	7.00687	7.72655e-06	1.09103e-05
CTD-2410N18.4	2.17616	1.83313	1.53347	1.17314e-09	5.38429e-05
GBM_LOC004609	0.55589	0.623199	0.33107	6.07809e-08	3.85792e-11
RP11-15H20.7	1.35999	1.40661	0.99602	2.05925e-05	5.25132e-07
LL09NC01-139C3.1	1.35678	0.769255	0.498547	6.92211e-13	0.00109558
RP11-574K11.24	4.29601	4.07407	2.63577	2.65853e-09	1.19005e-08
LINC00173	2.19471	1.7301	0.929185	2.18415e-09	2.63993e-06
IDI2-AS1	2.29553	2.03275	1.68404	0.00178067	0.00889187
AC079305.11	2.14991	1.15683	0.0514684	1.63139e-43	1.88272e-43
LRRC75A-AS1	599.102	495.772	273.269	7.12991e-22	1.06943e-19
Cabili_1781	0.705611	0.616325	0.53852	2.9387e-06	0.00405765
AC010883.5	1.1545	1.01527	0.748839	1.69455e-06	0.000312663
KANTR	1.05152	0.971343	0.625139	3.47187e-07	1.18187e-06
LINC01521	2.58133	2.5197	1.55187	9.00771e-06	2.34118e-07
RP11-135A24.4	3.39321	3.17465	2.26912	3.05218e-05	0.000216448
AC012613.2	0.583777	0.67265	0.371576	0.000172818	3.46675e-09
RP11-120J1.1	8.66063	7.54378	3.80744	7.51878e-16	2.21689e-11
MIR219A2	10.6233	6.89906	1.88977	4.00717e-17	5.35441e-10
RP11-337N6.3	1.68914	1.39285	1.09232	2.38447e-06	0.00927982
MYCNOS	1.94094	1.40296	0.935576	1.38789e-12	8.00627e-06
Cabili_1493	8.41941	12.2028	4.23404	0.000680587	2.84605e-09
DIO3OS	0.976397	1.12889	0.635229	0.0036942	0.000796725
Cabili_378	1.70321	1.10692	0.716935	1.09757e-14	1.09103e-05
TOPORS-AS1	17.0499	15.3223	13.4274	8.56004e-08	0.00681244
LINC00237	12.4705	7.67098	2.26322	5.15294e-23	3.79554e-14
LL0XNC01-7P3.1	0.800654	0.57822	0.51581	2.66346e-11	0.00803911
RNF139-AS1	0.916628	1.0243	0.662835	1.66286e-05	2.53492e-08
GBM_LOC014495	5.73745	2.76063	1.82441	1.87356e-21	0.000108791
RP11-342M3.5	30.2774	26.7736	15.4047	1.29121e-09	1.28524e-09
RP3-523E19.2	0.722205	1.01146	0.413894	3.55e-09	1.54848e-14
Cabili_2300	1.5134	1.47947	0.798165	3.12925e-10	1.88781e-10
RP11-521B24.5	30.6931	33.5607	24.4213	0.00113456	7.72402e-06
LA16c-321D4.2	2.01289	1.85517	1.5802	6.60716e-06	0.000896199
CDKN2B-AS1	0.595638	0.686528	0.373783	0.00464809	0.00027886
Cabili_2898	1.89037	1.61254	0.839784	1.59756e-15	5.82352e-11
RP11-549L6.3	1.25032	1.26759	0.53828	1.86625e-12	9.72335e-15
RP11-264A11.1	0.466382	0.969196	0	1.1556e-10	3.16198e-23
AC105402.4	0.842549	0.850127	0.54414	0.00123547	0.00653889
RP11-445N20.2	2.36987	1.81742	1.33778	4.28055e-08	0.0014883
AC021224.1	12.2133	11.095	7.67037	3.5629e-11	2.72008e-09
RP11-73K9.2	1.16349	0.999408	0.862449	0.000388884	0.00552396
RP11-1391J7.1	0.697662	0.582373	0.37353	1.41106e-07	0.000251467
RP11-1081L13.4	3.27549	2.30958	1.46155	1.73117e-21	8.79658e-09
RP5-1177M21.1	3.74045	3.67176	0.422372	1.94302e-14	2.31848e-15
RP11-274B21.10	0.668841	0.630297	0.45588	0.00106346	0.00262505
RP11-278A23.1	0.722795	0.775541	0.471359	1.35775e-06	3.95143e-10
CTD-2083E4.6	2.42729	2.08761	1.5311	0.000461639	0.00236496
RP11-47I22.1	7.86659	2.29986	0.734622	9.49272e-18	5.48074e-07
RP11-446F17.3	1.454	0.891817	0.548936	1.52959e-20	1.24941e-07
MAPT-AS1	6.53289	5.42785	1.74287	2.4553e-18	1.00259e-19
RP13-514E23.1	5.02565	4.99038	2.8282	7.6739e-10	1.98012e-10
RP11-398C13.6	1.78268	1.46212	0.692172	1.79269e-27	2.10535e-19
RP11-582J16.4	0.632291	0.587703	0.442296	9.21332e-08	8.61234e-06
ACVR2B-AS1	0.756837	0.639534	0.368262	1.32505e-12	1.96039e-12
RP11-426A6.5	10.9881	10.4304	8.95408	0.000128097	0.000416112
RP11-567M16.6	6.49017	5.51817	3.87344	1.1814e-07	2.19409e-06
MORC2-AS1	3.85296	3.9253	2.58835	2.33175e-11	5.20115e-13
RP11-79P5.9	2.77193	2.18009	1.69805	2.02716e-10	0.00105876
RP11-429B14.4	5.8311	7.62908	1.73469	6.53454e-18	1.15615e-23
RP11-295H24.4	1.97028	1.62253	1.3261	2.60571e-07	0.00906412
CTD-2132N18.4	2.59339	2.88398	1.4725	3.94993e-13	1.33084e-15
RP11-574K11.32	18.8144	16.3482	11.4886	1.90434e-19	3.78986e-14
RP11-258C19.7	6.36177	4.95395	2.89601	1.66608e-17	3.69424e-11
RP11-116N8.1	3.39226	4.0798	1.52354	1.45358e-09	5.97792e-16
RP11-113K21.4	0.698498	0.679862	0.507116	0.000165381	4.89293e-05
LINC01532	2.68313	4.95412	2.64962	0.00201725	0.000168881
CTD-2560E9.3	1.2046	0.944168	0.708696	2.88212e-12	2.06479e-07
ZNF32-AS2	1.66458	1.41545	0.812623	5.60565e-12	1.06657e-09
ZNF32-AS1	44.4003	34.7927	24.623	2.01909e-25	1.32179e-16
RP11-624M8.1	5.12143	5.66945	1.74618	2.26315e-10	6.91915e-13
LINC00599	8.67838	3.389	1.05413	2.58229e-23	8.06821e-09
RP1-167F1.2	0.644612	1.23102	0.43997	0.0010883	1.13837e-11
ID2-AS1	3.53012	3.96663	2.55952	0.00043844	5.14415e-06
RP11-839G9.1	0.850659	1.50496	0.356383	3.19379e-09	9.63955e-17
TMCC1-AS1	4.34924	2.96655	1.9856	6.30262e-17	4.36209e-09
RP11-115C21.2	4.87735	4.31164	3.09965	6.51554e-09	1.83246e-07
CCND2-AS1	3.45045	3.67597	2.74408	0.00337185	0.000131305
RP5-882C2.2	3.54223	2.61589	2.18476	1.51774e-10	0.0070056
DLG5-AS1	1.80351	1.91986	1.24337	0.000347094	3.7795e-08
Cabili_2084	48.4085	29.4177	10.6669	6.87545e-18	1.1922e-11
RP11-521C22.2	0.577172	0.556247	0.271027	2.62004e-16	2.60443e-15
RP11-104H15.8	4.30014	3.1843	2.11312	1.36268e-07	0.000865707
RP11-728F11.4	2.28097	1.49702	0.419063	1.4526e-22	1.02552e-16
RP11-229P13.23	40.0667	13.0909	9.09204	7.57205e-20	0.00330029
NOVA1-AS1	1.57293	1.89356	0.573601	1.12303e-05	1.87692e-11
PDCD4-AS1	3.51554	2.63476	1.79994	3.07891e-14	2.33713e-07
Cabili_1510	1.9979	1.61401	1.13813	1.20948e-11	1.66389e-05
RP11-543C4.1	0.826205	0.727878	0.407768	4.43915e-11	1.41224e-09
RP11-46J23.1	1.61296	1.6839	1.00834	9.00771e-06	9.82024e-08
RP11-680F20.11	1.13757	0.95278	0.375022	1.29121e-09	1.05648e-08
LA16c-380A1.1	1.85052	1.2925	0.875397	1.38789e-12	1.01391e-05
LGG_LOC021000	2.52495	1.47879	0.726673	1.93288e-19	2.41083e-11
BACE1-AS	8.18456	8.69815	7.112	0.000450283	6.20537e-06
LINC00205	8.11763	7.42587	5.76406	1.12303e-05	0.00118255
PAXBP1-AS1	2.76503	1.84468	1.57207	9.04468e-20	0.00622145
LAMA5-AS1	1.95941	1.43895	0.901801	3.02099e-08	0.000480051
CTD-2561B21.11	0.971242	1.0676	0.338648	6.59184e-13	1.19219e-15
CADM3-AS1	52.2443	43.973	43.4637	0.000246304	0.00351476
RP11-103H7.5	9.59766	7.25204	2.89384	1.37897e-13	5.5821e-09
LGG_LOC046950	0.501421	0.915734	0.250592	5.96298e-05	2.59156e-09
FAM13A-AS1	0.488638	0.624022	0.373279	0.000534059	2.89731e-08
GBM_LOC042831	1.11564	1.58906	0.455462	1.66417e-08	5.60894e-14
FLJ20021	15.6413	12.4169	10.5893	1.02699e-11	0.00471885
RP11-179A16.1	0.904451	0.533233	0.273187	1.87999e-13	3.67024e-07
RP11-111F5.4	6.1727	5.31015	4.13173	1.79382e-07	0.000324975
CTD-2545G14.6	6.20603	6.06884	4.3106	0.0010883	0.00323595
RP11-253I19.3	0.553121	0.521335	0.380021	5.81001e-06	0.000138903
CYP17A1-AS1	5.84348	3.32094	1.08978	7.79906e-34	1.4278e-20
RP11-259K15.2	3.64506	5.39651	1.40769	2.48839e-07	1.09155e-11
PCAT6	4.7568	3.99808	2.80777	5.89059e-11	4.73598e-05
RP5-850O15.4	1.8573	2.29851	1.47115	0.00337185	7.30902e-05
RP11-182J23.1	1.45355	1.68953	0.393054	5.55996e-13	1.70603e-14
RP5-1056H1.2	9.05293	9.29868	0.516755	2.03974e-34	4.48851e-37
PARD3-AS1	1.43316	1.14895	0.488982	1.99116e-12	7.5238e-08
DGCR9	3.81641	2.333	0.80511	1.22592e-22	6.28408e-14
LA16c-429E7.1	0.816375	0.891015	0.63642	3.35232e-05	9.7888e-08
DGCR5	7.68631	4.67678	3.01349	1.95198e-11	5.56761e-06
RP11-392E22.12	0.848003	0.706113	0.427542	0.00112589	0.00654969
RP11-247L20.4	13.8764	11.4185	8.90227	3.09962e-13	1.98357e-05
RP11-676J15.1	2.4788	3.19196	0.824022	1.58443e-10	1.00996e-12
RP11-774O3.3	3.62484	3.63931	2.74868	8.42316e-07	7.84532e-08
RP11-373N22.3	0.870633	0.596799	0.424154	1.41686e-14	4.8328e-06
TRAF3IP2-AS1	38.9948	33.9113	23.0299	4.81193e-12	2.17362e-09
LIFR-AS1	3.64588	3.39153	2.43545	1.23945e-07	1.66722e-05
NKX2-2-AS1	15.8658	11.1615	8.11219	2.02292e-08	0.00607493
LGG_LOC036929	1.54524	1.16207	0.270585	2.10977e-17	1.63442e-14
RP11-973D8.5	1.03417	0.965052	0.445304	1.59756e-15	7.28828e-13
Cabili_1079	1.6313	0.691674	0.0389148	5.58204e-10	2.52828e-05
CTC-203F4.2	3.02645	2.19448	1.80524	8.67148e-10	0.00464283
RP11-127B20.2	5.03505	4.5683	3.09512	0.000529484	0.000426846
RP11-139H14.5	0.897397	0.882923	0.645525	5.78906e-05	0.000105333
SOX21-AS1	6.71919	6.59396	4.79574	0.000461639	0.000144484
RP11-441O15.3	0.847183	0.610116	0.359442	3.70833e-24	2.5144e-10
RP11-69M1.6	1.05427	1.07304	0.668446	3.90798e-09	3.17074e-08
RP11-140A10.3	1.8887	1.09597	0.824578	1.54835e-11	0.00686155
RP5-1198O20.4	7.82697	7.75799	4.88648	9.96822e-09	5.07032e-07
RP11-182J1.1	1.78526	1.8972	1.29011	1.82357e-05	4.09462e-08
RP11-73E17.2	2.46792	2.06284	1.42203	2.96254e-10	9.72302e-07
RP11-220C2.1	4.01066	1.65021	0.490023	4.05903e-28	7.26569e-15
RP4-719C8.1	1.66007	0.929075	0.627512	2.10961e-10	0.000574947
BAIAP2-AS1	14.9323	15.3386	11.8902	0.000670258	9.18323e-06
Cabili_159	16.1663	13.7808	8.84896	4.79163e-08	1.04852e-06
CTC-524C5.2	7.25541	6.35914	4.62551	8.14711e-08	3.60616e-05
RP11-277P12.20	0.618807	0.828375	0.279174	5.17372e-08	4.40752e-12
RP11-815I9.4	1.01317	0.907401	0.614229	9.96822e-09	2.26043e-06
RP11-212P7.2	5.69647	4.66272	3.06352	3.9956e-11	1.27309e-06
RP11-132F7.2	1.46036	1.03441	0.170488	2.71193e-26	1.32504e-22
MIR503HG	1.72882	1.44713	1.06473	0.00585494	0.00563868
CTA-29F11.1	12.5427	9.86161	6.70427	9.20524e-11	6.00128e-05
Cabili_1219	1.00317	1.03006	0.613016	0.000218807	8.58623e-06
SNHG21	6.96235	6.62264	5.31364	0.000152529	0.00375663
RP11-1182P23.5	0.932554	0.731353	0.391141	2.84595e-15	1.69769e-09
RP11-321F8.4	0.711459	0.597501	0.421175	7.62943e-09	0.000402862
Cabili_1858	4.5533	3.9031	1.12298	4.63072e-11	3.45412e-10
CTD-3110H11.1	1.29536	1.05205	0.606924	6.07535e-07	6.2159e-05
ARHGAP31-AS1	0.879554	0.842461	0.517507	2.10204e-09	2.01511e-06
AC140912.1	2.07698	0.819687	0.579596	1.13603e-15	0.00463216
RP11-368P15.3	3.59375	3.38374	2.33232	3.58228e-08	5.96911e-07
WDR86-AS1	1.00806	0.568159	0.32746	2.16807e-15	3.30785e-06
RP11-13N13.2	2.87643	2.2063	1.85573	1.973e-14	6.82824e-05
RP11-680F20.12	3.33719	2.83948	1.27743	6.62166e-11	3.02873e-08
TMEM254-AS1	2.93162	2.44066	1.51859	2.27282e-16	9.87528e-12
AC068831.10	0.758016	0.726405	0.457713	1.02699e-11	7.1803e-08
CTD-2396E7.10	263.191	198.544	174.115	0.000231127	0.0032436
RP11-112J3.16	1.4791	1.46549	1.012	9.00771e-06	0.000114591
RBFADN	1.11341	0.947498	0.639807	7.38381e-11	1.36536e-06
LGG_LOC030946	0.931305	1.29515	0.122911	2.76367e-22	5.59844e-31
INTS6-AS1	4.10086	4.44156	2.88593	3.63047e-05	1.44318e-08
GBM_LOC045448	1.11233	0.637357	0.136001	2.68887e-14	3.9723e-06
RP3-399L15.3	3.20059	2.22307	1.59676	4.74253e-12	0.000667
SATB1-AS1	2.37736	2.67488	1.17781	1.83104e-06	1.79899e-08
SVIL-AS1	22.4796	22.1802	15.1095	0.000477923	3.86351e-05
GBM_LOC032075	0.535396	0.677574	0.3829	0.000168133	1.48543e-06
RP11-54O7.3	1.75743	2.77715	0.266869	1.14921e-28	6.96022e-36
CTD-2349P21.10	0.619246	0.542373	0.37636	9.82686e-06	0.00181523
RP11-284F21.7	183.269	177.211	75.1376	1.02699e-11	7.17819e-11
CTA-223H9.9	0.853816	0.588083	0.281855	2.2617e-12	2.20604e-05
RP11-298P3.4	2.7428	3.0146	2.30568	0.00107168	6.46147e-07
RP3-466P17.1	1.89917	1.25363	0.56946	9.25735e-25	7.96313e-18
RP3-466P17.2	3.05417	2.18867	1.125	4.64429e-17	3.01901e-08
CTC-458G6.2	1.30685	0.724356	0.107394	2.65029e-18	1.89492e-14
GBM_LOC039589	0.538428	0.570448	0.313003	5.48585e-14	2.38816e-19
RP11-602N24.3	1.36983	1.37617	1.01789	0.00290422	0.000127852
RP5-855D21.1	0.764336	0.636143	0.383605	7.66769e-08	8.29102e-05
RP11-362J17.1	0.739231	0.56555	0.379437	7.72444e-11	3.56622e-06
RP11-31F15.2	0.548896	0.832201	0.514004	0.00761154	1.65363e-12
GBM_LOC042318	1.79934	0.468935	0.424362	1.94302e-14	0.00225647
CTD-2524L6.3	2.64333	2.41624	2.10767	3.95594e-07	0.000132042
RP11-15I11.3	0.457941	0.883961	0.240645	0.00018446	1.37151e-14
AC092171.2	0.79081	0.715791	0.452639	1.19663e-05	2.10603e-06
CTD-2371O3.3	2.71416	2.22395	1.77524	8.81347e-07	0.00132563
AC000068.10	1.60583	1.05366	0.516485	2.42795e-23	4.22641e-14
AC114730.3	8.07372	6.15673	3.03708	1.57245e-07	0.00217794
GBM_LOC039272	0.716812	0.755625	0.352649	3.24081e-08	1.56386e-08
RP11-347C18.5	1.35804	1.24252	0.88191	7.24174e-07	4.12988e-05
LINC00235	0.599575	0.642137	0.36235	3.55e-09	5.0536e-10
RP4-647C14.3	3.97411	3.03971	2.13985	0.00120879	0.00809182
RP11-334E6.3	4.77177	4.21277	2.97051	7.66769e-08	8.85232e-05
GBM_LOC005796	0.733931	0.785852	0.343406	3.70059e-09	1.11509e-09
Cabili_1725	1.81817	1.57582	1.22599	0.00270837	0.00405765
LINC01287	2.93258	2.30046	1.03347	3.92869e-20	1.05707e-12
RP11-1017G21.6	1.64304	1.15238	0.78791	2.02066e-12	4.25559e-05
RP11-1017G21.5	3.46852	2.54723	1.86729	9.67274e-17	4.58327e-05
RP11-517O13.3	0.588203	0.576689	0.436332	1.15843e-11	1.87692e-11
RP11-84C13.2	0.666721	0.799092	0.414353	0.000331719	2.43666e-08
GBM_LOC025187	6.92218	1.95147	0.0461927	9.03605e-33	4.59298e-24
CTD-2595P9.4	1.03421	1.02873	0.371906	2.55334e-12	8.87163e-14
RP11-394B2.1	165.785	121.553	89.2614	1.91061e-15	6.44803e-06
RP11-589P10.5	1.99669	2.20475	1.44424	0.000224685	4.14104e-06
RP11-550I24.2	1.32386	0.899235	0.571562	2.55334e-12	5.15995e-06
RP11-196G18.24	4.28737	7.24383	3.16433	0.000454211	3.01333e-20
RP11-196G18.23	3.83636	3.21129	2.64258	3.20423e-08	0.00359879
RP11-196G18.22	1.79083	2.90012	1.29869	0.000281037	2.0516e-18
RP11-640N20.4	0.749607	0.694142	0.537582	2.35848e-06	0.000244387
PITRM1-AS1	1.18574	1.27009	0.783483	2.54287e-07	1.21994e-09
AF131216.5	5.68596	3.77691	1.75633	6.07639e-16	4.13935e-07
LYPLAL1-AS1	1.08031	1.07912	0.836106	0.0089601	0.000898492
RP11-15H20.6	5.08661	4.89464	4.01886	0.000303943	0.00206328
AC005519.4	1.65853	1.61086	1.01328	0.000250918	0.00129487
RP11-158M2.4	1.20817	1.28806	0.459672	3.19379e-09	5.01525e-11
CTB-25B13.5	0.971736	1.00787	0.611313	1.22468e-07	1.22135e-06
RP1-179N16.6	1.12763	0.958668	0.460044	9.07837e-15	2.31473e-11
RP11-131L12.4	0.921647	1.12862	0.731673	0.00158112	2.8443e-06
AP001437.1	1.79161	1.56093	1.2069	3.22641e-05	0.0080608
RP11-667K14.3	2.48245	2.15054	1.67771	1.66675e-12	1.54794e-09
RP11-983P16.4	13.1258	10.6467	8.90394	4.51975e-09	0.000381745
RP11-348N5.9	0.831284	0.841684	0.457762	1.08085e-14	3.97916e-14
RP11-238F2.1	1.23001	1.35381	0.530705	8.00034e-10	1.1117e-09
LINC01089	17.083	16.4718	8.80711	5.81411e-13	1.69601e-10
AC144831.3	0.889383	0.804447	0.528415	2.68919e-06	0.000115563
RP11-1134I14.8	4.05926	3.36518	1.85301	1.29658e-20	8.85716e-12
AC073283.4	5.0523	4.04886	1.61024	9.23196e-26	1.41621e-24
RP11-87C12.5	4.52607	3.29723	1.69928	2.3878e-22	8.87163e-14
GBM_LOC028295	0.81445	0.643567	0.081534	7.14714e-21	4.76959e-15
GBM_LOC028297	1.13361	1.78432	0.098257	3.82504e-13	1.40234e-22
LA16c-316G12.2	4.3418	3.59347	2.67196	6.07809e-08	0.00322334
LGG_LOC007388	0.464373	0.760223	0.314831	0.00389782	3.52375e-12
RP11-468E2.10	2.08739	1.90271	1.37298	1.13961e-07	1.15947e-05
RP11-468E2.11	3.69414	3.27894	2.54609	4.01109e-09	2.11806e-05
RP11-432J22.2	1.07414	0.848837	0.552597	2.58682e-13	1.27309e-06
RP11-326I19.2	1.01988	1.18782	0.651056	2.99915e-10	1.13206e-19
RP13-516M14.1	6.59258	5.69	4.20913	4.11686e-09	9.17139e-05
RP11-158M2.5	0.99891	1.13016	0.335215	4.00067e-13	3.3867e-17
RP11-503P10.1	2.11778	2.21432	1.69359	0.0019461	7.68562e-06
RP11-87H9.5	1.12743	1.07174	0.692971	7.42496e-06	0.000216203
RP11-2E11.5	1.90732	0.947953	0.504302	7.57205e-20	4.49257e-07
GBM_LOC046797	3.40869	2.44147	1.95833	4.8742e-09	0.0023081
RP11-177H2.2	0.665466	0.630942	0.249773	9.70652e-14	1.6728e-13
CTB-158D10.3	5.88203	5.15553	3.95932	0.000286263	0.0039847
DPP10-AS1	1.80808	1.83294	0.803249	2.68919e-06	1.35929e-07
RP11-707G14.7	0.927558	0.654844	0.444748	3.5211e-17	1.61523e-07
RP11-247A12.2	0.983852	0.73357	0.492567	2.4553e-18	4.78303e-06
RP11-819C21.1	1.22925	1.0385	0.858288	8.28701e-09	0.00180884
DICER1-AS1	12.8378	9.90005	5.16519	6.08605e-22	5.28162e-14
RP11-192H23.5	800.741	538.72	270.731	2.40315e-12	1.72567e-08
Cabili_1456	5.99634	5.73431	2.90946	9.53315e-15	9.63955e-17
WDFY3-AS2	8.91939	8.33822	4.96791	6.7213e-08	6.61293e-08
GBM_LOC005589	0.78974	0.63692	0.220103	2.61771e-21	1.47706e-18
RP4-669P10.16	2.88795	2.50826	1.35709	1.45302e-16	1.13837e-11
CTD-2562J17.9	8.18852	7.03186	5.15388	0.00135855	0.00316988
RP11-219B17.3	0.679275	0.867148	0.482199	0.00124559	2.62827e-07
GBM_LOC030373	1.0193	0.774009	0.494953	4.568e-09	0.000945749
RP3-430N8.11	57.5429	47.3091	38.7384	1.34641e-10	0.000416112
AC010649.1	12.134	9.04734	3.56445	3.43756e-12	1.01685e-08
RP11-649A18.12	0.761166	0.605721	0.464666	9.77698e-08	0.0014883
RP11-21L23.3	1.76097	1.02824	0.703179	3.93259e-14	0.0049766
RP3-508I15.9	3.09054	2.77934	2.10137	7.84857e-07	1.05819e-05
CH17-140K24.6	1.97401	2.12134	0.76502	7.6855e-07	2.53492e-08
RP11-122K13.12	1.21775	0.999744	0.768253	4.38917e-06	0.00170591
RP11-343J3.2	1.77878	1.36859	0.432659	2.00844e-11	4.54752e-09
CTD-2201G16.1	4.11161	1.13761	0.831516	2.59936e-19	0.00785003
RP11-343H19.2	4.55529	4.38384	2.35239	2.80012e-05	3.02593e-05
IBA57-AS1	0.786863	0.64643	0.417016	1.24266e-06	0.000355202
ZNRD1-AS1	2.63143	2.07639	1.41134	2.03168e-13	1.20457e-07
RP11-688G15.3	15.9987	17.0648	12.0585	7.72655e-06	2.94027e-10
RP11-16N11.2	2.32539	1.27889	1.01572	5.01636e-22	0.000105036
RP11-38L15.2	2.71963	3.32621	1.69029	2.57941e-10	6.05375e-19
SCARNA9	2.88388	1.71392	1.03261	1.93388e-15	9.72302e-07
CTC-559E9.8	3.82553	3.55226	2.56297	1.27945e-08	1.42955e-06
SNHG1	81.8685	62.7145	30.3868	5.20213e-23	1.69819e-18
LINC00680	7.97018	7.93369	5.87695	0.000291409	3.59904e-05
SNHG8	116.928	87.502	68.2695	4.03224e-15	0.000195012
RP11-323F24.3	0.767669	0.801275	0.457607	3.64385e-07	2.07141e-07
RP11-420N3.3	4.02268	2.90428	1.64281	6.59184e-13	2.61957e-05
LINC00839	6.43109	3.49564	1.5411	6.35351e-12	2.45745e-06
RP11-553L6.5	70.8551	62.4372	41.1066	2.66346e-11	5.36622e-09
RP11-513M16.7	5.33657	4.5238	1.9284	2.51588e-14	5.69433e-15
RP11-946P6.4	0.89969	0.449831	0.41943	5.20659e-09	0.0090987
ZFAS1	185.446	175.429	106.294	1.69197e-17	3.40498e-16
CTD-2196E14.9	11.8721	9.36743	7.33772	2.43727e-06	0.00109558
RP11-357K6.1	5.0459	1.90802	0.427904	1.07667e-27	1.19902e-13
RPARP-AS1	9.22536	6.87523	4.34733	5.30739e-22	3.69424e-11
ATE1-AS1	2.01717	1.71801	1.34058	5.43491e-05	0.00535018
CTC-255N20.1	1.18894	0.560587	0.354115	1.13499e-14	0.000668243
GBM_LOC006520	1.66611	0.456955	0.120105	2.12055e-27	4.34857e-09
GTSE1-AS1	1.827	1.19608	0.729272	3.42688e-16	3.63079e-05
GBM_LOC047199	0.791663	1.03449	0.125765	8.51379e-15	1.98067e-23
RP11-347I19.8	2.62794	1.9371	1.28901	1.06365e-08	0.000157998
FAM212B-AS1	1.89312	1.82332	1.06712	1.60126e-09	2.6367e-07
RP11-59C5.3	0.984909	0.784912	0.398213	5.46468e-19	9.93372e-14
RP1-85F18.6	4.8952	4.53599	3.65743	1.47037e-06	0.000131305
RP11-347I19.7	1.33785	1.1835	0.739901	5.89059e-11	2.7375e-07
Cabili_134	2.20931	2.30196	0.922446	1.48717e-05	6.14101e-09
TRAM2-AS1	10.5048	9.70093	8.15442	7.24174e-07	0.000970438
CTD-2530N21.4	2.11614	1.88234	1.22348	2.00132e-13	8.97807e-08
GBM_LOC039943	1.02168	0.742541	0.524229	1.70899e-07	0.00524089
RP11-68I18.10	0.906976	0.637562	0.3215	1.16134e-22	5.10711e-15
AC016700.5	5.0423	3.42264	2.49389	1.14305e-12	8.57572e-05
GLIDR	3.57985	3.05654	1.9745	3.05224e-08	0.00013511
CTD-2562J17.6	8.05465	6.22227	3.57285	9.52847e-05	9.53669e-05
RP11-380L11.4	4.13725	3.66564	3.01143	1.66286e-05	0.0090987
RP11-23J9.4	1.16376	1.08707	0.838492	0.000344046	0.00552396
AC002429.5	1.57018	1.67607	0.426631	2.55334e-12	3.58621e-14
RP11-379L18.1	2.75701	2.4244	1.22362	1.0157e-07	3.04302e-08
RP11-158K1.3	1.05219	0.918019	0.756037	4.62769e-09	0.000111341
RP11-391M1.4	8.13817	7.85245	4.4698	1.76365e-20	2.10535e-19
CTB-1I21.1	1.71999	0.845579	0.0681203	4.16439e-19	1.50594e-15
MANEA-AS1	0.618588	0.594276	0.343411	7.66769e-08	1.15747e-07
GS1-72M22.1	1.8056	0.975963	0.526562	2.23391e-13	3.28137e-05
RP11-231C18.1	25.5364	18.7381	1.19369	1.55741e-30	5.14977e-32
WAC-AS1	17.1622	16.2212	11.6247	9.15761e-16	3.33857e-11
AC114271.2	0.860721	0.72109	0.58882	7.66769e-08	0.00405765
AC097724.3	3.39594	3.93128	1.40085	3.07891e-14	1.48028e-19
LHX5-AS1	7.28707	0.448115	0.00409602	1.01329e-37	1.91435e-15
RP11-848P1.5	2.21805	1.74362	1.41294	1.97492e-06	0.00192507
RAMP2-AS1	3.24012	2.49874	1.35051	3.20423e-08	1.79175e-05
AC096772.6	4.569	4.04241	3.29089	0.000118977	0.00250384
RP11-358L22.3	1.96782	1.80853	1.13116	3.36525e-09	2.78862e-10
RP11-762L8.6	1.52537	1.39484	0.926239	8.14711e-08	8.63567e-07
GUSBP11	6.16676	6.1939	5.24533	0.00249342	0.00384183
CTB-66B24.1	0.661355	0.57396	0.40973	0.000142899	0.00476532
HIPK1-AS1	0.528214	0.592677	0.352859	0.00023308	1.22743e-06
AC012442.5	1.56987	1.56455	1.11764	1.67725e-06	7.70902e-06
LA16c-313D11.12	3.13438	2.55608	2.20845	3.07359e-12	0.00223869
CTD-2517M22.14	4.82519	4.26768	3.52766	8.24637e-05	0.000706103
GBM_LOC025944	0.659717	0.630366	0.341517	3.81372e-07	2.7551e-07
MYLK-AS1	1.93457	2.23731	1.61962	0.00811589	2.55087e-05
RP11-119F7.5	2.10029	2.17406	1.18708	3.09962e-13	6.83558e-15
RP11-299G20.2	0.681415	0.80299	0.289205	5.92546e-09	4.48884e-14
RP1-63G5.8	12.2451	9.59771	1.79102	2.99004e-15	1.50857e-13
RP11-770J1.3	6.96558	6.9971	5.39462	2.55034e-06	2.15476e-07
RP11-93H12.4	1.43661	1.02	0.671525	4.29856e-17	4.47865e-08
LL22NC03-N64E9.1	1.69095	1.59927	0.304567	1.18875e-24	3.34531e-23
RP11-463J10.3	37.4472	29.2039	23.7613	5.17372e-08	0.00270729
RP11-305E6.4	1.37142	1.62247	0.654914	7.05091e-21	4.23466e-28
OSER1-AS1	24.3249	22.6371	16.9637	1.27384e-16	1.31398e-12
RP11-309L24.4	1.71828	1.93891	1.3782	0.00078159	5.75348e-08
RP4-681N20.5	1.39787	1.32044	0.945589	2.46409e-06	0.000228431
LINC00844	117.371	126.409	35.7356	1.91061e-15	3.59211e-19
RP11-172H24.4	11.7007	11.7823	8.44233	0.000353062	1.73831e-06
LINC00843	0.674395	0.608663	0.471896	0.000165381	0.00904434
RP5-965G21.3	0.805346	0.663343	0.449257	4.68873e-11	3.02593e-05
RP3-462E2.3	0.708332	0.751339	0.335827	2.86983e-07	9.40496e-08
GPR123-AS1	1.64564	1.78669	0.548103	2.90606e-13	1.61729e-11
RP11-367J11.2	32.9696	34.0936	23.632	8.03575e-07	5.14161e-09
FAM222A-AS1	2.50569	1.47135	0.917705	3.80018e-21	4.1379e-06
RP3-402G11.27	1.08644	0.976524	0.608598	4.39437e-07	0.000209901
AC007405.8	0.776042	0.528994	0.195671	4.61654e-10	9.7184e-09
RP11-265E18.1	1.99405	2.22612	1.25985	3.77869e-06	2.61988e-07
ZEB1-AS1	10.2797	9.57475	6.0975	3.4887e-14	9.11825e-13
RP11-278A23.4	1.17772	0.919118	0.402253	2.91199e-20	4.16691e-13
RP11-498C9.13	30.8159	27.763	19.5103	1.79382e-07	0.00015345
TBX2-AS1	7.62362	10.3048	4.31156	7.84337e-05	3.30374e-09
RP11-182L21.6	3.79007	3.5159	2.2524	1.09305e-10	1.13837e-11
RP11-849H4.4	29.6138	28.6458	17.9292	1.66675e-12	1.45591e-11
RP11-615I2.2	2.07447	1.69533	0.52355	1.66012e-06	3.62211e-09
RP11-818F20.5	0.992321	1.03811	0.684542	1.97278e-08	3.95143e-10
RP11-105C19.1	1.41042	1.25136	0.873975	1.12303e-05	0.00254347
RP11-250B2.5	0.686894	0.787965	0.456746	0.00131654	0.000111873
RP11-490B18.5	0.651852	0.492853	0.350893	7.5714e-10	0.000403936
RP11-1263C18.1	4.24899	1.67013	0.923728	2.99004e-15	0.0073587
RP11-298I3.6	1.58192	1.62955	0.914218	1.02591e-05	1.12815e-05
UBAC2-AS1	1.05124	0.986728	0.648223	5.82102e-10	1.10891e-08
RP11-21A7A.4	1.33973	1.10315	0.511792	4.73506e-21	3.39364e-14
RP11-359B12.2	4.33225	3.58343	1.83309	1.96176e-18	1.50599e-15
RP11-227B21.2	7.79852	3.96121	0.970474	1.70079e-18	4.73602e-09
Cabili_1930	1.144	1.08685	0.808398	0.00986835	0.00072727
RP11-464F9.22	1.7008	1.55162	0.60976	9.0913e-24	3.24249e-21
RP11-464F9.20	1.08314	0.868415	0.421619	4.64429e-17	2.3667e-13
RP11-348F1.2	0.956514	0.728815	0.492941	7.38381e-11	0.00202168
GBM_LOC049497	0.794366	0.779721	0.406531	1.15357e-15	1.93337e-16
RP11-23N2.4	1.11437	0.726743	0.543727	5.97388e-11	0.000449122
RP11-44N11.2	1.28007	1.16331	0.66532	1.64892e-12	1.87982e-13
RP13-1032I1.11	1.44016	1.25052	0.84632	1.36268e-07	0.000707415
RP11-91P24.6	0.664373	0.537877	0.457773	4.04873e-07	0.00699407
GBM_LOC031174	0.673811	0.628744	0.439467	0.000625136	1.45434e-05
RP11-159F24.3	1.11831	1.07382	0.767864	7.42307e-08	3.37065e-07
CTD-2651B20.1	0.90215	0.876057	0.577318	1.67725e-06	1.39629e-10
RP13-726E6.2	1.5474	1.08146	0.585022	2.31811e-14	2.48976e-09
RP11-334A14.5	5.49629	6.47218	2.90738	3.23446e-07	1.45591e-11
CTD-3074O7.5	4.317	3.49276	2.99857	6.01043e-08	0.000109098
RP5-1039K5.12	6.3705	7.32398	5.01612	0.00689818	1.02009e-05
RP11-195B17.1	1.28729	1.20594	0.949674	2.99615e-05	0.000135374
RP11-474G23.3	0.74463	0.819135	0.438275	1.64912e-07	6.44067e-09
RP11-315E17.1	1.088	0.682567	0.239365	8.05926e-21	5.10469e-15
NUTM2A-AS1	9.46912	9.25253	6.78411	4.16085e-09	5.58042e-10
DNAJC3-AS1	3.94545	2.50651	2.13634	3.43573e-14	0.00323595
RP11-210M15.2	7.61967	7.03391	4.08385	1.01595e-11	4.94247e-09
ASH1L-AS1	3.27284	2.51575	2.10043	4.78828e-13	0.00523212
PWAR6	16.151	13.763	6.7645	2.84595e-15	2.54545e-14
RBMS3-AS3	0.750078	0.607163	0.47423	0.000382125	0.00971567
LINC00403	5.23947	3.775	2.83675	1.58462e-05	0.00150147
RP11-352G9.1	0.430158	0.629334	0.305946	0.00358607	2.141e-07
LINC00632	4.57315	3.98827	1.4614	5.93613e-15	1.02552e-16
CTD-2132N18.2	2.2006	2.09313	1.19073	3.23191e-09	8.44669e-11
RP11-23E10.3	0.739223	0.549736	0.290596	5.48585e-14	5.62882e-09
RP11-266K4.14	7.35687	5.06701	3.6124	2.54695e-15	8.87974e-06
RP11-706O15.1	6.90167	4.283	0.800567	2.9186e-26	2.9124e-19
XLOC_009110	1.07293	0.890538	0.545199	4.54761e-08	0.000365571
CD27-AS1	58.0566	49.3178	36.0834	4.54607e-15	5.51576e-08
XXbac-BPG283O16.9	6.76394	4.68415	3.53269	1.15767e-12	1.39689e-05
LINC00526	3.31613	2.72094	2.2803	5.94818e-07	0.00349608
RP11-401P9.5	1.19522	1.31002	0.407646	8.81421e-11	1.70793e-14
RP11-401P9.4	13.6312	15.4074	5.13743	2.42487e-13	4.34634e-19
RP11-566K11.7	1.14687	0.995535	0.737319	1.39564e-07	0.00064056
ARHGEF26-AS1	15.412	14.3237	11.1047	0.00123547	0.00927982
GBM_LOC021874	1.7226	1.05703	0.203965	2.12275e-26	1.18337e-21
RP11-118K6.3	2.80553	1.80781	0.998298	6.53454e-18	1.8266e-07
RP11-186N15.3	0.570768	0.634805	0.349522	3.10922e-05	2.86445e-07
RP11-701H24.7	0.583222	0.72038	0.306459	0.00606824	9.46968e-06
RP11-701H24.3	4.29118	3.86192	2.02003	3.23446e-07	2.62044e-06
KB-1460A1.5	3.68398	5.09153	2.65625	5.5877e-05	1.40223e-11
RP11-182J1.3	4.7191	4.59141	3.13558	3.53354e-13	2.60443e-15
FAM226B	2.07669	1.80263	1.42718	8.51914e-07	0.0057879
AE000658.22	46.4695	49.2436	34.6981	1.35893e-05	2.14452e-08
CTC-543D15.8	6.31098	6.82397	5.30041	0.00117175	6.82824e-05
CKMT2-AS1	4.85238	4.14779	3.09793	4.49664e-08	0.000179484
RP11-893F2.13	0.821294	0.618014	0.428121	5.46355e-06	0.000179484
CXorf24	2.98129	2.89986	1.98887	1.07977e-06	1.04852e-06
AP003068.9	65.0971	63.2733	41.5812	1.45661e-12	1.89492e-14
AC007292.6	5.3057	4.71905	3.7914	2.25544e-06	0.000208581
RP11-458D21.1	2.83205	3.45509	2.14449	2.18778e-05	1.5768e-08
AC002310.7	1.2231	1.14448	0.886662	3.32152e-05	0.00201592
RP4-555D20.2	2.51586	1.5678	0.773883	3.94613e-11	5.05019e-05
RP4-555D20.1	1.16588	0.646289	0.381395	2.35864e-08	0.00285483
RP11-767C1.2	1.00036	0.837336	0.5304	6.33887e-11	3.43999e-06
RP4-555D20.4	1.06395	0.87856	0.519748	1.02328e-06	0.000174151
CTD-2007L18.5	12.3803	11.4295	9.91229	1.61616e-05	0.000426846
RP11-385G16.1	1.94238	2.51795	0.915563	1.38839e-06	4.08699e-11
RP11-57H14.2	2.27755	2.47629	1.56679	9.00771e-06	2.06479e-07
CTC-260E6.4	1.05158	0.847412	0.593407	3.74107e-06	4.73598e-05
RP11-57H14.4	3.92732	3.72633	2.4548	5.89059e-11	3.15799e-09
CDC37L1-AS1	8.19337	7.9231	6.09776	0.00193176	0.00229699
RP1-111C20.4	1.49889	1.14425	0.772653	1.44628e-13	1.87936e-06
RP11-618M23.5	0.597071	0.567416	0.290868	4.8742e-09	3.14493e-08
CTD-2649C14.2	1.02463	0.903832	0.579901	4.8742e-09	3.9601e-06
MRPL23-AS1	0.888408	0.610182	0.223109	2.76367e-22	6.59829e-14
RP11-74H8.1	132.478	54.7919	36.0008	1.6472e-13	8.08429e-05
RP11-284F21.10	1.7683	1.6077	1.09404	1.75466e-06	2.05792e-05
RP11-624G17.3	12.4937	7.05944	4.63631	3.70406e-13	8.92426e-06
LGG_LOC027853	2.34992	1.23017	0.171521	1.08215e-28	2.60947e-21
RP11-498P14.5	0.622623	0.501105	0.310513	1.86089e-14	7.69445e-09
RP11-38L15.3	4.46702	4.23768	1.973	1.27945e-08	8.72666e-10
RP11-658F2.8	5.45549	4.64507	3.28953	4.36635e-10	0.000158437
MGC32805	0.569962	0.523241	0.373186	0.00268888	2.14348e-05
RP11-124D2.3	71.4112	53.4508	30.1329	3.25755e-23	8.5571e-15
GBM_LOC004789	1.93127	2.09687	0.977857	4.3336e-08	7.95567e-11
RP11-203M5.7	1.94864	1.82297	1.26626	0.000434889	0.00307663
RP3-327A19.5	3.46487	3.35004	2.84611	7.31811e-05	0.000723518
LINC00693	9.54528	9.83771	4.65702	9.85477e-14	1.89492e-14
RP13-20L14.1	1.1102	0.661499	0.385923	4.42609e-10	0.00201373
MIR124-2HG	3.71986	1.3775	0.497701	1.9834e-21	1.42556e-07
ENTPD1-AS1	4.69229	4.10916	3.2387	6.67731e-06	0.00367377
GBM_LOC016701	0.88395	0.470568	0.248707	4.98439e-16	2.93838e-05
Cabili_1973	3.59204	2.89516	1.99343	5.40017e-09	3.03195e-05
RP11-517A5.4	1.08972	0.96756	0.51204	1.373e-09	5.14716e-09
FLJ16779	26.935	28.7891	6.66259	2.16807e-15	7.95066e-23
RP11-19P22.8	16.3688	14.4789	11.909	3.81372e-07	0.000259447
Cabili_2372	5.33595	4.60614	3.354	3.72619e-12	1.47613e-07
HAR1B	1.00229	0.345458	0.123699	3.14266e-26	3.03323e-08
HAR1A	1.99657	0.809889	0.270273	1.83294e-24	7.87057e-08
GBM_LOC025701	1.84646	1.53384	0.875461	8.69199e-11	5.35096e-06
LINC00609	0.498446	0.64721	0.21481	5.62693e-09	2.54214e-14
NUTM2B-AS1	5.80721	5.17232	3.74273	2.64802e-14	4.10785e-08
RP11-323P17.2	0.981298	1.21763	0.490032	1.03399e-06	1.54562e-10
RP11-477D19.2	1.01307	0.778163	0.645265	6.70744e-12	0.00339182
LINC00519	0.625621	1.44598	0.320354	9.7251e-06	1.8307e-20
LINC00511	50.4998	44.4622	29.6224	3.90798e-09	3.99683e-06
LINC00515	2.47042	2.32753	1.57499	2.68919e-06	7.0445e-05
LINC01024	1.41305	1.57548	1.01341	0.000465132	1.03672e-10
Cabili_782	0.88072	0.700353	0.361415	2.00132e-13	1.79324e-08
RP11-547I7.1	0.663634	0.530682	0.37681	0.000163971	0.00734236
TMEM246-AS1	1.91414	1.26058	0.668459	3.92869e-20	6.77604e-09
RP11-681H18.2	18.377	19.3729	15.3376	0.0084468	3.18062e-06
LINC00463	1.1275	0.774714	0.400815	3.14994e-11	8.63853e-06
LINC00461	64.4547	40.3997	34.6967	1.20754e-13	0.00440855
LINC00863	2.12156	1.74153	0.97926	4.44961e-18	8.5571e-15
RP11-414H17.5	0.656109	0.571053	0.224153	1.12853e-13	1.08183e-10
RP11-15F12.1	0.952966	0.953209	0.794194	8.81791e-05	0.000196251
RP11-110I1.13	1.62288	1.43437	1.04333	1.94816e-08	4.71726e-05
RP1-8B1.4	1.45497	0.905444	0.597893	4.63072e-11	3.51955e-05
SNHG14	34.5478	37.2018	27.7102	0.00153271	4.98523e-06
SNHG10	8.63664	9.72451	6.33481	1.20818e-05	4.65354e-07
SNHG19	96.7779	88.3524	44.3435	8.39628e-13	2.07687e-10
RP11-338N10.1	0.598076	0.64257	0.282813	3.36364e-08	8.76565e-11
RP11-334C17.5	1.64512	2.05104	1.04127	1.9952e-06	3.13175e-09
RP11-807H17.1	0.744939	1.34437	0.117223	1.17178e-10	1.8307e-20
JMJD1C-AS1	1.51971	1.53697	0.52991	2.4842e-14	4.95575e-16
GBM_LOC024887	0.730087	0.671722	0.467921	9.02751e-10	2.66814e-08
RP3-425C14.4	10.3916	8.22234	6.34396	8.76974e-08	0.00129487
GBM_LOC028474	1.18907	0.937604	0.614857	9.86406e-09	2.07024e-05
DUXAP8	6.91911	5.67058	2.65909	1.08085e-14	7.69445e-09
RP11-482M8.3	1.09003	0.495802	0.207097	2.31811e-14	2.16168e-07
RP11-143K11.5	1.82729	0.780472	0.196947	3.25755e-23	2.23086e-13
XXbac-B444P24.13	3.01923	2.13742	1.14729	4.96903e-20	1.26445e-13
GBM_LOC016392	3.51763	2.69472	2.14353	1.15767e-12	0.000228431
RP11-7F18.2	0.793899	0.683751	0.48659	6.90241e-06	0.000541096
RP11-713C5.1	1.44463	1.51606	0.412282	9.96738e-10	6.17964e-10
RP11-44N11.3	1.23482	1.1322	0.568239	1.91284e-10	3.95143e-10
RP11-417N10.4	19.7754	15.1433	11.2312	2.16807e-15	5.58471e-06
AP006216.11	2.38493	2.51538	2.01071	0.00216311	0.000115238
RP11-500C12.1	22.5902	21.4297	17.7473	1.93184e-06	0.000179134
AP000438.2	1.40016	0.518182	0.364849	1.19361e-15	0.00702465
MIR3911	4.22258	3.36792	2.01854	4.00956e-16	4.28627e-08
RP11-45A17.2	0.993729	0.910073	0.646124	2.05925e-05	0.00020177
RP11-442H21.2	141.654	116.248	78.7039	3.68311e-07	0.000426846
LGG_LOC043542	0.91503	0.80962	0.514629	2.09624e-07	1.01391e-05
RP11-159H10.3	1.0713	1.25742	0.153579	4.16287e-25	5.02306e-29
RP11-332H14.2	1.65547	1.57138	1.19592	9.87588e-07	4.98131e-06
RP11-809C9.2	0.632133	0.837531	0.329487	1.38839e-06	2.55578e-08
RP1-193H18.2	2.56868	2.50084	1.82003	2.80906e-06	2.01511e-06
RP11-689P11.2	0.650084	0.490242	0.338885	4.11659e-08	0.000947483
CTD-2555K7.2	1.24213	1.09219	0.649962	5.33694e-09	2.9211e-08
RP11-245P10.8	3.73029	3.39778	2.93856	5.0615e-05	0.0070056
RP11-104O19.4	1.37734	1.0018	0.725266	4.11686e-09	0.00276843
RP11-771K4.3	0.801856	0.814809	0.401162	5.23216e-08	7.0472e-09
RP11-1C8.7	2.97201	0.867417	0.168222	3.91123e-29	2.27159e-09
CTA-445C9.14	6.10229	5.67248	3.6443	4.94448e-12	5.16335e-09
RP11-6N17.4	15.3124	15.2548	11.4136	0.000153941	1.61138e-05
CTD-2017C7.1	1.53977	1.52059	0.838255	7.36051e-10	2.09865e-13
RP11-98D18.17	1.35927	1.01112	0.592382	7.03652e-11	4.00814e-05
RP11-496H1.2	4.92589	3.80428	2.63866	5.2306e-11	1.79175e-05
AF131215.9	4.77913	3.92574	2.66289	2.58682e-13	2.51965e-07
AF131215.2	4.20586	3.43485	2.62799	1.30347e-09	0.000243721
AC073641.2	6.16033	5.66803	4.93257	5.78229e-08	0.00049216
CTD-2653D5.1	0.700022	0.595297	0.199797	4.74669e-14	1.6728e-13
CTD-2228K2.7	20.4694	15.1126	10.8573	3.77e-11	0.000477879
RP11-296I10.3	11.7645	10.5959	8.19845	5.62781e-06	0.000481322
RP11-632P5.1	1.12831	1.17278	0.0613247	1.2044e-21	2.6793e-25
AC004471.9	2.59354	2.03044	1.42055	1.64912e-07	4.43584e-05
RP11-506K6.4	0.50517	0.768088	0.361884	0.000190961	3.34997e-15
TRIM52-AS1	22.4144	21.2288	16.6445	1.9952e-06	0.000162404
THAP7-AS1	3.17758	2.6036	2.11963	5.40017e-09	0.0030621
RP11-632F7.3	5.58375	5.53676	3.90719	0.000385491	5.05019e-05
NDUFA6-AS1	7.5405	5.34733	4.49202	9.88165e-13	0.00359036
RP11-513M16.8	6.69416	5.02565	3.10664	1.48139e-18	4.50521e-09
RP11-296L22.8	29.9628	19.8135	11.0879	4.51157e-14	2.10603e-06
CTD-2380F24.1	3.76354	1.77237	0.740874	6.08605e-22	1.4714e-07
RP11-4L24.3	1.73961	1.74459	0.930909	2.33175e-11	1.04444e-11
ARHGAP5-AS1	4.74795	4.44812	3.43122	5.99337e-06	0.000325851
RP11-231C18.2	0.898363	1.47786	0.0559762	2.84215e-24	6.67203e-30
LA16c-360H6.1	0.97185	0.61035	0.469816	3.22349e-14	0.000415325
RP11-16P6.1	2.1837	1.60466	1.09417	1.2307e-12	3.99683e-06
RP11-448A19.1	0.975155	0.802496	0.713085	3.16343e-06	0.00891135
CTC-241N9.1	2.80556	2.28205	1.81934	3.01283e-07	0.000794677
RP5-1116H23.4	0.627961	0.6276	0.297167	6.29303e-07	6.65169e-06
GBM_LOC031096	6.46554	3.50376	2.15394	1.17491e-12	0.00512195
HNRNPU-AS1	24.0161	19.6178	17.1003	6.59184e-13	0.00218177
Cabili_2314	1.4788	1.4428	0.935594	0.000630484	4.87875e-05
RP11-214N9.1	1.96512	1.77567	0.935671	7.02584e-13	9.14069e-10
LINC00960	1.26877	2.24422	0.387597	5.25783e-16	8.96224e-24
ZBTB20-AS4	1.03944	0.769164	0.258773	3.56666e-19	4.71324e-14
Cabili_1653	1.47491	1.94006	1.00662	0.00223203	8.97891e-07
RP11-130L8.1	1.17724	1.73516	0.808142	0.000328799	1.4865e-09
RP11-269C23.5	2.49334	2.17251	0.976668	1.08203e-17	2.30885e-12
RP11-130L8.2	0.671547	0.807755	0.501495	0.00268888	1.9252e-05
RP11-269C23.4	0.914504	0.818406	0.437374	1.66012e-06	1.79175e-05
Cabili_49	1.20643	1.0881	0.615263	2.92638e-10	2.24643e-08
NCAM1-AS1	8.69567	8.06082	5.66685	3.5619e-05	0.00140603
XXbac-BPGBPG55C20.1	0.520674	0.768938	0.329464	0.00114329	1.62545e-09
XXbac-BPGBPG55C20.2	1.26415	1.11217	0.574863	4.34721e-17	6.59829e-14
RP4-742C19.13	4.37857	3.8187	2.84339	5.53316e-07	0.000747647
TTC28-AS1	15.4903	13.992	10.3374	3.44351e-10	2.78937e-08
RP11-307C19.2	2.42265	0.876732	0.554046	2.67333e-12	0.000216448
AC004540.5	9.38518	9.08805	4.7328	1.24266e-06	6.74199e-07
AC004540.4	31.9128	44.203	17.624	0.000481805	3.95143e-10
RP11-402D21.2	7.91268	3.49543	2.22671	9.74826e-11	5.35096e-06
RP11-727F15.9	8.43272	8.1231	6.19794	7.42307e-08	9.33534e-07
RP11-320M2.1	1.17453	0.908444	0.731591	5.71445e-14	0.00021561
RP11-517A5.5	1.24838	0.976226	0.639499	1.71099e-09	2.34455e-06
RP11-81A22.4	4.50572	3.5806	2.2714	7.30833e-15	2.18029e-09
RP11-390P24.1	6.26847	5.49879	4.61411	3.08408e-07	0.00356296
AC062021.1	13.4819	4.41603	0.0982414	4.5553e-34	8.96224e-24
RP11-106M7.1	0.826597	0.633579	0.40604	0.000379226	0.000426846
CTC-329D1.2	1.05343	1.00443	0.730954	1.48313e-06	2.8143e-05
RP11-83N9.6	0.613247	0.798246	0.364538	8.09771e-10	7.47428e-17
RP11-266K4.9	5.47398	4.49198	3.26254	5.2306e-11	9.72302e-07
RP11-95I16.4	0.85851	0.837216	0.443756	4.23239e-05	8.05249e-05
CTB-92J24.2	0.599206	0.747664	0.42164	0.00161793	1.1304e-05
WDR11-AS1	1.48971	3.56609	0.937339	1.07977e-06	4.73736e-17
LINC00263	8.63575	4.77477	3.54483	2.65263e-17	0.000947483
RP11-451M19.3	1.25023	0.919108	0.815102	0.000151224	0.00270729
CTD-3099C6.5	1.04404	0.986491	0.470643	9.77344e-07	4.30526e-06
GBM_LOC032111	1.54235	1.01513	0.403821	1.5389e-10	6.60425e-05
CTD-3193O13.11	35.0272	19.8818	9.37809	9.45358e-20	3.78073e-09
CTD-3193O13.14	16.4169	14.1496	10.364	1.82751e-08	1.95579e-06
GBM_LOC026050	0.737421	0.681662	0.410033	8.94703e-13	3.18761e-11
LINC00404	2.49665	1.78394	1.41566	0.000127071	0.00551806
RP11-20I23.8	1.81037	1.49235	0.991376	3.61909e-06	0.00607493
AC009227.2	7.21547	6.0776	0.963148	6.87958e-33	4.91817e-30
Cabili_2025	0.921056	0.663748	0.391499	1.11158e-13	1.31668e-07
RP11-139J15.2	2.22079	2.19937	1.1905	9.11909e-12	2.18554e-10
LINC00882	9.69769	8.30767	5.46547	3.44351e-10	1.93096e-05
AC104655.3	3.1046	1.61375	0.677474	6.65966e-21	2.38452e-09
RP11-517P14.2	2.47082	2.18662	1.67935	1.25196e-07	2.13283e-05
RP11-179B2.2	0.698063	0.520338	0.365586	2.13042e-13	9.12758e-06
