# Supplementary material for: Expression of lncRNAs in Low-Grade Gliomas and Glioblastoma Multiforme: An In Silico Analysis
Source: PLoS Med. 2016 Dec 6;13(12):e1002192. doi: 10.1371/journal.pmed.1002192 (PMC5140055; doi:10.1371/journal.pmed.1002192)
Supplement: S9 Table — (XLSX) [file pmed.1002192.s012.xlsx]

## Sheet: Cox_Regression
lnc_Name	CoxCoeff	pValue
RP13-884E18.4	0.4333	0.00011
GBM_LOC027037	0.3553	0.00012
GBM_LOC014657	0.3738	0.00013
LOXL1-AS1	0.3825	0.00014
GBM_LOC016521	0.3649	0.00015
RP11-232C2.2	0.387	0.00021
GBM_LOC014269	0.3571	0.00022
RP5-1070A16.1	0.357398	0.00024
GBM_LOC049311	0.3924	0.00028
AGAP2-AS1	0.3544	0.00043
AC114803.3	0.338	0.00049
RP11-571M6.7	0.3543	0.00052
RP11-367G6.3	0.338	0.00053
RP11-90L1.8	0.3436	0.00053
LGG_LOC004274	-0.3512	0.00065
RP1-47M23.3	0.3774	0.00068
LINC00957	0.3237	0.00071
CTD-2201E18.3	0.3059	0.00083
LGG_LOC046822	0.3149	0.00085
LGG_LOC033069	-0.32739	0.00086
MIR31HG	0.341	0.00086
FAM85A	0.3111	0.00091
AC107218.3	0.3275	0.00099
GBM_LOC003250	-0.3136	0.001
RP11-489D6.2	0.3381	0.001
RP4-665N4.8	-0.3253	0.0011
RP11-586D19.1	0.3364	0.0011
RP11-452C13.1	0.3439	0.0011
LGG_LOC006718	-0.3145	0.0012
RP11-74C13.4	0.3241	0.0012
FUT8-AS1	0.3232	0.0013
LGG_LOC009423	0.342	0.0015
RARA-AS1	0.3203	0.0016
RP3-453C12.15	-0.2741	0.0017
GBM_LOC006263	0.3227	0.0017
RP11-168K11.2	0.3262	0.0017
LGG_LOC002159	0.336	0.0017
JHDM1D-AS1	0.3168	0.0018
RP11-258F1.1	0.3482	0.0018
RP4-610C12.1	-0.2999	0.002
CTD-2532N20.1	0.2952	0.0022
AP000695.4	0.308	0.0023
LGG_LOC025679	-0.2672	0.0024
WI2-87327B8.2	0.2854	0.0024
RP11-930P14.2	0.3228	0.0024
LGG_LOC020501	0.3365	0.0024
RP11-419I17.1	0.283	0.0025
CRNDE	0.2847	0.0025
GBM_LOC044464	0.3021	0.0025
LGG_LOC050066	0.3207	0.0025
DOCK9-AS2	0.2817	0.0026
GBM_LOC037262	0.3053	0.0026
RP11-104L21.3	0.3108	0.0026
LGG_LOC009687	-0.2978	0.0027
RP11-7F17.7	0.3132	0.0029
GBM_LOC011346	0.2694	0.003
RP4-647J21.1	0.3025	0.003
RP11-174J11.1	-0.2942	0.0031
GBM_LOC027881	0.2791	0.0031
RP11-424I19.2	0.3039	0.0031
AC018816.3	0.2847	0.0034
CTD-2306M10.1	0.2889	0.0034
GBM_LOC034156	0.278	0.0035
FRY-AS1	-0.29162	0.0037
KB-1410C5.5	0.2622	0.0037
RP3-412A9.16	0.2798	0.0037
RP11-542C16.1	0.2927	0.0037
RP11-254F7.2	0.2803	0.0038
LGG_LOC027480	0.2722	0.0039
LINC01166	0.2901	0.0039
CTC-338M12.5	0.3011	0.0041
GBM_LOC017203	0.30869	0.0041
CTD-3247F14.2	0.2865	0.0042
RP11-792A8.4	0.2806	0.0043
LGG_LOC012298	0.2629	0.0044
CTD-2325A15.5	0.2758	0.0044
RP11-404J23.1	0.2857	0.0044
OSMR-AS1	0.2918	0.0044
HOXC13-AS	0.2953	0.0045
RP11-12C17.2	0.2536	0.0047
GPC5-IT1	0.2929	0.0047
CTD-2506J14.1	0.2816	0.0048
RP11-410N8.4	0.2647	0.0049
LGG_LOC048219	0.284	0.0049
ZNF571-AS1	-0.2723	0.005
RP11-218M22.1	0.2655	0.005
GBM_LOC035821	0.2679	0.0051
GBM_LOC012795	0.2793	0.0051
GBM_LOC044929	0.2856	0.0053
GBM_LOC024471	0.2751	0.0054
GBM_LOC048862	0.2942	0.0054
GBM_LOC020286	0.2598	0.0055
GBM_LOC036006	0.2625	0.0055
LINC01503	0.2752	0.0055
FLJ42969	0.2761	0.0057
LINC00589	0.278	0.0059
GBM_LOC011948	-0.307691	0.006
RP11-211N11.5	-0.2637	0.0061
GBM_LOC030776	-0.274	0.0062
GBM_LOC046127	0.2815	0.0062
GBM_LOC020236	0.2686	0.0063
RP5-1136G13.2	0.2814	0.0065
MIR3179-1	-0.2779	0.0066
MIR4523	-0.266	0.0066
GBM_LOC004144	-0.2637	0.0066
RP11-755B10.2	-0.2388	0.0066
CISTR	0.2902	0.0066
CTD-3032H12.2	0.243	0.0067
GBM_LOC015829	0.2646	0.0067
CTC-467M3.2	0.2708	0.0067
CTC-467M3.3	0.2662	0.0068
LGG_LOC049989	0.2857	0.0068
GBM_LOC037954	0.2743	0.0069
RP11-430B1.2	0.2894	0.0069
RP5-839B4.8	0.2965	0.0069
LGG_LOC025878	-0.2572	0.007
AC006262.5	0.2814	0.007
RP11-80B9.1	0.284	0.007
USP12-AS2	0.2473	0.0071
AC034243.1	0.2558	0.0071
GBM_LOC010265	0.263	0.0071
RP11-134G8.7	0.26556	0.0071
GBM_LOC004963	0.2802	0.0071
LINC01268	-0.2607	0.0072
GBM_LOC024994	0.2678	0.0073
GBM_LOC003836	0.2651	0.0074
PCAT29	-0.2638	0.0075
LINC00892	0.2836	0.0075
RP11-638I2.4	-0.2338	0.0076
RP11-93B14.10	0.2469	0.0076
AC007879.4	0.2696	0.0076
LGG_LOC014443	0.2568	0.0077
GBM_LOC009310	0.264	0.0077
GBM_LOC043468	0.2691	0.0077
ARMCX3-AS1	-0.2264	0.0078
RP11-701P16.5	0.2588	0.0078
LINC00086	0.268	0.0078
GBM_LOC044302	0.2531	0.0079
GBM_LOC040579	0.2703	0.0079
CTB-147C13.1	0.2816	0.0079
RP11-173D3.1	-0.2825	0.008
RP11-753H16.5	0.2652	0.0081
RP11-762H8.4	0.2844	0.0081
LGG_LOC024926	-0.249	0.0083
ZMIZ1-AS1	0.2922	0.0083
AC004051.2	-0.2577	0.0084
LGG_LOC002033	0.2386	0.0084
RP11-275I4.1	-0.23942	0.0085
RP4-669H2.1	0.2284	0.0085
LINC01465	0.2454	0.0085
P4HA2-AS1	0.2588	0.0086
MEIS1-AS3	-0.2521	0.0087
CADM3-AS1	0.2646	0.0087
RP11-115C10.1	0.2345	0.0088
RP11-1137G4.3	0.2687	0.0088
GBM_LOC037039	0.25	0.0089
RP11-1293J14.1	0.254	0.009
CTD-2006K23.1	0.2909	0.009
RP11-2G1.1	-0.245	0.0091
GBM_LOC038919	0.2551	0.0091
CTC-251I16.1	0.2593	0.0091
GBM_LOC020541	0.2666	0.0091
RP11-334C17.6	-0.2635	0.0092
CTD-3094K11.1	0.2431	0.0092
GBM_LOC038942	-0.2554	0.0093
GBM_LOC040680	-0.2519	0.0093
RP4-647C14.2	0.2665	0.0093
LINC01231	0.2326	0.0094
CTD-2651B20.1	-0.2618	0.0095
RP11-321E8.4	0.2552	0.0095
LGG_LOC019578	-0.2547	0.0096
GBM_LOC026539	-0.224	0.0097
RP11-460I13.2	0.2453	0.0097
LGG_LOC012055	-0.2588	0.0098
RP11-745L13.2	-0.2345	0.0099
AC020571.3	0.2658	0.0099
RP1-76B20.12	0.288	0.0099
CTD-2309O5.3	-0.2417	0.01
GBM_LOC030782	-0.2403	0.01
LGG_LOC002456	-0.2388	0.01
XXbac-BPG300A18.13	-0.2256	0.01
LINC00571	0.2194	0.01
ADAMTSL4-AS1	0.2409	0.01
MGC27382	0.2438	0.01
RP11-6N17.4	0.2533	0.01
RP11-510N19.5	0.2613	0.01
LINC00460	0.2625	0.01
GBM_LOC017117	0.2655	0.01
RP11-398J10.2	0.2741	0.01
CASC20	-0.2495	0.011
RP11-314N13.9	-0.23893	0.011
GBM_LOC008831	-0.2374	0.011
RP5-968D22.1	-0.2308	0.011
CTC-471J1.9	-0.2278	0.011
RP11-17M16.2	-0.218	0.011
CTC-332L22.1	0.2308	0.011
LGG_LOC047270	0.2376	0.011
LGG_LOC029280	0.24	0.011
RP11-10E18.7	0.242	0.011
RP11-135F9.4	0.2478	0.011
LGG_LOC002625	0.2485	0.011
UBXN10-AS1	0.2501	0.011
CTC-551A13.1	0.2538	0.011
RP11-567J20.2	0.261	0.011
GBM_LOC031734	0.2634	0.011
LGG_LOC024046	0.2693	0.011
RP11-1026M7.2	0.2871	0.011
LINC00824	-0.2593	0.012
SOX21-AS1	-0.254	0.012
LGG_LOC003497	-0.2484	0.012
RP5-955M13.4	-0.2426	0.012
LGG_LOC022216	-0.2397	0.012
LGG_LOC013298	-0.238	0.012
RP11-666O2.2	-0.2352	0.012
GBM_LOC002584	-0.2345	0.012
RP11-298I3.3	-0.2323	0.012
LGG_LOC025600	-0.2232	0.012
LINC00843	-0.2132	0.012
RP11-834C11.8	0.2314	0.012
GBM_LOC034307	0.233	0.012
LGG_LOC047434	0.2343	0.012
GBM_LOC036758	0.2375	0.012
RP11-18H21.1	0.2401	0.012
PRKAG2-AS1	0.2483	0.012
GBM_LOC015945	0.2486	0.012
LGG_LOC030314	0.2611	0.012
GBM_LOC000764	0.26507	0.012
GBM_LOC009060	0.2718	0.012
GBM_LOC004238	-0.2534	0.013
LGG_LOC015768	-0.251	0.013
RP11-80A15.1	-0.2469	0.013
RP11-109D20.1	-0.2455	0.013
CTA-246H3.12	-0.2418	0.013
LGG_LOC006863	-0.241	0.013
RP11-57H14.2	-0.2253	0.013
LGG_LOC030053	0.2064	0.013
RP4-758J18.10	0.2203	0.013
RP11-115D19.1	0.2228	0.013
CTD-3194G12.2	0.2285	0.013
GBM_LOC035081	0.23093	0.013
LGG_LOC049501	0.23121	0.013
LA16c-444G7.1	0.2318	0.013
RP11-95G17.2	0.235	0.013
LGG_LOC047522	0.2429	0.013
GBM_LOC040610	0.244	0.013
AC003092.1	0.2463	0.013
LINC01152	0.2495	0.013
LINC01272	0.2517	0.013
GBM_LOC006472	0.2518	0.013
RP4-684O24.5	0.285	0.013
GBM_LOC035214	-0.2742	0.014
AC011747.4	-0.2405	0.014
AC021188.4	-0.239	0.014
CTC-453G23.8	-0.22628	0.014
RP11-950C14.3	-0.2228	0.014
RP1-292L20.3	0.2251	0.014
LGG_LOC027971	0.2307	0.014
GBM_LOC036345	0.2332	0.014
RP4-694B14.8	0.2349	0.014
RP11-1029J19.5	0.2372	0.014
LGG_LOC022022	0.2403	0.014
LINC01018	0.2404	0.014
RP11-13N12.2	0.2417	0.014
RP4-644L1.2	0.2507	0.014
LGG_LOC019343	0.2535	0.014
CTD-2552K11.2	0.254	0.014
LINC00477	0.254	0.014
HAR1B	0.2601	0.014
RP11-338E21.1	0.267	0.014
RP11-774D14.1	-0.2503	0.015
RP5-1164C1.2	-0.2428	0.015
RP11-486G15.2	-0.2264	0.015
RP11-131M11.2	-0.226	0.015
LGG_LOC052657	-0.2251	0.015
AC009892.10	0.2203	0.015
GBM_LOC019912	0.2253	0.015
CTC-297N7.9	0.2279	0.015
NDUFB2-AS1	0.235	0.015
LINC00707	0.2382	0.015
RP11-662M24.2	0.2411	0.015
NDUFV2-AS1	0.2414	0.015
RP11-642D21.2	0.2434	0.015
RP11-218C14.5	0.2439	0.015
RP11-212I21.2	0.245	0.015
LGG_LOC012154	0.2451	0.015
GBM_LOC029155	0.2475	0.015
HP09025	0.2517	0.015
RP6-65G23.3	0.25286	0.015
LGG_LOC027071	0.2554	0.015
GBM_LOC003683	-0.25568	0.016
RP11-728F11.4	-0.2456	0.016
LGG_LOC002203	-0.232	0.016
LGG_LOC005852	-0.227	0.016
LGG_LOC001679	-0.2197	0.016
GBM_LOC005954	0.2155	0.016
RP11-49I11.1	0.2161	0.016
AC053503.6	0.2231	0.016
LGG_LOC041433	0.2279	0.016
RP11-762H8.3	0.228	0.016
GBM_LOC009861	0.22816	0.016
LGG_LOC020972	0.2344	0.016
RP11-114H21.2	0.2359	0.016
RP11-45M22.3	0.2379	0.016
GBM_LOC000763	0.2464	0.016
RP11-61L14.6	0.2525	0.016
RP11-259O2.1	0.2675	0.016
LGG_LOC025895	-0.2406	0.017
AC005013.5	-0.2089	0.017
WASF3-AS1	-0.2085	0.017
GBM_LOC020397	0.2263	0.017
AC145676.2	0.2282	0.017
GBM_LOC000525	0.2284	0.017
CTD-2012M11.3	0.2304	0.017
GBM_LOC016624	0.2404	0.017
FLJ37505	0.2462	0.017
CH507-236L23.1	0.2574	0.017
ENTPD1-AS1	-0.2436	0.018
RP11-1113L8.1	-0.2343	0.018
LGG_LOC044158	0.2204	0.018
RP5-1184F4.7	0.2219	0.018
RP11-104H15.9	0.2234	0.018
RP11-283G6.4	0.2274	0.018
AC068580.6	0.2316	0.018
RP11-809N8.2	0.2375	0.018
CTD-2589M5.5	0.2536	0.018
GBM_LOC033344	-0.2431	0.019
WDR11-AS1	-0.2342	0.019
RP1-149A16.17	-0.2321	0.019
RP11-318E3.9	-0.2281	0.019
ZNF32-AS2	-0.2155	0.019
RP11-139J15.2	-0.2077	0.019
AC018462.2	-0.2063	0.019
LINC01248	0.2086	0.019
RP11-531H8.1	0.2105	0.019
GBM_LOC012056	0.216	0.019
RP11-93B14.9	0.2172	0.019
MIR497HG	0.2174	0.019
GBM_LOC002211	0.21743	0.019
AC011899.9	0.2245	0.019
RP11-1102P16.1	0.2272	0.019
LINC00535	0.2387	0.019
RP11-120K24.5	0.2441	0.019
GBM_LOC014154	0.2504	0.019
LINC00993	-0.2469	0.02
RP11-192H6.2	-0.2439	0.02
RP11-973N13.4	-0.2354	0.02
CTD-3064M3.4	-0.2274	0.02
AC007950.2	-0.2235	0.02
CTC-232P5.1	-0.2066	0.02
HOXC-AS2	0.1887	0.02
RP11-626G11.6	0.2158	0.02
RP11-51F16.1	0.2195	0.02
RP11-359E10.1	0.2234	0.02
CHRM3-AS2	0.2331	0.02
UNC5B-AS1	0.2341	0.02
AC013436.6	0.2342	0.02
LGG_LOC025898	0.239	0.02
RP11-607P23.1	0.2511	0.02
GBM_LOC007327	-0.2458	0.021
LGG_LOC004321	-0.2439	0.021
RP11-456O19.2	-0.2417	0.021
GBM_LOC015741	-0.2374	0.021
LGG_LOC017355	-0.23	0.021
RP11-2B6.3	-0.2297	0.021
NFYC-AS1	-0.2185	0.021
RP11-108O10.2	-0.2114	0.021
CTD-3222D19.12	-0.1867	0.021
GBM_LOC025741	0.2165	0.021
GBM_LOC006662	0.2198	0.021
GBM_LOC031448	0.22	0.021
RP5-901A4.1	0.2213	0.021
AC003984.1	0.2234	0.021
GBM_LOC007008	0.2251	0.021
MIR223	0.2309	0.021
LGG_LOC003870	0.2332	0.021
AC123886.2	0.2346	0.021
RP11-1002K11.1	0.2349	0.021
RP1-80N2.2	0.239	0.021
RP11-371A19.2	0.2434	0.021
GBM_LOC002121	0.2464	0.021
RP11-1018N14.2	0.2515	0.021
GBM_LOC014121	-0.2276	0.022
CTD-3064H18.4	-0.2266	0.022
LGG_LOC003464	-0.2244	0.022
RP11-42O15.3	-0.2178	0.022
RP11-105C19.1	-0.20937	0.022
LGG_LOC026090	-0.2044	0.022
SEMA6A-AS1	-0.2029	0.022
CTB-31O20.9	-0.19873	0.022
LINC01484	0.1959	0.022
GBM_LOC026351	0.2061	0.022
LGG_LOC017415	0.2095	0.022
LL21NC02-1C16.2	0.2102	0.022
RP11-102K13.5	0.2196	0.022
RP11-141M1.4	0.221	0.022
RP11-296O14.3	0.2218	0.022
CTD-2336O2.1	0.222	0.022
RP11-150O12.1	0.2229	0.022
FLJ36777	0.2231	0.022
RP13-977J11.2	0.2253	0.022
GBM_LOC040351	0.2281	0.022
CTD-2600O9.1	0.22919	0.022
RP11-361L15.3	0.2295	0.022
RP1-46F2.3	0.2493	0.022
AC016995.3	-0.2257	0.023
GBM_LOC040629	-0.223	0.023
RP11-97O12.7	-0.2162	0.023
LGG_LOC025819	-0.2105	0.023
RP11-353N14.4	0.2103	0.023
RP11-517B11.4	0.2111	0.023
GBM_LOC006193	0.213	0.023
GBM_LOC027470	0.2145	0.023
GBM_LOC026969	0.2203	0.023
LGG_LOC019527	0.2223	0.023
RP11-286B14.1	0.2256	0.023
CTD-2176I21.2	0.2278	0.023
MME-AS1	0.2285	0.023
RP11-121M22.1	0.229	0.023
RP11-1029J19.4	0.2331	0.023
GBM_LOC008825	0.241	0.023
LGG_LOC030061	0.245	0.023
LGG_LOC041810	-0.2009	0.024
RP4-614O4.12	-0.1919	0.024
RP11-486I11.2	0.20274	0.024
TMEM26-AS1	0.2112	0.024
RP11-254F7.3	0.2114	0.024
GBM_LOC048781	0.21862	0.024
GBM_LOC038116	0.2192	0.024
RP11-426C22.5	0.2232	0.024
RP11-47L3.1	0.2248	0.024
AC008278.3	0.2299	0.024
LINC01115	0.2363	0.024
CYP1B1-AS1	0.2376	0.024
RP11-379F4.4	0.2413	0.024
RP11-417L19.4	0.252	0.024
RP11-720L8.1	-0.2306	0.025
LGG_LOC003390	-0.2295	0.025
HID1-AS1	-0.2247	0.025
CTD-3234P18.2	-0.2159	0.025
RP4-785G19.5	-0.2157	0.025
RP11-96D1.10	-0.2103	0.025
GCSHP3	-0.20565	0.025
AC006116.24	-0.203	0.025
RP11-92C4.3	0.2057	0.025
LINC01057	0.2161	0.025
AL450992.2	0.2229	0.025
KCNA3	0.22551	0.025
LINC00544	0.2288	0.025
RP11-1143G9.4	0.2304	0.025
LINC00239	0.2307	0.025
AC090617.1	0.2381	0.025
LGG_LOC025773	-0.2263	0.026
AC006116.21	-0.20251	0.026
GS1-166A23.2	0.1896	0.026
LINC01285	0.2007	0.026
CTD-3185P2.1	0.206	0.026
CTD-2207P18.1	0.2099	0.026
AC004791.2	0.211	0.026
RP11-513G11.4	0.2125	0.026
GBM_LOC038258	0.2172	0.026
GBM_LOC036761	0.218	0.026
LGG_LOC040572	0.218	0.026
GBM_LOC018218	0.222	0.026
GBM_LOC020800	0.2236	0.026
GBM_LOC045313	0.226	0.026
AC078883.3	0.228	0.026
RP11-513O13.1	0.2316	0.026
RP11-25K21.1	0.2423	0.026
DLEU1-AS1	-0.2237	0.027
LGG_LOC004846	-0.2166	0.027
AC096570.2	-0.2139	0.027
AC012363.4	-0.2108	0.027
LGG_LOC044073	-0.2097	0.027
LGG_LOC033463	-0.2065	0.027
RP11-73O6.3	-0.2041	0.027
LGG_LOC044344	-0.2006	0.027
DPH6-AS1	0.2037	0.027
RP4-607I7.1	0.2043	0.027
GS1-124K5.4	0.2055	0.027
LINC00520	0.2118	0.027
GBM_LOC034318	0.2122	0.027
RP11-307P5.1	0.21757	0.027
GBM_LOC029033	0.2259	0.027
GBM_LOC027546	0.2261	0.027
GBM_LOC044156	0.228	0.027
LGG_LOC021924	0.2331	0.027
LGG_LOC021983	0.2333	0.027
RP11-626P14.1	-0.2313	0.028
GBM_LOC003737	-0.22176	0.028
GBM_LOC031008	-0.2148	0.028
AC006994.2	-0.20272	0.028
GBM_LOC049756	-0.1912	0.028
GBM_LOC011237	0.2017	0.028
CTA-989H11.1	0.2054	0.028
GBM_LOC039215	0.206	0.028
GBM_LOC022245	0.2078	0.028
RP5-1148A21.3	0.2102	0.028
AC062021.1	0.2106	0.028
GBM_LOC045410	0.2118	0.028
AF127577.11	0.2121	0.028
GBM_LOC042829	0.2141	0.028
RP11-27M24.1	0.2155	0.028
RP11-90P13.1	0.2159	0.028
GBM_LOC035841	0.2209	0.028
RP11-680F20.11	0.2226	0.028
RP5-823G15.5	0.2233	0.028
GBM_LOC022808	0.2265	0.028
GBM_LOC042735	0.23	0.028
GBM_LOC003738	-0.2497	0.029
RP11-384J4.2	-0.2343	0.029
CTC-454I21.4	-0.2154	0.029
RP11-167P11.2	-0.2085	0.029
AC010524.4	-0.20657	0.029
LINC01349	-0.1936	0.029
RP11-420L9.4	0.1948	0.029
RP11-644F5.11	0.198	0.029
HOXC-AS3	0.2021	0.029
LGG_LOC003630	0.2065	0.029
RP11-320G24.1	0.2114	0.029
RP11-338H14.1	0.2126	0.029
RP11-575F12.3	0.2169	0.029
RP11-469M7.1	0.2232	0.029
LGG_LOC008495	0.2259	0.029
AC104088.1	-0.1988	0.03
CTD-2525I3.6	-0.1965	0.03
RP3-337H4.9	-0.1963	0.03
LINC01162	-0.1875	0.03
RP11-458J1.1	0.1897	0.03
RP11-841O20.2	0.2092	0.03
AC002467.7	0.2106	0.03
RP11-74E22.8	0.2129	0.03
MIR137HG	0.21343	0.03
LGG_LOC038727	0.2143	0.03
RP11-465L10.10	0.215	0.03
PLCH1-AS1	0.2165	0.03
LEF1-AS1	0.2193	0.03
CCDC147-AS1	0.2197	0.03
RP11-429J17.7	0.2227	0.03
LGG_LOC036120	0.2276	0.03
LINC00343	0.2333	0.03
RP11-290M5.4	-0.2376	0.031
GBM_LOC033397	-0.221	0.031
LGG_LOC035768	-0.2198	0.031
LGG_LOC030897	-0.1952	0.031
RP11-645C24.5	-0.1941	0.031
RP11-144G6.12	-0.1923	0.031
AC005481.5	0.1966	0.031
GBM_LOC007586	0.2056	0.031
GBM_LOC008724	0.2167	0.031
GBM_LOC014092	0.2198	0.031
RP11-519G16.5	0.2224	0.031
LINC00426	0.2348	0.031
LGG_LOC003983	-0.2069	0.032
RP11-861L17.3	-0.2042	0.032
RP11-561O23.8	-0.1948	0.032
LGG_LOC026656	0.1903	0.032
LGG_LOC005731	0.1928	0.032
RP11-4B16.3	0.1978	0.032
GBM_LOC026345	0.206	0.032
LGG_LOC052700	0.2113	0.032
GBM_LOC000703	0.2161	0.032
GBM_LOC034409	0.2162	0.032
RP11-25K21.6	0.22	0.032
GBM_LOC048234	0.2232	0.032
MIR222HG	0.2307	0.032
LGG_LOC009327	-0.2228	0.033
RP11-219A15.4	-0.20654	0.033
GBM_LOC043471	-0.2022	0.033
RP11-793H13.11	0.19	0.033
AC007163.3	0.196	0.033
RP11-126O1.4	0.1972	0.033
RP11-615J4.3	0.2015	0.033
AC096772.6	0.2025	0.033
GBM_LOC021540	0.206	0.033
AC005789.11	0.2096	0.033
AP000230.1	0.2137	0.033
AC008060.5	0.2165	0.033
RP11-680F8.3	0.2189	0.033
AC110781.3	0.2213	0.033
LGG_LOC030946	-0.22133	0.034
GBM_LOC012774	-0.217	0.034
AP4B1-AS1	-0.202	0.034
LINC01276	-0.1995	0.034
CTD-2192J16.21	-0.19911	0.034
AC021224.1	-0.1983	0.034
RP11-549K20.1	-0.1962	0.034
LGG_LOC000131	-0.1961	0.034
LGG_LOC001873	-0.1919	0.034
CTC-270D5.1	-0.1907	0.034
LGG_LOC030154	-0.1845	0.034
RP4-668J24.2	-0.1843	0.034
AC004076.5	-0.1806	0.034
AC009052.12	-0.1768	0.034
RP11-403A21.1	0.1847	0.034
GBM_LOC001319	0.1856	0.034
AC096574.5	0.188	0.034
AC008753.6	0.1893	0.034
ZIC4-AS1	0.1921	0.034
RP11-310I24.1	0.1945	0.034
RP11-429E11.2	0.1984	0.034
RP11-4N23.4	0.2006	0.034
GBM_LOC046932	0.2007	0.034
RP11-575F12.2	0.204	0.034
LGG_LOC046819	0.209	0.034
GBM_LOC027880	0.224	0.034
GBM_LOC008677	-0.203	0.035
RP11-434D2.2	-0.1981	0.035
RP11-804H8.6	-0.1976	0.035
GBM_LOC040618	-0.1926	0.035
RP11-309L24.2	0.1844	0.035
RP11-527D7.1	0.1878	0.035
GBM_LOC044135	0.193	0.035
CRYM-AS1	0.1964	0.035
CTB-51J22.1	0.1967	0.035
RP11-568N6.1	0.1973	0.035
RP11-61J19.5	0.1997	0.035
LGG_LOC052199	0.2017	0.035
LGG_LOC035887	0.202	0.035
SNAP25-AS1	0.2031	0.035
RP11-1008C21.1	0.2045	0.035
AC013460.1	0.2082	0.035
GBM_LOC035849	0.2087	0.035
RP11-62F24.2	0.2139	0.035
PPP4R1-AS1	0.2168	0.035
GBM_LOC044999	0.2209	0.035
LGG_LOC021873	-0.2056	0.036
LGG_LOC033416	-0.2047	0.036
LGG_LOC025868	-0.2028	0.036
LINC00663	-0.1923	0.036
AF129075.5	-0.1845	0.036
RP11-728K20.3	-0.1727	0.036
RP11-597D13.8	0.1985	0.036
FLJ40194	0.2067	0.036
RP11-863P13.4	0.2081	0.036
HOXB-AS3	0.2132	0.036
CTD-2297D10.1	0.2312	0.036
PWAR1	0.2468	0.036
RP11-3B7.1	-0.2303	0.037
RP11-641D5.2	-0.2134	0.037
RP11-421L21.2	-0.2026	0.037
RP11-436K8.1	-0.2023	0.037
RP11-351D16.3	-0.1977	0.037
GBM_LOC022648	-0.1881	0.037
LINC00299	0.1806	0.037
GBM_LOC025149	0.1938	0.037
LGG_LOC017414	0.1942	0.037
GBM_LOC025095	0.1962	0.037
RP11-326I11.3	0.1975	0.037
RP11-775B15.2	0.1985	0.037
GBM_LOC005574	0.2006	0.037
CTD-3187F8.14	0.2017	0.037
RP11-816J6.3	0.2074	0.037
GBM_LOC043693	0.2105	0.037
GBM_LOC005150	0.2118	0.037
LGG_LOC045847	0.2118	0.037
CTD-2308G16.1	-0.20427	0.038
CTD-2292M16.8	-0.2007	0.038
TMCC1-AS1	-0.1986	0.038
STARD7-AS1	-0.1799	0.038
LGG_LOC038697	-0.1793	0.038
AC098820.4	0.1817	0.038
RP11-524O1.4	0.18289	0.038
CYP4F35P	0.1895	0.038
RP11-334A14.5	0.193	0.038
MAST4-AS1	0.2027	0.038
AC010649.1	0.2041	0.038
AC144831.1	0.208	0.038
GBM_LOC044101	0.2093	0.038
LGG_LOC030050	0.2138	0.038
LGG_LOC048630	0.2138	0.038
RP11-675F6.3	0.2138	0.038
CTC-444N24.7	-0.204	0.039
GBM_LOC005695	-0.2038	0.039
RP11-798G7.6	-0.1977	0.039
AC073321.4	-0.197	0.039
RP11-4O3.1	-0.17611	0.039
RP5-912I13.1	0.1864	0.039
GBM_LOC003480	0.1923	0.039
GBM_LOC047159	0.1934	0.039
RP11-308D13.3	0.2019	0.039
RP13-514E23.1	0.2021	0.039
RP11-3G20.2	0.2066	0.039
LGG_LOC013555	-0.2009	0.04
CTD-3137H5.1	-0.1946	0.04
CTD-2368P22.1	-0.19	0.04
RP11-93K22.6	-0.1893	0.04
RP5-855D21.3	-0.1883	0.04
RP11-144G6.4	-0.1786	0.04
AC004854.4	0.188	0.04
RP11-1136G4.2	0.1944	0.04
AC093818.1	0.1995	0.04
RP11-159N11.4	0.2013	0.04
RP11-51B23.3	0.2043	0.04
LGG_LOC047622	0.2056	0.04
GBM_LOC028430	0.2091	0.04
GBM_LOC048404	0.2111	0.04
RP11-114H24.3	0.2116	0.04
LMO7-AS1	0.2122	0.04
RP11-660L16.2	-0.193	0.041
LGG_LOC054306	-0.18967	0.041
RP11-325E5.1	-0.1838	0.041
GBM_LOC000360	-0.1813	0.041
LGG_LOC031632	0.1912	0.041
RP4-665J23.1	0.1923	0.041
RP11-19E11.1	0.1929	0.041
RP4-569M23.2	0.193	0.041
GBM_LOC005235	0.1959	0.041
GBM_LOC028105	0.1999	0.041
GBM_LOC028630	0.2036	0.041
LGG_LOC027734	0.2045	0.041
RP11-863P13.3	0.2072	0.041
RP11-395B7.4	0.2127	0.041
GBM_LOC044119	-0.194	0.042
KB-1440D3.14	-0.19137	0.042
GBM_LOC048074	-0.1836	0.042
XXbac-BPGBPG55C20.2	-0.1834	0.042
LGG_LOC002280	-0.1714	0.042
GBM_LOC042819	0.1856	0.042
GBM_LOC045109	0.1868	0.042
RP11-20J15.3	0.1889	0.042
RP11-175P13.2	0.1962	0.042
RP11-546K22.3	0.198	0.042
RP3-340N1.2	0.1988	0.042
GBM_LOC009704	0.2001	0.042
RP11-338K17.8	0.2011	0.042
GBM_LOC047475	0.2016	0.042
LGG_LOC022008	0.2026	0.042
VSTM2A-OT1	0.2161	0.042
AC006116.12	-0.1971	0.043
CTD-2349P21.11	-0.1945	0.043
RP11-567I13.1	-0.1929	0.043
CTC-338M12.6	-0.18553	0.043
GBM_LOC042930	0.1895	0.043
RP3-414A15.11	0.1922	0.043
RP5-1021I20.2	0.1967	0.043
RP11-279O9.4	0.1993	0.043
CTD-2232E5.2	0.2071	0.043
LGG_LOC011923	-0.1903	0.044
RP11-769O8.3	-0.1876	0.044
RP11-171L9.1	-0.1832	0.044
GBM_LOC047769	-0.17648	0.044
AC074286.1	-0.1763	0.044
RP11-178H8.7	-0.1684	0.044
RP11-710F7.3	-0.1663	0.044
AC116609.3	0.1779	0.044
CTD-2410N18.3	0.1934	0.044
GRM5-AS1	0.19611	0.044
GBM_LOC036475	0.1983	0.044
GBM_LOC025071	0.2077	0.044
RP11-272L13.3	0.21191	0.044
LGG_LOC027050	0.2142	0.044
LGG_LOC031482	-0.2158	0.045
RP11-110I1.13	-0.2077	0.045
GBM_LOC004721	-0.2054	0.045
GBM_LOC042959	-0.199195	0.045
CTA-243E7.1	-0.19677	0.045
AL133168.3	-0.1888	0.045
RP4-758J18.13	-0.173	0.045
CTD-2583A14.8	-0.1725	0.045
LINC00886	0.179	0.045
LGG_LOC051083	0.1807	0.045
LINC00087	0.183	0.045
AF127577.10	0.1853	0.045
RP5-921G16.1	0.1877	0.045
RP11-839G9.1	0.1878	0.045
FAM66D	0.1895	0.045
CTC-205M6.5	0.1933	0.045
LINC00290	0.1969	0.045
RP11-519G16.3	0.1983	0.045
AC090587.5	0.1999	0.045
FAM66A	0.205	0.045
GBM_LOC029143	-0.2104	0.046
RP11-323I1.1	-0.2035	0.046
LGG_LOC009426	-0.1908	0.046
LGG_LOC030204	-0.1906	0.046
GBM_LOC033219	-0.1897	0.046
RP11-119F7.5	-0.1878	0.046
RP11-137H15.4	-0.1843	0.046
CTD-2303H24.2	-0.1812	0.046
LGG_LOC050439	0.179	0.046
RP11-89N17.4	0.181	0.046
LINC01480	0.184	0.046
RP5-1120P11.1	0.1846	0.046
RP11-620J15.2	0.1849	0.046
AC002480.2	0.1856	0.046
RP11-252E2.2	0.1875	0.046
LGG_LOC040967	0.1945	0.046
GBM_LOC036510	0.1954	0.046
LGG_LOC041470	0.1957	0.046
LGG_LOC016915	0.2038	0.046
RP13-444H2.1	-0.2129	0.047
GBM_LOC046345	-0.2041	0.047
LGG_LOC019954	-0.1867	0.047
CTB-102L5.8	-0.1853	0.047
AC009404.2	-0.1696	0.047
GBM_LOC012987	0.1754	0.047
AP006621.9	0.1899	0.047
GBM_LOC005843	0.1954	0.047
LGG_LOC045658	0.1981	0.047
TBX5-AS1	0.1981	0.047
AF064858.6	0.1985	0.047
LGG_LOC046562	0.1996	0.047
AP002856.5	-0.1908	0.048
OXCT1-AS1	-0.1887	0.048
LGG_LOC035923	-0.186	0.048
LGG_LOC019536	-0.1822	0.048
CTC-548K16.2	-0.182	0.048
LGG_LOC025847	-0.1818	0.048
L34079.3	-0.1785	0.048
BMS1P20	-0.1767	0.048
GBM_LOC004415	-0.1762	0.048
RP11-651L5.3	0.1683	0.048
LGG_LOC041024	0.17606	0.048
LINC00323	0.1773	0.048
ARSD-AS1	0.1782	0.048
STEAP2-AS1	0.1813	0.048
RP11-617I14.1	0.1814	0.048
GBM_LOC033490	0.1874	0.048
GBM_LOC017985	0.1885	0.048
CTD-2126E3.4	0.1932	0.048
LINC00941	0.1976	0.048
RP11-89H19.1	0.1988	0.048
LGG_LOC036218	0.2012	0.048
C20orf166-AS1	0.2218	0.048
RP4-784A16.2	-0.2046	0.049
LGG_LOC041223	-0.1918	0.049
RP11-247A12.2	-0.18666	0.049
LGG_LOC050217	-0.1852	0.049
CTD-3234P18.6	-0.1837	0.049
LGG_LOC023363	-0.1832	0.049
GBM_LOC033297	-0.1807	0.049
GBM_LOC039022	-0.17759	0.049
CTC-490E21.10	-0.1711	0.049
CTD-2525I3.5	-0.1694	0.049
GBM_LOC049630	0.1769	0.049
RP11-350N15.5	0.1818	0.049
LINC01485	0.1819	0.049
MIR22HG	0.1841	0.049
LGG_LOC044019	0.1854	0.049
LINC00964	0.1858	0.049
SERTAD4-AS1	0.1887	0.049
LGG_LOC013852	0.1926	0.049
RP11-417E7.1	0.1968	0.049
RP11-333I13.1	0.1972	0.049
RP11-77H9.8	0.1972	0.049
FLJ41278	0.2011	0.049
LINC01468	0.2164	0.049
LGG_LOC032981	-0.1993	0.05
RP11-576I22.2	-0.19545	0.05
RP5-1021I20.5	-0.1944	0.05
GBM_LOC017978	-0.194	0.05
RP11-521B24.5	-0.1935	0.05
GBM_LOC002313	-0.19121	0.05
LGG_LOC004043	-0.1912	0.05
RP11-757G1.6	-0.187	0.05
CTD-2528L19.6	-0.1722	0.05
GBM_LOC042208	0.1691	0.05
RP3-436N22.3	0.1771	0.05
AC010504.2	0.1781	0.05
LGG_LOC046949	0.1818	0.05
CTD-2215L10.1	0.1839	0.05
GBM_LOC014003	0.193	0.05
RP11-17A4.2	0.1939	0.05
GBM_LOC043967	0.2014	0.05
RP11-326C3.2	0.2215	0.05
